# Supplementary material for: Notch signaling and Bsh homeodomain activity are integrated to diversify Drosophila lamina neuron types
Source: bioRxiv preprint, doi:10.1101/2023.06.15.545141, version 3 (2023-11-07)
Supplement: Supplemental Table 1 [file 545141_file02.xlsx]

## Sheet: Sheet 1 - catada_noiseq_results
catada_noiseq_results
	dam_only_l4_mean	dam_only_l5_mean	M	D	prob	ranking	log.rat	log.prob	genes
2L:31059-33599	107.82	74.7298	0.528867	33.0901	0.819491	33.0943	0.366583	1.71198	Cda5
2L:66422-68886	169.244	129.109	0.390521	40.1355	0.81771	40.1374	0.270688	1.70216	dbr,lncRNA:CR45339,lncRNA:CR45340
2L:76694-79782	71.0713	53.667	0.405233	17.4043	0.61743	17.409	0.280886	0.960844	galectin,CG11374
2L:98316-101514	142.016	140.438	0.0161249	1.57847	0.0633333	1.57855	0.0111769	0.0654278	Zir,Creld
2L:102022-104683	95.0948	119.85	-0.333788	24.7549	0.702494	-24.7571	-0.231364	1.21232	Nhe1,Zir,Creld
2L:105864-107857	110.671	178.519	-0.689793	67.8473	0.938041	-67.8508	-0.478128	2.78128	Sam-S,Nhe1
2L:109431-110796	178.968	194.967	-0.123525	15.9986	0.404173	-15.9991	-0.0856212	0.517805	Sam-S
2L:122075-125703	88.9547	90.5694	-0.0259517	1.61463	0.0696183	-1.61483	-0.0179883	0.0721604	CG3164,CG4822,ND-15,asRNA:CR44969
2L:128169-129499	437.953	255.588	0.776954	182.365	0.975547	182.366	0.538544	3.71101	CG3164,ND-15
2L:133114-134039	173.581	237.449	-0.452006	63.8678	0.885191	-63.8694	-0.313307	2.16448	Gs1,ND-15
2L:142258-146241	114.11	84.6408	0.431002	29.4694	0.77542	29.4725	0.298748	1.49352	CG11454,ND-15,CG31974,CG42399
2L:152337-155817	149.897	140.152	0.096975	9.7446	0.316641	9.74508	0.067218	0.380735	CG3709,ND-15,CG3436,CG42399
2L:156305-158198	68.2946	83.1983	-0.284783	14.9037	0.546158	-14.9064	-0.197397	0.790006	spen,CG3709,ND-15,CG3436,CG33635
2L:177809-179026	343.573	391.032	-0.186672	47.4596	0.608422	-47.46	-0.129392	0.937572	spen
2L:184052-185862	106.129	88.0268	0.269803	18.1021	0.598321	18.1041	0.187013	0.912101	spen
2L:186027-188318	168.082	96.0693	0.807018	72.0127	0.95028	72.0172	0.559382	3.00135	spen
2L:190210-193187	91.7518	60.8993	0.59131	30.8525	0.809262	30.8581	0.409865	1.65685	spen
2L:194817-197653	245.901	87.4641	1.49131	158.437	0.993842	158.444	1.0337	5.09004	spen
2L:197871-202027	131.666	99.0113	0.411221	32.655	0.792875	32.6576	0.285037	1.57443	spen
2L:207895-209161	39.2014	128.208	-1.70951	89.0069	0.978957	-89.0233	-1.18494	3.86118	CG11617,Tbc1d15-17
2L:209184-212172	80.6066	103	-0.353678	22.3937	0.685445	-22.3965	-0.245151	1.1566	Tbc1d15-17,kis
2L:212322-214555	157.354	283.381	-0.84873	126.027	0.975878	-126.03	-0.588295	3.72463	kis
2L:214582-215874	168.128	281.371	-0.74291	113.243	0.96659	-113.245	-0.514946	3.39891	kis
2L:226286-229247	157.584	128.259	0.297065	29.3254	0.718397	29.3269	0.20591	1.26726	lncRNA:CR44221,kis
2L:238339-240262	175.152	106.819	0.713438	68.3328	0.940458	68.3365	0.494518	2.82107	kis
2L:241677-242924	302.307	252.403	0.260289	49.9047	0.726845	49.9054	0.180418	1.29772	mir-965,kis
2L:252070-254803	111.317	57.6761	0.948634	53.6413	0.928346	53.6497	0.657543	2.63591	CG3645,Rpp30
2L:277446-280775	98.3275	101.645	-0.0478736	3.31758	0.13542	-3.31793	-0.0331834	0.145511	smo,CG11601,CG17078
2L:285237-287193	345.846	263.665	0.391427	82.1816	0.865089	82.1825	0.271316	2.00314	Amnionless,CG3625,asRNA:CR46262,asRNA:CR46263
2L:287680-288578	46.0029	101.481	-1.14141	55.478	0.936056	-55.4897	-0.791165	2.74975	Amnionless,CG3625,asRNA:CR46263
2L:295812-296744	88.995	183.029	-1.04028	94.0345	0.975089	-94.0403	-0.721067	3.69245	Stip1
2L:296771-299285	126.628	110.872	0.191691	15.7552	0.509338	15.7563	0.13287	0.712001	Pi3K21B,Stip1
2L:299450-302487	132.245	88.8219	0.574221	43.4227	0.875445	43.4265	0.39802	2.08301	Pi3K21B
2L:306679-309288	108.564	78.0174	0.476672	30.5461	0.794224	30.5498	0.330404	1.58097	Plc21C,lncRNA:CR43719
2L:316864-319975	133.368	163.638	-0.295102	30.2707	0.723715	-30.2721	-0.204549	1.28632	Plc21C,CG11912,CG11911
2L:320331-322871	106.1	53.5266	0.9871	52.5737	0.926718	52.5829	0.684206	2.61343	Plc21C,CG11911,CG33127
2L:344964-348254	69.1099	55.6704	0.311982	13.4395	0.518295	13.4431	0.216249	0.730424	Plc21C
2L:404620-407613	146.495	79.4923	0.881965	67.0027	0.949338	67.0085	0.611331	2.98259	Polr1B,AP-2alpha
2L:407644-411810	89.5395	168.291	-0.910361	78.7515	0.960891	-78.7567	-0.631014	3.24139	Polr1B,AP-2alpha
2L:415911-416758	131.037	203.267	-0.633408	72.2306	0.934555	-72.2333	-0.439045	2.72654	ebi
2L:451687-453886	182.036	197.116	-0.114828	15.0809	0.376463	-15.0813	-0.0795925	0.472347	crq,shv,CR43080
2L:454906-456973	216.852	290.25	-0.420584	73.3977	0.877863	-73.3989	-0.291527	2.10261	shv,CG4133,CR43080
2L:457552-458425	214.281	272.172	-0.345013	57.8908	0.824275	-57.8918	-0.239145	1.73883	CG4133,CG4297
2L:463227-466991	191.895	122.61	0.646243	69.2852	0.935267	69.2882	0.447942	2.73749	CG4297
2L:476496-479219	122.072	128.356	-0.0724252	6.28459	0.220458	-6.285	-0.0502013	0.249049	ush,MED15,cbt
2L:512687-513592	323.054	181.511	0.831716	141.543	0.97631	141.545	0.576502	3.74272	ush
2L:517504-519888	168.577	103.244	0.70734	65.3321	0.937455	65.3359	0.49029	2.77188	ush
2L:539185-540751	18.1452	128.188	-2.8206	110.043	0.988321	-110.079	-1.95509	4.44993	ush,lwr
2L:554075-555085	41.7914	66.2165	-0.663985	24.4251	0.74201	-24.4341	-0.460239	1.35484	rempA
2L:564726-566306	73.1902	78.7952	-0.106458	5.60504	0.237786	-5.60605	-0.073791	0.271528	Nle,uncNacbeta,CG2794
2L:567117-568935	47.5805	58.496	-0.297967	10.9155	0.446081	-10.9195	-0.206535	0.590738	Nle,CG2794,Sf3b1
2L:574896-575834	94.7515	191.681	-1.01649	96.9295	0.976107	-96.9348	-0.704575	3.73416	Ptth,Ipk2,cold
2L:740137-740431	68.5261	368.169	-2.42564	299.642	0.999517	-299.652	-1.68133	7.63454	Eaat2
2L:761854-765950	82.4544	49.5255	0.735425	32.9289	0.832112	32.9371	0.509758	1.78446	GABA-B-R3
2L:774866-777732	78.3161	153.665	-0.972412	75.3493	0.96084	-75.3556	-0.674025	3.24009	CG12506,CG13946
2L:808222-809919	242.517	126.389	0.940221	116.129	0.978753	116.132	0.651711	3.85155	Nnf1b
2L:814211-815100	46.3122	113.939	-1.2988	67.6271	0.958626	-67.6396	-0.90026	3.1851	Saf6,Pex12,Dbp21E2
2L:815279-816366	88.6762	184.54	-1.05731	95.8636	0.976336	-95.8695	-0.732874	3.7438	Saf6,Pex12,CG15880
2L:817192-819494	142.382	119.39	0.254082	22.9917	0.63827	22.9932	0.176117	1.01686	Clp,Pex12,CG15880,PGAP2
2L:820874-823647	214.523	148.983	0.525987	65.5403	0.910763	65.5424	0.364586	2.41646	Clp,CG3662,CG3862
2L:823796-825385	144.711	129.206	0.163503	15.5051	0.470789	15.506	0.113332	0.636368	dock,CG3662,CG3862
2L:826462-830616	192.358	156.001	0.302242	36.3574	0.747328	36.3586	0.209498	1.37566	dock,CG3862
2L:830842-832507	107.466	114.053	-0.0858258	6.58712	0.252341	-6.58768	-0.0594899	0.290808	dock
2L:841766-843376	130.759	123.09	0.0871972	7.66905	0.272036	7.66955	0.0604405	0.317503	drongo
2L:851919-854471	149.666	141.052	0.0855211	8.6142	0.285496	8.61462	0.0592787	0.336167	drongo,kraken,CG4291,CG13949,lncRNA:CR44060
2L:857780-859019	57.3443	84.5903	-0.560842	27.246	0.77028	-27.2518	-0.388746	1.47089	mir-375,lncRNA:CR45345
2L:863460-865426	72.2831	69.1671	0.0635723	3.116	0.135064	3.11664	0.044065	0.145099	aru,snoRNA:Me28S-U1230
2L:867101-869472	182.611	110.088	0.730116	72.5231	0.946234	72.5268	0.506078	2.92312	dbe,aru,PNUTS
2L:871457-873045	488.884	320.025	0.611306	168.859	0.954555	168.86	0.423725	3.09125	PNUTS
2L:873304-876777	101.641	113.049	-0.153464	11.4079	0.403461	-11.4089	-0.106373	0.51661	ninaA,CG15824,PNUTS
2L:891904-894650	173.009	80.647	1.10116	92.3623	0.975547	92.3688	0.763263	3.71101
2L:901624-907379	121.871	58.4903	1.05908	63.3806	0.950611	63.3894	0.734101	3.00802	Lsp1beta,snRNA:U1:21D,lncRNA:CR45261,scaRNA:MeU1:95C-A24
2L:952509-956524	149.573	120.49	0.311941	29.0834	0.723537	29.0851	0.216221	1.28568	CG4341
2L:963208-965924	120.309	68.4465	0.813698	51.8627	0.919033	51.8691	0.564013	2.51371
2L:969127-971690	161.435	69.5665	1.21449	91.8686	0.977201	91.8766	0.84182	3.78104
2L:987964-990065	164.613	77.2898	1.09073	87.3237	0.972774	87.3305	0.756038	3.60357	lncRNA:CR44801
2L:1052123-1052983	7.89524	46.1762	-2.54809	38.281	0.874504	-38.3657	-1.7662	2.07548	S
2L:1054844-1057095	321.992	233.339	0.4646	88.6534	0.902265	88.6546	0.322036	2.32549	S
2L:1065939-1068795	174.545	103.348	0.756092	71.1973	0.946768	71.2014	0.524083	2.9331	S
2L:1080673-1083246	218.391	181.79	0.26464	36.601	0.707583	36.602	0.183435	1.22957	ast,Atg4a,CG4629
2L:1083845-1085104	57.9441	74.4488	-0.361586	16.5047	0.594351	-16.5086	-0.250632	0.902267	Atg4a,CG4629
2L:1095027-1096710	185.097	161.002	0.201206	24.0954	0.587074	24.0962	0.139466	0.884486	CG4629
2L:1106857-1108750	93.3489	114.949	-0.300294	21.6005	0.656565	-21.6026	-0.208148	1.06876	CG14339,PolrMT
2L:1117409-1120038	94.7563	64.2277	0.561028	30.5287	0.804122	30.5338	0.388875	1.63026	Pino
2L:1122082-1123166	94.5882	123.514	-0.38494	28.9256	0.756896	-28.9282	-0.26682	1.41426	Pino
2L:1126809-1128172	167.241	227.638	-0.444815	60.3972	0.878244	-60.3988	-0.308322	2.10574	Pino
2L:1129096-1130333	123.049	153.011	-0.314403	29.9621	0.728931	-29.9638	-0.217927	1.30538	Pino,TBC1D23
2L:1130528-1132535	85.5853	68.1575	0.32849	17.4278	0.607125	17.4309	0.227692	0.934263	TBC1D23,Iris
2L:1149234-1151261	85.263	126.248	-0.566273	40.9854	0.865623	-40.9893	-0.39251	2.00711	Tfb4,Vps29,capt,l(2)10685
2L:1152010-1153226	91.1293	137.757	-0.596134	46.6273	0.890204	-46.6311	-0.413209	2.20913	Vps29,capt
2L:1153283-1156907	103.471	125.365	-0.276913	21.8944	0.649898	-21.8962	-0.191941	1.04953	capt
2L:1165461-1168205	59.2527	71.2978	-0.266978	12.0452	0.47458	-12.0481	-0.185055	0.643558	Plap,IntS14,CG14341
2L:1169799-1172546	77.0289	124.732	-0.695359	47.703	0.902774	-47.7081	-0.481986	2.33071	Plap,Charon,CG4887,CG31922
2L:1172647-1173275	107.113	570.055	-2.41197	462.942	0.999898	-462.948	-1.67185	9.19269	Charon,CG4887
2L:1179806-1186167	105.957	98.6999	0.102358	7.25707	0.27598	7.25779	0.0709491	0.322936	CG4896,CG5126,Tgt,CG5001
2L:1191741-1192642	23.8944	51.8379	-1.11734	27.9436	0.787405	-27.9659	-0.77448	1.54836	CG5001
2L:1254528-1258666	83.4409	82.3059	0.0197595	1.13503	0.0497455	1.13521	0.0136962	0.0510255	robo3
2L:1347504-1350499	210.448	103.172	1.02841	107.276	0.98	107.281	0.712839	3.91202
2L:1384305-1387438	105.81	103.684	0.0292788	2.12572	0.0863359	2.12592	0.0202945	0.0902923	robo2
2L:1388595-1392479	82.797	91.3194	-0.141343	8.52243	0.336412	-8.52361	-0.0979718	0.410094	robo2
2L:1403465-1405826	102.049	73.1684	0.479968	28.8805	0.778677	28.8845	0.332689	1.50813	robo2
2L:1416160-1419095	153.076	147.422	0.0542966	5.65403	0.176158	5.65429	0.0376355	0.193776	robo2
2L:1419983-1420959	168.567	234.759	-0.477863	66.1926	0.897354	-66.1943	-0.331229	2.27647	robo2
2L:1431214-1433778	95.6722	59.4963	0.685302	36.176	0.851985	36.1825	0.475015	1.91044	unknown
2L:1476857-1478618	181.167	114.213	0.665593	66.9541	0.935267	66.9574	0.461354	2.73749
2L:1585417-1586646	50.0585	94.8752	-0.922415	44.8167	0.901094	-44.8262	-0.639369	2.31359	nis,haf
2L:1599676-1602231	92.7862	51.5778	0.847159	41.2084	0.88369	41.2171	0.587206	2.15149	Rab3GAP1,haf
2L:1613189-1614105	180.928	359.912	-0.992226	178.983	0.987277	-178.986	-0.687759	4.36437	RFeSP,CG14352
2L:1646317-1647187	201.906	485.501	-1.26579	283.596	0.995954	-283.598	-0.877381	5.51008	lncRNA:CR45695
2L:1667629-1672516	96.7125	71.6136	0.43347	25.099	0.733257	25.1027	0.300459	1.32147	chinmo
2L:1686295-1690546	85.3836	40.5948	1.07266	44.7888	0.903308	44.8016	0.743513	2.33622	chinmo
2L:1713199-1714205	19.6067	57.1576	-1.5436	37.5509	0.86972	-37.5826	-1.06994	2.03807	frtz
2L:1715237-1720448	102.936	75.7734	0.441981	27.1624	0.755674	27.166	0.306358	1.40925	Rim2,frtz
2L:1722377-1723252	270.612	186.093	0.540204	84.5194	0.925038	84.5211	0.374441	2.59078	Rim2
2L:1723891-1724590	293.456	366.278	-0.319792	72.8214	0.806209	-72.8221	-0.221663	1.64097	Eno,Rim2
2L:1724752-1725292	7.63438	83.9534	-3.45901	76.319	0.969695	-76.3974	-2.3976	3.49643	Eno,Rim2
2L:1729375-1731781	78.6648	82.6843	-0.0718943	4.01945	0.168524	-4.02009	-0.0498333	0.184553	Eno,CG31937,CG17652,Rrp40,CG17646
2L:1751790-1754399	197.43	160.202	0.30145	37.228	0.749746	37.2293	0.208949	1.38528	CG17712,CG17648,Gr22f
2L:1884120-1886434	224.165	234.63	-0.0658215	10.4642	0.257379	-10.4644	-0.045624	0.29757	CG15358,Wdr62
2L:1888316-1890540	235.24	134.667	0.804741	100.574	0.966692	100.577	0.557804	3.40196	Wdr62
2L:1906584-1907866	173.762	323.429	-0.896336	149.667	0.981425	-149.67	-0.621293	3.98594	Wdr62
2L:1910345-1917873	130.482	78.0574	0.741241	52.4244	0.917684	52.4296	0.513789	2.4972	Wdr62
2L:1918956-1920532	211.695	76.6013	1.46655	135.094	0.990967	135.102	1.01653	4.70686	Wdr62
2L:1935839-1936949	211.624	141.73	0.578355	69.8937	0.924707	69.8961	0.400885	2.58637	Wdr62
2L:1938271-1939184	266.019	151.108	0.815953	114.911	0.971908	114.914	0.565575	3.57228	tRNA:Gly-GCC-1-1,Wdr62
2L:1942533-1945349	100.596	82.9279	0.278648	17.6684	0.596692	17.6706	0.193144	0.908055	Wdr62,CG15357,CG33673
2L:1945687-1950130	149.966	95.1704	0.656051	54.7956	0.916387	54.7996	0.45474	2.48155	erm,CG15357,CG33673
2L:1972590-1977524	125.403	60.225	1.05813	65.1776	0.952875	65.1862	0.733442	3.05496	CG15356,Der-1
2L:1985064-1988060	69.6938	72.135	-0.0496697	2.44123	0.106412	-2.44173	-0.0344284	0.112511	Got2,CG7289,Npc2a
2L:2005544-2009583	126.379	111.257	0.18386	15.122	0.489695	15.1231	0.127442	0.672746	CG4238,Nplp4,CG15353,tRNA:Gln-CTG-2-2,tRNA:Gln-CTG-2-3,CG33543,asRNA:CR45712
2L:2012106-2013955	403.253	137.493	1.55232	265.759	0.997761	265.764	1.07599	6.10164	CG4238,tRNA:Gln-CTG-2-5,snoRNA:Or-CD14
2L:2039583-2041170	229.458	180.573	0.345651	48.8854	0.814402	48.8866	0.239587	1.68417	Su(dx)
2L:2041263-2041708	261.987	262.521	-0.00293627	0.533757	0.0154198	-0.533765	-0.00203526	0.01554	Su(dx)
2L:2041810-2043746	147.114	137.888	0.0934319	9.22542	0.29374	9.22589	0.064762	0.347772	Su(dx),lncRNA:CR45298
2L:2073691-2075672	154.242	84.5621	0.867111	69.6797	0.951781	69.6851	0.601035	3.03201	dpr3
2L:2134496-2135937	82.1212	67.1321	0.290751	14.9891	0.550407	14.9919	0.201533	0.799413	GlyP
2L:2136250-2139326	110.037	71.3652	0.624693	38.6716	0.860636	38.6766	0.433004	1.97067	GlyP,tho2
2L:2140757-2141522	5.28133	64.5692	-3.61187	59.2879	0.947608	-59.3978	-2.50356	2.949	tho2
2L:2142772-2145099	122.441	91.7434	0.41641	30.6976	0.783308	30.7004	0.288634	1.52928	tho2,CG11723
2L:2146257-2147837	234.352	281.688	-0.26542	47.3359	0.737074	-47.3366	-0.183975	1.33588	Tbcd,CG11723
2L:2149874-2151301	76.1641	100.339	-0.397704	24.1752	0.71855	-24.1785	-0.275667	1.2678	Tbcd,AIF
2L:2151865-2154324	143.285	113.36	0.33797	29.9244	0.747176	29.9263	0.234263	1.37506	Tbcd,AIF
2L:2154445-2156018	52.9461	62.8657	-0.247748	9.91958	0.410585	-9.92267	-0.171726	0.528625	aop,AIF,CG15382
2L:2161777-2163227	125.536	114.907	0.127628	10.6284	0.371476	10.6292	0.0884647	0.464381	aop
2L:2163332-2164548	47.5413	60.7057	-0.352651	13.1644	0.5157	-13.1691	-0.244439	0.72505	aop
2L:2186255-2192089	75.1406	45.1955	0.733412	29.945	0.806031	29.954	0.508362	1.64005	CG10874,tRNA:Arg-TCT-3-1,COX7AL2,asRNA:CR44065,lncRNA:CR44066,lncRNA:CR43751,lncRNA:CR45290
2L:2197612-2200208	227.571	170.597	0.415719	56.9732	0.865445	56.9748	0.288154	2.00578	COX7AL2
2L:2201349-2204591	220.915	438.018	-0.9875	217.103	0.988575	-217.106	-0.684483	4.47196	CG31668
2L:2209731-2211674	119.253	73.4392	0.699404	45.8139	0.896565	45.8192	0.48479	2.26881	CG15385,CG33124
2L:2213169-2217905	126.461	137.358	-0.119245	10.8967	0.362519	-10.8973	-0.0826541	0.450231	Uch,CG15385,daed,mio,CG15386,CG34174,CG42371
2L:2229477-2229912	378.407	403.528	-0.0927294	25.1208	0.337557	-25.121	-0.0642752	0.411821	sau
2L:2232060-2233020	18.0168	81.9623	-2.18562	63.9455	0.956158	-63.9829	-1.51495	3.12716	Sec24CD,sau
2L:2233646-2234806	85.547	126.126	-0.560081	40.5794	0.862621	-40.5833	-0.388218	1.98501	Sec24CD
2L:2289628-2293153	80.0128	44.318	0.852338	35.6948	0.854097	35.705	0.590795	1.92481	robl22E,CG17237
2L:2309289-2312320	87.88	78.2364	0.167695	9.64363	0.380712	9.64509	0.116238	0.479186	CG16995,CG9967,eys
2L:2326909-2329173	189.859	224.074	-0.239048	34.2152	0.677634	-34.216	-0.165695	1.13207	CG9967,eys
2L:2357107-2358417	118.532	425.14	-1.84266	306.608	0.999109	-306.613	-1.27724	7.02363	Rab5,CG9967,eys
2L:2365330-2366197	122.558	367.968	-1.58612	245.411	0.997354	-245.416	-1.09941	5.93459	Rab5,Axud1
2L:2366481-2367063	48.9329	147.191	-1.58881	98.2576	0.983079	-98.2705	-1.10128	4.07919	Axud1
2L:2370854-2372577	148.18	122.015	0.280293	26.1651	0.684631	26.1666	0.194284	1.15401	CG3597,CG3609,Axud1
2L:2380774-2382267	102.665	240.182	-1.22618	137.517	0.989618	-137.522	-0.849924	4.56771	Atxn7,PIG-Wa,Eogt
2L:2492346-2495386	61.5977	94.2149	-0.613078	32.6172	0.823919	-32.6229	-0.424953	1.73681	oaf,Slh
2L:2546974-2548948	185.909	140.732	0.401646	45.1769	0.837277	45.1787	0.2784	1.81571
2L:2577341-2579660	212.799	225.996	-0.0868056	13.1969	0.320127	-13.1972	-0.0601691	0.38585	insv,Elba2,ND-B17.2,Arpc5
2L:2582100-2583978	78.3052	64.5733	0.278171	13.732	0.519873	13.7348	0.192814	0.733704	Drp1,Arpc5
2L:2710086-2711369	164.64	151.439	0.120581	13.2013	0.386489	13.2018	0.0835801	0.488556	CG31690
2L:2750204-2752615	199.222	142.336	0.485072	56.8856	0.891018	56.8877	0.336227	2.21657	Bacc,Pgk
2L:2753008-2760385	113.227	99.8868	0.180857	13.3406	0.464122	13.3418	0.125361	0.623849	Bacc,HemK2,Snapin,Tnpo-SR,Pgk,lncRNA:CR44772
2L:2761172-2761998	45.344	110.897	-1.29024	65.553	0.956107	-65.5657	-0.894324	3.126	Tnpo-SR
2L:2764680-2765552	226.29	129.124	0.809413	97.1658	0.966107	97.1692	0.561042	3.38454	Tnpo-SR,Snx21,aph-1
2L:2770756-2771830	318.187	325.26	-0.0317167	7.0726	0.127277	-7.07267	-0.0219843	0.136137	Syt1,colt,HINT1,CG15399
2L:2782289-2783107	46.491	76.3878	-0.716389	29.8967	0.805216	-29.9053	-0.496563	1.63587	Syt1
2L:2792042-2793518	84.8821	80.2386	0.0811628	4.64344	0.193944	4.64415	0.0562578	0.215602	Syt1
2L:2864159-2866866	181.335	175.422	0.0478248	5.91265	0.178397	5.91284	0.0331497	0.196498	CG2991
2L:2868783-2870931	99.0465	110.133	-0.153062	11.086	0.398677	-11.0871	-0.106095	0.508623	CG2991,CG8813,Ifrd1
2L:2882135-2882791	338.064	292.419	0.209257	45.6446	0.644784	45.645	0.145046	1.03503	NTPase
2L:2883979-2885096	184.517	146.427	0.333568	38.0896	0.776132	38.091	0.231212	1.4967	NTPase,lilli
2L:2948208-2950646	150.162	101.816	0.560554	48.346	0.889796	48.3492	0.388546	2.20543	lilli
2L:2957601-2959942	115.866	136.08	-0.23199	20.2134	0.595623	-20.2147	-0.160804	0.905409	Rbp9
2L:2961317-2963010	152.454	222.913	-0.548101	70.4583	0.91916	-70.4604	-0.379915	2.51529	Rbp9
2L:2968708-2970992	65.0374	125.243	-0.94539	60.2057	0.942163	-60.2132	-0.655294	2.85012	Rrp1,Rbp9,Ts
2L:2973614-2975902	138.596	96.2956	0.525342	42.3002	0.865064	42.3035	0.364139	2.00295	CG9641,gammaTub23C
2L:2981463-2982819	64.7695	113.641	-0.811095	48.8714	0.911603	-48.8781	-0.562208	2.42592	Chd1
2L:2983072-2984934	148.531	105.38	0.495162	43.151	0.862112	43.1539	0.34322	1.98131	Chd1
2L:2985102-2989835	80.6387	58.956	0.451834	21.6827	0.693206	21.6874	0.313187	1.18158	okr,Bem46,Chd1
2L:2990577-2992015	19.0713	63.044	-1.72495	43.9726	0.902316	-44.0065	-1.19565	2.32601	okr,Bem46,CG3558
2L:2992239-2994269	151.039	191.842	-0.344998	40.803	0.791069	-40.8045	-0.239135	1.56575	okr,CG3558
2L:2998145-2999163	108.877	98.1224	0.150049	10.755	0.392366	10.756	0.104006	0.498183	CG3558,Ccdc85
2L:2999310-3002093	139.867	176.555	-0.336067	36.6886	0.778957	-36.6901	-0.232944	1.5094	CG3558,Ccdc85
2L:3009868-3012842	83.7991	246.284	-1.55532	162.485	0.994453	-162.493	-1.07806	5.19448	Ccdc85
2L:3021815-3025443	121.278	108.059	0.166495	13.2187	0.453511	13.2197	0.115406	0.604242	CG17264,alpha4GT1,Prp40,Sf3b2
2L:3028431-3030810	144.331	223.819	-0.632951	79.4879	0.939415	-79.4905	-0.438728	2.8037	Sf3b2,CG17219,GABPI,asRNA:CR44147
2L:3033414-3036960	87.4225	56.0049	0.642452	31.4176	0.816489	31.4242	0.445314	1.69548	CG17258,SerRS,CG17260
2L:3056349-3060122	199.375	143.637	0.473057	55.7381	0.88285	55.7401	0.327898	2.1443	FASN2,FASN1
2L:3069619-3071122	130.516	120.07	0.120353	10.4461	0.356743	10.4468	0.083422	0.441211	toc
2L:3071206-3072893	108.762	112.377	-0.0471697	3.61481	0.142901	-3.61512	-0.0326956	0.154202	toc
2L:3078296-3080599	117.554	90.5768	0.376104	26.9767	0.740509	26.9793	0.260695	1.34903	toc
2L:3086085-3090605	103.795	88.5554	0.229085	15.2396	0.532137	15.2414	0.15879	0.759581	toc
2L:3125784-3127788	139.111	137.512	0.0166791	1.59901	0.0637405	1.5991	0.011561	0.0658626	toc,CG15403
2L:3144794-3145667	263.096	555.345	-1.07779	292.249	0.992621	-292.251	-0.74707	4.9091	Mad,toc,ND-B14.5B
2L:3171675-3172544	55.8765	163.512	-1.54908	107.635	0.98626	-107.646	-1.07374	4.28741	tRNA:Ser-AGA-2-4,CG31698,CG44002,CR44003
2L:3307606-3311016	149.568	77.0642	0.956672	72.5042	0.958219	72.5105	0.663115	3.17531	CG15406,CG3277
2L:3322998-3324760	215.658	74.9394	1.52495	140.719	0.99201	140.727	1.05701	4.82959	CG8837,CG33281
2L:3342347-3344035	187.771	146.013	0.362878	41.758	0.806387	41.7596	0.251528	1.64189	E23
2L:3348372-3349404	132.622	224.087	-0.756742	91.4654	0.960534	-91.4685	-0.524534	3.23232	E23
2L:3350375-3352755	350.092	296.034	0.241973	54.0584	0.700814	54.0589	0.167723	1.20669	E23
2L:3357623-3364570	139.229	114.131	0.286779	25.0989	0.684427	25.1005	0.19878	1.15337	CG8838,GramD1B
2L:3367893-3369824	153.604	115.551	0.410686	38.0529	0.818524	38.0551	0.284666	1.70663	GramD1B
2L:3449916-3450584	441.052	895.548	-1.02182	454.496	0.991425	-454.497	-0.708273	4.7589	Snx1
2L:3450795-3451854	132.18	224.223	-0.762431	92.0429	0.960738	-92.046	-0.528477	3.2375	Snx1,CG12795
2L:3453972-3455614	57.0034	73.2238	-0.361264	16.2203	0.588372	-16.2244	-0.250409	0.887634	CG12795,Cog3
2L:3456576-3457855	141.605	177.346	-0.324691	35.7405	0.761043	-35.742	-0.225058	1.43147	Cog3,Sec5
2L:3459828-3460869	85.2504	127.182	-0.577117	41.9317	0.870585	-41.9356	-0.400027	2.04473	CG3246,Sec5
2L:3468304-3469555	55.7602	92.6189	-0.73207	36.8586	0.858295	-36.8659	-0.507432	1.95401	ND-PDSW,Pif1,CG31776
2L:3505819-3510605	120.16	77.5477	0.631802	42.6124	0.878982	42.6171	0.437932	2.11182	tim,CG31954,lncRNA:CR45299,asRNA:CR45300,LeuRS
2L:3515154-3517574	210.336	178.395	0.237622	31.9411	0.671501	31.942	0.164707	1.11322	CG17593,CG3213,LeuRS
2L:3712360-3714256	90.6029	124.981	-0.464074	34.3776	0.815852	-34.3807	-0.321671	1.69202	cutlet,CG2818,CG31955
2L:3720736-3721866	151.114	176.899	-0.227283	25.7843	0.634606	-25.7853	-0.15754	1.00678	Shaw
2L:3722392-3723700	254.918	181.479	0.490231	73.4392	0.905903	73.4408	0.339802	2.36343	Shaw
2L:3749848-3753516	144.6	67.8674	1.09128	76.7329	0.964656	76.7406	0.756417	3.34264	CG10019
2L:3758561-3761893	123.279	99.5829	0.307955	23.696	0.683206	23.698	0.213458	1.1495	CG43707
2L:3762101-3765583	181.463	131.515	0.464442	49.9474	0.870178	49.9495	0.321927	2.04159	CG43703,CG43707
2L:3782999-3786162	68.4334	36.9761	0.888106	31.4573	0.822494	31.4698	0.615589	1.72875	bowl,CR31958,CG31960
2L:3807064-3810057	180.496	102.444	0.817134	78.0522	0.955649	78.0564	0.566394	3.11562	Reph,CG3407
2L:3810908-3811640	271.552	214.34	0.341327	57.212	0.816565	57.213	0.23659	1.69589	Reph,CG3407
2L:3811812-3813192	185.706	357.833	-0.946266	172.127	0.985293	-172.13	-0.655901	4.21941	CG3407
2L:3824994-3826343	40.0056	203.905	-2.34962	163.899	0.995827	-163.916	-1.62864	5.47911	slp1
2L:3826792-3827668	10.0383	177.351	-4.14302	167.313	0.996132	-167.364	-2.87173	5.5551	slp1
2L:3834114-3834494	37.297	409.74	-3.45758	372.443	0.999796	-372.459	-2.39661	8.49954
2L:3866000-3867425	35.6494	112.941	-1.66362	77.292	0.969771	-77.3099	-1.15314	3.49895	TTLL4B,Cep97
2L:3869568-3870816	77.2612	76.0655	0.0225021	1.19572	0.0519084	1.19593	0.0155973	0.0533042	Cep97,CG31957
2L:3870873-3872025	134.545	137.5	-0.0313478	2.95546	0.104122	-2.95563	-0.0217286	0.109951	capu,Cep97,CG31957
2L:3912572-3914113	73.0872	93.3445	-0.352946	20.2573	0.656921	-20.2604	-0.244644	1.06979	CG31773,fred
2L:4149226-4150718	243.413	104.851	1.21507	138.562	0.989415	138.567	0.842219	4.54829	CG2955
2L:4164471-4167792	81.6693	62.0632	0.396056	19.6061	0.656794	19.6101	0.274525	1.06942	Or24a
2L:4185924-4187454	176.192	149.324	0.238704	26.8682	0.651527	26.8693	0.165457	1.05419	lectin-24Db,Tbcc,lncRNA:CR44057,lncRNA:CR45791
2L:4210522-4213125	128.248	74.9928	0.774112	53.2552	0.920458	53.2608	0.536574	2.53147	ft
2L:4224654-4225323	159.872	254.48	-0.670637	94.6082	0.953079	-94.6106	-0.46485	3.05929	CG3702
2L:4228140-4229235	183.14	142.842	0.358526	40.2979	0.802214	40.2995	0.248511	1.62057	RpL40,lncRNA:CR44608
2L:4234617-4236107	460.579	173.161	1.41133	287.418	0.997201	287.421	0.978261	5.8785
2L:4249902-4251993	281.303	114.726	1.29393	166.576	0.993028	166.581	0.896881	4.96585	lncRNA:CR44059
2L:4255677-4259051	120.468	125.571	-0.0598572	5.10333	0.186412	-5.10368	-0.0414898	0.206301	lncRNA:CR44080,CG15425,lncRNA:CR45294,lncRNA:CR45295,lncRNA:CR45296
2L:4277307-4278405	122.064	212.619	-0.800629	90.5546	0.962723	-90.5581	-0.554954	3.28937	Art2
2L:4285040-4286525	194.641	263.377	-0.436316	68.7363	0.884606	-68.7377	-0.302431	2.1594	tutl
2L:4298987-4299820	279.813	269.12	0.0562155	10.6934	0.230025	10.6935	0.0389656	0.261398	tutl
2L:4304728-4306814	323.359	425.488	-0.395984	102.129	0.876463	-102.13	-0.274475	2.09122	tutl
2L:4307563-4308668	83.9424	148.651	-0.824458	64.7087	0.943664	-64.7139	-0.571471	2.87642	tutl
2L:4332899-4337320	173.795	150.86	0.204172	22.9346	0.581527	22.9355	0.141521	0.871142	Atet
2L:4365860-4368004	139.062	73.9838	0.910449	65.0784	0.948295	65.0848	0.631075	2.9622	Traf4,lncRNA:CR45363
2L:4376293-4378906	121.808	80.2154	0.602661	41.5929	0.871858	41.5972	0.417733	2.05461	Traf4
2L:4378922-4380461	150.575	129.078	0.222239	21.497	0.596819	21.4981	0.154044	0.908371	Traf4,CG17612
2L:4383649-4386556	77.9346	114.475	-0.554695	36.5403	0.842443	-36.5445	-0.384485	1.84797	CG17612,Vps53,Psf2
2L:4387087-4388087	66.0539	94.3413	-0.514246	28.2874	0.776794	-28.2921	-0.356448	1.49966	Tps1,Psf2
2L:4390349-4392282	106.039	89.3927	0.246367	16.6464	0.566412	16.6482	0.170769	0.835661	Tps1,CG3652
2L:4394240-4400349	73.6734	68.1624	0.112168	5.511	0.234656	5.51214	0.0777487	0.267431	l(2)k05819,CG3652,CG33003
2L:4407871-4409689	140.572	69.2072	1.02232	71.3651	0.958855	71.3724	0.708617	3.19065	CG15431
2L:4421352-4424571	212.35	113.24	0.907063	99.1105	0.972468	99.1146	0.628728	3.59241	CG15431
2L:4433719-4434409	148.727	141.513	0.0717289	7.21369	0.233486	7.21405	0.0497187	0.265902	CG15431,CG34177,CG34178
2L:4442030-4443556	130.206	141.91	-0.124183	11.7042	0.372087	-11.7049	-0.0860768	0.465353	morgue,CG15431,CG15432,Sfp24F
2L:4443571-4445775	63.1198	116.941	-0.88962	53.8216	0.926921	-53.8289	-0.616638	2.61622	MFS18,morgue,CG15432,Elp3
2L:4447028-4448302	216.92	152.074	0.512384	64.8452	0.904936	64.8473	0.355157	2.35321	MFS18,Elp3,CG15439
2L:4451167-4452044	187.983	188.974	-0.00758327	0.9907	0.0388295	-0.990729	-0.00525632	0.0396035	CG15439
2L:4452837-4454796	200.412	178.809	0.164544	21.6023	0.509288	21.603	0.114053	0.711897	Gs1l,CG15439,Secp43,ND-B8
2L:4481104-4483044	75.9701	97.7166	-0.363172	21.7465	0.680102	-21.7495	-0.251731	1.13975	dpy
2L:4529106-4532193	73.421	53.529	0.455871	19.892	0.666794	19.8972	0.315986	1.09899	dpy
2L:4560442-4562127	84.8402	107.938	-0.347387	23.0981	0.693435	-23.1007	-0.24079	1.18233	dpy
2L:4565578-4568546	95.743	99.4081	-0.054195	3.66501	0.144249	-3.66541	-0.0375651	0.155776	dpy
2L:4586567-4589149	65.7117	42.4366	0.630841	23.2751	0.725903	23.2837	0.437266	1.29427	dpy
2L:4707453-4708043	37.5599	160.967	-2.0995	123.407	0.990814	-123.425	-1.45526	4.6901	dcma
2L:4746452-4749026	206.023	228.802	-0.151295	22.7792	0.492061	-22.7797	-0.10487	0.677394	fipi
2L:4761143-4763608	156.696	169.118	-0.110057	12.4214	0.360967	-12.4219	-0.0762857	0.447799	fipi,CG42523
2L:4770064-4772881	401.3	220.274	0.86538	181.026	0.98173	181.028	0.599836	4.00251	fipi
2L:4812037-4813385	293.991	201.153	0.54748	92.8381	0.931399	92.8397	0.379484	2.67946	CG15629,lncRNA:CR45297
2L:4815098-4815457	6.8196	124.793	-4.1937	117.973	0.99028	-118.048	-2.90685	4.63356	CG15629,CG3225
2L:4838491-4839789	374.974	596.166	-0.668923	221.192	0.965903	-221.193	-0.463662	3.37855	tank,CG12194
2L:4841483-4845056	90.0733	60.2571	0.579969	29.8162	0.798321	29.8219	0.402004	1.60108	CG12194,mxt
2L:4846178-4847300	393.03	292.971	0.423884	100.06	0.887176	100.06	0.293814	2.18192	mxt,CG11927
2L:4849149-4852664	124.308	131.91	-0.085638	7.60227	0.270763	-7.60275	-0.0593597	0.315757	CG11927,mRpS2,Mon1,smog
2L:4883563-4887366	75.8294	94.9364	-0.324203	19.107	0.63229	-19.1097	-0.224721	1.00046	Cf2,CG3008
2L:4948931-4950233	31.454	52.7619	-0.746252	21.3079	0.698804	-21.3209	-0.517262	1.19999	betaggt-I,jet,Jon25Biii
2L:4961644-4962208	6.97283	82.2223	-3.55971	75.2495	0.968957	-75.3336	-2.4674	3.47237	CG34124
2L:4962313-4963314	49.8059	72.8848	-0.549302	23.0789	0.720814	-23.0855	-0.380747	1.27588	CG34124,asRNA:CR43824
2L:4965622-4967284	148.891	291.569	-0.96958	142.678	0.983893	-142.681	-0.672061	4.12851	eIF3i,CG34124,CG34125,Scox,asRNA:CR43824
2L:4970479-4971830	157.142	218.578	-0.47608	61.4361	0.893232	-61.438	-0.329993	2.23709	l(2)05714,Polr1C,CG14043
2L:4972020-4973408	129.604	160.885	-0.31192	31.2811	0.735827	-31.2827	-0.216207	1.33115	l(2)05714,CG14043,mRpL28
2L:4974673-4976545	125.46	136.23	-0.118815	10.7698	0.360992	-10.7704	-0.082356	0.447839	l(2)05714,CG14043,mRpL28,Gmd,CG3792
2L:4980380-4981883	243.519	320.697	-0.397181	77.1788	0.869135	-77.1799	-0.275305	2.03359	CG8891,CG8892,CG34126
2L:4984069-4986332	54.5163	133.228	-1.28914	78.7119	0.969186	-78.7225	-0.893564	3.47978	CG34126
2L:4988224-4990510	104.912	89.3901	0.230991	15.5217	0.536947	15.5235	0.16011	0.769913	CG34126
2L:4991105-4992835	113.619	164.547	-0.534296	50.9282	0.889644	-50.931	-0.370346	2.20404	Rtnl1,CG34126
2L:4994374-4996288	202.559	243.752	-0.267067	41.1923	0.728295	-41.1931	-0.185117	1.30304	Rtnl1
2L:5000251-5000716	166.562	83.2604	1.00036	83.3016	0.967812	83.3076	0.693394	3.43615	Rtnl1
2L:5000929-5001832	498.445	361.555	0.463219	136.89	0.910076	136.891	0.321079	2.40879	Rtnl1
2L:5037415-5039774	253.552	324.059	-0.353977	70.5073	0.831654	-70.5082	-0.245358	1.78173	Col4a1,CG31650,CG14042,SP555
2L:5041512-5044012	169.614	166.097	0.0302272	3.51677	0.111807	3.5169	0.0209519	0.118566	CG31650,CG33995,CG14042,SP555,CG44000,CG44001
2L:5045569-5052214	168.645	131.451	0.359459	37.1935	0.792188	37.1952	0.249158	1.57112	eIF3h,CG31650,CG9121,senju,CG33995,CG44000,CG44001
2L:5057789-5058807	186.293	168.824	0.142057	17.4694	0.453206	17.47	0.0984665	0.603683	Rpn11,Nepl3
2L:5095825-5098423	232.767	265.699	-0.190909	32.9325	0.595547	-32.9331	-0.132328	0.90522	CG5828,CG4230,ND-13A
2L:5098644-5100266	148.505	196.861	-0.406669	48.3564	0.848448	-48.3581	-0.281881	1.88683	CG4230,ND-13A,Msp300
2L:5186553-5188295	145.74	96.5749	0.593678	49.1652	0.896107	49.1688	0.411506	2.26439	snoRNA:Psi28S-2263,Msp300
2L:5209650-5211755	113.372	115.892	-0.0317236	2.52055	0.0954198	-2.52075	-0.0219891	0.100284	Cyp28d2,Cyp28d1,CG7742
2L:5219735-5221067	209.443	181.698	0.205008	27.7441	0.61514	27.7449	0.142101	0.954876	tkv,TpnC25D
2L:5224244-5226556	250.792	177.68	0.497216	73.1129	0.908168	73.1145	0.344644	2.38779	tkv
2L:5236540-5239154	142.403	206.568	-0.536646	64.166	0.911654	-64.1682	-0.371974	2.42649	tkv
2L:5252622-5256904	112.534	82.5347	0.447284	29.999	0.784148	30.0023	0.310034	1.53316	tkv
2L:5279700-5282134	117.43	86.0385	0.448748	31.3916	0.794733	31.3948	0.311048	1.58344	Bub1
2L:5304682-5307057	247.165	205.481	0.266472	41.6844	0.729084	41.6853	0.184704	1.30595	vri
2L:5318502-5320793	138.484	64.093	1.11149	74.3915	0.96313	74.3998	0.770424	3.30035	Ncoa6
2L:5321120-5322806	122.152	78.9876	0.628983	43.1647	0.881018	43.1693	0.435978	2.12878	Ncoa6
2L:5520398-5522894	220.687	157.434	0.487256	63.2531	0.898855	63.255	0.33774	2.2912	cl,CG7382,Vps52
2L:5524548-5525313	125.104	67.7817	0.884155	57.3219	0.934224	57.3287	0.61285	2.7215	Vps52,CG6907,Cap-D3,asRNA:CR44793
2L:5527465-5530515	114.169	72.8283	0.648597	41.3404	0.875598	41.3455	0.449573	2.08424	Coq6,Cox11,CG31915,Cap-D3,asRNA:CR44793
2L:5721179-5722664	61.3798	90.4411	-0.559215	29.0613	0.789746	-29.0667	-0.387618	1.55944	sip1,CG11149
2L:5722951-5724334	56.6301	125.888	-1.1525	69.2579	0.958931	-69.2675	-0.798852	3.19251	sip1,CG11030
2L:5734751-5736405	76.1056	63.0515	0.271471	13.0541	0.50117	13.0569	0.18817	0.695491	CG11147,CG11030
2L:5782144-5784010	282.628	136.842	1.04639	145.786	0.986819	145.79	0.725303	4.329	CG9171,CG31913
2L:5857687-5861568	89.583	61.3854	0.545329	28.1976	0.779644	28.2029	0.377993	1.51251	rau,TrissinR
2L:5871364-5872969	146.608	187.047	-0.351434	40.4386	0.796107	-40.4402	-0.243596	1.59016	rau
2L:5912585-5914573	85.9755	73.34	0.229325	12.6355	0.480254	12.6376	0.158956	0.654416	bchs
2L:5915560-5918175	90.7148	73.7406	0.298878	16.9742	0.590967	16.9768	0.207166	0.893959	bchs
2L:5918451-5919876	69.2494	101.507	-0.551712	32.258	0.81631	-32.2628	-0.382418	1.69451	bchs
2L:5945826-5946673	22.6117	62.4536	-1.46572	39.8419	0.88201	-39.8689	-1.01596	2.13716	Gpdh1,lncRNA:CR44986
2L:5948545-5949904	235.659	223.937	0.0736029	11.7212	0.261654	11.7214	0.0510177	0.303343	Gpdh1,CG9044,lncRNA:CR44986
2L:5950092-5952292	88.1317	59.3891	0.569462	28.7426	0.786667	28.7482	0.394721	1.5449	CG9044
2L:5953599-5954855	119.344	161.272	-0.434372	41.928	0.839109	-41.9303	-0.301083	1.82703	CG9044,CG13999
2L:5978345-5979584	364.262	290.016	0.328844	74.2461	0.816412	74.2468	0.227937	1.69506	chic
2L:5986765-5989182	206.873	142.063	0.542217	64.8102	0.912214	64.8125	0.375836	2.43285	ifc,eIF4A,Kdm5
2L:5991154-5995506	202.375	153.44	0.399363	48.9358	0.845013	48.9375	0.276817	1.86441	Kdm5
2L:5997306-5999600	436.267	552.993	-0.342049	116.726	0.832494	-116.726	-0.23709	1.78673	Kdm5,Tsp26A
2L:6000396-6002495	82.6586	158.19	-0.936418	75.531	0.959644	-75.5368	-0.649075	3.21001	Kdm5,Tsp26A
2L:6008501-6010422	111.499	78.975	0.497558	32.5237	0.811425	32.5275	0.344881	1.66826	CG9098
2L:6035221-6038582	129.237	95.0433	0.443365	34.1939	0.810076	34.1968	0.307317	1.66113	mtm,CG9109,CG9117,CG31643
2L:6038645-6041668	57.1291	71.5073	-0.323865	14.3782	0.542392	-14.3818	-0.224486	0.781742	Pfas,CG9117,CG31643
2L:6045249-6047498	124.686	108.222	0.204303	16.4638	0.528244	16.465	0.141612	0.751294	Pfas,slmo,IPIP,CG34179,mir-966
2L:6051632-6060362	113.063	86.9633	0.378649	26.0998	0.732366	26.1026	0.26246	1.31814	CG9135,CG13995,ND-51,CG34180
2L:6060503-6061999	207.076	118.312	0.807566	88.764	0.962366	88.7677	0.559762	3.27986	CG13995,ND-51,CG13994,CG34180
2L:6062576-6063964	167.939	295.661	-0.816003	127.722	0.973995	-127.724	-0.56561	3.64946	ND-51,CG13994,Fbw5
2L:6065783-6068373	139.944	63.1378	1.14828	76.8064	0.9657	76.815	0.795924	3.3726	Fbw5,CG9147,CG9150,Pfdn1
2L:6070986-6074190	214.827	110.041	0.965141	104.787	0.97715	104.791	0.668985	3.77881	CG9154,lncRNA:CR43801,Kr-h2
2L:6103499-6107325	219.335	132.614	0.725901	86.7206	0.956183	86.7237	0.503156	3.12774	stai
2L:6125366-6126193	283.756	264.237	0.102814	19.5182	0.363028	19.5184	0.0712652	0.45103	WDR79,stai,Arpc4
2L:6126670-6127732	137.741	202.508	-0.556014	64.7663	0.916794	-64.7687	-0.3854	2.48643	WDR79,B9d2,tctn,Arpc4
2L:6171076-6173554	76.0507	71.6829	0.0853319	4.36777	0.188524	4.3686	0.0591476	0.208901
2L:6181359-6183569	326.091	194.917	0.742413	131.174	0.969211	131.176	0.514601	3.4806	smal
2L:6184555-6186283	232.887	145.329	0.680308	87.558	0.951298	87.5606	0.471554	3.02203	smal
2L:6188211-6190642	191.899	155.488	0.303541	36.4106	0.747405	36.4119	0.210398	1.37597	smal
2L:6193471-6194478	421.535	499.967	-0.246181	78.4323	0.723359	-78.4327	-0.17064	1.28503	smal
2L:6198821-6201355	98.7262	60.0458	0.717369	38.6804	0.867405	38.687	0.497242	2.02045	smal
2L:6204643-6206117	367.048	548.257	-0.578884	181.209	0.949059	-181.21	-0.401252	2.97708	smal
2L:6213099-6213799	187.881	186.764	0.00860308	1.11704	0.0422392	1.11707	0.0059632	0.0431572
2L:6241754-6243879	265.984	163.059	0.705949	102.926	0.960483	102.928	0.489326	3.23104
2L:6252407-6254226	240.528	159.114	0.596145	81.4141	0.936361	81.4163	0.413217	2.75453	Ddr
2L:6270849-6274822	79.6847	75.5961	0.075991	4.0886	0.175827	4.08931	0.0526729	0.193375	Ddr,lncRNA:CR46410
2L:6324978-6326234	212.605	261.4	-0.298083	48.795	0.772366	-48.796	-0.206616	1.48002	PDZ-GEF
2L:6326476-6328248	188.543	216.014	-0.196227	27.4704	0.599873	-27.4711	-0.136014	0.915973	PDZ-GEF
2L:6334464-6336527	83.493	84.0851	-0.0101934	0.592014	0.0251908	-0.592102	-0.00706556	0.0255136	Pez
2L:6344664-6345696	238.966	147.342	0.697636	91.6239	0.955394	91.6265	0.483564	3.1099	Cpr,CG9497
2L:6353627-6355448	80.3542	122.497	-0.608304	42.143	0.875165	-42.1474	-0.421644	2.08077	ppk7,ppk14
2L:6381179-6383032	68.9489	96.992	-0.49234	28.0432	0.77201	-28.0475	-0.341264	1.47845	Nepl5,DIP-epsilon,Nepl6
2L:6383117-6384878	73.9273	74.52	-0.0115197	0.592664	0.0251908	-0.592776	-0.00798488	0.0255136	Nepl5,DIP-epsilon,Nepl6
2L:6412670-6414334	125.501	85.1517	0.559597	40.3498	0.861756	40.3536	0.387883	1.97873	Tig,CG13982
2L:6424640-6425997	149.143	280.318	-0.910371	131.175	0.979695	-131.178	-0.631021	3.89687	Acox3,Fic
2L:6444863-6447716	88.7407	103.256	-0.218556	14.5152	0.513181	-14.5168	-0.151491	0.719862	Acox3,retm
2L:6450859-6452527	111.73	273.694	-1.29255	161.964	0.992723	-161.969	-0.895925	4.92299	retm
2L:6456452-6458712	83.4849	69.777	0.258763	13.7079	0.513893	13.7103	0.179361	0.721327	retm,frj,Rchy1
2L:6475276-6477836	98.0329	118.527	-0.273883	20.4946	0.628372	-20.4964	-0.189841	0.989861	CG9536,Sec61alpha
2L:6484446-6487924	161.65	79.1526	1.03017	82.4978	0.967964	82.5042	0.714058	3.44091	Daxx,KFase
2L:6488084-6489278	371.33	379.16	-0.0301025	7.82937	0.128193	-7.82943	-0.0208654	0.137188	epsilonCOP,Daxx,KFase,Phf5a
2L:6498435-6499620	77.2788	69.0542	0.162345	8.22465	0.336997	8.22625	0.112529	0.410976	CG9550,CG31637
2L:6558948-6559783	73.9489	154.715	-1.06501	80.7657	0.967761	-80.7727	-0.738207	3.43457	COX5B,COX5BL,Trmt6
2L:6615273-6616828	159.152	166.253	-0.062973	7.10077	0.212265	-7.10105	-0.0436496	0.238593	CG11050,DIP-iota
2L:6617444-6618414	20.7156	76.1925	-1.87893	55.4768	0.939237	-55.5087	-1.30237	2.80077	CG11050,DIP-iota,lncRNA:CR44913
2L:6626799-6628241	302.234	107.497	1.49137	194.737	0.995725	194.742	1.03374	5.45502	Oatp26F
2L:6628968-6630155	267.932	135.552	0.983027	132.381	0.983104	132.385	0.681383	4.0807	Oatp26F
2L:6630681-6631691	555.6	212.437	1.38701	343.163	0.997252	343.166	0.961403	5.89685	Oatp26F
2L:6648115-6650554	28.6184	69.4155	-1.27831	40.7971	0.886209	-40.8171	-0.88606	2.17339	CG31635,Tango1
2L:6653067-6654431	36.2809	77.5854	-1.09658	41.3045	0.887939	-41.3191	-0.760088	2.18871	CG31633,Tango1
2L:6655472-6656065	23.8642	135.869	-2.50929	112.004	0.98883	-112.033	-1.73931	4.49448	CG31633,CG31636,Tango1
2L:6656120-6657244	197.481	177.561	0.153401	19.9203	0.481858	19.9208	0.10633	0.657505	CG31633,CG31636
2L:6661575-6663976	160.459	77.7179	1.04588	82.7407	0.96855	82.7473	0.724951	3.45934	cup,Ube4A,CG13771,CG34310
2L:6668343-6670219	185.996	130.304	0.513388	55.6919	0.893588	55.6943	0.355854	2.24043	cup,Spn27A,CG34310,Galt
2L:6672428-6675104	132.168	103.472	0.353129	28.6958	0.74257	28.6979	0.24477	1.35701	cort,cup,Spn27A,CG34310
2L:6676057-6677980	194.123	189.995	0.0310161	4.12886	0.117074	4.12898	0.0214987	0.124514	cort,Nhe3,Nse1
2L:6687337-6688435	98.77	139.871	-0.501949	41.1007	0.854631	-41.1037	-0.347924	1.92848	CG11327,Tsp
2L:6722023-6722672	121.241	174.13	-0.522286	52.8888	0.891094	-52.8914	-0.362021	2.21727	homer
2L:6728217-6730067	158.308	71.5952	1.1448	86.713	0.973359	86.7206	0.793516	3.6253	Liprin-alpha
2L:6733321-6734894	78.653	92.2819	-0.230546	13.6289	0.501603	-13.6308	-0.159802	0.696358	TTLL3B,Liprin-alpha
2L:6773366-6774783	246.951	132.149	0.902064	114.802	0.976819	114.806	0.625263	3.76444	LUBEL,CG17378
2L:6795486-6796547	310.48	330.283	-0.0892046	19.8035	0.333715	-19.8037	-0.0618319	0.406038	nrv2
2L:6854236-6855434	33.2428	58.3039	-0.81055	25.0611	0.752341	-25.0742	-0.56183	1.3957	Rca1,l(2)k09022
2L:6902994-6904699	138.022	110.24	0.32425	27.782	0.720433	27.7839	0.224753	1.27451	Nlg2,mir-932
2L:6906716-6908076	90.8905	144.353	-0.667399	53.4625	0.914402	-53.4666	-0.462606	2.45809	Nlg2,Rat1,Polr1F
2L:6925601-6926095	54.2044	119.439	-1.13979	65.2343	0.95402	-65.2443	-0.790041	3.07956	Hrb27C
2L:6930901-6932993	87.8357	76.1402	0.206149	11.6955	0.448753	11.6973	0.142892	0.595573	Hrb27C,CG18304,CG43232
2L:6951295-6954079	60.6621	79.4112	-0.388547	18.7491	0.640763	-18.7531	-0.269321	1.02377	SA1,CG13775
2L:6954435-6958827	102.23	105.728	-0.0485385	3.49799	0.140153	-3.49832	-0.0336443	0.151	SA1,CG13775,CG3430,Atac1
2L:6959625-6961937	79.2977	68.271	0.216006	11.0267	0.436285	11.0288	0.149724	0.573206	CG3430,Atac1,Hmgcl,sip2
2L:6968763-6969228	60.9834	565.151	-3.21215	504.168	1	-504.178	-2.22649	Inf	snRNP-U1-70K
2L:7023544-7024306	102.881	191.964	-0.899862	89.0831	0.967939	-89.0877	-0.623737	3.44011	Gart,CG31908
2L:7031123-7032271	91.9207	142.572	-0.63323	50.6514	0.903893	-50.6553	-0.438921	2.34229	Rab30,Caper
2L:7036657-7037685	53.6252	145.855	-1.44355	92.2294	0.97944	-92.2407	-1.00059	3.88442	Caper,milt
2L:7050508-7053028	84.2064	78.3031	0.10486	5.90328	0.242239	5.90421	0.0726835	0.277387	milt
2L:7054159-7057923	87.7404	78.8829	0.153529	8.85752	0.350458	8.85885	0.106418	0.431488	Mnn1,milt
2L:7064564-7066297	91.2089	80.4414	0.181235	10.7674	0.413613	10.769	0.125623	0.533776	Mnn1,Nuf2,Sem1
2L:7121641-7126761	126.375	111.533	0.180245	14.8424	0.486336	14.8435	0.124936	0.666186	Pvf3
2L:7136517-7140788	166.632	102.357	0.703054	64.2749	0.935802	64.2787	0.48732	2.74578	Pvf3
2L:7182205-7182867	335.353	707.241	-1.07652	371.888	0.99285	-371.89	-0.746188	4.94063	MICU1
2L:7205994-7207012	84.4707	91.0255	-0.107819	6.55476	0.267099	-6.55565	-0.0747345	0.310745	CG13784
2L:7219020-7219995	612.166	782.92	-0.354941	170.754	0.84173	-170.754	-0.246027	1.84345	CG13784,mEFG1,asRNA:CR44989
2L:7220676-7222985	174.645	121.079	0.528475	53.5658	0.894504	53.5684	0.366311	2.24908	CG13784,Ndae1,mEFG1,asRNA:CR44989
2L:7229810-7230472	151.789	178.124	-0.230814	26.3349	0.637405	-26.336	-0.159988	1.01447	Ndae1
2L:7230509-7232362	157.645	146.4	0.106765	11.2451	0.350102	11.2456	0.0740037	0.43094	Ndae1,CG43800
2L:7246513-7248707	141.032	94.6852	0.574816	46.3472	0.885089	46.3508	0.398432	2.1636	Ndae1
2L:7389700-7392956	66.2435	70.0101	-0.0797837	3.76658	0.165115	-3.76742	-0.0553019	0.180461	gudu,CG5160
2L:7414188-7416307	204.366	195.257	0.0657814	9.10906	0.250407	9.10929	0.0455962	0.288225	chm
2L:7419180-7421525	141.833	115.241	0.299542	26.5922	0.700305	26.5939	0.207627	1.20499	chm
2L:7421826-7423785	152.753	243.378	-0.671993	90.6243	0.951654	-90.6268	-0.46579	3.02937	chm,lncRNA:CR43857
2L:7427263-7429784	121.334	68.7542	0.819466	52.58	0.92112	52.5863	0.568011	2.53982	CG5958,muc
2L:7478689-7479967	18.5464	49.4801	-1.41571	30.9337	0.820534	-30.9661	-0.981295	1.71777	Ziz
2L:7497033-7498086	87.115	154.167	-0.823505	67.0524	0.946107	-67.0575	-0.57081	2.92075	Obp28a,Ziz,RapGAP1
2L:7499333-7500375	48.5245	106.824	-1.13845	58.2997	0.94229	-58.3108	-0.789115	2.85233	RapGAP1
2L:7504813-7507832	193.238	142.997	0.434396	50.2412	0.859924	50.2431	0.301101	1.96557	RapGAP1
2L:7510627-7513843	93.7183	72.4616	0.371113	21.2567	0.67631	21.2599	0.257236	1.12797	RapGAP1
2L:7522541-7524513	158.813	127.239	0.319783	31.5735	0.743639	31.5751	0.221657	1.36117	RapGAP1
2L:7527034-7530195	112.68	112.29	0.00500144	0.389956	0.0174555	0.389988	0.00346674	0.0176096	RapGAP1
2L:7641948-7642628	128.718	242.376	-0.913033	113.658	0.976896	-113.662	-0.632867	3.76774	Slob
2L:7643657-7646107	201.94	294.108	-0.542422	92.1685	0.928295	-92.1701	-0.375978	2.6352	Slob
2L:7648345-7651250	255.751	128.431	0.99374	127.319	0.982774	127.323	0.688808	4.06131	Slob
2L:7655185-7656063	234.677	167.856	0.483449	66.8205	0.897863	66.8223	0.335101	2.28144	Slob
2L:7665906-7673054	113.741	107.906	0.0759825	5.83541	0.224936	5.8359	0.0526671	0.25481	Myo28B1,Slob
2L:7785602-7787179	22.2523	79.7043	-1.8407	57.452	0.943511	-57.4814	-1.27588	2.87372	Brd7-9,CG7149
2L:7789377-7791217	277.566	216.744	0.356835	60.8214	0.834351	60.8225	0.247339	1.79789	CG7149,LKRSDH
2L:7798122-7799803	121.512	130.353	-0.101331	8.84154	0.304504	-8.84212	-0.0702376	0.36313	Herp,r2d2
2L:7802571-7803850	90.2249	104.722	-0.214962	14.4967	0.505827	-14.4983	-0.149	0.70487	r2d2,Cdc14
2L:7804878-7805438	206.592	259.64	-0.329728	53.0479	0.804046	-53.0489	-0.22855	1.62987	Cdc14
2L:7805554-7808985	260.474	262.988	-0.0138597	2.51437	0.0536387	-2.51441	-0.00960679	0.0551308	Cdc14
2L:7820307-7821631	209.201	213.243	-0.0276107	4.04229	0.116438	-4.04239	-0.0191383	0.123793	CG7115,LanB1,asRNA:CR45008
2L:7825888-7826836	98.415	215.322	-1.12954	116.907	0.984453	-116.912	-0.78294	4.16388	mts,Rack1,CG7115
2L:7911963-7915058	187.345	117.786	0.669536	69.5597	0.937913	69.5629	0.464087	2.77923	Snoo
2L:7923658-7924953	96.3248	130.294	-0.435797	33.9697	0.808906	-33.9725	-0.302072	1.65499	Snoo
2L:8035957-8037299	114.677	114.752	-0.000945029	0.0751428	0.00363868	-0.0751488	-0.000655044	0.00364531	CG7367,Cka
2L:8041819-8042406	212.206	426.633	-1.00753	214.427	0.98916	-214.429	-0.698365	4.52454	CCDC53,RpL36A,Cka,snoRNA:Psi28S-2648
2L:8043806-8045163	186.815	126.721	0.559952	60.0937	0.91117	60.0963	0.388129	2.42104	RpL36A,Megf8
2L:8045371-8047103	146.536	125.507	0.223486	21.0289	0.593588	21.0301	0.154909	0.900387	Megf8
2L:8049033-8051282	154.833	126.05	0.296709	28.7823	0.714478	28.7838	0.205663	1.25344	Megf8
2L:8063769-8066627	108.679	87.2644	0.31661	21.4148	0.662824	21.4171	0.219458	1.08715	poe
2L:8069049-8070278	67.4041	93.8389	-0.477349	26.4348	0.754326	-26.4391	-0.330873	1.40375	poe
2L:8078081-8079404	57.051	137.736	-1.27158	80.6849	0.970763	-80.6949	-0.881393	3.53233	Mcr
2L:8079622-8081100	120.067	127.871	-0.0908495	7.80402	0.273893	-7.80455	-0.0629721	0.320058	Mcr
2L:8119259-8121384	228.741	133.822	0.773399	94.919	0.962748	94.9222	0.536079	3.29005	mon2
2L:8121812-8125126	70.0477	64.6557	0.115561	5.39204	0.233079	5.39328	0.0801008	0.265371	mon2,CG8673,CG12375
2L:8131325-8133621	146.084	137.113	0.0914329	8.97102	0.290458	8.97149	0.0633765	0.343136	CG8668,PAPLA1
2L:8134756-8136225	113.674	169.74	-0.578432	56.0668	0.90855	-56.0697	-0.400939	2.39196	CG8668,PAPLA1
2L:8142731-8144824	112.92	89.3077	0.338448	23.6126	0.696107	23.615	0.234594	1.19108	PAPLA1,CG42762,CG42763,CG43394
2L:8154261-8158601	92.2814	81.6038	0.177403	10.6776	0.411578	10.6791	0.122967	0.53031	PAPLA1,CG43394
2L:8159074-8160123	331.793	355.346	-0.0989403	23.5528	0.367583	-23.553	-0.0685802	0.458206	PAPLA1,Rbsn-5,CG43394
2L:8160387-8161412	160.507	167.817	-0.0642509	7.30981	0.213639	-7.31009	-0.0445353	0.240339	PAPLA1,Acbp1,Rbsn-5
2L:8195231-8196921	125.201	129.278	-0.0462295	4.07688	0.15285	-4.07715	-0.0320438	0.165877	CG8475,CG8460,asRNA:CR44116
2L:8197900-8201700	117.499	144.349	-0.296912	26.85	0.702137	-26.8516	-0.205803	1.21112	CG8475,CG8460,PGAP5,SLC5A11,asRNA:CR44116,asRNA:CR44119
2L:8212660-8214166	145.271	302.468	-1.05804	157.197	0.988168	-157.201	-0.733375	4.43694	Ssb-c31a,CG8372,CG8360,CG8353
2L:8255213-8256494	155.611	150.353	0.0495907	5.25801	0.171883	5.25824	0.0343736	0.188601	CG8086
2L:8275804-8277710	235.718	164.021	0.523178	71.6966	0.912595	71.6985	0.362639	2.43721	Btk
2L:8304001-8304979	109.34	176.552	-0.69128	67.2128	0.937481	-67.2163	-0.479159	2.77228	Scgalpha,CG7840
2L:8309908-8312544	167.769	209.398	-0.319772	41.6289	0.777354	-41.6302	-0.221649	1.50217	Mettl14,CG7810,CG7806
2L:8316245-8319678	98.1127	90.2504	0.120507	7.8623	0.307201	7.86322	0.0835288	0.367015	CG7806,strat,mtsh
2L:8322797-8326619	72.8776	79.1579	-0.119259	6.28033	0.263639	-6.28146	-0.0826637	0.306034	CG7781,CG14275
2L:8366792-8368724	162.254	115.069	0.495757	47.1852	0.874529	47.1878	0.343633	2.07568	Pp2A-29B
2L:8368857-8370046	136.187	188.67	-0.470282	52.4836	0.877455	-52.4857	-0.325974	2.09928	CG17292,Pp2A-29B,asRNA:CR45341
2L:8374665-8375163	110.211	241.121	-1.12949	130.91	0.986641	-130.915	-0.782901	4.31558	CG17292,Wdr82,CG13390
2L:8376860-8379758	60.9964	62.1963	-0.0281039	1.19987	0.0541221	-1.2002	-0.0194801	0.0556418	AlaRS,CG13390,CG17294
2L:8380805-8381272	3.93838	96.1174	-4.60912	92.179	0.981221	-92.2942	-3.1948	3.97504	AlaRS,CG13392
2L:8381338-8383335	205.873	187.072	0.138162	18.8012	0.459211	18.8017	0.0957667	0.614726	AlaRS,CG13392,Rcd4,Dad1
2L:8400948-8403288	147.422	160.215	-0.120057	12.7929	0.382875	-12.7935	-0.0832172	0.482684	fy,emb,CG13386,CG31898,lncRNA:CR44991
2L:8404184-8404891	76.6472	276.529	-1.85113	199.882	0.997023	-199.89	-1.2831	5.81681	fy,emb,lncRNA:CR44991
2L:8405524-8407339	145.06	146.837	-0.017566	1.77702	0.067888	-1.77711	-0.0121758	0.0703023	emb
2L:8407800-8410383	44.4847	81.3117	-0.870154	36.827	0.861654	-36.8373	-0.603145	1.978	CG13397,emb
2L:8413166-8413873	50.2004	120.719	-1.26588	70.5183	0.961628	-70.5296	-0.87744	3.26044	CG13398
2L:8413953-8414661	205.467	176.483	0.219383	28.9848	0.634784	28.9856	0.152065	1.00727	CG13398
2L:8416777-8420148	187.685	134.783	0.477679	52.9024	0.880916	52.9045	0.331102	2.12793	Akap200
2L:8423467-8425246	280.841	179.532	0.645508	101.308	0.952952	101.31	0.447432	3.05658	Akap200
2L:8426954-8429083	117.931	89.4289	0.399133	28.5024	0.759542	28.5052	0.276658	1.42521	Akap200
2L:8437767-8438579	205.216	467.627	-1.18822	262.411	0.9943	-262.414	-0.82361	5.16733	mus201,D12,Chrac-14
2L:8464641-8465308	59.7849	221.287	-1.88807	161.502	0.995344	-161.513	-1.30871	5.36949	Agpat2,prg
2L:8468263-8470662	108.734	97.3226	0.15996	11.4116	0.413359	11.4128	0.110876	0.533342	dachs
2L:8484076-8486773	101.819	118.042	-0.213287	16.2225	0.532723	-16.2239	-0.147839	0.760832	dachs,lncRNA:CR43604
2L:8489233-8491653	126.448	179.472	-0.505216	53.0242	0.888753	-53.0267	-0.350189	2.196	CG13088,Dh31,dachs,CG43400
2L:8570044-8573427	164.811	90.1988	0.869631	74.612	0.956056	74.6171	0.602782	3.12484	Sema1a,tRNA:Phe-GAA-1-3
2L:8604708-8606415	445.882	291.237	0.61447	154.645	0.953893	154.647	0.425918	3.07679	Sema1a
2L:8609461-8612178	326.802	285.276	0.196059	41.526	0.624682	41.5265	0.135897	0.979981	Sema1a
2L:8612302-8614955	203.032	143.153	0.504147	59.8787	0.897201	59.8809	0.349448	2.27498	Sema1a
2L:8623837-8625333	87.4044	165.296	-0.919277	77.8919	0.960636	-77.8973	-0.637194	3.23491	Sema1a
2L:8672340-8676413	88.1863	80.3126	0.134927	7.87363	0.31369	7.87478	0.0935242	0.376425	Glt,Sema1a,CG9287
2L:8682812-8685751	78.7509	77.9463	0.0148157	0.804589	0.0337405	0.804726	0.0102694	0.0343228	CG9289,PrBP,tRNA:Asp-GTC-1-9,tRNA:Asp-GTC-1-8,Trs23
2L:8689057-8690594	112.912	86.7852	0.379673	26.1264	0.732723	26.1292	0.263169	1.31947	Hnf4
2L:8709636-8711805	54.7716	86.5963	-0.660877	31.8247	0.820992	-31.8316	-0.458085	1.72033	raw,Hnf4
2L:8751828-8753355	118.202	113.153	0.0629834	5.04929	0.185293	5.04968	0.0436568	0.204926	CG12438,CG45307
2L:8782048-8784820	137.18	81.3987	0.752988	55.7809	0.925344	55.786	0.521931	2.59486	LManVI,CG42710
2L:8793739-8800509	121.518	93.9982	0.370467	27.52	0.742163	27.5225	0.256788	1.35543
2L:8810735-8814546	121.738	95.3635	0.352266	26.3741	0.7243	26.3765	0.244172	1.28844
2L:8821162-8823594	163.588	177.498	-0.11774	13.9105	0.391679	-13.911	-0.0816113	0.497053
2L:8827023-8828034	204.539	283.168	-0.469283	78.6292	0.90145	-78.6306	-0.325282	2.3172	SoxN
2L:8829763-8833995	106.407	72.043	0.562661	34.3638	0.831578	34.3684	0.390007	1.78128	SoxN
2L:8834639-8838098	152.244	119.609	0.34806	32.635	0.766947	32.6369	0.241256	1.45649
2L:8849303-8851438	138.635	135.489	0.0331139	3.14582	0.107023	3.14599	0.0229528	0.113194	lncRNA:CR45365
2L:8868908-8872309	89.2161	52.0483	0.777452	37.1678	0.861145	37.1759	0.538889	1.97433	lncRNA:CR44414
2L:8941080-8943113	132.298	121.264	0.12564	11.0339	0.377354	11.0347	0.0870867	0.473777	Argl,CG9515,C1GalTA
2L:8995145-8996950	41.5941	92.6154	-1.15487	51.0213	0.924911	-51.0344	-0.800498	2.58908	alien,CG17906,CG18661
2L:8998561-8999766	213.002	209.461	0.0241877	3.54136	0.0871247	3.54144	0.0167657	0.091156	Try29F,CG18661
2L:9163401-9166093	117.2	116.293	0.0112111	0.90723	0.036743	0.907299	0.00777096	0.037435	CG13108,CG9586,tai,CG32982
2L:9241474-9244648	113.306	75.6927	0.582002	37.6136	0.851349	37.6181	0.403413	1.90615	tai
2L:9271292-9273128	261.119	474.104	-0.860495	212.985	0.982392	-212.987	-0.59645	4.03939	Ggamma30A
2L:9305282-9308460	133.639	117.451	0.186282	16.188	0.514911	16.189	0.129121	0.723423	lncRNA:CR42844
2L:9348384-9350831	119.473	89.3478	0.419185	30.1256	0.778957	30.1285	0.290557	1.5094	CG13110,CG43350,lncRNA:CR44802
2L:9457034-9460434	99.7494	95.2826	0.0660952	4.46679	0.181679	4.46728	0.0458137	0.200501	numb
2L:9461065-9461551	53.5617	129.329	-1.27177	75.7672	0.966514	-75.7779	-0.881524	3.39663	numb
2L:9461773-9462755	37.6811	141.03	-1.90409	103.349	0.985623	-103.366	-1.31981	4.24215	numb
2L:9492236-9492649	231.645	170.483	0.442286	61.1618	0.878957	61.1634	0.306569	2.11161	Gdi
2L:9515427-9518153	123.72	67.0371	0.884045	56.6827	0.933003	56.6896	0.612773	2.7031	CG33298
2L:9518382-9519557	92.0716	120.384	-0.386813	28.3122	0.754911	-28.3149	-0.268118	1.40613	CG33298
2L:9530359-9531781	210.069	248.571	-0.242797	38.5023	0.685522	-38.5031	-0.168294	1.15684	CG31883,Oatp30B
2L:9537908-9539572	84.1301	93.6104	-0.154047	9.4803	0.365674	-9.48155	-0.106777	0.455193	Oatp30B,CG17855
2L:9552160-9553727	97.6427	106.867	-0.130231	9.22422	0.346361	-9.22514	-0.0902694	0.425201	jp
2L:9555494-9556723	164.632	221.309	-0.426814	56.6765	0.869415	-56.6781	-0.295845	2.03573	jp
2L:9559664-9562437	148.937	153.467	-0.04322	4.52935	0.14257	-4.52956	-0.0299578	0.153816	jp
2L:9567835-9568194	40.0103	446.504	-3.48023	406.494	0.999822	-406.509	-2.41231	8.63307	brwl,lncRNA:CR44149
2L:9571373-9572850	118.148	142.021	-0.265504	23.8725	0.660458	-23.874	-0.184033	1.08016	Mtpalpha,brwl
2L:9613559-9615144	549.885	453.981	0.276498	95.9041	0.767226	95.9045	0.191654	1.45769	gcm2,Trx-2
2L:9616528-9618377	90.0916	135.809	-0.592116	45.7175	0.885852	-45.7214	-0.410424	2.17026	GlcAT-S,Trx-2
2L:9620123-9622096	115.582	90.1832	0.357991	25.3992	0.719796	25.4017	0.248141	1.27224	GlcAT-S
2L:9622380-9625193	76.843	38.9348	0.980853	37.9082	0.869389	37.9209	0.679876	2.03553	GlcAT-S,CG31882
2L:9637827-9638828	204.018	360.878	-0.822815	156.86	0.977125	-156.862	-0.570332	3.7777	Apoltp
2L:9697421-9699430	158.745	256.626	-0.692957	97.8812	0.956641	-97.8836	-0.480322	3.13825	Pka-C1,hoip
2L:9700057-9701942	136.792	101.429	0.431518	35.3633	0.81341	35.3659	0.299105	1.67884	Pka-C1,pelo,CG31710,hoip
2L:9704515-9707565	146.136	90.4482	0.692153	55.6882	0.920967	55.6925	0.479764	2.53789	pelo,CG31710
2L:9709608-9710628	106.772	104.942	0.0249342	1.82948	0.0691603	1.82965	0.0172831	0.0716682	pelo,Nckx30C,CG4364
2L:9712080-9713574	213.263	185.708	0.199599	27.5552	0.600204	27.556	0.138352	0.9168	Nckx30C,CG4364
2L:9720477-9722521	157.893	85.7242	0.88117	72.1685	0.95458	72.1739	0.610781	3.09181	Nckx30C
2L:9728799-9729869	66.1133	105.514	-0.67442	39.4005	0.867964	-39.4063	-0.467472	2.02468	Nckx30C,CG13116
2L:9732131-9733421	21.1634	75.9538	-1.84355	54.7904	0.937303	-54.8214	-1.27785	2.76944	Nckx30C
2L:9742207-9743326	168.693	184.678	-0.130618	15.9857	0.424885	-15.9863	-0.0905374	0.553186	Nckx30C
2L:9762570-9765499	77.4133	109.209	-0.496439	31.7958	0.806794	-31.7996	-0.344105	1.644	Taf11,ppk18,zf30C,und
2L:9770060-9772777	102.372	57.9945	0.819826	44.377	0.896514	44.3846	0.56826	2.26832	CG17633,ppk16,ppk11,ppk18
2L:9783233-9785530	36.8748	63.878	-0.792686	27.0033	0.7743	-27.0149	-0.549448	1.48855	IP3K1
2L:9790123-9792920	92.5284	162.847	-0.815547	70.3184	0.94944	-70.3232	-0.565294	2.9846	CG4036,CG13123,nAChRalpha6,hpRNA:CR18854
2L:9888995-9889996	80.7436	128.716	-0.672774	47.9726	0.901349	-47.9773	-0.466331	2.31616	Fkbp59,CG4537,CG34183
2L:9891224-9891955	202.342	123.192	0.715889	79.1502	0.949898	79.1534	0.496216	2.9937	CG4537,mtDNA-helicase,CG34183
2L:9895282-9896162	336.223	639.512	-0.927553	303.289	0.987379	-303.291	-0.642931	4.3724	RpS2,Bka,snoRNA:Me18S-A1576,snoRNA:Me18S-G1620,snoRNA:U14:30Ea,Uhg2
2L:9913156-9913849	56.1381	214.74	-1.93554	158.602	0.99514	-158.614	-1.34161	5.32671	Srp54,Etl1
2L:9914511-9915674	324.32	176.162	0.880516	148.158	0.980051	148.161	0.610327	3.91457	Srp54,yip2
2L:9936567-9939883	216.492	130.857	0.726326	85.6355	0.955573	85.6386	0.503451	3.1139	CG4619,CG5853,CG31712,Datp,asRNA:CR45007
2L:9945452-9946664	204.22	148.588	0.458809	55.6322	0.879415	55.6341	0.318022	2.1154	CG5853
2L:9951913-9953681	123.966	104.092	0.252078	19.8734	0.609262	19.875	0.174727	0.939718	CG13126,CG4709,lncRNA:CR45949
2L:9959026-9961760	89.6653	82.0517	0.128018	7.61367	0.306667	7.61474	0.0887351	0.366244	CG4658,CG5850,asRNA:CR43683,asRNA:CR44872
2L:9962288-9963627	348.397	177.688	0.971382	170.708	0.986234	170.711	0.673311	4.28556	Dref,CG5850,asRNA:CR43683
2L:9986789-9988891	118.899	74.7946	0.668729	44.1043	0.888219	44.1093	0.463528	2.19121	bib
2L:10004117-10006566	124.826	191.248	-0.61552	66.4214	0.928422	-66.4242	-0.426646	2.63697	Ndf,asRNA:CR44873
2L:10011232-10011814	205.098	233.01	-0.184078	27.9119	0.565522	-27.9125	-0.127593	0.833609	Trp1
2L:10019550-10022399	120.971	61.8769	0.96719	59.0943	0.940738	59.1022	0.670405	2.82579
2L:10028669-10031991	143.363	77.0977	0.894916	66.2656	0.948982	66.2716	0.620309	2.97558	obst-B,CG13127
2L:10058644-10059813	143.437	100.354	0.515318	43.0829	0.865903	43.086	0.357191	2.00919	Pen
2L:10078027-10081872	141.928	83.9648	0.757301	57.963	0.929593	57.968	0.524921	2.65346	CG44153
2L:10083475-10086529	157.672	61.1228	1.36714	96.5488	0.98112	96.5585	0.947629	3.96963	CG44153
2L:10102348-10105862	127.761	78.085	0.71033	49.676	0.909338	49.6811	0.492363	2.40062	CG34109,CG44153
2L:10146129-10149432	101.549	42.6237	1.25245	58.9256	0.944478	58.9389	0.868134	2.89098	CG4839,CG44153
2L:10182782-10184998	188.052	164.909	0.189464	23.1433	0.567659	23.1441	0.131326	0.838541	Sur
2L:10190298-10191283	180.427	94.2639	0.936639	86.1632	0.967812	86.1683	0.649228	3.43615	Sur,Fum4
2L:10193407-10195493	85.1565	53.4171	0.672815	31.7394	0.820865	31.7465	0.46636	1.71962	Sur
2L:10207929-10210119	89.7954	106.648	-0.248147	16.8529	0.56944	-16.8547	-0.172002	0.842669	Snx17,CG5731,CG5727,lncRNA:CR44845
2L:10211948-10213653	221.384	139.903	0.662129	81.4816	0.945496	81.4843	0.458953	2.90948	Npc1a,ath
2L:10215257-10216954	145.766	125.488	0.2161	20.2776	0.586387	20.2788	0.149789	0.882824	Npc1a
2L:10223350-10224980	107.595	127.931	-0.249752	20.3357	0.613893	-20.3373	-0.173115	0.951641	Bcs1,CG5708,Prosalpha6
2L:10233693-10234300	26.7194	190.781	-2.83596	164.062	0.995929	-164.086	-1.96574	5.50381	eEF1delta,mthl15
2L:10241378-10242506	119.291	162.523	-0.446159	43.2319	0.85	-43.2342	-0.309254	1.89712	me31B,chico,asRNA:CR44995
2L:10242799-10245012	232.029	139.348	0.735615	92.6811	0.959771	92.684	0.509889	3.21317	me31B,chico,asRNA:CR44995
2L:10247933-10249117	286.772	256.952	0.158403	29.8196	0.529109	29.8201	0.109797	0.75313	bsk,chico
2L:10250490-10251433	488.351	488.659	-0.00091035	0.30825	0.0121374	-0.308251	-0.000631006	0.0122117	bsk,Ror,CG31717
2L:10253407-10254892	136.444	119.153	0.19549	17.2906	0.537812	17.2917	0.135503	0.771783	Ror,CG5676
2L:10262149-10263052	126.432	158.261	-0.323941	31.8287	0.745089	-31.8303	-0.224539	1.36684	Rsf1
2L:10265856-10269515	87.951	62.6183	0.490115	25.3327	0.744224	25.3374	0.339722	1.36345	REPTOR-BP,CG4953,CG4957,Mob3,Mulk
2L:10282052-10284853	227.401	201.238	0.176338	26.1634	0.561145	26.1639	0.122228	0.823586	Ufd4
2L:10288422-10289374	40.78	108.973	-1.41803	68.1928	0.959898	-68.2075	-0.982907	3.21633	Ufd4
2L:10295346-10297070	137.756	213.674	-0.633302	75.9186	0.936997	-75.9213	-0.438971	2.76458	Hand,CYLD,asRNA:CR44968
2L:10303812-10305074	63.1619	85.6503	-0.439404	22.4884	0.70402	-22.4927	-0.304572	1.21746	nmd,CG5390
2L:10307291-10310272	128.048	177.662	-0.47245	49.614	0.872621	-49.6163	-0.327477	2.06059	Cdk5alpha,CG5390,CG4968,l(2)SH0834
2L:10313378-10315581	254.633	350.151	-0.459555	95.5175	0.904453	-95.5186	-0.318539	2.34814	Usp14,CG4972
2L:10326497-10328017	72.4323	87.0467	-0.265156	14.6144	0.536718	-14.6168	-0.183792	0.769418	RnrL,Schip1
2L:10336279-10337586	268.661	248.948	0.109942	19.7129	0.39084	19.7132	0.0762062	0.495674	GATAd
2L:10339600-10341279	43.3138	91.3837	-1.07711	48.0699	0.91598	-48.082	-0.746597	2.4767	SamDC,GATAd,CG31715
2L:10358374-10359147	40.7471	193.562	-2.24802	152.815	0.994936	-152.831	-1.55821	5.28567	Cand1,ClpP
2L:10359293-10359935	75.0726	210.515	-1.48756	135.442	0.991196	-135.451	-1.0311	4.73254	Cand1
2L:10360343-10361326	158.664	237.571	-0.582388	78.9075	0.930814	-78.9096	-0.403681	2.67096	Cand1
2L:10368884-10369849	175.32	165.059	0.0870125	10.2614	0.303333	10.2618	0.0603125	0.361448	CG5056,rho-5
2L:10371168-10372922	220.175	162.362	0.439437	57.8129	0.875115	57.8146	0.304594	2.08036	rho-5,CG33303
2L:10379103-10380281	66.4205	269.424	-2.02018	203.004	0.997226	-203.014	-1.40028	5.88763	dpr19,gny
2L:10385557-10389559	146.197	126.734	0.206116	19.4636	0.568372	19.4646	0.142869	0.84019	Cdk1,CG5096,mRpS7,da
2L:10389701-10391871	101.721	89.3026	0.187837	12.4179	0.455318	12.4193	0.130198	0.607553	asRNA:CR45789,da
2L:10393472-10394097	197.749	570.112	-1.52758	372.363	0.99827	-372.366	-1.05883	6.35947	Mdh1,asRNA:CR45789,da
2L:10394625-10395123	258.369	520.068	-1.00927	261.7	0.990127	-261.701	-0.699572	4.61797	Mdh1
2L:10399088-10400632	151.97	122.975	0.305421	28.995	0.723003	28.9966	0.211702	1.28375	Cnot4
2L:10408739-10409737	263.916	248.256	0.0882515	15.6602	0.327226	15.6605	0.0611713	0.396347	RpS27A,Ip259,CG5355,Ir31a
2L:10412746-10415073	67.2182	128.85	-0.938767	61.6316	0.9443	-61.6388	-0.650704	2.88778	CG5355,Klp31E
2L:10420716-10423504	71.6069	108.97	-0.605762	37.3632	0.853104	-37.3681	-0.419882	1.91803	pie,RfC3,Wdfy2
2L:10423634-10426120	161.468	166.484	-0.0441296	5.01536	0.147405	-5.01556	-0.0305883	0.15947	pie,Wdfy2,SmB,KdelR
2L:10427319-10427897	43.6005	259.354	-2.57251	215.754	0.997964	-215.769	-1.78313	6.19695	CG5188,SmB,KdelR
2L:10429222-10429904	93.9876	208.434	-1.14905	114.446	0.984173	-114.452	-0.79646	4.14604	CG5188,Bug22,KdelR
2L:10431788-10432506	45.5066	203.714	-2.1624	158.207	0.995369	-158.222	-1.49886	5.37497	TfIIB,Bug22,TBC1D16
2L:10433958-10434958	28.2999	115.641	-2.03078	87.341	0.97827	-87.3646	-1.40763	3.82905	TfIIB,TBC1D16
2L:10479532-10482752	95.1267	84.3056	0.174223	10.8211	0.408728	10.8226	0.120762	0.525479	Grip75,RluA-2
2L:10485482-10486843	173.519	152.754	0.183883	20.765	0.538855	20.7658	0.127458	0.774043	Grip75,Cog4
2L:10487112-10488544	45.9763	64.7266	-0.493469	18.7503	0.648601	-18.7568	-0.342047	1.04583	Cog4,CG6144
2L:10516011-10518367	162.911	188.726	-0.212213	25.8154	0.607812	-25.8163	-0.147095	0.936013	Lrr47,Fatp1
2L:10518375-10520117	142.325	164.228	-0.206512	21.9031	0.587125	-21.9041	-0.143143	0.88461	Lrr47
2L:10575566-10578184	58.0066	99.3798	-0.776737	41.3733	0.882316	-41.3806	-0.538393	2.13975	w-cup,Trim9
2L:10582332-10588190	120.716	112.334	0.103825	8.38222	0.296743	8.38287	0.0719661	0.352033	Trim9,CG34161
2L:10731116-10731919	337.818	238.282	0.503578	99.5363	0.91972	99.5376	0.349054	2.52224	CG6443,CG17118,EMC3,Dpy-30L1
2L:10732314-10733411	206.919	302.452	-0.547638	95.5327	0.932443	-95.5343	-0.379594	2.69478	Nup107,CG17118,EMC3,Dpy-30L1
2L:10733818-10735689	14.7939	101.615	-2.78004	86.8213	0.978372	-86.8658	-1.92698	3.83374	Nup107,Dpy-30L1,Vha16-5
2L:10737735-10739301	160.64	297.833	-0.890668	137.192	0.979618	-137.195	-0.617364	3.89312	Vha16-5,CG12299
2L:10741326-10743017	223.989	289.753	-0.371399	65.7647	0.844351	-65.7657	-0.257434	1.86015	CG12299,CG6729,mir-4970
2L:10765939-10767061	139.419	195.751	-0.489596	56.3323	0.890178	-56.3344	-0.339362	2.2089	Ubc2,CG6495
2L:10773482-10774980	122.044	90.3335	0.434074	31.711	0.792366	31.7139	0.300877	1.57198	CG31869
2L:10818548-10822992	75.8489	49.5387	0.614574	26.3103	0.762646	26.3175	0.42599	1.4382	Nos,CG6508,CG17134
2L:10837480-10839663	113.983	167.393	-0.55442	53.41	0.898066	-53.4129	-0.384295	2.28343	Nos,CG6700,mir-4987
2L:10846705-10848396	83.3368	125.733	-0.59334	42.3964	0.874198	-42.4006	-0.411272	2.07305	porin,Porin2
2L:10857389-10857892	279.565	470.045	-0.749617	190.48	0.974122	-190.482	-0.519595	3.65437	aurB,Stam,Dnz1
2L:10858756-10860182	101.121	99.8494	0.0182602	1.27183	0.0542748	1.27196	0.012657	0.0558032	aurB,Stam
2L:10922561-10925026	190.046	188.662	0.0105438	1.38387	0.0467684	1.38391	0.00730842	0.0478974	dpr2
2L:10968382-10969388	129.868	168.962	-0.379647	39.0934	0.809211	-39.0952	-0.263151	1.65659	CG33129
2L:10973979-10975278	57.1207	66.0817	-0.210236	8.96096	0.37257	-8.96343	-0.145725	0.466123	abo,ATPsynG,CG16743
2L:10976881-10980519	148.311	83.1197	0.835359	65.1909	0.945522	65.1962	0.579027	2.90995	ATPsynG,SCAR
2L:10987980-10988971	97.8546	136.051	-0.475441	38.1969	0.838601	-38.1999	-0.329551	1.82387	piwi,TTLL4A,CG12253
2L:10990124-10990561	27.0082	164.473	-2.60638	137.465	0.993359	-137.49	-1.80661	5.01446	TTLL4A,CG12253
2L:10992123-10994027	71.2071	83.1157	-0.223099	11.9085	0.457761	-11.9106	-0.15464	0.612048	TTLL4A
2L:10998913-11000177	68.8052	89.5342	-0.379921	20.729	0.670814	-20.7325	-0.263341	1.11113	aub
2L:11005502-11006539	295.63	150.239	0.976532	145.391	0.984682	145.394	0.676881	4.17872	Nup154
2L:11031134-11033086	111.504	95.6368	0.221452	15.8668	0.535725	15.8683	0.153499	0.767279	Samuel
2L:11036106-11038896	158.42	95.4663	0.730688	62.9533	0.936616	62.9576	0.506474	2.75854	Samuel,CG18666
2L:11076962-11079736	137.159	52.0019	1.39922	85.1574	0.975115	85.1689	0.969863	3.69347	AstC,CG43725
2L:11083903-11084882	135.191	99.6448	0.440135	35.5464	0.817506	35.5491	0.305078	1.70104	AstCC
2L:11088375-11089557	319.442	286.204	0.15851	33.2379	0.533995	33.2383	0.109871	0.763559	CG16854
2L:11093069-11095700	71.4122	75.8416	-0.0868192	4.42942	0.190738	-4.43027	-0.0601785	0.211632	Wdr59,Ge-1
2L:11095838-11097877	116.016	74.5552	0.637942	41.4608	0.875165	41.4657	0.442188	2.08077	Wdr59,Ge-1
2L:11099285-11100750	218.875	131.137	0.739034	87.7381	0.95771	87.7412	0.512259	3.1632	Reps,Ge-1
2L:11102665-11104111	283.403	175.316	0.692897	108.087	0.959949	108.089	0.48028	3.2176	Reps
2L:11106047-11108742	74.1096	114.851	-0.632034	40.7416	0.870483	-40.7465	-0.438093	2.04395	Reps,l(2)gd1
2L:11110752-11112818	233.239	203.685	0.195469	29.554	0.605751	29.5547	0.135489	0.930772	Idua,l(2)gd1
2L:11119214-11119954	150.723	291.071	-0.949465	140.347	0.982595	-140.35	-0.658119	4.05102	CG6230,Dnaaf4
2L:11128717-11129736	127.632	150.196	-0.234857	22.5642	0.615445	-22.5654	-0.162791	0.955669	RfC38,CG4751,Nup160
2L:11170349-11172154	154.134	111.751	0.4639	42.3833	0.850204	42.3858	0.321551	1.89848	Vm32E,Ca-beta
2L:11179406-11180463	94.6318	138.148	-0.545821	43.5165	0.87257	-43.5199	-0.378334	2.06019	Boh2,Ca-beta
2L:11190684-11193010	172.51	111.11	0.634692	61.4001	0.923969	61.4033	0.439935	2.57662	Ca-beta
2L:11198766-11200851	82.5318	81.5505	0.0172576	0.981366	0.0431043	0.981518	0.011962	0.0440609	Ca-beta
2L:11202799-11203347	479.944	181.084	1.4062	298.86	0.997328	298.863	0.974706	5.92502	Ca-beta
2L:11204899-11205504	408.917	403.663	0.0186552	5.25359	0.0913232	5.25363	0.0129308	0.0957658	lncRNA:CR43859
2L:11227913-11229267	152.923	93.7112	0.706508	59.2114	0.928957	59.2156	0.489714	2.64447	ab
2L:11244327-11247106	215.243	204.001	0.0773897	11.2419	0.28659	11.2422	0.0536425	0.337699	ab
2L:11252913-11254671	169.266	192.301	-0.184066	23.034	0.550356	-23.0348	-0.127585	0.7993	ab
2L:11268676-11269820	114.29	274.504	-1.26412	160.214	0.992188	-160.219	-0.876224	4.85213	cmet,cana
2L:11278762-11279708	40.605	152.052	-1.90484	111.447	0.988473	-111.464	-1.32033	4.46309	Ppt2,cana,CG33695,asRNA:CR44182
2L:11281363-11282575	74.8986	133.735	-0.836363	58.8361	0.935547	-58.8421	-0.579723	2.74182	mre11,Ppt2,asRNA:CR44182
2L:11282935-11285020	74.4326	57.8175	0.364429	16.6151	0.596641	16.6191	0.252603	0.907929	mre11,Osi21
2L:11512011-11513165	126.102	143.618	-0.187648	17.5163	0.529338	-17.5173	-0.130068	0.753616	Dlg5
2L:11585791-11587627	266.382	237.538	0.165342	28.8446	0.547761	28.8451	0.114606	0.793544	kek2,Mst33A,lncRNA:CR44496
2L:11610948-11612991	275.179	207.281	0.40878	67.8975	0.869618	67.8988	0.283345	2.03729	kek2,spag4
2L:11622089-11622803	150.999	450.676	-1.57755	299.676	0.998168	-299.681	-1.09347	6.30231	kek2
2L:11623071-11624950	329.477	564.848	-0.777686	235.371	0.977074	-235.372	-0.539051	3.77547	kek2
2L:11638488-11640881	222.899	267.529	-0.263308	44.6305	0.720916	-44.6313	-0.182511	1.27624
2L:11645378-11646359	85.9043	132.938	-0.629955	47.034	0.894351	-47.0383	-0.436652	2.24763	CG6614
2L:11648408-11653625	115.808	99.5219	0.218651	16.2863	0.542061	16.2878	0.151558	0.781019	CG6614,CG12307,CG4983
2L:11677875-11681533	130.317	83.1808	0.647702	47.1361	0.897023	47.1405	0.448953	2.27325
2L:11789898-11792227	116.61	65.7532	0.826557	50.8567	0.917354	50.8634	0.572926	2.49319	CG14931,CG14932,Tsp33B,CG14937
2L:11792239-11793965	155.755	215.176	-0.466238	59.4208	0.887837	-59.4227	-0.323172	2.1878	crol,Tsp33B,CG14937
2L:11795779-11798088	74.1053	127.615	-0.784146	53.5094	0.921399	-53.5152	-0.543529	2.54338	crol,snoRNA:Me18S-A934
2L:11798548-11800104	224.859	159.545	0.495053	65.3135	0.902748	65.3154	0.343145	2.33045	crol,snoRNA:Me18S-A934
2L:11800110-11801386	128.403	85.7748	0.582052	42.6281	0.87374	42.6321	0.403448	2.06942	crol
2L:11803461-11805951	321.2	382.048	-0.250282	60.8481	0.719924	-60.8486	-0.173482	1.27269	crol
2L:11807254-11808578	228.077	423.577	-0.893102	195.5	0.983511	-195.502	-0.619051	4.10509	crol
2L:11810675-11811677	217.196	235.92	-0.1193	18.724	0.4143	-18.7243	-0.0826923	0.534948	CycY
2L:11811734-11812737	117.374	237.494	-1.01678	120.121	0.982748	-120.125	-0.704782	4.05983	CycY
2L:11816822-11818107	151.42	109.54	0.467097	41.88	0.850738	41.8826	0.323767	1.90205	Pde1c
2L:11834764-11836882	121.39	108.133	0.16684	13.2568	0.454046	13.2579	0.115645	0.60522	Sfp33A2,Pde1c,Sfp33A4,CG45011,CG45012,lncRNA:CR45013,lncRNA:CR45014
2L:11847121-11848587	266.859	144.538	0.884624	122.321	0.977099	122.324	0.613175	3.77659	Mal-B1,Pde1c
2L:11850758-11851935	430.734	610.006	-0.502027	179.272	0.926972	-179.273	-0.347979	2.61691	Mal-B2,Pde1c
2L:11868995-11870859	130.094	156.489	-0.266509	26.3952	0.677939	-26.3966	-0.18473	1.13301	Pde1c
2L:11877230-11878399	143.075	137.499	0.0573454	5.57551	0.193868	5.5758	0.0397488	0.215507	Pde1c
2L:11928746-11929548	582.751	274.001	1.0887	308.75	0.992875	308.752	0.754627	4.94419	Pde1c
2L:11941626-11943753	113.858	357.557	-1.65094	243.699	0.997557	-243.704	-1.14434	6.01463	Crys
2L:11985714-11986968	161.807	107.268	0.593051	54.5387	0.907328	54.542	0.411071	2.37869	CG6686
2L:11987242-11988303	202.169	477.467	-1.23984	275.298	0.995445	-275.301	-0.85939	5.39159	CG6686,CG34163,zuc
2L:11989664-11991783	120.342	166.664	-0.469802	46.322	0.864555	-46.3244	-0.325642	1.99919	dgt2,escl,CG34163,zuc
2L:12000245-12002187	257.291	117.467	1.13114	139.824	0.987761	139.829	0.784049	4.40311	Nfs1,Hacd1,CG18787
2L:12008439-12009247	228.498	351.047	-0.619482	122.549	0.95257	-122.551	-0.429392	3.0485	Rh5
2L:12015071-12016148	214.092	150.352	0.509886	63.7398	0.903995	63.7418	0.353426	2.34335	Wdr81
2L:12018101-12019113	46.1682	101.869	-1.14174	55.7004	0.936718	-55.7121	-0.791392	2.76015	Wdr81
2L:12033706-12035701	131.675	111.212	0.243668	20.4629	0.606616	20.4644	0.168898	0.932968	dmGlut,Tom70,CG18788
2L:12036517-12038564	131.571	87.8766	0.582289	43.6942	0.877481	43.6981	0.403612	2.09949	Tom70,CG6766,CG18788
2L:12038921-12042064	81.8975	50.4783	0.698157	31.4192	0.818855	31.427	0.483925	1.70846	Tom70,CG6766,CG6785,asRNA:CR46070
2L:12046814-12048400	250.754	241.429	0.054673	9.32488	0.19626	9.32504	0.0378965	0.218479	CG6770,Plzf,lncRNA:CR44589
2L:12050907-12054241	182.606	100.965	0.854886	81.6415	0.960585	81.646	0.592562	3.23361	JhI-21,PLCXD
2L:12061853-12063667	109.169	95.0745	0.199426	14.094	0.493053	14.0954	0.138232	0.67935	Rab3-GAP,firl
2L:12098042-12100440	149.5	188.396	-0.333625	38.8962	0.778499	-38.8976	-0.231251	1.50733	Mt2,Patsas,Ced-12
2L:12101580-12102218	248.884	287.685	-0.209016	38.8009	0.63855	-38.8014	-0.144879	1.01763	Patsas,Ced-12
2L:12102353-12102926	108.145	388.566	-1.84519	280.421	0.998906	-280.427	-1.27899	6.81778	ThrRS,Patsas
2L:12106509-12108666	53.225	81.1215	-0.60798	27.8965	0.780204	-27.9031	-0.42142	1.51505	Rab6,ThrRS,Phae1
2L:12357344-12358713	268.766	160.4	0.744677	108.366	0.965369	108.369	0.516171	3.363	CG17010,bru2
2L:12369177-12371212	176.956	105.325	0.748537	71.6304	0.946794	71.6343	0.518846	2.93358	bru2
2L:12428853-12430762	259.019	198.431	0.384419	60.5879	0.847761	60.5892	0.266459	1.8823	Trm1,CG5435,SC35
2L:12432161-12432743	87.2561	170.669	-0.967871	83.4127	0.966997	-83.4183	-0.670877	3.41117	snoRNA:SC35-a,snoRNA:SC35-b,SC35
2L:12437854-12440242	108.506	72.4325	0.583064	36.0733	0.843511	36.0781	0.404149	1.85477	eRF3
2L:12450102-12452787	65.0622	67.4474	-0.0519428	2.38518	0.104122	-2.38574	-0.036004	0.109951	Oatp33Eb,CG5418,CR17024
2L:12454005-12455113	240.659	223.754	0.105077	16.905	0.384071	16.9054	0.072834	0.484624	CG5418,CR17024,bun
2L:12462816-12465358	151.928	92.9514	0.708835	58.9762	0.928626	58.9804	0.491327	2.63982	bun
2L:12469219-12469892	46.4522	57.634	-0.311171	11.1817	0.455293	-11.1861	-0.215688	0.607507	bun
2L:12471627-12474637	120.892	88.5901	0.448506	32.3023	0.801069	32.3054	0.310881	1.6148	bun
2L:12481340-12482608	236.387	142.235	0.732875	94.152	0.959415	94.1548	0.50799	3.20435	bun
2L:12538522-12540983	220.62	134.408	0.714945	86.212	0.953868	86.2149	0.495562	3.07624	bun
2L:12696036-12696932	95.7169	135.808	-0.504718	40.0907	0.85056	-40.0938	-0.349844	1.90086	PICK1,CG5781
2L:12704176-12705734	246.977	446.553	-0.854457	199.576	0.981323	-199.578	-0.592264	3.98047	CG5776,spict
2L:12707144-12709450	93.6972	113.73	-0.279541	20.0333	0.629262	-20.0352	-0.193763	0.99226	spict,CG15484,CG6180,CG5787
2L:12713666-12715716	52.4739	89.6043	-0.771969	37.1304	0.860789	-37.1385	-0.535088	1.97176	CG5787,Pih1D1
2L:12722327-12723861	117.238	130.074	-0.149903	12.8369	0.425903	-12.8378	-0.103905	0.554957	Pih1D1,MRP
2L:12738013-12739163	167.572	157.432	0.0900539	10.1402	0.302163	10.1406	0.0624206	0.35977	MRP
2L:12820017-12820986	100.57	131.797	-0.390106	31.2261	0.777557	-31.2285	-0.270401	1.50309	kek1
2L:12842329-12843480	40.5092	121.078	-1.57962	80.5692	0.972366	-80.5847	-1.09491	3.58872	lncRNA:CR44971
2L:12919087-12920507	231.798	75.5212	1.61791	156.276	0.994275	156.285	1.12145	5.16288	ACXB,ACXA
2L:12961613-12963844	153.001	201.489	-0.397159	48.4881	0.844402	-48.4897	-0.27529	1.86048
2L:12999426-13001846	91.4642	114.943	-0.32964	23.4789	0.690254	-23.4812	-0.228489	1.172	Yip1d1,Vha68-1
2L:13002064-13004100	143.919	104.213	0.465717	39.7056	0.842774	39.7083	0.32281	1.85007	mTor,Vha68-1
2L:13004487-13006386	73.1566	86.3251	-0.238792	13.1685	0.496056	-13.1706	-0.165518	0.68529	mTor,Vha68-1
2L:13007648-13008936	61.3546	82.6784	-0.430339	21.3238	0.68631	-21.3281	-0.298288	1.15935	mTor
2L:13009461-13010996	50.4681	63.2629	-0.325988	12.7948	0.503359	-12.7989	-0.225957	0.699887	mTor
2L:13011612-13012952	53.9958	95.2759	-0.819263	41.2801	0.883104	-41.2882	-0.56787	2.14647	mTor,Ube4B
2L:13013768-13015978	68.7631	92.9757	-0.435219	24.2126	0.72514	-24.2165	-0.301671	1.29149	mTor,Ube4B
2L:13023753-13024499	335.963	149.867	1.16462	186.097	0.991756	186.1	0.807256	4.79824	CG9932
2L:13024671-13026040	157.107	158.222	-0.0102003	1.11474	0.0420865	-1.11478	-0.00707033	0.0429978	CG9932
2L:13026376-13028330	166.211	102.294	0.700297	63.917	0.935344	63.9208	0.485409	2.73867	CG9932
2L:13029373-13030993	172.679	94.8921	0.863728	77.7864	0.958092	77.7912	0.598691	3.17227	CG9932
2L:13032230-13034833	249.951	136.838	0.86918	113.114	0.974962	113.117	0.60247	3.68735	CG9932
2L:13053664-13058532	167.441	277.072	-0.726605	109.631	0.964758	-109.633	-0.503644	3.34552	CG9932
2L:13107029-13108447	218.159	114.531	0.929646	103.629	0.974885	103.633	0.644381	3.68431	Ttc30
2L:13162641-13163769	80.5086	120.175	-0.57792	39.6662	0.861196	-39.6705	-0.400584	1.97469	kmg,DnaJ-H
2L:13163935-13164556	90.1603	157.224	-0.802254	67.0634	0.944962	-67.0682	-0.55608	2.89973	kmg,DnaJ-H
2L:13167583-13168316	91.8819	158.488	-0.786519	66.6059	0.943944	-66.6105	-0.545174	2.8814	Sirt1
2L:13168370-13170265	143.469	221.36	-0.625653	77.8906	0.938372	-77.8932	-0.43367	2.78663	Sirt1,Sfmbt
2L:13172025-13173715	222.652	167.95	0.406762	54.7023	0.857557	54.7039	0.281946	1.94882	Sfmbt,asRNA:CR46256
2L:13183152-13185182	169.544	159.666	0.0866096	9.8788	0.299695	9.87918	0.0600332	0.356239	Alg7,Rsph1,CG16974,Mgat3
2L:13187756-13189214	26.7303	84.3682	-1.65822	57.6379	0.943537	-57.6617	-1.14939	2.87417	CG16974
2L:13192287-13194689	98.0564	79.1146	0.309669	18.9418	0.626921	18.9444	0.214646	0.985965	CG16974,Edem2
2L:13194832-13195838	44.6324	72.3445	-0.696791	27.7121	0.781374	-27.7208	-0.482979	1.52039	Edem2
2L:13203678-13208998	159.656	92.4048	0.788931	67.2516	0.944529	67.2563	0.546845	2.8919	CG16972,Pect
2L:13209763-13211728	114.847	99.2423	0.210686	15.6047	0.523613	15.6061	0.146037	0.741525	snRNA:U2:34ABa,Pect,CG15482,kek4
2L:13217201-13221062	104.468	133.677	-0.355687	29.2088	0.751552	-29.211	-0.246544	1.39252	CG9426,mRF1,Ski6
2L:13298096-13300672	92.0228	100.294	-0.124178	8.27164	0.317074	-8.27257	-0.0860739	0.381368	CG31729
2L:13305626-13306888	82.5911	112.836	-0.450175	30.2454	0.786361	-30.2487	-0.312038	1.54347	CG16825,CG43779,hbt
2L:13371665-13372395	15.1007	96.1335	-2.67042	81.0327	0.973817	-81.0767	-1.851	3.64264	ND-B22,Bdp1
2L:13374295-13375954	244.002	143.519	0.765653	100.483	0.964835	100.486	0.530711	3.34769	Bdp1,CG6565,CG9302
2L:13377987-13379762	136.8	171.184	-0.323479	34.3839	0.756056	-34.3855	-0.224219	1.41082	beta'COP,CG9302
2L:13381189-13384045	82.04	87.7055	-0.0963394	5.66548	0.235216	-5.66629	-0.0667774	0.268162	beta'COP,loqs,asRNA:CR44599
2L:13387052-13388085	13.8072	68.8858	-2.31878	55.0786	0.938397	-55.1274	-1.60726	2.78704	Ing5,CG7099
2L:13390909-13391946	55.0723	108.27	-0.975241	53.1981	0.928041	-53.2071	-0.675986	2.63165	CG7099
2L:13425601-13427902	119.454	105.556	0.178447	13.8981	0.473003	13.8992	0.12369	0.64056	CG42784
2L:13466066-13468134	183.3	214.517	-0.226884	31.2169	0.65598	-31.2177	-0.157264	1.06705	CG42784,CG46308
2L:13486376-13487601	438.007	234.311	0.902528	203.696	0.984249	203.698	0.625585	4.15087	CG42784,CG46308
2L:13496577-13499597	170.203	98.7178	0.785871	71.4848	0.948677	71.4892	0.544724	2.96961	CG42784,CG46308
2L:13510829-13514665	233.37	114.987	1.02114	118.383	0.982468	118.387	0.707803	4.04374	B4
2L:13542938-13543644	38.517	123.027	-1.67541	84.5101	0.975751	-84.5267	-1.1613	3.71936	B4,CG16853,CG9263
2L:13632827-13635815	127.722	115.908	0.140025	11.8139	0.40028	11.8147	0.0970578	0.511292	kuz,lncRNA:CR43410
2L:13639495-13640436	24.3068	203.336	-3.06443	179.029	0.996692	-179.056	-2.1241	5.71145	ics,kuz
2L:13734115-13735959	80.6655	66.0431	0.288543	14.6224	0.542748	14.6252	0.200003	0.782521	nur
2L:13772126-13775262	137.858	99.9213	0.464315	37.9364	0.833155	37.9392	0.321839	1.79069	CG9008,TM9SF4,CG43376
2L:13775785-13778870	191.606	316.025	-0.721898	124.419	0.966209	-124.421	-0.500381	3.38755	CG9008,asRNA:CR31845
2L:13779882-13781298	193.326	262.589	-0.441772	69.2632	0.885038	-69.2646	-0.306213	2.16316	p38b,CG9008,CG16890
2L:13781457-13782919	191.312	161.312	0.246075	30.0001	0.67715	30.0011	0.170566	1.13057	p38b,CG16890
2L:13785500-13789763	90.8225	79.1714	0.19807	11.6511	0.443715	11.6527	0.137291	0.586475	Eato,asRNA:CR44847
2L:13795124-13796678	40.3628	88.4948	-1.13257	48.132	0.916718	-48.1453	-0.785036	2.48552	Sec71
2L:13815483-13816249	64.6367	118.026	-0.868673	53.3888	0.925064	-53.3959	-0.602118	2.59112	Sos
2L:13817268-13818807	270.82	216.067	0.325856	54.7531	0.805674	54.754	0.225866	1.63822	Sos
2L:13819930-13822222	169.787	87.6776	0.953446	82.1095	0.965165	82.115	0.660878	3.35714	b,Sos
2L:13825459-13827618	100.502	81.7015	0.298793	18.8007	0.621043	18.8031	0.207107	0.970333	Arpc1,PolG1
2L:13832374-13833779	93.7896	132.959	-0.503484	39.1697	0.846667	-39.1729	-0.348989	1.87514	PolG2,Orc5,Polr2C,GatC,mRpS23
2L:13835836-13836611	339.112	251.67	0.430227	87.4416	0.888906	87.4427	0.298211	2.19738	CenG1A,mRpS23
2L:13865189-13867878	118.968	94.9113	0.325921	24.0566	0.695903	24.0588	0.225911	1.19041	CenG1A,lncRNA:CR44848
2L:13868353-13870773	158.397	56.8895	1.47731	101.507	0.983766	101.518	1.02399	4.12064	CenG1A
2L:13895468-13896805	203.774	237.522	-0.221088	33.7476	0.647684	-33.7483	-0.153247	1.04323	CenG1A
2L:13899162-13899996	219.355	484.313	-1.14267	264.958	0.99341	-264.961	-0.79204	5.02215	Smg5,CenG1A
2L:13900062-13902160	116.379	177.143	-0.606088	60.7645	0.920483	-60.7675	-0.420109	2.53179	Smg5
2L:13902931-13903595	87.5877	262.649	-1.58433	175.061	0.995191	-175.068	-1.09818	5.33723	Smg5
2L:14046302-14047802	80.6144	90.0374	-0.159487	9.42298	0.370102	-9.42433	-0.110548	0.462197	nAChRalpha5,NimC4
2L:14115800-14117761	290.087	323.049	-0.155266	32.9617	0.533715	-32.962	-0.107622	0.762958	CG46301
2L:14188961-14190838	316.357	166.395	0.926945	149.963	0.982799	149.965	0.642509	4.06279	Dyrk2
2L:14205260-14208048	186.014	113.239	0.716043	72.7753	0.945445	72.7788	0.496324	2.90855	Dyrk2
2L:14229568-14233002	133.069	59.0611	1.1719	74.0082	0.963766	74.0175	0.812298	3.31775	Dyrk2
2L:14322553-14324463	48.5964	78.2856	-0.687899	29.6892	0.802239	-29.6972	-0.476815	1.6207	wb
2L:14343256-14344806	188.875	155.254	0.282806	33.6215	0.721628	33.6226	0.196026	1.2788	CG33090
2L:14351551-14353982	69.4922	80.1439	-0.205742	10.6517	0.422672	-10.6537	-0.142609	0.549344	l(2)34Fc,l(2)34Fd,CG43052
2L:14355464-14358562	160.989	102.983	0.644562	58.0066	0.920153	58.0101	0.446776	2.52764	Pgant35A,Rab14,l(2)34Fd,lncRNA:CR44851,asRNA:CR43463
2L:14359942-14361163	55.219	114.749	-1.05525	59.5304	0.943461	-59.5397	-0.731444	2.87282	Pgant35A,spel1,asRNA:CR43463
2L:14362625-14363316	82.569	211.41	-1.35637	128.841	0.989415	-128.848	-0.940166	4.54829	spel1
2L:14583940-14584783	118.981	204.518	-0.781504	85.5376	0.958779	-85.5412	-0.541697	3.1888
2L:14601234-14603404	131.569	80.9906	0.699994	50.5784	0.910458	50.5832	0.485199	2.41305	osp
2L:14603722-14605658	165.886	74.7384	1.15027	91.1475	0.975929	91.1548	0.797306	3.72674	osp
2L:14616230-14616820	12.3014	76.0608	-2.62833	63.7594	0.956031	-63.8135	-1.82182	3.12426	Adh,Adhr,osp
2L:14620703-14621763	287.355	330.533	-0.201958	43.1775	0.625878	-43.178	-0.139987	0.983173	osp
2L:14622081-14623109	543.399	481.92	0.173219	61.4793	0.567125	61.4795	0.120066	0.837306	osp
2L:14637527-14639237	330.295	162.57	1.02269	167.725	0.987812	167.728	0.708878	4.40728	osp
2L:14651551-14654371	93.2945	82.3858	0.179396	10.9087	0.416539	10.9102	0.124348	0.538778	osp
2L:14661095-14663959	115.1	113.345	0.0221634	1.7547	0.0672519	1.75484	0.0153625	0.0696201	osp
2L:14669040-14670561	237.503	126.455	0.909324	111.048	0.976412	111.052	0.630295	3.74703	osp
2L:14680516-14683879	188.211	164.471	0.194514	23.7395	0.570356	23.7403	0.134827	0.844799	osp
2L:14684980-14686258	200.49	221.071	-0.140984	20.5817	0.465802	-20.5822	-0.0977229	0.626988	osp
2L:14727054-14728281	66.7783	123.105	-0.882436	56.3265	0.93229	-56.3334	-0.611658	2.69252	CG42685
2L:14924789-14927087	77.6788	87.035	-0.164074	9.35617	0.368855	-9.35761	-0.113728	0.46022	CG3491,side-II
2L:14959973-14961186	140.945	248.673	-0.81911	107.727	0.97028	-107.73	-0.567764	3.51593	side-II
2L:15010313-15010658	47.38	251.895	-2.41047	204.515	0.997583	-204.529	-1.67081	6.0251	THG,Rnmt
2L:15164511-15166280	101.258	138.958	-0.456618	37.7004	0.832112	-37.7032	-0.316503	1.78446	CG4168
2L:15199120-15199593	66.4165	458.826	-2.78833	392.41	0.999771	-392.42	-1.93273	8.38176	CG4168
2L:15250782-15252032	138.61	131.453	0.0764823	7.15681	0.250458	7.15721	0.0530135	0.288293	dao
2L:15252193-15252894	17.8644	69.0471	-1.95049	51.1827	0.927863	-51.2199	-1.35198	2.62918	dao
2L:15263549-15265391	78.6196	109.417	-0.476881	30.7978	0.796183	-30.8015	-0.330549	1.59053	yuri,Cul3
2L:15267335-15268824	56.41	63.1742	-0.163385	6.76423	0.290254	-6.76621	-0.11325	0.342849	Cul3
2L:15501120-15502184	65.4359	83.6426	-0.354156	18.2067	0.624911	-18.2102	-0.245482	0.980592	lace
2L:15503220-15504524	43.6673	119.426	-1.45149	75.7587	0.967684	-75.7726	-1.0061	3.43221	lace
2L:15508582-15510047	359.707	267.688	0.426268	92.0186	0.89028	92.0196	0.295467	2.20982
2L:15555691-15560668	224.545	121.347	0.887871	103.198	0.973028	103.202	0.615425	3.61296	kek3
2L:15569327-15572534	112.384	183.863	-0.710193	71.4789	0.943282	-71.4824	-0.492268	2.86967	kek3
2L:15580448-15581399	501.709	536.002	-0.0953885	34.2933	0.371552	-34.2935	-0.0661183	0.464502	kek3
2L:15648495-15650198	179.47	136.084	0.39925	43.3864	0.832774	43.3882	0.276739	1.78841	stol
2L:15650336-15653367	149.44	131.831	0.180882	17.6095	0.517277	17.6104	0.125378	0.728313	stol
2L:15729646-15730654	22.7284	102.928	-2.17907	80.1997	0.973003	-80.2293	-1.51041	3.61201	CycE
2L:15752814-15753991	126.003	126.715	-0.00812348	0.711498	0.0302545	-0.711544	-0.00563077	0.0307216	Mtr4
2L:15754072-15756378	121.44	154.942	-0.351478	33.5014	0.770941	-33.5032	-0.243626	1.47378	Mtr4,Gli
2L:15763674-15765911	102.849	96.133	0.0974306	6.71646	0.263868	6.71717	0.0675337	0.306345	Gli,wek,CG3793
2L:15879044-15881255	54.8708	85.8134	-0.645166	30.9427	0.813257	-30.9494	-0.447195	1.67802	CG7653
2L:15909968-15911762	80.6728	114.182	-0.501176	33.5088	0.817761	-33.5126	-0.347389	1.70244	beat-Ib,lncRNA:CR44867,lncRNA:CR44868
2L:15913754-15914082	252.583	205.13	0.300224	47.4538	0.770382	47.4547	0.208099	1.47134	beat-Ib,lncRNA:CR44868
2L:16258004-16259462	154.805	211.202	-0.448169	56.3966	0.877048	-56.3984	-0.310647	2.09596	twe,PRL-1,EndoGI
2L:16260834-16264073	132.808	104.065	0.351862	28.7434	0.742875	28.7455	0.243892	1.35819	crp,twe,CG4935
2L:16268982-16273464	73.8113	137.755	-0.900187	63.9433	0.946718	-63.9497	-0.623962	2.93215	crp
2L:16282303-16282822	491.098	1222.53	-1.31579	731.432	0.996896	-731.433	-0.912034	5.77496	crp
2L:16283416-16286393	195.432	178.131	0.13373	17.3012	0.431908	17.3017	0.0926945	0.565473	crp
2L:16291321-16293104	115.238	93.2464	0.305496	21.9915	0.665547	21.9936	0.211753	1.09526	CG17329,CG13258,pkaap,lncRNA:CR44899
2L:16303714-16306591	95.7965	94.7296	0.016157	1.06685	0.0468448	1.06698	0.0111992	0.0479775	Syx5,CG5861,c(2)M,GMF
2L:16307589-16309027	53.9068	129.308	-1.26227	75.4014	0.96626	-75.412	-0.874942	3.38906	cni,Syx5,CG5861
2L:16310214-16312024	134.299	171.521	-0.352932	37.2215	0.786285	-37.2232	-0.244634	1.54311	cni,fzy,Syx5
2L:16327271-16328950	183.398	220.646	-0.266757	37.2481	0.720585	-37.249	-0.184902	1.27506	mRpL4,CG4278,CG4440
2L:16340425-16342088	108.479	106.966	0.0202629	1.51296	0.0614758	1.5131	0.0140452	0.0634467	chif,Hyls1,CG42266,CG44405
2L:16342720-16346070	130.511	82.3053	0.665113	48.2056	0.902316	48.2102	0.461021	2.32601	chif,Hyls1,CG44405
2L:16443782-16444765	392.93	335.587	0.227584	57.3427	0.686641	57.3432	0.157749	1.16041	Idgf1,CG5888
2L:16445820-16447583	47.5873	79.1602	-0.734197	31.5728	0.820916	-31.5814	-0.508907	1.7199	Idgf2,Idgf1,CG5888
2L:16454307-16456244	141.241	76.356	0.887349	64.8854	0.947455	64.8914	0.615064	2.94609	Idgf3
2L:16467584-16468539	113.838	117.941	-0.051086	4.10323	0.153206	-4.10355	-0.0354101	0.166298	dac
2L:16468647-16469610	146.325	169.354	-0.210863	23.0288	0.594402	-23.0297	-0.146159	0.902393	dac
2L:16469764-16471683	201.736	103.074	0.968789	98.6621	0.975115	98.6668	0.671513	3.69347	dac
2L:16476509-16479370	140.974	97.5497	0.531221	43.4244	0.869109	43.4277	0.368214	2.03339	dac
2L:16479798-16480675	177.251	196.772	-0.150734	19.5214	0.480178	-19.522	-0.104481	0.654269	dac
2L:16481001-16483015	144.018	106.15	0.440155	37.8689	0.827583	37.8715	0.305093	1.75784	dac
2L:16483716-16484503	283.038	316.623	-0.161769	33.5848	0.534478	-33.5852	-0.11213	0.764597	dac
2L:16505693-16507019	96.0368	93.9179	0.0321874	2.11891	0.0860814	2.11916	0.0223106	0.0900138	Tpr2
2L:16588005-16589311	438.168	534.646	-0.287102	96.4786	0.780382	-96.4791	-0.199004	1.51586	mtgo
2L:16605895-16606853	57.3485	131.018	-1.19194	73.6693	0.963842	-73.6789	-0.826186	3.31986	CG4631,CG31815,mtgo
2L:16607521-16609582	82.6405	55.1852	0.582567	27.4552	0.7743	27.4614	0.403804	1.48855	CG4631,CG31815,mtgo
2L:16658639-16661644	55.5215	54.7668	0.0197459	0.754737	0.0340967	0.754995	0.0136868	0.0346915	mtgo
2L:16664257-16665564	82.7894	156.478	-0.918438	73.6882	0.95743	-73.6939	-0.636613	3.15661	Trpgamma
2L:16667683-16669605	107.389	85.2588	0.332921	22.1298	0.675471	22.1323	0.230763	1.12538	Trpgamma
2L:16671601-16673125	456.492	394.78	0.209542	61.7123	0.651043	61.7127	0.145243	1.05281	Trpgamma
2L:16676058-16679557	135.666	125.968	0.106999	9.69775	0.331323	9.69834	0.0741663	0.402454	her,Trpgamma,grp,mir-2497,squ
2L:16697496-16699739	77.3856	91.4915	-0.241572	14.1059	0.515929	-14.108	-0.167445	0.725523	grp,mir-306,mir-9b,mir-9c,mir-79,CR43669,asRNA:CR44975
2L:16700129-16702262	118.448	185.358	-0.646056	66.9096	0.933003	-66.9127	-0.447812	2.7031	grp,CR43669,CR43670
2L:16705670-16707052	206.22	273.59	-0.407826	67.3692	0.869313	-67.3704	-0.282684	2.03495	CG31808
2L:16728163-16730851	155.635	156.805	-0.0108088	1.1704	0.0432061	-1.17045	-0.00749207	0.0441673	VhaSFD,CG17996,Prosbeta4,Tsen2,CR43671
2L:16732753-16735054	118.612	98.5824	0.266842	20.0291	0.623104	20.0309	0.184961	0.975787	glu,Prosbeta4,Nubp1
2L:16735170-16736306	56.8119	144.402	-1.34582	87.5898	0.976463	-87.6001	-0.932853	3.74919	glu
2L:16824042-16825190	59.7355	118.204	-0.984617	58.4684	0.940025	-58.4767	-0.682484	2.81383	mdy,Cse1
2L:16829661-16830816	17.9672	73.977	-2.04171	56.0098	0.940585	-56.047	-1.41521	2.82321	AspRS-m
2L:16835288-16837239	36.3184	65.1679	-0.843461	28.8495	0.795725	-28.8618	-0.584643	1.58829	CG13282,Nepl9,SclA,SclB
2L:16880619-16882085	34.5241	48.5144	-0.490809	13.9903	0.543308	-13.9989	-0.340203	0.783746	CG31743,CG34313
2L:16885919-16887579	107.152	119.268	-0.154556	12.1166	0.415165	-12.1176	-0.10713	0.536426	CG31743,osi,CG34313,tweek,lncRNA:CR44392
2L:16889551-16891488	110.406	132.955	-0.26812	22.5491	0.649415	-22.5507	-0.185847	1.04815	CG42556,tweek,lncRNA:CR44392
2L:16891590-16892942	91.1669	108.31	-0.248591	17.1436	0.573893	-17.1454	-0.17231	0.853065	CG42556,tweek
2L:16905348-16907311	147.982	75.8498	0.964209	72.1327	0.957812	72.1391	0.668339	3.16561	ApepP,tweek
2L:16912281-16914668	80.5313	77.4594	0.0561084	3.07185	0.133359	3.07236	0.0388914	0.14313	tweek
2L:16914831-16917135	88.43	153.058	-0.791471	64.628	0.941959	-64.6328	-0.548606	2.84661	tweek
2L:16950932-16951902	296.877	468.492	-0.658156	171.614	0.963232	-171.616	-0.456199	3.30312	lncRNA:CR44393
2L:16979124-16981687	282.3	143.606	0.975109	138.693	0.983868	138.697	0.675894	4.12693	beat-IIIb,CG44406,lncRNA:CR44408
2L:17036176-17037932	127.352	138.87	-0.124912	11.5179	0.369873	-11.5186	-0.0865822	0.461834
2L:17083164-17085827	331.819	183.146	0.857399	148.673	0.979237	148.675	0.594304	3.87457	lncRNA:CR43819
2L:17125797-17126581	421.581	698.322	-0.728083	276.741	0.974224	-276.742	-0.504669	3.65831	CG31784
2L:17172801-17174203	207.529	156.34	0.408629	51.1893	0.852774	51.1909	0.28324	1.91578	CG34106,CG34169,beat-IIIa
2L:17176216-17177752	146.593	114.615	0.355027	31.9785	0.76916	31.9805	0.246086	1.46603	Gr36a,CR44394
2L:17259765-17260702	112.209	144.278	-0.362662	32.0689	0.769669	-32.071	-0.251378	1.46824	beat-IIIc
2L:17363761-17365117	185.917	96.4525	0.946767	89.4644	0.97	89.4694	0.656249	3.50656	CG31804
2L:17373685-17374747	66.4195	85.9022	-0.371088	19.4827	0.650153	-19.4862	-0.257218	1.05026	Lrch
2L:17404722-17407978	64.5141	47.2074	0.450602	17.3067	0.618015	17.3126	0.312334	0.962375	CLIP-190
2L:17456865-17458552	95.8414	97.7796	-0.0288844	1.93819	0.0810941	-1.9384	-0.0200211	0.0845716	CG5050,SPH93,CG18563
2L:17461329-17462884	137.034	111.913	0.292158	25.1212	0.684555	25.1229	0.202508	1.15377	BicD
2L:17463118-17464319	139.108	157.634	-0.180372	18.5259	0.524148	-18.5267	-0.125024	0.742648	BicD
2L:17473693-17474371	156.755	341.843	-1.12482	185.088	0.990891	-185.092	-0.779669	4.69845	BicD,Sgt,cass
2L:17475973-17477874	91.0349	57.0258	0.674805	34.0091	0.837608	34.0158	0.467739	1.81774	fws,cass
2L:17488204-17489801	53.0041	59.1785	-0.158969	6.17441	0.269313	-6.17646	-0.110189	0.31377	qua
2L:17499689-17500418	13.5955	140.515	-3.36953	126.92	0.991654	-126.964	-2.33558	4.78597	Dhc36C,CG15142,mEFTs
2L:17554763-17557245	65.8632	71.0297	-0.108949	5.16648	0.223511	-5.16763	-0.0755179	0.252973	CG7094
2L:17588177-17591473	119.355	104.14	0.19674	15.2154	0.510967	15.2167	0.13637	0.715325	Oli,CG6870,Sytalpha,lncRNA:CR44410,lncRNA:CR44411
2L:17605746-17607374	97.6127	229.599	-1.23398	131.986	0.988728	-131.992	-0.855327	4.48541	lncRNA:CR44412
2L:17624593-17627428	168.226	119.479	0.493645	48.7471	0.876438	48.7496	0.342169	2.09101	CG15147,CG43054,lncRNA:CR44413
2L:17660960-17663257	49.6455	76.5686	-0.625091	26.9231	0.770076	-26.9304	-0.43328	1.47001	CadN
2L:17715257-17716459	175.769	271.116	-0.625228	95.3468	0.94743	-95.3489	-0.433375	2.94561	CadN
2L:17718232-17720681	157.098	87.4473	0.845183	69.651	0.950814	69.6562	0.585836	3.01215	CadN
2L:17737897-17739674	119.693	126.98	-0.0852674	7.28743	0.265522	-7.28793	-0.0591029	0.308595	CadN
2L:17742274-17744516	75.1813	127.882	-0.766371	52.701	0.919364	-52.7066	-0.531208	2.51781	CadN
2L:17795933-17798981	67.9174	63.8621	0.0888222	4.05534	0.177761	4.05632	0.0615669	0.195724	CadN2
2L:17859215-17860863	331.404	155.271	1.0938	176.133	0.989975	176.136	0.758167	4.60263	CadN2
2L:17899402-17902255	175.593	112.148	0.646827	63.4447	0.929771	63.448	0.448346	2.65599	lncRNA:CR45332,lncRNA:CR45333
2L:18008624-18010908	146.628	174.611	-0.251988	27.9835	0.668346	-27.9847	-0.174665	1.10366	elfless,CG31740,CG42634,CG42635,CG42659
2L:18011101-18013049	99.9432	209.315	-1.06649	109.371	0.981603	-109.377	-0.739237	3.99557	elfless,rdo
2L:18025800-18026778	121.004	202.292	-0.741389	81.2885	0.953639	-81.2918	-0.513892	3.07129	rdo
2L:18136811-18137941	37.0536	102.624	-1.46969	65.5709	0.957099	-65.5873	-1.01871	3.14887	kel,Socs36E
2L:18139664-18142331	96.126	127.249	-0.404652	31.1226	0.780585	-31.1253	-0.280483	1.51679	Socs36E
2L:18143051-18143774	252.126	93.5424	1.43045	158.584	0.99341	158.59	0.991516	5.02215	Socs36E
2L:18143806-18147317	74.0616	164.413	-1.15053	90.3517	0.975573	-90.359	-0.797486	3.71205	Socs36E,lncRNA:CR44478
2L:18159169-18161416	44.7657	68.1944	-0.60726	23.4287	0.727761	-23.4366	-0.420921	1.30107	JMJD4,CG42750
2L:18449468-18450520	65.7467	181.438	-1.46449	115.692	0.987888	-115.701	-1.01511	4.41356	ncm,bsf
2L:18450610-18451782	60.6438	107.444	-0.825152	46.8001	0.905802	-46.8074	-0.571952	2.36235	bsf
2L:18453678-18455056	252.607	200.629	0.332364	51.9779	0.803104	51.9789	0.230377	1.62508	Ntf-2r,lncRNA:let7C,bsf
2L:18471645-18473468	56.7353	78.9723	-0.4771	22.237	0.704529	-22.2421	-0.330701	1.21919	CG10283,mir-let7,mir-125,mir-100,lncRNA:let7C
2L:18561443-18563074	111.687	92.2496	0.275847	19.4374	0.622239	19.4393	0.191202	0.973494	Pde11
2L:18592301-18593524	63.5521	83.2644	-0.38976	19.7123	0.657201	-19.7161	-0.270161	1.07061	CG15160
2L:18595051-18597051	50.1904	59.2969	-0.240544	9.10645	0.38285	-9.10963	-0.166732	0.482643	amos,CG15160
2L:18599279-18601767	63.8101	43.7306	0.545141	20.0795	0.674046	20.0869	0.377863	1.121	CG10413
2L:18601953-18603973	64.716	83.4292	-0.36643	18.7132	0.637048	-18.7168	-0.25399	1.01349	CG10413
2L:18608650-18610384	73.3828	75.2659	-0.0365548	1.88312	0.0825954	-1.88347	-0.0253378	0.0862067	CG10333,Atac2
2L:18617531-18621024	203.141	153.228	0.406799	49.9127	0.851094	49.9144	0.281972	1.90444	MESR3
2L:18651322-18654871	173.951	71.905	1.27452	102.046	0.982417	102.054	0.88343	4.04084	Cyp310a1,MESR3
2L:18663381-18666568	112.077	162.493	-0.535883	50.4157	0.890102	-50.4185	-0.371446	2.2082	CR42490,CG43338
2L:18675902-18679030	109.531	95.8248	0.192871	13.7064	0.478855	13.7078	0.133688	0.651727	tos,Mst36Fa,CG31751,Mst36Fb
2L:18679321-18682631	272.24	260.545	0.0633479	11.6953	0.232087	11.6954	0.0439094	0.264078	tos,CG31751
2L:18684902-18686830	104.322	108.783	-0.0604106	4.46109	0.172723	-4.4615	-0.0418735	0.189615	msl-1
2L:18691754-18693203	93.634	75.6612	0.307478	17.9728	0.611578	17.9754	0.213128	0.945662	CG10336,CG10383
2L:18694664-18697374	60.7201	71.073	-0.227127	10.3529	0.420534	-10.3554	-0.157432	0.545649	CG10383,CG10338
2L:18707769-18708697	184.358	488.93	-1.40712	304.572	0.997354	-304.575	-0.975341	5.93459	Faf2,Grip71
2L:18709518-18711919	219.454	122.876	0.836718	96.5784	0.968244	96.5821	0.579969	3.44968	Faf2,Grip71,Irk3
2L:18832827-18835871	93.0436	106.295	-0.192098	13.2517	0.470738	-13.253	-0.133152	0.636272	ScpX,CG10600
2L:18836291-18836823	161.681	167.993	-0.0552536	6.31231	0.20341	-6.31255	-0.0382989	0.227415	CG10600
2L:18836955-18838441	112.887	183.237	-0.698835	70.3502	0.941628	-70.3537	-0.484395	2.84093	CG10600
2L:18852680-18854587	97.2189	93.5441	0.0555904	3.67482	0.152519	3.67524	0.0385323	0.165487	CG17321,CG10602
2L:18855425-18857150	63.3726	124.499	-0.974207	61.1267	0.944631	-61.1345	-0.675269	2.89374	CG17321,mRpL13,CG10602
2L:18857253-18858221	132.163	124.82	0.0824631	7.34245	0.252519	7.34292	0.0571591	0.291047	mRpL13,CG10602
2L:18949104-18949947	58.8784	179.32	-1.60672	120.441	0.989517	-120.452	-1.1137	4.55796	CG10428
2L:18958617-18959773	72.7824	102.203	-0.489776	29.4206	0.786081	-29.4247	-0.339487	1.54216	Nak
2L:18963734-18965489	229.343	159.179	0.526852	70.1633	0.914402	70.1653	0.365186	2.45809	Nak
2L:18972334-18974925	88.6367	87.7007	0.0153155	0.935981	0.0414504	0.936107	0.0106159	0.042334	Tango6,L2HGDH,CG10431
2L:18975992-18978131	122.665	94.1103	0.382299	28.5547	0.753486	28.5572	0.264989	1.40034	CG10431,Swip-1
2L:18985719-18986699	475.697	224.63	1.08249	251.066	0.991985	251.068	0.750324	4.82641	Swip-1
2L:18987936-18989474	96.1211	150.176	-0.643725	54.0544	0.912646	-54.0583	-0.446196	2.43779	Swip-1,EMC5,CG15170
2L:19006950-19008670	109.322	193.838	-0.826266	84.516	0.961145	-84.52	-0.572724	3.24792	CG31793,snoRNA:Me28S-A2113,RpL30
2L:19023513-19027228	250.873	372.105	-0.568754	121.232	0.943003	-121.234	-0.39423	2.86475	CG15172,Sidpn,lncRNA:CR43700
2L:19029107-19031309	96.1648	84.5554	0.185612	11.6094	0.437684	11.6109	0.128656	0.575692	hook,Sidpn
2L:19034811-19036268	384.691	388.1	-0.0127264	3.40848	0.0552672	-3.40851	-0.00882128	0.0568531	CG31800,mib2
2L:19040220-19041163	78.8716	178.287	-1.17663	99.4156	0.980025	-99.4226	-0.815574	3.9133	Catsup,mib2
2L:19043383-19046390	31.084	57.6564	-0.891311	26.5724	0.771043	-26.5874	-0.617809	1.47422	Catsup,Ttc19,Acn
2L:19046664-19047511	74.6062	147.544	-0.98378	72.9381	0.959262	-72.9447	-0.681905	3.2006	Acn
2L:19049518-19050120	534.361	444.051	0.267089	90.3099	0.752595	90.3103	0.185132	1.39673	l(2)37Bb,CG10470,Acn
2L:19050312-19053204	146.293	208.532	-0.511413	62.2396	0.902341	-62.2417	-0.354485	2.32627	l(2)37Bb,CG10470,CG10492,Rpn3
2L:19054501-19054908	193.268	591.252	-1.61317	397.984	0.998524	-397.987	-1.11816	6.51854	CG10492,Rpn3
2L:19055080-19055451	12.9622	92.6597	-2.83764	79.6976	0.972824	-79.7481	-1.9669	3.60544	CG10492
2L:19056539-19058233	87.5178	95.5723	-0.127015	8.05446	0.319008	-8.05546	-0.0880404	0.384204	CG10492,Phlpp
2L:19059256-19060955	100.62	102.149	-0.021751	1.52851	0.0620102	-1.52866	-0.0150767	0.0640162	CG10492,Phlpp
2L:19061381-19062031	17.5487	162.4	-3.21011	144.851	0.994198	-144.887	-2.22508	5.14963	Phlpp
2L:19063705-19065036	72.8058	151.25	-1.05481	78.444	0.965216	-78.4511	-0.731137	3.35861	Phlpp,CG10495,CG17343,CG10702
2L:19071050-19072521	29.6304	56.0802	-0.920413	26.4498	0.769771	-26.4658	-0.637981	1.46868	CG17572
2L:19117383-19117943	363.995	102.826	1.82371	261.169	0.998499	261.175	1.2641	6.50144	Ddc,CG10561
2L:19122239-19124781	55.7855	65.8472	-0.239233	10.0617	0.413664	-10.0646	-0.165823	0.533862	Phb1,l(2)37Cb
2L:19129723-19131819	80.4952	91.1526	-0.179381	10.6574	0.41112	-10.6589	-0.124338	0.529532	AsnRS,l(2)37Cd,DCTN6-p27
2L:19160693-19162562	225.672	308.761	-0.452268	83.0898	0.896031	-83.091	-0.313488	2.26366	brat
2L:19168500-19169688	447.51	378.867	0.240228	68.643	0.705623	68.6434	0.166514	1.2229	brat
2L:19186421-19189563	113.525	73.2236	0.63263	40.3014	0.86883	40.3064	0.438506	2.03126	gammaTub37C,pigeon,drl
2L:19191659-19193967	154.613	168.956	-0.127985	14.343	0.413435	-14.3436	-0.0887127	0.533472	drl
2L:19204951-19207117	73.2426	101.019	-0.463876	27.7767	0.765267	-27.7806	-0.321534	1.44931	drl
2L:19219794-19220436	204.709	431.224	-1.07486	226.515	0.99112	-226.517	-0.745036	4.72391
2L:19254244-19255024	119.467	167.519	-0.487708	48.0515	0.874707	-48.0539	-0.338053	2.0771
2L:19273004-19274415	110.876	289.814	-1.38618	178.938	0.994377	-178.943	-0.960827	5.18082	lncRNA:CR44190
2L:19292812-19294354	397.356	194.458	1.03097	202.898	0.989491	202.901	0.714617	4.55553
2L:19367420-19369736	134.913	228.876	-0.762535	93.9627	0.961603	-93.9658	-0.528549	3.25978	CG17349
2L:19393734-19394833	116.438	189.831	-0.705155	73.3929	0.944962	-73.3963	-0.488776	2.89973	CG17544,CG31798
2L:19399463-19401334	81.4679	54.3173	0.584819	27.1506	0.770382	27.1569	0.405365	1.47134	CG17544,Pax
2L:19444302-19447627	232.862	125.004	0.897496	107.857	0.975216	107.861	0.622097	3.69757	RanGAP,Hs2st,Top2
2L:19459669-19461263	384.138	257.343	0.57793	126.795	0.945598	126.796	0.400591	2.91135
2L:19464904-19467450	233.94	194.304	0.267818	39.6352	0.725394	39.6361	0.185637	1.29242	tj
2L:19467533-19470849	185.293	184.271	0.00798327	1.0225	0.0398219	1.02253	0.00553358	0.0406365	tj,lncRNA:CR43839,lncRNA:CR45722,lncRNA:CR45723
2L:19487605-19490719	100.62	107.52	-0.0956955	6.90054	0.268295	-6.9012	-0.066331	0.312378	CG13083,CG10194,CG18094,CG10189
2L:19494760-19497718	68.3438	58.9771	0.212655	9.3667	0.385318	9.36911	0.147401	0.48665	swm,Top3alpha
2L:19498199-19500025	260.469	191.155	0.446363	69.3131	0.889059	69.3146	0.309395	2.19875	swm,Top3alpha
2L:19509333-19511289	77.6822	104.466	-0.427371	26.7834	0.750458	-26.7868	-0.296231	1.38813	cyst,Hasp
2L:19513130-19514681	73.4175	98.5523	-0.424765	25.1348	0.732341	-25.1384	-0.294425	1.31804	Hasp
2L:19519482-19521498	170.491	118.744	0.521834	51.7464	0.889109	51.749	0.361708	2.19921	CG10132,lncRNA:CR43363
2L:19521846-19523070	46.175	72.2906	-0.646697	26.1156	0.761679	-26.1236	-0.448256	1.43414	CG10132
2L:19524203-19525160	84.3073	127.075	-0.591946	42.7673	0.875547	-42.7714	-0.410306	2.08383	CG10132,Dpm1
2L:19528039-19529789	268.871	139.251	0.949222	129.619	0.981323	129.623	0.65795	3.98047	CG10137,CG10165
2L:19530946-19532689	121.531	135.352	-0.15539	13.8209	0.451578	-13.8218	-0.107708	0.60071	CG10137,CG10165,CG33116
2L:19539508-19541780	82.628	152.047	-0.879812	69.4187	0.951959	-69.4243	-0.609839	3.03571	ref(2)P,CG13082,CG13081
2L:19543482-19544702	121.148	177.556	-0.551501	56.4078	0.903715	-56.4105	-0.382271	2.34044	ref(2)P,CG10337
2L:19563218-19564728	58.7659	75.5896	-0.363209	16.8237	0.600407	-16.8277	-0.251757	0.917309	CG13078,Tep5Psi
2L:19566488-19567431	113.356	143.272	-0.337888	29.9153	0.747176	-29.9172	-0.234206	1.37506	spi,CG13077
2L:19583140-19584205	15.8737	133.099	-3.06779	117.226	0.990102	-117.266	-2.12643	4.6154	Hakai,PCNA2,CG10366
2L:19584253-19585012	50.7743	207.146	-2.02848	156.372	0.995064	-156.385	-1.40603	5.31112	PCNA2,CG10366
2L:19698129-19701257	110.293	43.905	1.32888	66.3877	0.957506	66.401	0.92111	3.1584	Lar,scw,CG46244
2L:19701531-19703125	355.261	356.622	-0.00551836	1.36149	0.0464885	-1.3615	-0.00382504	0.0476038	Lar,scw,CG46244
2L:19726329-19727065	43.3916	60.6888	-0.484015	17.2972	0.619364	-17.304	-0.335494	0.965911	Lar,CG46244
2L:19728106-19728739	7.42406	69.7196	-3.23129	62.2956	0.953562	-62.3793	-2.23976	3.06964	Lar,CG46244
2L:19728750-19730095	167.005	97.5681	0.775413	69.4373	0.946387	69.4416	0.537475	2.92596	Lar,CG46244
2L:19730984-19734909	128.287	69.4535	0.885259	58.8338	0.937532	58.8404	0.613614	2.7731	Lar,CG10462,CG46244
2L:19735900-19736647	86.1047	374.185	-2.11959	288.081	0.999211	-288.088	-1.46919	7.14499	CG10462,Nf-YB
2L:19741800-19744211	119.127	122.383	-0.0389015	3.25589	0.123486	-3.25613	-0.0269645	0.131803	CG10631,CR44906
2L:19746853-19748933	59.0206	72.9883	-0.306447	13.9677	0.531298	-13.9711	-0.212413	0.757787	CG10631
2L:19751163-19752358	115.681	115.748	-0.000841844	0.0675218	0.00320611	-0.0675271	-0.000583522	0.00321126	CG10631
2L:19757567-19760358	131.182	96.3104	0.445808	34.8718	0.816209	34.8746	0.309011	1.69395	CG10631,CG10628,CG10463
2L:19763506-19764121	335.053	478.424	-0.5139	143.371	0.928499	-143.372	-0.356208	2.63804	fbp
2L:19764517-19767825	170.948	146.942	0.218302	24.0051	0.613155	24.006	0.151315	0.949732	bsh,fbp
2L:19771016-19772815	250.36	391.459	-0.644858	141.099	0.95799	-141.101	-0.446982	3.16984
2L:19776759-19777882	197.946	332.711	-0.749163	134.765	0.970178	-134.767	-0.51928	3.51251	CdGAPr
2L:19778945-19780197	357.342	269.35	0.407823	87.9919	0.878626	87.9928	0.282681	2.10888	CdGAPr
2L:19781554-19783273	202.185	188.01	0.104861	14.1742	0.349059	14.1746	0.072684	0.429336	CdGAPr
2L:19790567-19794520	132.006	119.923	0.138505	12.0839	0.404427	12.0847	0.0960044	0.518232	fs(2)ltoPP43,CdGAPr,CG10466
2L:19865262-19868281	126.299	93.3241	0.436526	32.9753	0.802875	32.9782	0.302577	1.62392	sick
2L:19923329-19926243	137.846	125.586	0.134375	12.2594	0.393181	12.2601	0.093142	0.499524	sick,lncRNA:CR43827
2L:19941841-19946532	75.8184	58.8805	0.364758	16.9379	0.602468	16.9418	0.252831	0.92248	sick
2L:19960303-19963128	78.3089	84.1521	-0.103823	5.84321	0.240356	-5.84413	-0.0719648	0.274906	COX4,CG13965,CG16772,CG34051,CG42866,asRNA:CR45701
2L:20027609-20032417	103.135	75.2997	0.453816	27.8352	0.764326	27.8389	0.314562	1.4453	sNPF
2L:20058833-20061297	228.961	132.223	0.79213	96.738	0.96458	96.7412	0.549062	3.34048	barr,lok
2L:20076398-20078021	91.9525	64.8315	0.504193	27.1209	0.763537	27.1256	0.34948	1.44196	pr,neb
2L:20088359-20090579	168.03	166.56	0.012679	1.47025	0.0477863	1.47031	0.00878845	0.0489658	neb,CG10747,Pyroxd1
2L:20091928-20093329	134.579	88.9196	0.597885	45.6599	0.886768	45.6638	0.414422	2.17832	CG10747,Pyroxd1,Taf13,nesd
2L:20123565-20126329	190.552	267.287	-0.488205	76.7351	0.907506	-76.7366	-0.338398	2.38062
2L:20133840-20135132	63.9536	152.448	-1.25322	88.4948	0.976081	-88.5037	-0.868669	3.7331	CG10651
2L:20291870-20293085	202.62	412.274	-1.02483	209.655	0.989466	-209.657	-0.710358	4.55311
2L:20330778-20333467	147.6	43.3925	1.76618	104.208	0.9857	104.223	1.22422	4.24748	spir
2L:20338945-20340797	204.142	92.0404	1.14923	112.101	0.983842	112.107	0.796586	4.12535	spir
2L:20342266-20343582	248.755	432.412	-0.797681	183.657	0.977176	-183.659	-0.55291	3.77992	spir
2L:20343750-20347586	106.45	175.266	-0.719366	68.8158	0.941883	-68.8195	-0.498626	2.8453	spir,La
2L:20348336-20349488	231.506	311.182	-0.426709	79.676	0.885674	-79.6771	-0.295772	2.1687	spir,La,RtGEF
2L:20350858-20353491	253.496	305.296	-0.268246	51.8001	0.741247	-51.8008	-0.185934	1.35188	La,RtGEF,snoRNA:Me28S-A3365
2L:20358560-20361814	106.209	50.3475	1.07692	55.8619	0.936361	55.8723	0.746463	2.75453	RtGEF
2L:20364377-20367660	92.8841	63.5878	0.54668	29.2962	0.791221	29.3013	0.37893	1.56648	RtGEF
2L:20381372-20386312	145.574	87.2537	0.738468	58.3206	0.929873	58.3253	0.511867	2.65744	CG16798,CG10947
2L:20422663-20425270	123.526	89.6896	0.461805	33.8366	0.812901	33.8398	0.320099	1.67612	Arpc2,CG15130,snoRNA:Psi18S-640g,snoRNA:Psi18S-525j,snoRNA:Psi18S-525i,CG31688
2L:20425747-20427146	111.926	182.598	-0.706134	70.6728	0.942697	-70.6763	-0.489455	2.85941	CG31688
2L:20428323-20432624	182.01	125.459	0.536799	56.5508	0.901654	56.5533	0.372081	2.31926	CG31688
2L:20441099-20442503	223.844	145.931	0.617205	77.9128	0.937226	77.9152	0.427814	2.76822	CG31688
2L:20461386-20462906	74.5527	70.0783	0.0892943	4.47447	0.192112	4.47536	0.0618941	0.213332	Cdc23,CG2493
2L:20584216-20585613	335.197	131.208	1.35316	203.99	0.995038	203.994	0.937938	5.30598	lncRNA:CR44909
2L:20599099-20601793	101.881	66.3354	0.61903	35.5453	0.844555	35.5507	0.429079	1.86146	lncRNA:CR44909
2L:20626442-20628286	167.827	121.77	0.462826	46.0579	0.861018	46.0603	0.320806	1.97341	lncRNA:CR44909
2L:20644263-20647687	104.128	109.046	-0.0665753	4.91773	0.193562	-4.91818	-0.0461465	0.215129	phr6-4,CG2608,snoRNA:Me28S-C2645c,snoRNA:Me28S-C2645b,snoRNA:Me28S-C2645a,Uhg3
2L:20649017-20649716	104.967	131.836	-0.328815	26.8695	0.719746	-26.8715	-0.227917	1.27206	CG2611,CG18810,snoRNA:Me28S-C2645c,snoRNA:Me28S-C2645b,Uhg3
2L:20649832-20650590	283.622	401.297	-0.5007	117.675	0.923282	-117.676	-0.347059	2.56762	CG2611,CG18810,Uhg3,brun
2L:20652928-20656916	86.7775	77.8369	0.156867	8.94058	0.357735	8.94196	0.108732	0.442755	CG2614,brun
2L:20657653-20658711	44.9	95.5844	-1.09006	50.6844	0.923486	-50.6961	-0.755572	2.57028	CG2614,CG31678
2L:20672357-20674978	132.615	57.8819	1.19606	74.7329	0.964809	74.7425	0.829044	3.34697	CG31678
2L:20676933-20678203	26.0652	105.106	-2.01165	79.0407	0.971807	-79.0662	-1.39437	3.56867	Cen,CG31678,IKKepsilon
2L:20731025-20737748	114.5	100.61	0.186579	13.8904	0.48173	13.8916	0.129327	0.657259	CarT,TM9SF2,Fs(2)Ket
2L:20737936-20739721	216.742	196.138	0.144116	20.605	0.465903	20.6055	0.0998939	0.627178	Fs(2)Ket
2L:20749280-20753406	110.602	94.7074	0.223831	15.8948	0.536081	15.8964	0.155148	0.768046	Amacr,Ns4,Fs(2)Ket
2L:20788603-20789754	134.683	141.452	-0.0707417	6.76871	0.227939	-6.76908	-0.0490344	0.258692	Pomp,vari
2L:20789890-20790579	70.9699	88.1659	-0.313014	17.196	0.598193	-17.1989	-0.216965	0.911784	Pomp,vari
2L:20791479-20793859	172.473	67.5723	1.35186	104.9	0.984097	104.909	0.937041	4.14123	vari,lncRNA:CR44146
2L:20800756-20802908	129.503	122.56	0.0794967	6.94295	0.246921	6.94341	0.0551029	0.283585	CG9328
2L:20826802-20828689	125.006	107.966	0.211414	17.0396	0.543028	17.0409	0.146541	0.783133	CG9331,CG31673
2L:20829885-20831832	117.773	98.584	0.256582	19.1889	0.607252	19.1906	0.177849	0.934587	CG31673,CG31674
2L:20852856-20854374	389.278	195.034	0.997072	194.243	0.988295	194.246	0.691118	4.44775	twit
2L:20856263-20857440	224.523	172.794	0.377811	51.7291	0.837888	51.7305	0.261878	1.81947	twit,CG14400
2L:20857590-20860363	134.193	106.807	0.329293	27.3852	0.72369	27.3872	0.228249	1.28623	twit,CG14400,CG9336
2L:20871920-20872783	283.921	318.656	-0.166511	34.7351	0.556947	-34.7355	-0.115417	0.814065	CG14401,sky,CG43739
2L:20883925-20886062	121.571	143.206	-0.236292	21.635	0.617964	-21.6363	-0.163785	0.962241	sky,CG43739
2L:20889778-20890913	244.026	136.174	0.841578	107.851	0.972036	107.855	0.583337	3.57682	sky,CG43739
2L:20911122-20914398	91.849	124.331	-0.436849	32.4819	0.799822	-32.4849	-0.302801	1.60855	sky,CG43739
2L:20919353-20920779	169.456	103.664	0.708995	65.7919	0.937863	65.7957	0.491438	2.77841	sky,CG43739,Mtp
2L:20921936-20924371	74.2658	67.3632	0.140737	6.90258	0.29056	6.90401	0.0975513	0.343279	RPA2,CR33318,Mtp
2L:20957993-20961607	141.861	284.022	-1.00152	142.16	0.984809	-142.164	-0.694202	4.18706
2L:20981593-20982380	308.607	509.926	-0.724518	201.319	0.971552	-201.32	-0.502198	3.55968	CG42238
2L:21008527-21009680	111.931	226.855	-1.01916	114.924	0.981603	-114.928	-0.706426	3.99557	CG42238
2L:21055066-21056679	218.293	184.554	0.24222	33.7385	0.676539	33.7394	0.167894	1.12868	Itgbn
2L:21082005-21084078	68.5535	67.5414	0.0214584	1.01211	0.0441985	1.01233	0.0148738	0.045205	tadr,CG33509,CG33510,CG33511
2L:21092141-21096170	98.352	89.1193	0.142217	9.23274	0.354478	9.23383	0.0985773	0.437697	CG14397,CG34136,l(2)05287
2L:21103100-21103775	67.154	209.821	-1.64361	142.667	0.99285	-142.676	-1.13927	4.94063	CG9257,Nhe2,asRNA:CR43809,CG46307,l(2)05287
2L:21114769-21116455	130.956	160.658	-0.294914	29.7024	0.714173	-29.7039	-0.204419	1.25237	Nhe2,CG46307
2L:21119855-21121117	490.994	331.234	0.567856	159.76	0.946183	159.761	0.393607	2.92217	Nhe2,CG46307
2L:21131914-21134202	188.453	109.37	0.784991	79.0833	0.953969	79.0872	0.544114	3.07845	Dap160,Nhe2,CG46307
2L:21134994-21137762	104.383	105.571	-0.0163339	1.18851	0.0515267	-1.18863	-0.0113218	0.0529017	Dap160,Nhe2
2L:21138715-21140911	161.509	81.0664	0.994441	80.4428	0.965522	80.449	0.689294	3.36742	Dap160
2L:21141360-21143624	231.057	554.312	-1.26245	323.255	0.996031	-323.258	-0.875064	5.52912	Dap160,pths,snoRNA:Me18S-A469
2L:21145321-21147201	192.782	138.303	0.479136	54.4789	0.883664	54.481	0.332112	2.15127	pths,del
2L:21153934-21155761	257.03	204.298	0.331263	52.7321	0.803893	52.7331	0.229614	1.6291	E2f2,Mpp6
2L:21156614-21157861	308.781	375.882	-0.283698	67.1014	0.762366	-67.102	-0.196644	1.43703	E2f2,Mpp6,Coq3,Pld3
2L:21158896-21161454	136.118	113.27	0.265097	22.8484	0.652239	22.8499	0.183751	1.05624	Coq3,Pld3,Nbr
2L:21164168-21167741	95.2749	45.6955	1.06004	49.5793	0.920611	49.5907	0.734765	2.53339	mAcon1,CG9246,CG43345,CG43346,asRNA:CR44910
2L:21169757-21171448	85.4798	91.3286	-0.0954835	5.84882	0.240865	-5.8496	-0.0661841	0.275576	mAcon1
2L:21174562-21175053	157.24	430.039	-1.4515	272.8	0.997303	-272.803	-1.0061	5.91554	bur,CG31627
2L:21175193-21176082	13.713	98.581	-2.84577	84.868	0.976845	-84.9157	-1.97254	3.76554	bur,scaRNA:PsiU2-38.40.42
2L:21209866-21212157	63.9874	97.8864	-0.613321	33.899	0.833206	-33.9046	-0.425122	1.791	clumsy,Atg18b
2L:21217730-21218795	324.658	201.986	0.684666	122.672	0.961527	122.674	0.474574	3.25779	CG8679,Atg18b
2L:21223649-21226115	112.618	82.7342	0.44488	29.8837	0.780916	29.887	0.308367	1.5183	CG8677
2L:21226292-21227378	158.329	175.163	-0.145777	16.8345	0.465598	-16.8351	-0.101045	0.626607	CG8677
2L:21235537-21237295	79.9285	90.8184	-0.184274	10.8899	0.415929	-10.8914	-0.127729	0.537732	CG31626,Hr39
2L:21283983-21285802	108.922	123.25	-0.178288	14.3277	0.479364	-14.3288	-0.12358	0.652704	Mondo,Cyp6t2Psi
2L:21309417-21310483	327.088	274.662	0.252021	52.4259	0.715522	52.4265	0.174688	1.2571	crc,Mondo
2L:21343676-21346625	153.566	145.175	0.0810664	8.39106	0.265267	8.39145	0.0561909	0.308248	Tsp39D
2L:21364558-21365866	52.7531	89.6838	-0.765591	36.9307	0.859466	-36.9386	-0.530667	1.9623	dtr
2L:21377667-21378893	77.6334	151.837	-0.967772	74.2034	0.959847	-74.2097	-0.670809	3.21507	CG8665
2L:21391524-21392627	86.8084	148.876	-0.778205	62.0676	0.937735	-62.0725	-0.539411	2.77636	nrv3
2L:21577495-21579023	72.2311	96.3002	-0.414917	24.069	0.719135	-24.0726	-0.287599	1.26988	nompB,Lamp1,CR42545
2L:21658103-21658657	138.953	224.595	-0.692732	85.6422	0.951425	-85.645	-0.480165	3.02464	Cul2,lncRNA:CR43144
2L:21660632-21663338	128.425	148.391	-0.208475	19.9658	0.57229	-19.9669	-0.144504	0.84931	Cul2,CG2225
2L:21665000-21666999	87.3301	110.257	-0.336321	22.927	0.688651	-22.9295	-0.23312	1.16684	CG2225,asRNA:CR46066
2L:21678491-21679166	56.7285	341.174	-2.58836	284.446	0.999415	-284.458	-1.79412	7.44349	eEF2,CG2225
2L:21680863-21681797	137.645	157.427	-0.193737	19.7826	0.547583	-19.7836	-0.134288	0.79315	eEF2,sncRNA:254
2L:21741668-21743419	112.629	87.0768	0.371216	25.552	0.724504	25.5547	0.257307	1.28918	step
2L:21757209-21758654	214.1	272.694	-0.348995	58.5935	0.824936	-58.5945	-0.241905	1.74261	CG1416,step
2L:21920306-21922782	38.4334	216.077	-2.49112	177.644	0.99659	-177.661	-1.72671	5.68114	CG11634
2L:21934563-21936112	25.7444	123.324	-2.26013	97.5801	0.983766	-97.6062	-1.5666	4.12064
2L:21971493-21972214	175.718	143.233	0.294893	32.4845	0.726896	32.4858	0.204404	1.2979
2L:22141957-22144269	155.386	98.4894	0.657819	56.8969	0.920585	56.9007	0.455965	2.53307	CG42748
2L:22155073-22156876	179.82	139.778	0.363414	40.0418	0.801349	40.0434	0.251899	1.6162	CG42748
2L:22159108-22162915	116.803	66.7519	0.807197	50.0511	0.914784	50.0576	0.559506	2.46256	CG42748
2L:22246040-22247744	240.978	176.846	0.446406	64.1317	0.885369	64.1333	0.309425	2.16604	CG3262,RpL21
2L:22535367-22540272	225.05	193.158	0.220468	31.8925	0.643181	31.8933	0.152817	1.03053	CG17490,RpL5,snoRNA:Psi28S-2996,lncRNA:CR46268
2L:22579936-22581038	359.701	256.889	0.485655	102.812	0.917761	102.814	0.33663	2.49812	Slmap
2L:23067162-23067974	176.215	240.679	-0.449769	64.4633	0.885598	-64.4649	-0.311756	2.16804	Spf45
2R:924937-925947	302.422	208.807	0.534395	93.6154	0.926641	93.6169	0.370415	2.61239	CG40498
2R:945028-945974	191.91	135.9	0.497884	56.0101	0.89173	56.0123	0.345107	2.22313	CG40498
2R:1071847-1072970	225.876	169.162	0.417131	56.7147	0.865165	56.7162	0.289133	2.00371	rl,lncRNA:CR41257
2R:1344345-1347846	58.5182	63.2953	-0.113213	4.77709	0.209033	-4.77843	-0.0784731	0.234499	lncRNA:CR44042,Yeti
2R:1512615-1516034	126.65	88.6179	0.515172	38.0317	0.845674	38.0352	0.35709	1.86869	Maf1
2R:2240734-2242776	131.634	59.8962	1.136	71.7381	0.961247	71.7471	0.787415	3.25054	CG17684
2R:2518140-2518935	30.0161	66.5426	-1.14854	36.5265	0.862214	-36.5445	-0.796108	1.98205	MFS17
2R:2532299-2533722	111.101	49.2247	1.17442	61.8761	0.949313	61.8872	0.814042	2.98209	MFS17
2R:3173558-3174673	38.9671	83.962	-1.10748	44.9949	0.904351	-45.0086	-0.767647	2.34707	dpr21
2R:3180031-3182904	81.0617	57.9304	0.484701	23.1313	0.716387	23.1364	0.335969	1.26014	dpr21
2R:4012916-4015254	135.932	182.621	-0.425973	46.6895	0.852824	-46.6915	-0.295262	1.91613	Haspin
2R:4234274-4237211	86.8669	109.5	-0.334046	22.6326	0.68112	-22.6351	-0.231543	1.14294	IntS3
2R:4321141-4321975	128.182	116.308	0.140237	11.8735	0.40117	11.8743	0.0972049	0.512778	Gprk1
2R:4375677-4376467	149.144	198.266	-0.410732	49.1221	0.84944	-49.1238	-0.284698	1.89339	Gprk1
2R:4429310-4431822	90.5797	55.2414	0.713439	35.3384	0.848346	35.3456	0.494518	1.88615	Gprk1
2R:4546875-4547816	336.721	623.468	-0.888759	286.746	0.985369	-286.748	-0.616041	4.22461	Stlk
2R:4611024-4613372	182.258	147.589	0.304396	34.6688	0.741908	34.6702	0.210991	1.35444
2R:4618529-4621061	143.454	155.022	-0.111883	11.5678	0.352952	-11.5684	-0.0775513	0.435334	CG17486,lncRNA:dntRL
2R:4689820-4690788	138.137	200.383	-0.536661	62.2461	0.909466	-62.2484	-0.371985	2.40203	Nipped-B
2R:4752865-4754356	191.908	113.945	0.752079	77.9633	0.951603	77.9669	0.521301	3.02832	conu
2R:4759496-4761290	161.352	155.634	0.0520508	5.71763	0.176972	5.71787	0.0360788	0.194765
2R:4783017-4785261	235.886	210.332	0.165419	25.5536	0.540662	25.5541	0.11466	0.777968	CG12547,CR43281,lncRNA:CR46064
2R:4787150-4788950	288.87	502.423	-0.798485	213.554	0.978117	-213.555	-0.553468	3.82205	CG12547
2R:4816967-4819386	87.3098	63.7577	0.453544	23.5521	0.719059	23.5565	0.314373	1.26961	CG17528
2R:5087849-5089400	77.071	76.899	0.00322201	0.171933	0.00801527	0.171963	0.00223333	0.00804756
2R:5092703-5095796	118.043	105.487	0.162238	12.5553	0.433868	12.5563	0.112455	0.568927	CG3107
2R:5120878-5123291	106.745	257.818	-1.27219	151.073	0.991501	-151.078	-0.881813	4.76784	gus
2R:5176346-5179411	106.509	93.8096	0.183162	12.699	0.453257	12.7003	0.126958	0.603776	Nipped-A
2R:5256092-5258090	51.0956	65.9794	-0.368815	14.8837	0.559695	-14.8883	-0.255643	0.820287	d4,lncRNA:CR41443
2R:5338362-5340719	51.741	98.6627	-0.931196	46.9217	0.909262	-46.9309	-0.645456	2.39978	CG10465
2R:5362196-5362691	289.384	473.958	-0.711777	184.575	0.969847	-184.576	-0.493366	3.50148	CG10417,lncRNA:CR42646
2R:5602776-5605090	145.738	111.581	0.38528	34.1564	0.794097	34.1586	0.267055	1.58035	Fis1
2R:5654672-5655548	255.895	296.632	-0.213123	40.737	0.640534	-40.7376	-0.147725	1.02314	CG1344,Not3
2R:5660543-5662925	201.878	145.406	0.473397	56.4719	0.88402	56.4739	0.328134	2.15434	Not3,lncRNA:CR45472
2R:5668956-5672456	132.119	116.67	0.179401	15.4488	0.49402	15.4498	0.124351	0.681259	CG8245,kune
2R:5698249-5699154	407.51	513.84	-0.334482	106.329	0.822341	-106.33	-0.231845	1.72789	Cndp2
2R:5701818-5702882	282.362	501.537	-0.828811	219.175	0.980204	-219.177	-0.574488	3.92225	vlc
2R:5706874-5710585	186.157	162.522	0.195888	23.6354	0.585242	23.6362	0.135779	0.880059	ap
2R:5711665-5713798	147.525	107.036	0.462855	40.4883	0.842926	40.4909	0.320827	1.85104	ap
2R:5715593-5716626	505.95	481.51	0.0714272	24.4394	0.272723	24.4395	0.0495095	0.318447	ap
2R:5717079-5719308	233.415	139.011	0.747692	94.4034	0.961221	94.4063	0.518261	3.24989	ap
2R:5725702-5726589	452.177	453.296	-0.00356887	1.11996	0.0180916	-1.11996	-0.00247375	0.0182573	ap
2R:5751599-5752205	390.838	360.452	0.116763	30.3859	0.430585	30.3862	0.0809343	0.563146
2R:5757352-5761570	204.939	245.877	-0.262743	40.9381	0.715623	-40.939	-0.18212	1.25746	CG7791,CG34200,Gp210
2R:5805342-5807928	214.476	101.191	1.08374	113.285	0.982697	113.29	0.751192	4.05689	dpr12
2R:5809430-5815493	122.605	119.362	0.0386659	3.2423	0.122901	3.24253	0.0268011	0.131135	dpr12
2R:5819778-5828274	117.935	65.1238	0.856738	52.8114	0.923486	52.8184	0.593845	2.57028	dpr12
2R:5835075-5836307	401.72	333.612	0.268019	68.108	0.74888	68.1085	0.185776	1.38183	dpr12
2R:5836397-5839724	214.059	136.503	0.649077	77.5559	0.941527	77.5586	0.449906	2.83919	dpr12
2R:5852946-5855530	141.873	113.805	0.318033	28.0678	0.722443	28.0696	0.220444	1.28173	dpr12
2R:5855660-5860649	79.1193	31.9022	1.31037	47.2171	0.914529	47.2352	0.908282	2.45958	dpr12
2R:5893940-5895409	97.1913	49.638	0.969383	47.5533	0.912214	47.5632	0.671925	2.43285	CG43366
2R:5899772-5901484	181.676	180.571	0.00879841	1.1046	0.0419338	1.10463	0.00609859	0.0428384	CG43366
2R:5926075-5929397	95.3442	50.4914	0.917108	44.8528	0.90112	44.8622	0.635691	2.31384	CG43366
2R:5937269-5939343	352.826	310.04	0.186504	42.7863	0.605802	42.7867	0.129275	0.930901	lncRNA:CR44126
2R:5971256-5972995	109.414	88.296	0.309372	21.1176	0.655878	21.1199	0.21444	1.06676	BubR1
2R:5974122-5976426	235.789	176.573	0.41723	59.2157	0.868117	59.2172	0.289201	2.02584	mle,BubR1
2R:5997176-5998835	89.6988	119.045	-0.408341	29.3458	0.769873	-29.3486	-0.283041	1.46912	Src42A
2R:6014376-6015421	427.301	947.351	-1.14865	520.05	0.994351	-520.051	-0.79618	5.1763	Act42A
2R:6016386-6017866	112.513	120.821	-0.10278	8.30804	0.295929	-8.30867	-0.0712414	0.350876	Act42A,Pngl
2R:6026713-6028315	96.4641	131.178	-0.44346	34.7138	0.81257	-34.7166	-0.307383	1.67435	SCAP
2R:6035841-6037037	395.542	314.63	0.330175	80.9121	0.81827	80.9127	0.22886	1.70523	SCAP,CG14591
2R:6037230-6038920	300.824	202.735	0.569326	98.089	0.937964	98.0907	0.394626	2.78005	SCAP,CG14591
2R:6041045-6042156	89.7857	112.206	-0.321588	22.42	0.674275	-22.4223	-0.222908	1.1217	CG14591,Tbce
2R:6063629-6065436	79.0275	89.8965	-0.185909	10.8689	0.420738	-10.8705	-0.128862	0.546	CCHa2-R
2R:6079082-6079945	303.537	377.023	-0.312782	73.4865	0.796896	-73.4872	-0.216804	1.59404	CG7849,SmydA-5,Ars2
2R:6081992-6083717	156.298	151.003	0.0497229	5.29508	0.172392	5.29532	0.0344653	0.189215	Ars2
2R:6095130-6095615	90.3541	251.779	-1.4785	161.425	0.99402	-161.432	-1.02482	5.11939	EcR
2R:6111159-6111980	183.371	298.121	-0.70113	114.75	0.962595	-114.752	-0.485986	3.28596	EcR
2R:6115395-6117313	184.421	103.561	0.832525	80.8601	0.958524	80.8643	0.577062	3.18264	EcR
2R:6122491-6127846	89.179	55.843	0.675326	33.3359	0.832952	33.3428	0.4681	1.78947	EcR
2R:6131218-6136789	123.69	139.198	-0.170411	15.5081	0.483461	-15.5091	-0.11812	0.660604	EcR,CG14589
2R:6145668-6149611	160.601	129.053	0.315524	31.5487	0.743537	31.5503	0.218705	1.36077	EcR
2R:6154827-6155712	63.7561	69.1223	-0.116587	5.36615	0.232366	-5.36741	-0.0808117	0.264443	EcR
2R:6171288-6171724	38.2646	271.507	-2.82691	233.242	0.998346	-233.259	-1.95946	6.40459	tRNA:Lys-CTT-1-5,tRNA:Arg-ACG-1-4
2R:6179197-6180464	166.419	102.7	0.696387	63.7191	0.93514	63.7229	0.482698	2.73552	tRNA:Arg-ACG-1-5,CG11211,CG8343
2R:6221116-6224121	152.364	138.175	0.141025	14.1889	0.42888	14.1896	0.097751	0.560157	bin3
2R:6238091-6240482	129.397	105.415	0.295724	23.982	0.680458	23.9838	0.20498	1.14087	bin3
2R:6241134-6242507	52.1006	102.048	-0.969877	49.9474	0.92	-49.9569	-0.672267	2.52573	bin3,Pld
2R:6512557-6513421	179.119	179.739	-0.0049819	0.619602	0.0161832	-0.619622	-0.00345319	0.0163156	jing
2R:6536135-6538963	110.129	50.1386	1.1352	59.9907	0.945573	60.0014	0.786864	2.91089	jing
2R:6541311-6544605	175.276	99.6176	0.81516	75.6589	0.953893	75.6633	0.565026	3.07679	jing
2R:6576244-6577295	105.561	76.0984	0.472139	29.4626	0.782977	29.4663	0.327262	1.52775	jing
2R:6586359-6588889	194.39	102.509	0.923203	91.8811	0.969949	91.8858	0.639915	3.50486	jing
2R:6591657-6594005	181.681	57.6195	1.65678	124.062	0.990204	124.073	1.14839	4.62574	jing
2R:6616875-6619479	121.17	60.1909	1.00941	60.979	0.945394	60.9873	0.699672	2.90762	jing,sisRNA:CR46361
2R:6624261-6625910	152.817	148.727	0.0391428	4.09045	0.137455	4.09064	0.0271317	0.147869	CG33919,Vha16-1
2R:6626830-6628898	244.054	236.356	0.0462418	7.69848	0.190636	7.69862	0.0320524	0.211507	Vha16-1
2R:6633900-6636681	146.783	297.606	-1.01972	150.823	0.98659	-150.826	-0.706814	4.31178	Trap1,Bap170,Vha16-1
2R:6636774-6637231	51.9654	282.076	-2.44046	230.111	0.998219	-230.124	-1.6916	6.33048	Trap1,Bap170
2R:6643924-6646142	79.0091	69.3259	0.188625	9.68325	0.38972	9.68509	0.130745	0.493838	Fmo-2
2R:6651310-6653709	63.0541	79.4915	-0.33421	16.4374	0.588295	-16.4408	-0.231657	0.887449	Debcl,Opbp
2R:6658907-6661284	268.255	194.62	0.462942	73.6345	0.895191	73.6359	0.320887	2.25561	sced,Dpit47,Adf1
2R:6662497-6663644	139.961	193.174	-0.464878	53.2131	0.875394	-53.2152	-0.322229	2.0826	Dpit47,lncRNA:CR45128,Adf1
2R:6666135-6667655	315.001	212.363	0.568823	102.638	0.939186	102.639	0.394278	2.79993	CG15908,Adf1
2R:6669295-6672020	73.0656	74.2066	-0.0223558	1.14103	0.0497455	-1.14125	-0.0154959	0.0510255	CG15908,CG9410,Hsepi
2R:6685669-6687613	142.308	97.2522	0.54921	45.0554	0.877634	45.0588	0.380683	2.10074	CG15909,Rpp25,Tdc2
2R:6693832-6696425	120.761	113.4	0.0907322	7.36085	0.266743	7.36141	0.0628908	0.310259	Rab2,Rpp25,CG3270,Mob4
2R:6696521-6697532	289.168	452.246	-0.645199	163.078	0.961476	-163.079	-0.447218	3.25647	Rab2,Mob4
2R:6700134-6701560	101.064	90.1867	0.164288	10.8777	0.403181	10.8789	0.113875	0.516141	Rab2,chk,CG45092
2R:6704035-6704697	84.6455	88.4492	-0.0634153	3.80367	0.156412	-3.8042	-0.0439561	0.170091	chk,CG45092
2R:6714483-6716465	106.729	178.007	-0.73799	71.2788	0.946081	-71.2826	-0.511536	2.92028	chk,Zip42C.1,CG45092
2R:6744617-6746265	66.7135	62.5779	0.0923249	4.13558	0.180382	4.13661	0.0639947	0.198917	phtf,Mccc2
2R:6753979-6756552	196.385	212.459	-0.113502	16.0743	0.381094	-16.0747	-0.0786735	0.479802	Eb1,CG3420
2R:6758044-6759895	50.6383	80.5893	-0.67036	29.951	0.804504	-29.9585	-0.464658	1.63221	CG3420,CG9436,Epac
2R:6763067-6764659	159.426	134.882	0.241192	24.5443	0.638906	24.5454	0.167182	1.01862	Epac
2R:6765232-6767145	401.785	490.643	-0.28825	88.8579	0.779567	-88.8584	-0.199799	1.51216	Epac
2R:6779961-6780909	64.1464	156.247	-1.28439	92.1007	0.978244	-92.1096	-0.89027	3.82788	Cyp6a2,Epac
2R:6781127-6783202	73.4229	73.4424	-0.000384582	0.0195751	0.000966921	-0.0195789	-0.000266572	0.000967389	Cyp6a2,Epac
2R:6792913-6795048	210.315	259.031	-0.300573	48.7159	0.772366	-48.7169	-0.208341	1.48002	Epac
2R:6797908-6798673	566.116	875.105	-0.62836	308.99	0.96056	-308.99	-0.435546	3.23297	Epac
2R:6807796-6808636	119.107	107.619	0.146314	11.4871	0.404885	11.488	0.101417	0.519001	SdhB,CG15237
2R:6811575-6814357	169.526	142.081	0.254795	27.4451	0.665598	27.4463	0.17661	1.09541	koi
2R:6814443-6817105	85.0039	86.4387	-0.0241476	1.43476	0.0594402	-1.43496	-0.0167378	0.0612801	koi
2R:6819443-6821178	324.001	134.553	1.26783	189.448	0.993868	189.452	0.87879	5.09418	lncRNA:CR44442
2R:6846595-6847712	343.249	119.957	1.51673	223.291	0.996514	223.296	1.05132	5.659
2R:6858325-6860105	226.897	82.5739	1.45828	144.323	0.992239	144.33	1.0108	4.85867
2R:6863240-6864299	160.647	193.515	-0.268555	32.8685	0.708397	-32.8696	-0.186148	1.23236	coro
2R:6895384-6900286	169.095	169.156	-0.000524765	0.0615177	0.00259542	-0.0615199	-0.000363739	0.00259879	CG30158
2R:6908451-6910767	63.9046	120.181	-0.911223	56.2769	0.933206	-56.2843	-0.631612	2.70614	CG30158
2R:6936180-6938800	258.225	147.621	0.806734	110.604	0.970331	110.607	0.559185	3.51765	mim
2R:6941655-6943872	81.4764	130.816	-0.683081	49.3393	0.906285	-49.344	-0.473476	2.3675	mim,CheB42c,CheB42b
2R:6962946-6964278	123.009	160.437	-0.383237	37.4273	0.803384	-37.4293	-0.265639	1.6265	mim,CheB42c
2R:6972658-6974487	114.485	117.299	-0.0350341	2.81416	0.112952	-2.81438	-0.0242838	0.119856	vimar,Cyp6u1,Ufsp1
2R:6977188-6978399	121.186	174.096	-0.522658	52.9097	0.89112	-52.9123	-0.362279	2.21751	vimar
2R:7025046-7025831	93.5415	129.855	-0.473228	36.3139	0.827684	-36.317	-0.328017	1.75843	Tsp42Ef,lncRNA:CR44172
2R:7058659-7060061	52.5886	77.5917	-0.561152	25.0031	0.745725	-25.0094	-0.388961	1.36934	Pgant3
2R:7060940-7061784	360.4	443.486	-0.299288	83.0856	0.788651	-83.0861	-0.207451	1.55425	Pgant3,Tsp42Eq
2R:7141549-7143104	181.355	147.278	0.300266	34.0761	0.739822	34.0774	0.208129	1.34639
2R:7161102-7163605	91.5428	88.437	0.0497971	3.10585	0.129338	3.10625	0.0345167	0.138502	pk
2R:7241210-7245381	223.216	115.584	0.949502	107.632	0.977252	107.636	0.658145	3.78327	Adk3
2R:7246911-7249565	81.8493	72.3635	0.177708	9.48579	0.380814	9.48746	0.123178	0.47935	Gadd45
2R:7249718-7251925	111.236	71.297	0.641713	39.9392	0.868168	39.9444	0.444802	2.02623	Gadd45
2R:7254571-7255980	188.753	101.157	0.899909	87.5963	0.967099	87.6009	0.623769	3.41426	lncRNA:CR45280
2R:7258666-7260567	22.6143	41.934	-0.890888	19.3198	0.666005	-19.3403	-0.617517	1.09663	CG1850
2R:7277567-7281150	93.3583	66.0278	0.499705	27.3305	0.765852	27.3351	0.346369	1.4518	Br140,Incenp
2R:7299300-7301724	70.1384	123.792	-0.819641	53.6535	0.923562	-53.6598	-0.568132	2.57128	pwn
2R:7378516-7380738	144.159	187.839	-0.381833	43.6796	0.823079	-43.6813	-0.264666	1.73205	Dscam1
2R:7387424-7388972	68.2194	89.2564	-0.387772	21.0369	0.677379	-21.0405	-0.268783	1.13128	cos,Dhx15
2R:7393691-7394539	97.2636	91.8149	0.083172	5.44872	0.216005	5.44935	0.0576504	0.243353	Gr43a,asRNA:CR44201,Glo1
2R:7401765-7403005	83.7872	145.179	-0.79303	61.3917	0.937328	-61.3968	-0.549687	2.76984	CG11112,CG11113,Eaf,CG43123
2R:7441195-7442679	77.5457	115.702	-0.577293	38.1561	0.85402	-38.1605	-0.400149	1.92429	CG11123,sPLA2
2R:7443828-7445350	83.5134	114.205	-0.451547	30.6916	0.789975	-30.695	-0.312988	1.56053	CG11123,sPLA2,kappaB-Ras,fa2h,CG30503
2R:7449074-7451801	66.9423	58.2068	0.20173	8.73548	0.363486	8.7378	0.139829	0.451749	CG11125,fa2h,lncRNA:CR45320
2R:7459707-7461074	82.8839	67.9359	0.286919	14.948	0.549567	14.9508	0.198877	0.797547	Inos,CG11141
2R:7463526-7464589	241.278	241.437	-0.000948981	0.158761	0.00763359	-0.158764	-0.000657784	0.00766287	CG11141,CG11127,p47
2R:7464681-7465817	185.461	323.816	-0.80406	138.355	0.973969	-138.357	-0.557332	3.64849	CG11127,p47
2R:7472257-7475231	132.77	136.563	-0.040642	3.79343	0.133486	-3.79365	-0.0281709	0.143277	Aldh-III
2R:7483563-7485110	300.026	238.635	0.330279	61.3906	0.811145	61.3914	0.228932	1.66678	wech
2R:7485558-7487287	204.347	106.878	0.935056	97.4692	0.973232	97.4736	0.648131	3.62053	wech
2R:7491303-7493912	107.166	100.62	0.090934	6.54629	0.251399	6.54692	0.0630306	0.28955	CG1620,Coop,asRNA:CR43723
2R:7495560-7496892	151.842	288.236	-0.924679	136.394	0.980789	-136.397	-0.640939	3.95226	dpa,CG1620
2R:7498963-7501699	128.631	115.437	0.156129	13.1937	0.443155	13.1946	0.108221	0.585469	dpa,didum
2R:7503871-7505731	188.176	244.93	-0.380287	56.7541	0.844122	-56.7554	-0.263595	1.85868	didum
2R:7506247-7507530	71.4307	76.0116	-0.0896748	4.58088	0.195954	-4.58175	-0.0621579	0.218099	mEFTu2,didum
2R:7524935-7526101	51.0512	100.761	-0.980924	49.71	0.919695	-49.7197	-0.679925	2.52192	Drat,Orc1
2R:7532120-7534599	202.939	135.852	0.579005	67.0865	0.922417	67.089	0.401336	2.55641	Drat,Cyt-b5,lncRNA:CR44209
2R:7536924-7539354	177.769	137.325	0.372403	40.4433	0.808219	40.445	0.25813	1.6514	Gpo2,CG1598,Corin,Cyt-b5
2R:7547721-7550823	87.2935	108.167	-0.309312	20.8734	0.65285	-20.8756	-0.214399	1.058	Corin
2R:7553401-7555022	266.363	196.046	0.442205	70.3175	0.885623	70.3189	0.306513	2.16826	Corin
2R:7557914-7559540	115.828	78.8501	0.5548	36.978	0.844682	36.9821	0.384558	1.86228	Corin
2R:7559790-7562766	80.9522	92.7707	-0.196599	11.8185	0.447557	-11.8201	-0.136272	0.593405	Corin
2R:7564615-7565465	94.5718	98.4161	-0.0574849	3.84434	0.157405	-3.84477	-0.0398455	0.171268	boca,Corin,Rpe
2R:7571725-7573312	43.3181	71.1541	-0.715975	27.8359	0.783206	-27.8451	-0.496276	1.52881	Vps13
2R:7576008-7576919	50.438	116.149	-1.20339	65.7109	0.95542	-65.7219	-0.834127	3.11047	Vps13
2R:7577478-7578444	42.6187	101.096	-1.24617	58.4776	0.943868	-58.4908	-0.86378	2.88004	Vps13,asRNA:CR45130
2R:7580425-7582186	192.808	101.093	0.931474	91.7142	0.970305	91.719	0.645648	3.51679	blow,Vps13,asRNA:CR45130
2R:7582951-7585274	64.4353	35.2162	0.87161	29.2191	0.800458	29.232	0.604154	1.61173	blow
2R:7602601-7604384	112.842	263.14	-1.22152	150.298	0.990738	-150.303	-0.846695	4.68183	HisT
2R:7649641-7651180	126.365	105.427	0.261354	20.9381	0.627074	20.9397	0.181157	0.986375	CG17985,M7BP
2R:7652234-7653581	205.875	260.603	-0.34008	54.7272	0.813893	-54.7282	-0.235725	1.68143	Rpt1,CG17985,M7BP
2R:7655061-7655573	23.7051	475.325	-4.32564	451.62	0.999949	-451.641	-2.99831	9.88583	CG17985,CG30491
2R:7655653-7656010	33.6106	318.707	-3.24524	285.097	0.999466	-285.115	-2.24943	7.53446	CG17985,CG30491,CG30495
2R:7666508-7668884	492.413	277.633	0.826688	214.78	0.980153	214.781	0.573017	3.91969	Rdh1,DCTN4-p62
2R:7670997-7672840	82.3506	93.2862	-0.179885	10.9356	0.417226	-10.9371	-0.124687	0.539957	CG12826,mRpL52
2R:7673934-7674917	116.338	253.126	-1.12153	136.788	0.987201	-136.793	-0.777387	4.35839	mRpL52,CG12107,U2A
2R:7675084-7676775	15.3369	68.6496	-2.16225	53.3128	0.933537	-53.3566	-1.49876	2.71111	mRpL52,CG12107,U2A,LRR
2R:7677604-7681555	102.688	70.5174	0.542223	32.1711	0.814275	32.1757	0.375841	1.68349	LRR
2R:7682624-7685530	89.244	74.3947	0.262554	14.8492	0.538193	14.8515	0.181989	0.772609	LRR
2R:7698861-7700900	295.215	106.33	1.47321	188.884	0.995318	188.89	1.02115	5.36404	LRR,Coq9,CG30496
2R:7710617-7711773	127.468	176.95	-0.473207	49.4819	0.872417	-49.4842	-0.328002	2.05899	CG1941,Dgat2,mir-4909
2R:7712884-7714635	104.674	74.2632	0.495181	30.4106	0.796056	30.4146	0.343233	1.58991	CG1941,Dgat2,CG1946
2R:7728006-7730189	162.786	108.182	0.589513	54.6036	0.90743	54.6068	0.408619	2.37979	Gdap2
2R:7730809-7733305	226.018	152.408	0.568503	73.6104	0.925674	73.6126	0.394056	2.5993	Gdap2
2R:7755411-7757298	147.58	174.287	-0.239967	26.7069	0.651018	-26.7079	-0.166332	1.05273	CG46385
2R:7758750-7759582	301.578	420.122	-0.478277	118.544	0.916412	-118.545	-0.331516	2.48186	CG46385
2R:7792147-7793025	206.26	186.496	0.145321	19.7642	0.481221	19.7648	0.100729	0.656278	Gapdh1,PolZ1,CG12824
2R:7799360-7804395	169.283	165.378	0.0336719	3.90525	0.115394	3.9054	0.0233396	0.122613	PolZ1,Nop17l
2R:7807816-7810977	229.239	149.823	0.613599	79.4167	0.936514	79.4191	0.425314	2.75694	sax,TTLL12
2R:7837048-7840515	114.855	74.9156	0.616477	39.9395	0.866336	39.9443	0.42731	2.01243	Dgk
2R:7854173-7858400	113.694	68.2613	0.736016	45.4326	0.89771	45.4386	0.510167	2.27994	Dgk
2R:7878110-7879901	43.7574	149.946	-1.77684	106.188	0.986489	-106.203	-1.23161	4.30422	Dgk
2R:7907624-7910911	93.5171	75.5206	0.308359	17.9964	0.612265	17.9991	0.213738	0.947432	CG30377
2R:7916873-7919025	168.55	140.757	0.259968	27.7927	0.676539	27.794	0.180196	1.12868	Cul1,CG12159
2R:7919252-7920683	161.089	163.303	-0.0196886	2.21346	0.0755471	-2.21355	-0.0136471	0.0785531	Cul1,Or43b
2R:7921364-7922242	42.8549	155.218	-1.85676	112.363	0.988626	-112.378	-1.28701	4.47642	Cul1,Or43b,Kdm4A
2R:7923330-7924345	103.317	90.5501	0.190292	12.7671	0.461934	12.7685	0.1319	0.619774	Or43b,Kdm4A
2R:7932032-7933587	20.1198	112.238	-2.47988	92.1186	0.98112	-92.152	-1.71892	3.96963	rnh1,drosha
2R:7934906-7935566	43.3508	94.3889	-1.12256	51.0381	0.924682	-51.0504	-0.778097	2.58604	drosha
2R:7937567-7939188	461.255	405.915	0.184387	55.3401	0.588753	55.3404	0.127807	0.888562	drosha,CG8728,CG30379,CG30380
2R:7949301-7950783	133.018	215.768	-0.697857	82.7497	0.95056	-82.7527	-0.483717	3.00699	CG14764,azot,CG30378
2R:7956544-7956923	54.4318	387.397	-2.83129	332.966	0.999644	-332.978	-1.9625	7.93992	CG14764,CG2906
2R:7958818-7961231	85.0021	85.7139	-0.0120302	0.711768	0.0302545	-0.71187	-0.00833868	0.0307216	Septin5,CG2906,CG2915
2R:7963535-7964056	64.2136	149.138	-1.2157	84.9248	0.973308	-84.9335	-0.84266	3.62339	nito
2R:7964161-7966126	322.241	364.423	-0.177475	42.1822	0.584046	-42.1825	-0.123016	0.87718	nito,CG14763
2R:7966563-7968010	381.465	123.065	1.63213	258.4	0.997888	258.405	1.13131	6.16014	nito,CG14763,CG8726
2R:7968927-7971838	243.396	190.802	0.351228	52.5939	0.818677	52.595	0.243453	1.70747	CSN4,nito,CG14763,CG8726
2R:7972817-7975874	37.9804	78.2723	-1.04325	40.2919	0.88229	-40.3054	-0.723124	2.13953	CSN4,CG8726,ACC
2R:7975991-7976656	15.1188	77.6493	-2.36063	62.5305	0.953893	-62.5751	-1.63627	3.07679	ACC
2R:7977371-7978325	23.7492	77.536	-1.70699	53.7868	0.934631	-53.8139	-1.18319	2.72771	ACC
2R:7978731-7980057	74.4957	79.4664	-0.0931879	4.9707	0.208804	-4.97158	-0.0645929	0.23421	ACC
2R:7980186-7982767	159.775	117.226	0.446746	42.5487	0.848015	42.5511	0.309661	1.88398	ACC
2R:7989381-7990765	141.834	327.088	-1.20548	185.254	0.992621	-185.258	-0.835572	4.9091	ACC,Nup44A
2R:7999719-8004102	117.929	45.8137	1.36406	72.1151	0.964046	72.128	0.945498	3.32551	Odc1,CG11191
2R:8005808-8009391	97.3357	62.1369	0.647519	35.1988	0.844478	35.2048	0.448826	1.86097	Odc1,Odc2,CG14762
2R:8010733-8012086	204.177	129.802	0.65351	74.3753	0.939211	74.3782	0.452979	2.80035	CG14762
2R:8012162-8013456	248.665	155.59	0.676456	93.0751	0.953639	93.0775	0.468884	3.07129	CG14762
2R:8055754-8056537	46.5354	121.398	-1.38334	74.8625	0.966539	-74.8752	-0.95886	3.39739	CG12769
2R:8062646-8065135	422.021	526.251	-0.318438	104.231	0.812112	-104.231	-0.220725	1.67191	CG12769
2R:8067459-8070658	131.801	114.16	0.207308	17.6414	0.550382	17.6426	0.143695	0.799356	lig,CG17977
2R:8071058-8073582	76.2894	43.6159	0.80663	32.6736	0.831196	32.6835	0.559113	1.77902	lig
2R:8075486-8077046	220.24	212.353	0.0526142	7.88732	0.191476	7.8875	0.0364694	0.212545	lig
2R:8077863-8080297	98.173	152.693	-0.637238	54.5203	0.91374	-54.524	-0.4417	2.45039	lig,Vps28,slv
2R:8081433-8085141	82.9028	65.0144	0.350661	17.8884	0.619593	17.8918	0.243059	0.966513	slv,sut1
2R:8092821-8094146	245.081	236.852	0.0492692	8.22839	0.192824	8.22854	0.0341508	0.214214	sand
2R:8097406-8098447	189.691	279.517	-0.559279	89.8251	0.932697	-89.8269	-0.387663	2.69855	sand,uno,Tmem63
2R:8101092-8102111	294.728	123.574	1.25401	171.154	0.992799	171.158	0.869212	4.93353	Tmem63,Cul4
2R:8105626-8107340	236.607	250.607	-0.0829351	14.0002	0.295598	-14.0005	-0.0574862	0.350406	Cul4,udd
2R:8115378-8118136	126.574	101.827	0.313869	24.7476	0.69257	24.7496	0.217557	1.17951	Asap
2R:8121854-8125227	185.423	112.357	0.722725	73.0655	0.945649	73.069	0.500955	2.91229	Nup50,coil,Asap
2R:8126787-8128292	250.89	369.572	-0.558798	118.681	0.940305	-118.683	-0.387329	2.81851	coil,Socs44A
2R:8129870-8130908	39.9821	96.2562	-1.26753	56.2741	0.939262	-56.2884	-0.878582	2.80119	Pabp2,Socs44A,CG42516,Pbp49
2R:8137808-8139198	107.287	96.7992	0.148413	10.4882	0.387481	10.4892	0.102872	0.490175	Lpin
2R:8139501-8141593	157.373	137.164	0.198286	20.2089	0.563766	20.2099	0.137441	0.829576	Lpin
2R:8152380-8156443	62.1701	64.044	-0.0428412	1.87384	0.0822137	-1.87433	-0.0296952	0.0857907	kermit,CR30374,Lpin,lncRNA:CR44068
2R:8160116-8162966	87.8311	78.892	0.154853	8.93909	0.352774	8.94043	0.107336	0.435059	Rs1,CG8708,RagC-D
2R:8163011-8164101	186.964	228.251	-0.287859	41.2868	0.751399	-41.2878	-0.199529	1.39191	Rs1,RagC-D,CG30373
2R:8167179-8168857	117.374	107.4	0.128127	9.97463	0.360763	9.97545	0.0888108	0.447481	Rs1,Gasz
2R:8174169-8176018	451.816	393.086	0.200889	58.7296	0.632494	58.7299	0.139246	1.00101	CG14757,LRP1
2R:8181475-8183566	118.234	84.5489	0.483789	33.6852	0.815623	33.6887	0.335337	1.69077	LRP1
2R:8192969-8195084	230.31	188.66	0.287791	41.6503	0.75201	41.6513	0.199481	1.39437	LRP1
2R:8197810-8199482	243.579	136.214	0.838516	107.365	0.971908	107.368	0.581215	3.57228	LRP1
2R:8211893-8213864	110.967	149.277	-0.427867	38.3106	0.825954	-38.313	-0.296575	1.74844	LRP1
2R:8214059-8215094	101.237	147.506	-0.543031	46.2685	0.879491	-46.2717	-0.3764	2.11603	LRP1
2R:8215734-8217591	186.126	147.001	0.340453	39.1248	0.78626	39.1263	0.235984	1.54299	LRP1
2R:8218091-8220127	123.055	133.609	-0.118719	10.5545	0.358092	-10.5552	-0.08229	0.44331	LRP1
2R:8220187-8223162	105.95	110.734	-0.0637093	4.7836	0.180178	-4.78403	-0.0441599	0.198668	LRP1
2R:8224029-8227175	154.876	127.147	0.284609	27.7284	0.694656	27.7298	0.197276	1.18632	LRP1,CG34217
2R:8236820-8241413	207.746	133.21	0.641116	74.5359	0.937837	74.5387	0.444388	2.778	pnut,lncRNA:CR44276,lncRNA:CR44445
2R:8241947-8243544	148.331	168.637	-0.185097	20.3056	0.55112	-20.3064	-0.1283	0.800999	lncRNA:CR44276,lncRNA:CR44445
2R:8246685-8247268	618.424	863.704	-0.481941	245.28	0.920738	-245.281	-0.334056	2.535	lncRNA:CR44446
2R:8255890-8257818	73.2494	195.572	-1.41681	122.322	0.988855	-122.331	-0.982057	4.49676	CG14760
2R:8348959-8350865	85.5018	168.764	-0.980978	83.2619	0.967252	-83.2677	-0.679962	3.41891	pdm3
2R:8357439-8358748	35.6546	175.745	-2.30132	140.09	0.993461	-140.109	-1.59515	5.0299	CG11635,hubl,spaw,pdm3
2R:8360581-8363043	58.1997	173.067	-1.57224	114.867	0.988142	-114.878	-1.0898	4.43479	cola,hubl,spaw,swif,whip,pdm3
2R:8364241-8365285	33.1654	118.693	-1.83948	85.5274	0.977074	-85.5472	-1.27503	3.77547	boly,cola,swif,pdm3
2R:8390128-8392012	13.4151	66.3655	-2.30658	52.9504	0.932646	-53.0006	-1.5988	2.6978	pdm3
2R:8481253-8484791	99.0011	89.814	0.140504	9.18711	0.353562	9.18818	0.0973902	0.436279	mtt
2R:8595197-8596314	56.9449	86.7848	-0.607875	29.8399	0.800331	-29.8461	-0.421347	1.61109	CG8736,Lnpk
2R:8600445-8601093	109.345	451.133	-2.04467	341.788	0.999313	-341.794	-1.41726	7.28314	Lnpk,rgr
2R:8615970-8617947	174.758	198.434	-0.183304	23.6764	0.553104	-23.6771	-0.127057	0.80543	Cirl
2R:8618046-8618605	27.4867	92.5474	-1.75146	65.0607	0.957226	-65.0843	-1.21402	3.15184	Cirl
2R:8619817-8622756	213.346	178.659	0.255981	34.6863	0.703104	34.6873	0.177433	1.21437	Cirl
2R:8624709-8626843	70.6312	148.484	-1.07193	77.8529	0.965267	-77.8603	-0.743006	3.36007	Vps25,Cirl,beta3GalTII
2R:8631340-8632808	61.5221	81.8972	-0.412709	20.3751	0.669542	-20.3793	-0.286068	1.10728	CG8635
2R:8654829-8656215	391.44	115.896	1.75596	275.544	0.99855	275.55	1.21714	6.53593	ptc
2R:8657569-8659015	381.014	236.061	0.690686	144.953	0.965115	144.955	0.478747	3.35568	ptc
2R:8679372-8680729	106.611	120.822	-0.18053	14.2113	0.477913	-14.2125	-0.125134	0.649922	CG30355,Acsl
2R:8706922-8708214	53.3597	49.9196	0.0961458	3.44016	0.155471	3.4415	0.0666432	0.168976	CG14744
2R:8716957-8717697	49.0426	189.279	-1.9484	140.236	0.993206	-140.249	-1.35053	4.99173	CG14767,PGRP-SC2
2R:8717779-8723420	147.833	130.829	0.176281	17.0035	0.511221	17.0045	0.122189	0.715846	gcl,CG14767,PGRP-SC2,CG30357
2R:8725793-8727281	186.62	542.672	-1.53998	356.052	0.998193	-356.056	-1.06743	6.3163	gcl,snoRNA:gcl-a
2R:8727450-8729031	145.118	213.526	-0.557191	68.4086	0.91972	-68.4109	-0.386215	2.52224	gcl,CG30356,stmA
2R:8729177-8731235	95.4292	255.491	-1.42077	160.061	0.993486	-160.068	-0.984801	5.0338	gcl,CG30356,stmA
2R:8823799-8826262	127.485	108.945	0.226735	18.5406	0.578397	18.5419	0.15716	0.863691	sns,CG30350
2R:8868847-8870603	78.5133	80.4275	-0.0347519	1.9142	0.0802545	-1.91452	-0.0240882	0.0836582	RyR
2R:8880990-8881727	12.9674	48.8547	-1.91361	35.8873	0.859924	-35.9383	-1.32641	1.96557	RyR
2R:8891262-8892359	173.145	449.608	-1.37668	276.462	0.996819	-276.466	-0.954244	5.75067	DCTN2-p50,CG8272
2R:8897602-8899533	78.7597	121.733	-0.628186	42.9729	0.880127	-42.9775	-0.435425	2.12132	ana2,Sec31,CG13751,asRNA:CR45202
2R:8899620-8902204	176.098	163.77	0.104708	12.3281	0.339466	12.3285	0.0725782	0.414706	Ggamma1,ana2,Sec31,CG13751,MrgBP
2R:8904026-8905420	266.027	395.63	-0.57258	129.603	0.943791	-129.604	-0.396882	2.87868	Ggamma1,CCT8
2R:8906282-8907081	192.33	167.038	0.203411	25.2924	0.592545	25.2933	0.140994	0.897824	CG30349,CCT8
2R:8916070-8918610	123.234	114.206	0.109765	9.02831	0.321221	9.02898	0.0760836	0.38746	lin,CG8248,CG34219
2R:8918941-8920633	382.823	261.399	0.550424	121.424	0.938168	121.425	0.381525	2.78333	lin,CG8248,Spt,CG34219
2R:8921624-8922394	254.916	305.947	-0.26326	51.031	0.727684	-51.0317	-0.182478	1.30079	Spt,CG8243
2R:8928069-8929295	297.462	811.104	-1.44718	513.643	0.998015	-513.645	-1.00311	6.22227	AIMP1,PAN2
2R:8930893-8933723	94.56	72.3302	0.386632	22.2298	0.693664	22.2332	0.267993	1.18307	PAN2,BaraB,FANCI
2R:8944537-8945137	102.829	230.687	-1.16569	127.858	0.98687	-127.863	-0.807995	4.33287	CG8230,lncRNA:CR44274
2R:8949299-8951334	302.114	229.281	0.397977	72.8331	0.867303	72.8342	0.275856	2.01969	CG8229,Tom7,CG33199
2R:8952877-8953755	104.923	69.6124	0.591916	35.3107	0.840483	35.3156	0.410285	1.83561	babo,Tom7
2R:8959039-8961080	96.7877	107.507	-0.151531	10.719	0.391908	-10.7201	-0.105033	0.49743	babo
2R:8963537-8965294	210.978	123.685	0.770417	87.2927	0.959313	87.2961	0.534013	3.20185	babo,spab
2R:9006608-9008472	85.9932	137.752	-0.679781	51.759	0.911832	-51.7635	-0.471189	2.42851	CG8172,Np
2R:9087307-9088789	120.744	104.887	0.203118	15.8572	0.520178	15.8585	0.140791	0.73434	Dbp45A,CG13742,Nadk2
2R:9091697-9092764	253.877	172.695	0.555899	81.1814	0.928473	81.1833	0.38532	2.63768	Nadk2,Boot
2R:9097942-9098932	140.967	287.918	-1.0303	146.951	0.986387	-146.955	-0.714152	4.29671	CG8078,CG8777,Uhg4,snoRNA:Or-CD2
2R:9100777-9102555	23.3588	67.9019	-1.53949	44.5432	0.904707	-44.5697	-1.06709	2.3508	Vang,CG8777
2R:9107350-9109335	117.959	135.244	-0.197273	17.2845	0.53771	-17.2856	-0.136739	0.771563	Vang,Pgm2a
2R:9114154-9115325	124.73	329.372	-1.40091	204.642	0.995394	-204.647	-0.971036	5.38048	Su(var)2-10,Mys45A,Phax
2R:9122501-9125280	150.18	194.287	-0.371497	44.107	0.818372	-44.1085	-0.257502	1.70579	Su(var)2-10,CG18659,GstE13
2R:9125799-9126754	138.012	183.571	-0.41154	45.5585	0.842087	-45.5604	-0.285258	1.84571	CG18659
2R:9131248-9134325	151.818	163.808	-0.109665	11.9902	0.357201	-11.9907	-0.076014	0.441923	CG18659,Hydr1
2R:9134686-9135199	48.5524	209.857	-2.11179	161.304	0.995496	-161.318	-1.46378	5.40283	Hydr1,alc
2R:9136961-9137751	141.487	298.11	-1.07518	156.624	0.988677	-156.627	-0.745258	4.48091	CG8788,alc,CG44286
2R:9138546-9140548	60.2995	113.099	-0.907361	52.799	0.925038	-52.8068	-0.628935	2.59078	CG8788,alc,CG44286
2R:9141945-9144960	117.384	138.979	-0.243635	21.5953	0.617684	-21.5967	-0.168875	0.961509	CG8788,Prp38,CG30344,shrb,CG44286
2R:9169186-9170067	163.141	221.201	-0.439244	58.0607	0.875573	-58.0623	-0.30446	2.08403	Rme-8
2R:9176753-9180653	99.0307	62.881	0.655251	36.1497	0.850254	36.1556	0.454186	1.89882	Rab32,Rme-8
2R:9185425-9186121	25.2237	216.631	-3.10239	191.407	0.997252	-191.432	-2.15041	5.89685	Rab32,CG8026,lncRNA:CR44284,CG45085
2R:9187256-9191293	116.864	74.0168	0.658902	42.8469	0.882621	42.8519	0.456716	2.14235	Rab32,CG8026,CG45085
2R:9206739-9211838	108.507	63.0116	0.784097	45.4953	0.899237	45.502	0.543494	2.29498	Gnptab,VhaAC45
2R:9217445-9220400	68.0885	58.1361	0.227977	9.95241	0.408117	9.95502	0.158022	0.524446
2R:9286661-9287162	105.784	462.26	-2.12758	356.476	0.999466	-356.482	-1.47473	7.53446	CG2063,Cog6
2R:9289777-9290997	61.1272	87.2022	-0.51255	26.075	0.753511	-26.08	-0.355273	1.40044	Mad1,Drep2,Cog6
2R:9292937-9298344	82.6876	91.1836	-0.141104	8.49604	0.335929	-8.49721	-0.0978059	0.409366	Drep2
2R:9299975-9302177	125.205	72.7307	0.783661	52.4747	0.91916	52.4806	0.543192	2.51529	Drep2,Myd88
2R:9303891-9305015	178.907	116.274	0.621687	62.6335	0.924631	62.6366	0.430921	2.58536	Myd88
2R:9337028-9341017	236.256	157.622	0.583878	78.6335	0.930662	78.6357	0.404713	2.66876	CG13739,CG13954
2R:9368643-9369718	737.71	615.573	0.261124	122.137	0.739771	122.137	0.180997	1.34619	CG13954
2R:9373622-9376985	235.629	264.329	-0.165818	28.7	0.547455	-28.7005	-0.114936	0.792869	CG13954
2R:9396782-9397757	53.5796	98.2764	-0.875161	44.6968	0.899695	-44.7054	-0.606616	2.29954	Non1,ODA-Dnal1
2R:9419613-9420597	466.181	490.641	-0.0737777	24.4601	0.272723	-24.4602	-0.0511388	0.318447
2R:9422490-9422833	144.309	202.57	-0.489253	58.2603	0.892952	-58.2623	-0.339124	2.23447	CG13955
2R:9430671-9431744	481.764	446.233	0.110527	35.5303	0.403104	35.5305	0.0766117	0.516013	Pdk
2R:9432252-9432880	169.274	176.154	-0.0574775	6.88008	0.209924	-6.88032	-0.0398403	0.235626	Pdk
2R:9435430-9436505	161.748	164.092	-0.0207549	2.34376	0.0771501	-2.34385	-0.0143862	0.0802887	Pdk,ced-6
2R:9510616-9511210	50.3857	67.9712	-0.431907	17.5854	0.623028	-17.5907	-0.299375	0.975584	brp
2R:9522670-9525874	136.818	82.0804	0.737149	54.7377	0.922799	54.7427	0.510953	2.56134	brp
2R:9532685-9533883	165.101	123.592	0.417762	41.5089	0.834733	41.511	0.28957	1.80019	brp
2R:9534852-9536386	92.9207	91.5273	0.0217982	1.39342	0.0580916	1.39359	0.0151094	0.0598473	brp
2R:9545971-9547193	415.298	688.471	-0.72925	273.173	0.974198	-273.174	-0.505478	3.65732	CG1888
2R:9548678-9550671	507.653	547.604	-0.10929	39.951	0.403842	-39.9511	-0.0757542	0.51725	CG1888
2R:9556387-9557706	495.079	782.232	-0.659938	287.153	0.965725	-287.154	-0.457434	3.37334
2R:9559448-9560858	299.823	156.857	0.934658	142.966	0.982036	142.969	0.647855	4.01936	Or45b,Alp6,asRNA:CR45281
2R:9568677-9569873	194.235	136.651	0.507311	57.5844	0.896387	57.5866	0.351641	2.26709	Not1
2R:9570139-9571130	142.566	164.732	-0.208487	22.1656	0.589059	-22.1666	-0.144512	0.889304	Not1
2R:9571208-9572012	133.101	237.845	-0.837503	104.744	0.970916	-104.748	-0.580513	3.53757	Not1
2R:9572432-9574403	266.542	264.332	0.0120088	2.20946	0.0527226	2.20949	0.00832389	0.0541634	Not1
2R:9575892-9578811	98.4158	175.91	-0.837874	77.494	0.956896	-77.4985	-0.58077	3.14413	Nt5c,Not1,lncRNA:CR46257
2R:9580020-9581377	395.744	265.69	0.574822	130.054	0.943842	130.055	0.398436	2.87959	Nt5c,Smyd4-1,lncRNA:CR46257
2R:9582039-9582582	262.55	173.681	0.596151	88.869	0.940305	88.871	0.41322	2.81851	Nt5c,Smyd4-1
2R:9582632-9585873	118.245	109.49	0.110978	8.75479	0.316005	8.7555	0.0769237	0.379805	Nt5c,Smyd4-1,Urod,CG12929
2R:9587663-9590541	284.588	236.466	0.267239	48.1215	0.738168	48.1222	0.185236	1.34005	Map60,CG12929,CG1827,clos,RpL31
2R:9590929-9591922	153.967	231.865	-0.590664	77.8982	0.93229	-77.9004	-0.409417	2.69252	Map60,CG1827,clos
2R:9594366-9595540	63.337	133.146	-1.07188	69.8085	0.958321	-69.8167	-0.742973	3.17775	CG1902,CG30338,clos
2R:9595882-9597358	60.3056	89.2615	-0.565746	28.9559	0.789517	-28.9614	-0.392145	1.55835	CG1902,CG30338,clos
2R:9598129-9602320	115.053	105.969	0.118659	9.0842	0.333817	9.08497	0.0822481	0.406191	CG1902,CG30338,CG30339,CG30340,clos
2R:9602774-9603896	55.7305	127.532	-1.19432	71.8017	0.962087	-71.8116	-0.827841	3.27245	CG1902,CG30339
2R:9603990-9604869	130.85	170.319	-0.380327	39.4691	0.810534	-39.471	-0.263623	1.66355	CG1902,lncRNA:CR44285
2R:9607261-9610473	389.814	300.967	0.373178	88.8463	0.853079	88.847	0.258667	1.91786	CG12926,Mmp2,GstT1,GstT2,asRNA:CR44069
2R:9611576-9613626	286.074	164.36	0.799527	121.714	0.971959	121.716	0.55419	3.5741	Mmp2,asRNA:CR44069
2R:9616287-9618807	179.735	113.737	0.660172	65.9983	0.933232	66.0016	0.457597	2.70652	Mmp2,asRNA:CR44069
2R:9626218-9630610	127.54	95.5097	0.417226	32.0299	0.792265	32.0326	0.289199	1.57149	Mmp2
2R:9633288-9634912	455.83	278.109	0.712846	177.721	0.969644	177.722	0.494107	3.49475	Mmp2
2R:9643919-9645282	438.589	621.78	-0.503534	183.191	0.927125	-183.192	-0.349023	2.61901	Mmp2
2R:9652010-9653328	492.902	326.338	0.594931	166.563	0.950738	166.564	0.412375	3.0106	Mmp2
2R:9657376-9658290	473.057	468.582	0.0137132	4.47523	0.0558015	4.47525	0.00950526	0.0574189	Mmp2
2R:9663215-9664370	203.381	163.508	0.314826	39.8733	0.765089	39.8746	0.218221	1.44855	Mmp2
2R:9678855-9679614	85.3188	217.518	-1.3502	132.199	0.989898	-132.206	-0.935886	4.59504	Mmp2
2R:9681089-9685849	113.614	98.8963	0.200148	14.7174	0.503155	14.7187	0.138732	0.699478	Mmp2
2R:9690189-9693279	219.96	234.93	-0.0949857	14.9694	0.325522	-14.9697	-0.0658391	0.393816	Uba1
2R:9696019-9698737	107.325	56.3408	0.929738	50.9845	0.921221	50.993	0.644446	2.54111
2R:9750091-9751770	171.593	96.1086	0.836255	75.4845	0.955445	75.4892	0.579648	3.11104	CheA46a
2R:9761716-9762246	411.178	493.415	-0.263038	82.2369	0.737684	-82.2373	-0.182324	1.33821	trpl
2R:9778446-9779740	84.9495	124.561	-0.552181	39.612	0.857048	-39.6158	-0.382743	1.94525	CG1688
2R:9786666-9790439	160.651	74.4868	1.10888	86.1646	0.972545	86.1718	0.768615	3.59519	CG1688,lncRNA:CR44208
2R:9794556-9799292	87.3006	32.7558	1.41424	54.5448	0.935725	54.5631	0.980278	2.74459	CG1688,CG1698
2R:9819152-9820100	281.523	189.209	0.573275	92.3145	0.935852	92.3162	0.397364	2.74657	CG1648,lectin-46Ca,CG34033
2R:9839174-9840225	224.648	150.213	0.58066	74.4354	0.927863	74.4376	0.402483	2.62918	CG1663,Lsm11,Marc,Vamp7
2R:9841896-9842797	192.686	489.615	-1.34539	296.928	0.99687	-296.932	-0.932556	5.7668	Marc,Sting,Vamp7
2R:9843752-9844823	84.9732	129.735	-0.610483	44.7614	0.88486	-44.7656	-0.423155	2.16161	Orc6,Sting
2R:9858257-9860332	120.418	85.0674	0.501378	35.351	0.829135	35.3546	0.347529	1.76688	PCB,asRNA:CR44293
2R:9877189-9879421	133.977	74.0615	0.855191	59.9156	0.938575	59.9217	0.592773	2.78994	CG12744,Sec24AB
2R:9883915-9885584	194.245	176.459	0.138549	17.7866	0.454809	17.7871	0.0960347	0.606619	CG1513
2R:9885861-9888782	326.322	245.498	0.410582	80.8234	0.876107	80.8244	0.284594	2.08834	CG12923,CG1513
2R:9929505-9930792	405.13	416.969	-0.0415566	11.8394	0.165445	-11.8395	-0.0288049	0.180857	Mef2
2R:9938772-9941433	309.533	205.934	0.587913	103.599	0.943333	103.601	0.40751	2.87057	Mef2
2R:9957957-9959390	102.648	171.074	-0.736918	68.4263	0.94341	-68.4303	-0.510793	2.87192	Mef2,Pdrg1,Pal1
2R:9959506-9961181	336.786	308.012	0.128844	28.7736	0.45598	28.7739	0.0893076	0.608769	Mef2,Pdrg1,Pal1
2R:9969100-9971852	156.381	150.865	0.051804	5.51568	0.174682	5.51592	0.0359078	0.191986	eIF3j,CG12133,CG12134
2R:9990302-9991621	77.5239	148.987	-0.942476	71.4633	0.956056	-71.4695	-0.653274	3.12484	TER94
2R:9995479-9997357	135.344	95.5022	0.503025	39.8418	0.849567	39.8449	0.34867	1.89424	Pka-R2
2R:10004056-10005203	451.315	415.389	0.119669	35.9252	0.433282	35.9254	0.0829483	0.567894	Pka-R2
2R:10023795-10025861	226.721	133.229	0.767013	93.4923	0.962163	93.4954	0.531653	3.27446	Pka-R2,CG12128,lncRNA:CR44294
2R:10031196-10033395	115.299	205.515	-0.833861	90.2157	0.964402	-90.2195	-0.577988	3.33547	CG12128,CG1407,CG12129
2R:10051536-10052587	142.732	222.55	-0.640826	79.8186	0.941628	-79.8211	-0.444186	2.84093	magu,sel,COX7CL,asRNA:CR44297,lncRNA:CR44298
2R:10055474-10056727	228.054	304.024	-0.414808	75.9697	0.873639	-75.9708	-0.287523	2.06861	Def,magu
2R:10064340-10066335	164.536	123.84	0.409926	40.6961	0.827888	40.6982	0.284139	1.75961	Cdc2rk,PIG-N,mRpL42,magu
2R:10066428-10069060	103.108	92.4068	0.158092	10.7017	0.399924	10.7028	0.109581	0.510698	Cdc2rk,PIG-N,mRpL42,CG12920
2R:10093255-10096568	75.3809	48.7001	0.630274	26.6808	0.767659	26.6882	0.436873	1.45955	Jra,CG2269
2R:10115924-10120930	166.236	99.9797	0.733526	66.2563	0.940178	66.2604	0.508442	2.81638	Pfk,Ccs,dmpd
2R:10135352-10138688	93.8247	66.5214	0.496149	27.3033	0.765318	27.3078	0.343904	1.44952	Or46a,CG12917,gem,asRNA:CR43467,CG46319
2R:10142533-10145367	132.887	184.056	-0.469946	51.1692	0.875191	-51.1713	-0.325742	2.08097	Or46a,CG18011,KCNQ,asRNA:CR43467
2R:10146403-10147898	125.737	100.038	0.329859	25.699	0.710178	25.7011	0.228641	1.23849	CG18011,KCNQ
2R:10157670-10158855	262.757	523.114	-0.993395	260.357	0.98944	-260.359	-0.688569	4.5507	KCNQ,mlt
2R:10173876-10175921	235.626	144.206	0.708367	91.42	0.95626	91.4227	0.491002	3.12948	KCNQ
2R:10200023-10205234	88.787	74.369	0.255647	14.418	0.529389	14.4203	0.177201	0.753724	Hr3,CG12912,CG34221,CG46321
2R:10207490-10208997	278.837	199.756	0.481185	79.0812	0.904885	79.0827	0.333532	2.35267	Hr3,CG12912,CG46321,lncRNA:CR46322
2R:10231664-10234170	225.165	268.486	-0.253867	43.3215	0.707023	-43.3222	-0.175967	1.22766	Hr3,CG12912
2R:10307680-10309632	68.5849	70.6639	-0.0430828	2.07902	0.0901527	-2.07946	-0.0298627	0.0944785	RNaseZ,CAP,CG12909
2R:10321482-10324291	122.728	86.0097	0.512892	36.7182	0.837583	36.7218	0.35551	1.81759	Ndg,CG34222,SLO2
2R:10362713-10364616	60.7115	84.8377	-0.482737	24.1262	0.72888	-24.1311	-0.334607	1.3052	Gr47a,SLO2
2R:10431304-10433678	105.628	121.377	-0.200495	15.7484	0.518779	-15.7497	-0.138972	0.731428	RanBPM
2R:10434092-10435692	85.7961	78.2168	0.133433	7.57928	0.305802	7.58045	0.0924888	0.364997	CG12895,RanBPM
2R:10459838-10462098	109.639	107.672	0.0261203	1.96718	0.0820102	1.96735	0.0181052	0.085569	Galphao,Cyp49a1
2R:10466660-10471000	65.6903	59.2942	0.147789	6.39609	0.275802	6.3978	0.10244	0.32269	Galphao,Caf1-105,CG11777,whd
2R:10488991-10490787	169.247	121.199	0.481752	48.048	0.871654	48.0504	0.333925	2.05303	lola
2R:10497085-10497827	158.637	158.51	0.00114978	0.126377	0.00587786	0.126382	0.000796963	0.00589521	lola
2R:10500779-10501990	86.489	155.352	-0.844952	68.8629	0.949466	-68.8681	-0.585676	2.9851	lola
2R:10504632-10507091	109.095	138.941	-0.348881	29.8455	0.751196	-29.8475	-0.241826	1.39109	lola
2R:10519088-10521228	237.258	262.792	-0.147465	25.5339	0.498193	-25.5344	-0.102215	0.68954	lola
2R:10524244-10527835	205.56	155.669	0.401075	49.8908	0.846819	49.8924	0.278004	1.87614	lola
2R:10529211-10531136	120.185	131.32	-0.127828	11.1349	0.378855	-11.1356	-0.088604	0.476191	lola
2R:10533392-10535688	317.294	309.518	0.0357984	7.77633	0.160611	7.77642	0.0248136	0.175081	snoRNA:lola-a,lola
2R:10535783-10537066	328.045	638.319	-0.960385	310.274	0.988931	-310.276	-0.665688	4.50363	snoRNA:lola-a,snoRNA:lola-b,snoRNA:lola-c,snoRNA:lola-d,lola
2R:10537137-10538217	196.147	485.506	-1.30755	289.359	0.996438	-289.362	-0.906326	5.63734	snoRNA:lola-a,snoRNA:lola-b,snoRNA:lola-c,snoRNA:lola-d,lola
2R:10545357-10548018	164.413	218.395	-0.409618	53.9824	0.85659	-53.984	-0.283926	1.94205	lncRNA:acal
2R:10548299-10548673	342.659	348.751	-0.0254257	6.09246	0.125369	-6.09252	-0.0176237	0.133953
2R:10551261-10552295	323.62	359.298	-0.15088	35.6779	0.511145	-35.6783	-0.104582	0.715689
2R:10554647-10557131	83.3797	89.0175	-0.0943927	5.63779	0.228346	-5.63858	-0.065428	0.259219	psq
2R:10569044-10570565	321.061	296.526	0.114688	24.5348	0.397277	24.535	0.0794955	0.506298	psq
2R:10611313-10611810	50.5945	111.145	-1.13539	60.5507	0.94659	-60.5614	-0.786994	2.92976	psq
2R:10611972-10613295	459.317	343.132	0.420726	116.185	0.889746	116.186	0.291625	2.20496	psq
2R:10639132-10640797	65.2797	80.8286	-0.308232	15.5489	0.566667	-15.552	-0.21365	0.836248	CG11883
2R:10645056-10646801	368.204	370.269	-0.00806665	2.06453	0.0521628	-2.06455	-0.00559138	0.0535726	Git,Elp2
2R:10648032-10651954	72.9489	69.5801	0.0682128	3.36886	0.147506	3.36955	0.0472815	0.15959	Elp2,CG12934
2R:10666546-10670158	74.7253	102.095	-0.45025	27.3701	0.759822	-27.3738	-0.312089	1.42637
2R:10700263-10701961	189.666	168.837	0.167833	20.8294	0.523232	20.8301	0.116333	0.740724	stan
2R:10724174-10725888	357.708	177.256	1.01295	180.452	0.98799	180.455	0.702121	4.422	Rab3,CAH13
2R:10739016-10742024	121.075	80.7573	0.584239	40.318	0.863944	40.3222	0.404964	1.99469	Mat1,CG7220,CG33144
2R:10800919-10804162	110.524	54.4121	1.02236	56.1119	0.936132	56.1212	0.708646	2.75094	wde
2R:10812035-10815754	80.3096	65.4061	0.296147	14.9035	0.550585	14.9064	0.205274	0.799809	mms4,CG12341,CG7222,dgo
2R:10818536-10820303	87.3177	94.8585	-0.119502	7.54077	0.29916	-7.54172	-0.0828328	0.355476	Prosbeta5,Lsm10,dgo
2R:10820422-10820746	25.8856	115.442	-2.15695	89.5564	0.97972	-89.5823	-1.49508	3.89813	Prosbeta5,Lsm10,RpS15Ab,dgo
2R:10873957-10875135	79.068	242.454	-1.61654	163.386	0.994758	-163.394	-1.1205	5.2511	CG30015,CG30016,nclb
2R:10880365-10880929	59.2312	168.728	-1.51027	109.497	0.986743	-109.507	-1.04684	4.32323	Taf5,Pex6
2R:10885322-10888166	132.842	81.9463	0.696964	50.896	0.911349	50.9008	0.483099	2.42304	CG18004,CG30020,Hao,mir-1008
2R:10888471-10891381	53.9007	84.047	-0.640891	30.1463	0.805598	-30.1531	-0.444232	1.63783	CG30020
2R:10892293-10893868	68.9088	112.02	-0.701001	43.1116	0.886692	-43.1173	-0.485897	2.17765	cag,CG12942,CG30020
2R:10896189-10897386	103.653	146.126	-0.495455	42.4732	0.859898	-42.4761	-0.343423	1.96539	CG12942,ND-B14,Polr2E
2R:10997608-10999215	321.184	100.604	1.67471	220.58	0.997099	220.587	1.16082	5.84278	luna
2R:11196831-11198837	96.2643	99.7084	-0.0507139	3.44408	0.138626	-3.44445	-0.0351522	0.149226	shn
2R:11200541-11204258	108.573	60.5141	0.843321	48.0588	0.910534	48.0662	0.584546	2.4139	shn
2R:11211393-11213527	258.281	174.705	0.564015	83.5752	0.929695	83.5771	0.390945	2.65491	shn
2R:11214566-11216601	95.1038	67.2384	0.500216	27.8653	0.771501	27.8698	0.346724	1.47622	shn,CG9084
2R:11220337-11221099	84.1287	379.638	-2.17395	295.509	0.999389	-295.517	-1.50687	7.40093	CG9084,Syx6
2R:11224765-11226229	160.207	75.7208	1.08118	84.4863	0.970738	84.4932	0.749414	3.53146	CG7737,metro
2R:11227951-11229861	185.473	184.492	0.0076548	0.981495	0.0385496	0.981525	0.0053059	0.0393123	metro
2R:11270367-11271636	205.922	111.041	0.891001	94.8805	0.970025	94.8847	0.617595	3.50741	Cpr47Ef
2R:11281033-11282158	87.498	154.127	-0.816795	66.6287	0.945623	-66.6337	-0.566159	2.91182	CG9062,Vhl
2R:11283004-11284963	135.577	363.26	-1.42189	227.682	0.996031	-227.687	-0.985577	5.52912	CG9062,CG13220,Fbl6
2R:11285922-11288149	212.081	192.479	0.139914	19.6019	0.462366	19.6024	0.0969807	0.620578	CG13220,Fbl6
2R:11291673-11292950	140.696	107.415	0.389385	33.281	0.789059	33.2833	0.269901	1.55617	dare,CG18335,CG18336,CG30033
2R:11293621-11294881	309.854	166.98	0.891914	142.874	0.980204	142.877	0.618228	3.92225	dare,CG18336,CG30033,CG42336
2R:11295279-11297836	89.1421	73.917	0.270201	15.2251	0.548982	15.2275	0.187289	0.796248	CG18336,CG42336
2R:11308222-11309765	161.382	120.076	0.426533	41.3061	0.837252	41.3083	0.29565	1.81555	nompA,Fpps,CG7745
2R:11309923-11311569	152.255	79.8636	0.930884	72.3919	0.956921	72.3978	0.64524	3.14472	nompA,CG7745,CG43114
2R:11320200-11321612	140.009	133.666	0.066894	6.34366	0.221501	6.34402	0.0463674	0.250388	Or47b
2R:11344956-11345848	46.5295	85.3484	-0.875219	38.8189	0.872672	-38.8288	-0.606656	2.06099	alphaTry,betaTry,epsilonTry
2R:11361483-11363856	121.513	118.24	0.039394	3.27312	0.123817	3.27336	0.0273058	0.13218	san,Gr47b
2R:11369004-11371017	197.896	105.746	0.904142	92.1504	0.969262	92.1548	0.626703	3.48226	Tapdelta,CG13204
2R:11453225-11454351	93.8916	69.5716	0.432497	24.32	0.724656	24.3238	0.299784	1.28974	E(Pc)
2R:11456760-11457710	111.741	149.77	-0.422595	38.0294	0.822112	-38.0317	-0.29292	1.7266	E(Pc)
2R:11459110-11460747	128.724	130.113	-0.0154833	1.38894	0.0580916	-1.38902	-0.0107322	0.0598473	E(Pc)
2R:11584762-11586288	57.9071	100.337	-0.793046	42.4302	0.887455	-42.4376	-0.549698	2.18441	tou
2R:11586957-11590548	76.6752	87.082	-0.183615	10.4068	0.405242	-10.4084	-0.127272	0.5196	tou,snoRNA:Psi28S-1936,snoRNA:Psi28S-1180
2R:11622161-11622962	320.882	314.239	0.0301778	6.64238	0.126514	6.64245	0.0209177	0.135263	atos
2R:11623066-11623797	192.581	267.824	-0.47582	75.243	0.903053	-75.2445	-0.329813	2.3336	atos
2R:11623815-11625222	141.425	127.09	0.154185	14.3348	0.443511	14.3356	0.106873	0.586109	atos
2R:11641749-11642954	125.745	157.035	-0.320583	31.2898	0.742265	-31.2915	-0.222211	1.35582	atos,CG9003
2R:11643073-11644377	153.455	131.107	0.227068	22.3477	0.614071	22.3489	0.157391	0.952103	CG9003
2R:11690492-11691526	81.1552	148.274	-0.869513	67.1191	0.949084	-67.1248	-0.6027	2.97758	wal,CG13197
2R:11703489-11704998	231.016	273.468	-0.24338	42.4521	0.691476	-42.4528	-0.168698	1.17596	lncRNA:CR45377
2R:11705111-11706613	149.496	71.6443	1.06118	77.8512	0.965064	77.8584	0.735552	3.35423	lncRNA:CR45377
2R:11788021-11789202	323.414	219.53	0.55896	103.883	0.937201	103.885	0.387442	2.76782	Ir48c,ths
2R:11799981-11801425	72.5533	151.04	-1.05782	78.487	0.965496	-78.4941	-0.733225	3.36669	ths
2R:11810388-11811900	130.836	138.5	-0.0821275	7.6641	0.256819	-7.66454	-0.0569264	0.296816	ths
2R:11825750-11826867	83.0907	67.4724	0.300391	15.6184	0.56542	15.6213	0.208215	0.833375	CG13192,Sobp
2R:11830371-11832912	146.52	66.8855	1.13133	79.6348	0.967939	79.6428	0.784182	3.44011	Sobp
2R:11836820-11840426	111.267	60.1775	0.886734	51.0899	0.920356	51.0976	0.614637	2.53019	Sobp
2R:11842081-11843622	104.969	104.062	0.0125195	0.906958	0.036743	0.907045	0.00867783	0.037435	S2P,CG34229,CG43190,asRNA:CR44304
2R:11843679-11844615	313.788	314.097	-0.00141969	0.308937	0.0121374	-0.308941	-0.000984056	0.0122117	S2P,Sln,CG43190,asRNA:CR44304
2R:11892914-11895623	201.363	109.499	0.87888	91.864	0.968066	91.8682	0.609193	3.44409	snoRNA:Me28S-A1322,MCPH1,eEF1alpha1
2R:11896311-11898141	230.662	186.346	0.307794	44.3157	0.774606	44.3168	0.213347	1.4899	MCPH1,eEF1alpha1
2R:11967869-11968764	223.363	344.694	-0.625924	121.331	0.953868	-121.332	-0.433858	3.07624	exp,PI31
2R:11970758-11971985	254.865	186.773	0.448452	68.0927	0.888142	68.0941	0.310843	2.19053	ADD1,PI31
2R:11988326-11991176	119.95	195.344	-0.703577	75.3934	0.945598	-75.3967	-0.487682	2.91135	rho-7,CG8298,CG34231
2R:12029874-12032554	118.537	135.247	-0.190253	16.7094	0.520738	-16.7105	-0.131873	0.735508	pds5
2R:12039854-12041834	99.9122	77.9349	0.358392	21.9773	0.68313	21.9803	0.248418	1.14926	Polr3B
2R:12053187-12055145	194.907	121.981	0.676123	72.9253	0.941781	72.9284	0.468653	2.84355	Drep3,CG44314
2R:12076991-12079010	189.719	150.496	0.334137	39.2228	0.779466	39.2242	0.231606	1.5117	CG8888
2R:12096851-12098938	166.796	275.181	-0.722296	108.385	0.963282	-108.387	-0.500657	3.3045	jeb
2R:12116464-12117817	47.7537	54.7037	-0.196026	6.95	0.303282	-6.95276	-0.135875	0.361375	jeb
2R:12134287-12136001	262.514	277.331	-0.0792134	14.8168	0.297201	-14.817	-0.0549065	0.352684
2R:12140867-12141482	97.7947	143.109	-0.54929	45.3147	0.878448	-45.318	-0.380739	2.10741	SkpB,Smyd4-4
2R:12141853-12144706	93.0305	87.465	0.0889974	5.56547	0.226183	5.56618	0.0616883	0.25642	Smyd4-4,OSCP1
2R:12147837-12148726	78.4167	121.617	-0.63311	43.2002	0.881247	-43.2048	-0.438839	2.13071	bsd,Hen1
2R:12154918-12156634	52.491	97.8129	-0.897956	45.322	0.90257	-45.3309	-0.622416	2.32862	CG8407,Prp8
2R:12157110-12158327	93.8238	172.79	-0.880996	78.9664	0.959822	-78.9713	-0.61066	3.21443	Prp8,mir-988
2R:12158377-12159060	22.0547	63.0018	-1.51431	40.9472	0.887608	-40.9751	-1.04964	2.18576	Prp8,mir-988
2R:12159110-12161021	114.553	98.3341	0.220253	16.219	0.541145	16.2205	0.152668	0.779021	Prp8,mir-988,scaRNA:PsiU2-55
2R:12163712-12166734	167.557	88.2505	0.92498	79.3069	0.961705	79.3123	0.641147	3.26243	Oda,Prp8,CG13177,CG34232
2R:12167732-12172575	70.6795	56.4077	0.325401	14.2718	0.541196	14.2756	0.225551	0.779132	Oda,SmD3,asRNA:CR46194,mir-281-1,mir-281-2
2R:12172592-12175094	96.6942	194.91	-1.0113	98.2155	0.976336	-98.2207	-0.700983	3.7438	CCT5,Oda,asRNA:CR46194
2R:12189278-12190343	30.9442	85.2055	-1.46128	54.2613	0.935242	-54.281	-1.01288	2.73709	Cyp6g1,Cyp6g2,Cyp6t3
2R:12195075-12195945	59.8173	138.286	-1.20902	78.4684	0.967913	-78.4777	-0.838027	3.43932	CG8858
2R:12234827-12237897	90.1861	55.6992	0.695248	34.4869	0.841985	34.4939	0.481909	1.84506	lncRNA:CR44313
2R:12250709-12252053	300.079	495.116	-0.722425	195.037	0.971425	-195.039	-0.500747	3.55522
2R:12261153-12263746	149.984	88.2752	0.764726	61.7085	0.936336	61.7132	0.530067	2.75413	Cam,lncRNA:CR43900
2R:12264896-12267029	264.656	208.178	0.3463	56.4778	0.823053	56.4788	0.240037	1.73191	Cam
2R:12294971-12296218	145.353	101.278	0.521232	44.0743	0.869262	44.0774	0.361291	2.03456	CG42700,asRNA:CR45271
2R:12296624-12297766	265.778	127.403	1.06082	138.375	0.986158	138.379	0.735308	4.28003	CG8850,CG42700,asRNA:CR45271
2R:12301773-12302732	347.24	209.468	0.729202	137.772	0.968982	137.774	0.505445	3.47319	CG8850,salto,CG42700
2R:12306934-12307913	126.876	144.171	-0.184366	17.2953	0.5143	-17.2963	-0.127793	0.722165	CG17739,salto
2R:12315899-12317365	77.9375	75.9035	0.0381508	2.03398	0.0883206	2.03433	0.0264441	0.0924669	CG30046
2R:12329267-12332334	117.669	73.1916	0.68499	44.4779	0.890534	44.4831	0.474799	2.21214	garz
2R:12334086-12337152	244.646	324.543	-0.407713	79.8967	0.875522	-79.8977	-0.282605	2.08362	tRNA:His-GTG-2-1Psi,tRNA:His-GTG-1-4,CG8490,Den1,tRNA:His-GTG-1-1,tRNA:His-GTG-1-2,tRNA:His-GTG-1-3,CG34021,garz
2R:12338067-12339968	124.007	142.019	-0.195668	18.0125	0.545573	-18.0136	-0.135627	0.788717	Den1,CG8839,CG34021
2R:12340149-12341549	171.853	116.097	0.565839	55.7554	0.906489	55.7583	0.39221	2.36967	Den1,CG8839
2R:12345161-12346752	120.862	122.295	-0.0170076	1.43324	0.0594402	-1.43334	-0.0117888	0.0612801	CG8839,ana3
2R:12348688-12351032	72.5648	63.5538	0.191291	9.01098	0.370662	9.01301	0.132593	0.463086	CG30047,ana3
2R:12424293-12425647	79.6073	89.6349	-0.17116	10.0276	0.391094	-10.029	-0.118639	0.496092	CG8520,Dera
2R:12426220-12430637	114.997	55.3237	1.05563	59.6737	0.943715	59.6831	0.731709	2.87733	CG8520,Dera,CG13154,Nup54,DUBAI,CG43204
2R:12431720-12433360	46.6773	63.6429	-0.447278	16.9656	0.610585	-16.9715	-0.31003	0.94311	Nup54,DUBAI,CG43204
2R:12439531-12441418	149.462	159.047	-0.0896717	9.58473	0.296794	-9.58515	-0.0621557	0.352105	Dyb,CG30334
2R:12442114-12445303	191.633	114.742	0.739954	76.891	0.95028	76.8946	0.512897	3.00135	Dyb,CG30334
2R:12447727-12451016	130.374	83.532	0.642253	46.8418	0.895191	46.8462	0.445176	2.25561	Dyb
2R:12457302-12463231	115.766	49.0554	1.23873	66.7105	0.957226	66.722	0.85862	3.15184	Lac
2R:12487924-12490187	71.9946	50.7724	0.503845	21.2222	0.690992	21.2282	0.349239	1.17439	Dh44-R2,fdl,CG34234
2R:12516226-12516788	98.9637	321.517	-1.69992	222.553	0.997226	-222.56	-1.1783	5.88763	CG13151,CG8818
2R:12516828-12519947	128.144	152.175	-0.247962	24.0307	0.6457	-24.032	-0.171874	1.03761	CG13151,CG8818,CG8569
2R:12572193-12573931	211.526	137.258	0.623946	74.268	0.934758	74.2706	0.432486	2.72966	stil,ClC-b
2R:12581273-12583351	185.67	114.703	0.694839	70.967	0.940941	70.9704	0.481626	2.82923	Sin3A
2R:12585191-12586348	275.527	202.566	0.443796	72.9601	0.887099	72.9615	0.307616	2.18125	Sin3A
2R:12586611-12590823	339.557	375.739	-0.146076	36.1816	0.511272	-36.1819	-0.101252	0.71595	Sin3A,lncRNA:CR30055
2R:12610114-12611142	141.278	178.118	-0.3343	36.8404	0.772595	-36.8419	-0.231719	1.48102	Amph
2R:12616902-12619158	63.6536	82.1944	-0.368799	18.5408	0.63374	-18.5445	-0.255632	1.00441	Galphaq,CG45086
2R:12629659-12630812	68.3142	117.438	-0.781644	49.124	0.911018	-49.1302	-0.541795	2.41932	muskelin
2R:12633889-12635438	64.2719	89.418	-0.476377	25.1461	0.740458	-25.1506	-0.3302	1.34884	spt4,CG33792,Mvk,CG33672
2R:12638749-12639763	43.8341	86.7931	-0.985528	42.9591	0.894504	-42.9704	-0.683116	2.24908	Iswi,CG8785
2R:12653209-12654625	134.081	129.229	0.0531763	4.85213	0.166183	4.85242	0.036859	0.181742	CG8778,ZnT49B
2R:12675849-12677447	85.0477	122.675	-0.528493	37.627	0.84514	-37.6307	-0.366324	1.86523	GLS
2R:12679013-12683263	137.421	172.548	-0.32839	35.1264	0.76659	-35.128	-0.227623	1.45496	Nup188,GLS
2R:12685120-12689116	35.5505	76.8856	-1.11284	41.3351	0.888142	-41.35	-0.771364	2.19053	Nup188,CG13148,Obp49a,CG30053
2R:12691888-12692855	65.9568	128.29	-0.95981	62.3327	0.946361	-62.3401	-0.66529	2.92548	CG8768,Obp49a
2R:12729567-12731938	110.826	137.615	-0.312346	26.7894	0.707913	-26.7912	-0.216502	1.23071	CG42663
2R:12733306-12737431	67.5925	40.1865	0.750152	27.406	0.779008	27.4163	0.519966	1.50963	CG42663
2R:12753729-12755404	199.503	136.207	0.550611	63.296	0.913206	63.2984	0.381654	2.44422	Taz,Mos
2R:12755469-12756920	290.211	190.255	0.609166	99.9557	0.945954	99.9575	0.422242	2.91792	ox,Dgkepsilon,Taz,mRpL18
2R:12757789-12758751	75.4644	95.2281	-0.335591	19.7637	0.648321	-19.7665	-0.232614	1.04504	ox,Dgkepsilon,mRpL18,Nacalpha
2R:12804805-12807143	142.347	127.369	0.160392	14.9775	0.465115	14.9784	0.111175	0.625703	CG17580
2R:12878469-12879711	446.942	310.407	0.525926	136.535	0.934198	136.536	0.364544	2.72111	AspRS,Nmda1
2R:12915735-12918291	231.02	197.496	0.226196	33.5242	0.662061	33.525	0.156787	1.08489	NAT1
2R:12921651-12923454	314.732	232.834	0.434826	81.8987	0.886743	81.8998	0.301398	2.1781	NAT1,CG13319
2R:12924081-12924739	106.986	294.875	-1.46268	187.889	0.995267	-187.895	-1.01385	5.35323	NAT1,CG13319,sug
2R:12930173-12932337	59.4099	99.2982	-0.741066	39.8884	0.874046	-39.8952	-0.513667	2.07184	sug,CG17019
2R:12937528-12938795	34.5319	76.4516	-1.14662	41.9198	0.891094	-41.9355	-0.794776	2.21727	SCCRO3,Sans,CG30487
2R:13003688-13006321	92.4835	45.8423	1.01252	46.6412	0.909847	46.6522	0.701823	2.40625	Su(z)2
2R:13011233-13012485	50.3325	61.8567	-0.297438	11.5242	0.464198	-11.528	-0.206169	0.623991
2R:13059741-13062061	174.921	90.1017	0.957076	84.8191	0.967837	84.8245	0.663394	3.43694	Drl-2
2R:13146196-13148147	78.2145	118.922	-0.604514	40.708	0.867735	-40.7125	-0.419017	2.02295	Ack-like
2R:13148354-13149300	51.8073	103.955	-1.00473	52.1475	0.925878	-52.1572	-0.696425	2.60204	Ack-like
2R:13150658-13151474	88.2379	138.678	-0.652267	50.44	0.905903	-50.4442	-0.452117	2.36343	Ack-like
2R:13153105-13154686	88.1742	115.488	-0.389321	27.3143	0.74631	-27.3171	-0.269856	1.37164	TppII,Ack-like
2R:13156053-13158493	133.053	191.874	-0.528155	58.8207	0.903232	-58.8231	-0.366089	2.33543	TppII,ND-MWFE
2R:13158838-13161442	84.1166	53.8751	0.642771	30.2415	0.806412	30.2483	0.445535	1.64202	TppII,Nrk,ND-MWFE
2R:13171338-13174299	84.4785	59.3912	0.508336	25.0873	0.742952	25.0925	0.352351	1.35849	AGBE,Spt-I,asRNA:CR45142
2R:13177564-13180064	86.8839	81.876	0.0856486	5.00792	0.209924	5.00866	0.0593671	0.235626	seq,CG17724,Kdm4B
2R:13186894-13187982	163.206	142.492	0.195811	20.7138	0.567812	20.7147	0.135726	0.838894	seq,CG17724,Kdm4B
2R:13190405-13190692	51.1361	163.733	-1.67893	112.597	0.988193	-112.609	-1.16375	4.4391	seq,CG17724,Kdm4B
2R:13193332-13195108	213.903	407.693	-0.930526	193.79	0.985369	-193.792	-0.644992	4.22461	Kdm4B
2R:13195222-13197277	148.673	120.204	0.306654	28.4687	0.719237	28.4703	0.212556	1.27024	Kdm4B
2R:13201440-13202880	37.4027	87.9326	-1.23326	50.5299	0.924453	-50.545	-0.854828	2.583	Orc3,ValRS,CG34315
2R:13203774-13207345	74.5948	80.1551	-0.103719	5.56028	0.231578	-5.56124	-0.0718924	0.263416	Orc3,FLASH,CG34315
2R:13215428-13219405	81.7906	77.4858	0.0780023	4.30476	0.182952	4.30546	0.0540671	0.202057	AQP,CG4627,CG4630,CG4646,CG17059
2R:13232213-13233548	108.146	95.8884	0.173551	12.2575	0.437074	12.2587	0.120296	0.574607	fsd,Qsox1
2R:13233920-13234781	164.59	129.904	0.341438	34.6867	0.771196	34.6884	0.236667	1.47489	Qsox1
2R:13236779-13240105	79.6377	101.49	-0.349814	21.8523	0.678346	-21.8551	-0.242472	1.13428	CG4676,CG4679,GstE14
2R:13252673-13253771	68.1591	53.3231	0.354144	14.8359	0.557048	14.8402	0.245474	0.814295	CG4712,CG4714,lncRNA:CR44343
2R:13259905-13262920	150.605	151.166	-0.005361	0.560682	0.0240204	-0.560708	-0.00371596	0.0243135	CG42319
2R:13285189-13287031	399.225	298.392	0.419994	100.833	0.887405	100.834	0.291118	2.18395	Dh31-R
2R:13290182-13296466	142.609	79.4804	0.84339	63.1282	0.943155	63.1338	0.584593	2.86743	CG4734,Dh31-R
2R:13322888-13326527	102.529	114.828	-0.163444	12.2991	0.429415	-12.3002	-0.113291	0.561093
2R:13336248-13340133	117.128	202.252	-0.788067	85.1237	0.959109	-85.1273	-0.546246	3.19686	lncRNA:CR44206
2R:13415251-13416875	183.561	238.567	-0.378135	55.0059	0.841959	-55.0072	-0.262103	1.8449	ATP8A,CG30059
2R:13431042-13432531	79.0523	91.7736	-0.215271	12.7213	0.477557	-12.7231	-0.149214	0.64924	tRNA:Ile-AAT-1-3,tRNA:Ile-AAT-1-4,tRNA:Ile-AAT-1-5,tRNA:Ile-AAT-1-6,tRNA:Ile-AAT-1-7,tRNA:Leu-CAA-2-1,tRNA:Leu-CAA-1-1,CG30065,ATP8A
2R:13437560-13439222	209.729	307.668	-0.55285	97.9392	0.933257	-97.9407	-0.383206	2.70691	cnn,tRNA:Ile-AAT-1-8,ATP8A
2R:13455799-13457781	149.817	89.7558	0.739128	60.0616	0.932901	60.0662	0.512325	2.70158	arr
2R:13458786-13460966	70.2176	74.1639	-0.0788851	3.94633	0.171145	-3.94712	-0.054679	0.18771	arr
2R:13464211-13466235	201.004	126.187	0.671655	74.8163	0.941908	74.8193	0.465556	2.84573	arr
2R:13490870-13492525	263.304	118.088	1.15687	145.216	0.989008	145.221	0.801882	4.51055	bbc
2R:13505247-13507068	68.7808	95.6307	-0.475469	26.8499	0.758753	-26.8542	-0.32957	1.42193	mEFTu1,mars,mip120
2R:13508521-13510142	32.4219	105.125	-1.69706	72.7027	0.965954	-72.7225	-1.17631	3.38005	mEFTu1,mip120
2R:13511048-13512363	35.1761	71.3988	-1.0213	36.2227	0.859211	-36.2371	-0.707914	1.96049	mip120,Vmat
2R:13537580-13539253	52.4062	57.4775	-0.13326	5.0713	0.223384	-5.07305	-0.0923688	0.25281	Nadk1a
2R:13546434-13548058	52.0551	149.407	-1.52114	97.3523	0.982366	-97.3642	-1.05437	4.03795	Nadk1a,Nadk1b
2R:13590911-13593658	260.31	290.834	-0.159969	30.5247	0.530483	-30.5251	-0.110882	0.756052	CG6191,fand,CG45088
2R:13594043-13594595	12.5076	237.247	-4.24551	224.739	0.998142	-224.78	-2.94277	6.28852	CG6191,fand,CG45088
2R:13653362-13658701	93.487	96.0712	-0.0393387	2.58423	0.106412	-2.58453	-0.0272675	0.112511	tei
2R:13665007-13668024	125.052	66.4377	0.912452	58.6142	0.937863	58.6213	0.632464	2.77841	tei,CG13337,CG18368
2R:13668516-13672036	158.78	61.157	1.37644	97.6231	0.981679	97.6328	0.954076	3.99973	tei,CG13337,CG18368,lncRNA:CR45031
2R:13692339-13693270	163.727	206.398	-0.334139	42.6713	0.788575	-42.6726	-0.231607	1.55389	tei,CG6220
2R:13704406-13705829	518.537	1292.96	-1.31816	774.421	0.996896	-774.422	-0.913677	5.77496	tei
2R:13715770-13717930	122.492	44.5312	1.4598	77.9605	0.969491	77.9741	1.01185	3.48974	tei
2R:13803380-13804808	83.6715	106.1	-0.342617	22.4285	0.682723	-22.4311	-0.237484	1.14798	Cpr50Cb,stj
2R:13808701-13810564	107.069	74.0351	0.532261	33.034	0.819109	33.0382	0.368935	1.70986	stj
2R:13814044-13817227	97.1641	111.061	-0.19286	13.8972	0.481832	-13.8985	-0.133681	0.657456	stj
2R:13817508-13819389	180.284	305.267	-0.759801	124.983	0.969567	-124.985	-0.526654	3.49224	fl(2)d,stj
2R:13820381-13821482	157.754	213.88	-0.439131	56.1267	0.873053	-56.1284	-0.304382	2.06399	fl(2)d,stj
2R:13823661-13825244	118.911	142.765	-0.263758	23.8538	0.652265	-23.8552	-0.182823	1.05631	fl(2)d,CG13339
2R:13829275-13831415	177.613	151.196	0.232324	26.4178	0.637837	26.4188	0.161035	1.01566	CG6329
2R:13832800-13836933	97.7656	98.2389	-0.00696698	0.473266	0.0208142	-0.473317	-0.00482914	0.0210339	CG6329,CG6337,CG6347
2R:13837514-13840318	192.427	106.473	0.853826	85.9541	0.963715	85.9583	0.591827	3.31635	CG6347,CG6357
2R:13858114-13860064	147.674	143.394	0.0424387	4.28076	0.139695	4.28097	0.0294163	0.150468	CG16935,tum,Uba3
2R:13865501-13866669	38.7626	78.5187	-1.01837	39.7561	0.87944	-39.7692	-0.705881	2.11561	shot
2R:13893311-13894313	16.909	58.8323	-1.79882	41.9233	0.892875	-41.9619	-1.24685	2.23376	shot
2R:13947273-13949092	150.136	117.774	0.350248	32.3619	0.765751	32.3638	0.242774	1.45137	AGO1
2R:13949191-13950412	155.114	123.049	0.334088	32.0642	0.753282	32.066	0.231572	1.39951	AGO1
2R:13954415-13954997	178.522	588.44	-1.72079	409.918	0.999008	-409.921	-1.19276	6.91542	mRpL53,CG33155,AGO1
2R:13955864-13957967	241.638	170.664	0.50169	70.9741	0.906794	70.9758	0.347745	2.37294	Rpn13,mRpL53,CG33155,AGO1
2R:13968764-13969565	53.1509	104.503	-0.975385	51.3525	0.923562	-51.3618	-0.676085	2.57128	Cp1,St4,PheRS-m
2R:13970946-13972072	40.505	103.269	-1.35024	62.7643	0.952494	-62.7789	-0.935915	3.04689	St4,CG18568,CG6701
2R:13983095-13984529	86.7521	201.373	-1.2149	114.621	0.985293	-114.627	-0.842103	4.21941	RN-tre,Ctf4,CG8067
2R:13987350-13989747	64.7581	97.4551	-0.589676	32.6969	0.822977	-32.7023	-0.408732	1.73148	RN-tre
2R:13991796-13992641	488.215	631.701	-0.371726	143.486	0.85827	-143.487	-0.257661	1.95383	mam
2R:13997124-14001263	173.673	104.818	0.728481	68.8545	0.94285	68.8583	0.504944	2.86207	mam
2R:14009494-14011399	85.6926	115.233	-0.427315	29.5407	0.775878	-29.5438	-0.296192	1.49556	mam
2R:14040259-14041755	254.1	358.879	-0.498102	104.779	0.920992	-104.78	-0.345258	2.53821	mam
2R:14050632-14052090	308.01	229.081	0.427121	78.9292	0.885089	78.9304	0.296058	2.1636	mam
2R:14063185-14065029	274.649	225.879	0.282042	48.7705	0.751883	48.7713	0.195497	1.39385	Prosap
2R:14065274-14066821	128.161	108.849	0.235625	19.3117	0.595522	19.3132	0.163323	0.905157	Prosap
2R:14089245-14090983	117.435	117.332	0.0012661	0.103015	0.00450382	0.103023	0.000877592	0.00451399	Prosap,CG42287,CG42288
2R:14135899-14138599	175.593	178.821	-0.0262808	3.22799	0.107913	-3.2281	-0.0182165	0.114192	Prosap
2R:14148829-14150094	317.247	299.084	0.0850548	18.1628	0.331908	18.163	0.0589555	0.40333	Rcd1
2R:14154090-14155788	35.963	67.6381	-0.911324	31.6752	0.82486	-31.6883	-0.631682	1.74217	Rcd1,pea
2R:14163381-14166008	96.637	98.1259	-0.0220588	1.48893	0.060687	-1.48909	-0.01529	0.0626065	O-fut1,eIF3m,CG8323,CG18327
2R:14167167-14168062	27.0716	79.4042	-1.55243	52.3326	0.93028	-52.3556	-1.07607	2.66327	CG8323,CG18327,CG18324,asRNA:CR44368
2R:14179515-14181625	168.223	124.268	0.436919	43.9548	0.849084	43.957	0.302849	1.89103	cg
2R:14183556-14186027	88.3546	139.938	-0.663414	51.5837	0.909415	-51.588	-0.459843	2.40146	cg,Sdb
2R:14197848-14199900	180.553	98.8317	0.86938	81.7216	0.961603	81.7263	0.602608	3.25978	VGAT,Sdb
2R:14207402-14208990	350.11	386.964	-0.144394	36.8546	0.488448	-36.8549	-0.100086	0.670306	Sox15
2R:14233406-14234558	66.5078	103.13	-0.63287	36.6223	0.850891	-36.6278	-0.438672	1.90307	Opa1,mir-1016
2R:14238224-14239059	92.2537	96.9419	-0.0715144	4.68825	0.187888	-4.6888	-0.04957	0.208117	Snrk,Usp20-33
2R:14240276-14242536	56.4521	55.272	0.0304787	1.18011	0.0533842	1.18051	0.0211262	0.054862	Snrk,Usp20-33
2R:14254001-14255158	221.77	203.095	0.126908	18.6749	0.437557	18.6753	0.0879662	0.575466	Hsc70-5
2R:14257591-14259647	53.8198	136.791	-1.34576	82.9712	0.972952	-82.9822	-0.932813	3.61013	beta4GalNAcTA,CG8531
2R:14278197-14279779	157.483	191.65	-0.283274	34.1666	0.723613	-34.1678	-0.196351	1.28595	Ih
2R:14282701-14283167	217.762	304.828	-0.485245	87.0662	0.912952	-87.0676	-0.336346	2.44129	Ih
2R:14286241-14287019	52.1717	113.358	-1.11954	61.1858	0.947583	-61.196	-0.776006	2.94852	Ih
2R:14291420-14292085	75.9235	192.358	-1.34117	116.434	0.987379	-116.442	-0.929631	4.3724	Ih
2R:14292947-14295395	74.4402	132.465	-0.831456	58.0247	0.933232	-58.0306	-0.576321	2.70652	Ih
2R:14296233-14298972	128.259	101.309	0.340291	26.9495	0.725115	26.9517	0.235872	1.2914	Ih
2R:14299889-14303156	81.0674	215.511	-1.41057	134.444	0.99056	-134.451	-0.977731	4.66278	tej,Ih
2R:14355381-14356281	145.665	88.9706	0.711249	56.6939	0.924453	56.6984	0.493	2.583	CG8613,CG8617
2R:14363223-14364224	198.542	147.939	0.424443	50.603	0.856438	50.6048	0.294201	1.94099	Arc2,Tfb1
2R:14373179-14374896	161.812	58.7524	1.4616	103.059	0.984122	103.07	1.0131	4.14283	Obp50e,Obp50c,Obp50b,Obp50d,CG34185
2R:14409119-14412061	121.997	127.153	-0.0597166	5.15573	0.187506	-5.15608	-0.0413924	0.207647	CG17385,Sin1,lncRNA:CR44369
2R:14413509-14414199	140.675	150.938	-0.101594	10.2634	0.322799	-10.2639	-0.0704195	0.389787	Sin1
2R:14422213-14423399	107.047	90.2451	0.246325	16.802	0.568855	16.8038	0.170739	0.841311	Achl
2R:14429868-14431975	152.876	140.601	0.120754	12.2748	0.378219	12.2754	0.0837	0.475167	phyl
2R:14492206-14495445	124.154	60.0906	1.04692	64.0638	0.951298	64.0723	0.725672	3.02203	PRAS40
2R:14499828-14501669	78.897	88.2797	-0.162111	9.3827	0.369211	-9.3841	-0.112367	0.460784	Cpsf160
2R:14502107-14505205	96.8506	113.904	-0.233988	17.0536	0.559924	-17.0552	-0.162188	0.820807	Cpsf160,Asx
2R:14505422-14508851	161.903	89.2232	0.859643	72.6803	0.9543	72.6853	0.595859	3.08566	Asx
2R:14511124-14511787	67.1923	153.311	-1.19009	86.1183	0.973817	-86.1265	-0.824907	3.64264	Cpr51A,Asx
2R:14512138-14513319	114.212	146.147	-0.355702	31.9347	0.768804	-31.9367	-0.246554	1.46449	Cpr51A,CG30197,Asx
2R:14514898-14515846	47.2082	141.643	-1.58515	94.4344	0.981145	-94.4477	-1.09874	3.97098	Cpr51A,CG30197
2R:14526755-14528038	216.824	161.454	0.425404	55.3703	0.867455	55.372	0.294867	2.02084	ttv
2R:14570200-14571486	250.109	320.581	-0.358132	70.4719	0.839644	-70.4728	-0.248238	1.83036	LamC,ttv
2R:14591456-14593476	127.995	98.4728	0.378295	29.5226	0.761756	29.525	0.262214	1.43446	CG12869
2R:14598583-14601880	84.9507	118.055	-0.474761	33.1043	0.809746	-33.1077	-0.329079	1.65939	tra2,Polr1A,Blos1
2R:14604036-14606580	268.545	330.371	-0.29892	61.8253	0.782723	-61.826	-0.207196	1.52658	tra2,Su(var)2-HP2,CG12868,CG33468,CG33469,scaRNA:PsiU5-44
2R:14616155-14618396	49.3337	97.2303	-0.978833	47.8966	0.913868	-47.9066	-0.678475	2.45187	Sec61beta,Su(var)2-HP2
2R:14618994-14620556	252.175	400.884	-0.668762	148.709	0.963028	-148.711	-0.46355	3.29759	Sec61beta,Su(var)2-HP2,CG12863
2R:14625778-14628481	118.498	237.482	-1.00295	118.984	0.981883	-118.988	-0.695194	4.0109
2R:14636219-14637045	409.16	487.847	-0.253764	78.6872	0.723384	-78.6876	-0.175896	1.28513
2R:14664985-14666849	85.377	75.1502	0.184072	10.2269	0.40145	10.2285	0.127589	0.513246	CG12861,CG12860
2R:14668049-14670943	92.0875	93.0675	-0.0152724	0.98002	0.0431043	-0.980139	-0.010586	0.0440609	mspo,Targ
2R:14675644-14678920	153.23	150.206	0.0287476	3.02308	0.104962	3.02321	0.0199263	0.110889	mspo,CG30479,CG30480
2R:14740802-14742340	227.923	133.995	0.766362	93.9274	0.962366	93.9305	0.531202	3.27986	jef
2R:14750649-14752916	200.019	176.927	0.176983	23.092	0.550636	23.0926	0.122675	0.799922	Rpn6,CG10151,AttB,ave
2R:14753045-14756060	197.645	173.114	0.191194	24.5316	0.573333	24.5324	0.132525	0.851752	Rpn6,CG10151,ND-B15,ave
2R:14758215-14760085	46.1552	103.183	-1.16064	57.0281	0.939644	-57.0399	-0.804497	2.80749	Spred,CG12857,Trs31
2R:14770918-14772875	95.4841	92.1867	0.050702	3.29741	0.13486	3.2978	0.035144	0.144864	kn,BEAF-32,asRNA:CR42254
2R:14844905-14845589	7.09735	51.4578	-2.85804	44.3604	0.904555	-44.4524	-1.98104	2.3492	NaPi-T,CG10209
2R:14855679-14856498	201.292	246.339	-0.29136	45.0477	0.757888	-45.0486	-0.201955	1.41836	Ciao1,HPS1,CG33506
2R:14859528-14860245	20.9253	115.32	-2.46233	94.395	0.982239	-94.4271	-1.70676	4.03076	U3-55K,CG33506,Pcf11
2R:14861490-14862212	356.524	286.417	0.315881	70.1069	0.805496	70.1076	0.218952	1.6373	U3-55K,Pcf11
2R:14862376-14863360	43.3886	145.636	-1.74698	102.248	0.985013	-102.263	-1.21092	4.20055	Pcf11
2R:14864080-14865281	48.4204	72.9857	-0.591998	24.5653	0.741807	-24.5724	-0.410342	1.35405	Pcf11
2R:14867773-14870188	154.533	90.2476	0.775953	64.2853	0.940992	64.29	0.53785	2.83009	Pcf11
2R:14902118-14905309	116.612	102.882	0.180717	13.7294	0.470662	13.7305	0.125263	0.636127	Kank,Cyp317a1
2R:14946468-14947085	38.7696	132.766	-1.77588	93.9959	0.981603	-94.0127	-1.23095	3.99557	aPKC
2R:14947897-14948824	62.2464	115.878	-0.896548	53.632	0.926819	-53.6394	-0.62144	2.61482	aPKC
2R:14972700-14973793	219.531	126.426	0.796137	93.1057	0.96369	93.1091	0.55184	3.31565	ckn
2R:14981664-14985959	169.457	216.938	-0.356364	47.4811	0.818982	-47.4824	-0.247013	1.70916	ckn,pcs,tRNA:Leu-AAG-1-1
2R:15047933-15050587	199.086	141.023	0.497461	58.0629	0.894784	58.065	0.344814	2.25174	lncRNA:CR43622
2R:15067002-15068422	101.391	163.095	-0.68578	61.7037	0.931247	-61.7075	-0.475347	2.67723
2R:15130432-15132395	131.241	120.465	0.123597	10.7753	0.361094	10.776	0.0856706	0.447998	chn
2R:15134846-15136192	177.139	235.851	-0.412995	58.7122	0.862748	-58.7137	-0.286266	1.98594	chn
2R:15136351-15136617	65.6143	152.841	-1.21995	87.2265	0.974962	-87.235	-0.845603	3.68735	chn
2R:15138519-15141125	82.2552	55.7853	0.560223	26.4699	0.762341	26.4759	0.388317	1.43692	chn
2R:15141328-15143191	300.509	196.396	0.61364	104.113	0.947125	104.114	0.425343	2.93982	chn
2R:15180362-15184067	109.045	99.7695	0.128255	9.27563	0.347532	9.27651	0.0888993	0.426993	igl
2R:15185121-15188900	97.0488	103.048	-0.0865283	5.99878	0.238066	-5.9994	-0.0599769	0.271896	igl,CG43068
2R:15196521-15198432	288.374	225.512	0.354739	62.8623	0.828092	62.8633	0.245886	1.76079	GPHR
2R:15199521-15201796	120.717	249.075	-1.04495	128.358	0.9843	-128.362	-0.724306	4.15411	GPHR,CG11807,CG42391
2R:15203071-15207907	100.894	67.7107	0.575378	33.1829	0.825394	33.1879	0.398822	1.74523	CG11807,Ir51a,row,Ir51b,CG42391
2R:15208627-15210090	363.695	263.483	0.465018	100.212	0.909695	100.213	0.322326	2.40456	row,Ir51b
2R:15224137-15226392	127.58	83.8969	0.604716	43.6834	0.880051	43.6876	0.419157	2.12069	CG8079,Fs,asRNA:CR44370
2R:15279805-15281042	180.19	212.651	-0.238967	32.4608	0.673079	-32.4617	-0.165639	1.11804	Trpm
2R:15311608-15312408	161.891	184.771	-0.190719	22.8803	0.566209	-22.8811	-0.132196	0.835192	Xpc,CG8152
2R:15315972-15318146	148.474	153.322	-0.046356	4.84818	0.166183	-4.8484	-0.0321315	0.181742	Xpc,CG8155
2R:15318936-15320749	100.744	137.752	-0.451385	37.0084	0.826489	-37.0112	-0.312876	1.75151	Xpc,CG8155
2R:15354740-15358716	101.952	54.9753	0.891038	46.977	0.908422	46.9854	0.61762	2.39057	unc-5
2R:15370446-15371180	265.752	162.424	0.710313	103.328	0.96056	103.33	0.492351	3.23297	Pms2,lncRNA:CR44458,lncRNA:CR44459
2R:15377569-15380144	108.945	82.8335	0.39532	26.112	0.737863	26.115	0.274015	1.33889	dup,SRPK
2R:15382199-15384909	124.171	144.188	-0.215615	20.0163	0.584148	-20.0175	-0.149453	0.877425	SRPK
2R:15384940-15387441	175.45	160.528	0.128238	14.9223	0.417684	14.9228	0.0888876	0.540743	SRPK
2R:15424199-15425292	472.099	1187.43	-1.33068	715.327	0.997074	-715.328	-0.922355	5.83405	CG30472,Stacl
2R:15447855-15450062	187.154	89.1804	1.06943	97.9739	0.977557	97.9798	0.741272	3.79679	Stacl
2R:15465726-15467900	154.958	77.3655	1.00212	77.5926	0.963461	77.5991	0.694614	3.30936	Stacl
2R:15469145-15470966	59.0526	53.2225	0.149964	5.83009	0.255013	5.83202	0.103947	0.294388	Stacl
2R:15507342-15508083	61.0602	87.9254	-0.526048	26.8652	0.764173	-26.8704	-0.364629	1.44466	Ir52d
2R:15519604-15521312	121.601	75.3527	0.69042	46.248	0.896972	46.2531	0.478563	2.27275	Khc-73
2R:15524565-15525806	206.563	208.198	-0.011376	1.63524	0.0493893	-1.63528	-0.00788526	0.0506507	Khc-73
2R:15526841-15527292	52.3685	133.045	-1.34515	80.6767	0.971399	-80.6879	-0.932384	3.55433	Khc-73
2R:15528401-15530092	224.433	286.095	-0.350211	61.6622	0.827176	-61.6632	-0.242747	1.75548	Khc-73
2R:15531173-15533285	179.859	137.71	0.385233	42.1491	0.824351	42.1508	0.267023	1.73927	Khc-73,CG30471
2R:15538218-15539325	108.043	217.465	-1.00918	109.422	0.980102	-109.427	-0.699508	3.91713	CG8187,CG30467,CG30471
2R:15539675-15541810	181.738	232.317	-0.354231	50.5785	0.816463	-50.5797	-0.245534	1.69534	Vha36-1,CG8187,eIF2Bgamma,CG30467,asRNA:CR45927
2R:15543978-15545509	71.5543	73.2378	-0.0335501	1.68351	0.0717812	-1.68384	-0.0232552	0.0744878	eIF2Bgamma,CG8192
2R:15568339-15570449	38.5157	58.64	-0.606437	20.1243	0.676056	-20.1334	-0.42035	1.12718	Cdk5,Flo1,CG30466
2R:15579271-15583709	75.6902	75.0428	0.0123936	0.64744	0.0275573	0.647559	0.00859061	0.0279441
2R:15613542-15618862	110.399	57.0395	0.952694	53.3595	0.927532	53.368	0.660357	2.62461	CG42524
2R:15678861-15680624	117.155	132.514	-0.177727	15.359	0.492977	-15.36	-0.123191	0.679199	Gmppa,CG30091,Vha14-1
2R:15683262-15684899	88.0173	156.987	-0.834784	68.9695	0.948651	-68.9745	-0.578628	2.96912	CG30082,CG30091,asRNA:CR43429,Impbeta11
2R:15685935-15686807	549.693	282.72	0.959254	266.974	0.988524	266.975	0.664904	4.46751	CG30082,Cep89,Impbeta11
2R:15687690-15688795	102.385	57.1395	0.841443	45.2454	0.900483	45.2532	0.583244	2.30743	Cep89,Impbeta11
2R:15725297-15728845	73.7207	86.4347	-0.229542	12.7141	0.481832	-12.7161	-0.159107	0.657456	CG30089
2R:15734236-15736520	140.002	174.605	-0.318653	34.6036	0.75687	-34.6051	-0.220873	1.41416	CG30089
2R:15748022-15751739	221.231	214.616	0.0437941	6.61472	0.156845	6.61487	0.0303557	0.170604	CG30089
2R:15769289-15770054	130.176	259.384	-0.994627	129.208	0.982977	-129.212	-0.689423	4.0732	Zasp52
2R:15786679-15790006	220.544	90.1222	1.29111	130.422	0.989109	130.428	0.894931	4.51986	Zasp52
2R:15848937-15850075	345.411	231.648	0.576382	113.763	0.943817	113.765	0.399518	2.87914	tun
2R:15852525-15852967	99.4187	304.196	-1.61341	204.777	0.996412	-204.784	-1.11833	5.63022	tun
2R:15853440-15854531	455.475	281.35	0.695004	174.125	0.968397	174.126	0.48174	3.4545	tun
2R:15857811-15859304	75.0675	131.559	-0.809456	56.492	0.92944	-56.4978	-0.561072	2.65129	Gpo1,cGlr1
2R:15859444-15860474	70.6638	140.196	-0.988405	69.5325	0.956285	-69.5395	-0.68511	3.13006	Gpo1
2R:15861490-15862623	508.338	1418.54	-1.48055	910.202	0.998193	-910.203	-1.02624	6.3163	Gpo1
2R:15874728-15877412	207.564	123.396	0.750258	84.1676	0.956081	84.171	0.520039	3.12542	sli
2R:15916420-15918384	286.792	71.6042	2.00189	215.188	0.997583	215.197	1.3876	6.0251	sli,lncRNA:CR44373
2R:15928659-15930809	113.211	72.2223	0.648497	40.9886	0.873868	40.9937	0.449504	2.07042	bdg
2R:15935632-15939176	157.856	117.191	0.429748	40.665	0.834606	40.6672	0.297879	1.79942	Diap2,bug,Mlf
2R:15956251-15957268	121.388	167.45	-0.464109	46.0623	0.861018	-46.0647	-0.321696	1.97341	CG8366,Strn-Mlck
2R:15988915-15990518	63.0998	68.3276	-0.114834	5.22784	0.225547	-5.22911	-0.0795969	0.255598	CG8314,Pex11ab,Strn-Mlck,lncRNA:CR45021
2R:15991920-15994630	145.821	168.123	-0.205319	22.3021	0.590025	-22.303	-0.142316	0.89166	ATPCL,CG8314,Pex11ab,CG8320
2R:15995371-15996270	141.19	227.333	-0.687167	86.143	0.95173	-86.1457	-0.476308	3.03095	ATPCL
2R:16008257-16010802	91.6581	74.7734	0.293738	16.8847	0.586947	16.8873	0.203603	0.884178	Ufc1,CG8388,CG8389
2R:16012231-16016242	108.827	103.001	0.0793789	5.82606	0.224758	5.8266	0.0550213	0.25458	Prosbeta1,CG8388,CG8389,Rrp42,EMC7
2R:16016658-16019161	148.97	109.14	0.448844	39.83	0.838066	39.8325	0.311115	1.82057	Rrp42,EMC7,CG8399
2R:16021980-16023114	174.83	130.891	0.417579	43.9382	0.841959	43.9402	0.289444	1.8449	CG8399
2R:16023561-16024903	106.596	121.074	-0.183726	14.4772	0.481298	-14.4784	-0.127349	0.656425	CG8399,casp
2R:16027200-16033135	111.86	75.7448	0.562472	36.115	0.841705	36.1193	0.389876	1.84329	casp,CG8401,SP2353
2R:16038427-16042340	171.243	115.378	0.569669	55.8643	0.906616	55.8672	0.394864	2.37103	SP2353
2R:16042380-16043599	122.159	180.609	-0.564109	58.4498	0.90883	-58.4525	-0.39101	2.39502	SP2353
2R:16047736-16050344	139.97	151.204	-0.11138	11.2341	0.35	-11.2347	-0.0772028	0.430783	SP2353,CG8405
2R:16053266-16056379	234.18	303.391	-0.373564	69.2117	0.846234	-69.2127	-0.258935	1.87232	CG8405
2R:16058245-16059499	507.371	176.526	1.52317	330.846	0.998041	330.849	1.05578	6.23517	CG8405
2R:16083790-16084472	91.3159	135.588	-0.570287	44.2717	0.87827	-44.2754	-0.395293	2.10595	Dg
2R:16087846-16089242	336.769	206.184	0.707826	130.585	0.965903	130.587	0.490627	3.37855	Dg
2R:16099502-16103701	88.8418	67.7836	0.390303	21.0582	0.677684	21.0618	0.270537	1.13222	Rho1,Dg,CG8414,mRpL34
2R:16105781-16108117	175.565	172.028	0.0293625	3.53708	0.112239	3.5372	0.0203525	0.119053	Rho1,Ric
2R:16108121-16109804	96.8151	166.607	-0.783143	69.7916	0.946641	-69.796	-0.542833	2.93072	Rho1,Asph,Ric
2R:16109903-16110964	39.1034	140.91	-1.84941	101.807	0.985089	-101.823	-1.28191	4.20566	Asph,Ric
2R:16125368-16127888	77.9829	102.961	-0.400865	24.9779	0.727099	-24.9811	-0.277858	1.29865	CG30095,spin
2R:16143894-16147269	86.5811	78.4365	0.142526	8.14454	0.326997	8.14579	0.0987915	0.396006	CysRS,sotv,CG30094
2R:16148172-16150197	218.573	215.022	0.0236303	3.5509	0.087201	3.55098	0.0163793	0.0912396	sotv,CG10731,lbk
2R:16164718-16168491	93.5072	111.916	-0.259263	18.4085	0.596972	-18.4103	-0.179707	0.908749	lbk
2R:16170253-16170731	32.8581	140.187	-2.09303	107.329	0.987277	-107.349	-1.45078	4.36437	lbk,CG8435,Ptp52F
2R:16182232-16186723	102.84	101.162	0.0237377	1.67826	0.0655471	1.67843	0.0164537	0.067794	Lis-1,CG8441,clu
2R:16190083-16191801	145.404	82.7288	0.813606	62.6752	0.940305	62.6805	0.563948	2.81851	clu
2R:16196756-16198187	379.083	315.056	0.266907	64.0273	0.747939	64.0279	0.185006	1.37808	CG42837,caly,CG44242,Lipt1
2R:16200325-16202393	153.899	131.395	0.228069	22.5035	0.615089	22.5047	0.158085	0.954743	Shark,mrj,CG42837,Lipt1
2R:16204683-16207660	102.498	69.2235	0.566261	33.2744	0.825064	33.2792	0.392502	1.74333	mrj,tRNA:Gln-CTG-1-1
2R:16212068-16213111	60.9371	86.7041	-0.50878	25.767	0.75028	-25.772	-0.352659	1.38741	mrj
2R:16215667-16219154	155.566	107.01	0.539784	48.5562	0.886463	48.5592	0.37415	2.17563	mrj,tRNA:Glu-TTC-1-1,tRNA:Glu-CTC-1-1,tRNA:Glu-TTC-1-2
2R:16258171-16260159	226.068	101.01	1.16226	125.058	0.986183	125.064	0.805619	4.28187	CngA
2R:16263765-16265768	201.996	164.041	0.300267	37.9546	0.751832	37.9558	0.20813	1.39365	csul,fidipidine
2R:16267734-16270084	44.864	54.0267	-0.268113	9.16267	0.387125	-9.16659	-0.185842	0.489594	Khc,csul
2R:16316033-16317357	254.166	227.832	0.1578	26.3339	0.523104	26.3344	0.109379	0.740458	CG8060,Nox
2R:16322871-16326238	120.752	85.8396	0.492327	34.912	0.825013	34.9154	0.341255	1.74304	CG4282,CG30096,Vha44
2R:16328467-16331016	128.756	83.8911	0.618046	44.8645	0.886234	44.8688	0.428397	2.17361	Vha44
2R:16332313-16333284	175.354	156.829	0.161086	18.5259	0.49458	18.5266	0.111656	0.682366	Vha44
2R:16333619-16334673	270.6	209.662	0.368095	60.9377	0.841272	60.9388	0.255144	1.84056	Vha44
2R:16337994-16342414	56.2469	90.332	-0.683464	34.0851	0.838499	-34.092	-0.473741	1.82324	Hmgs,CG7997
2R:16343464-16345614	62.0475	61.4015	0.015098	0.645948	0.0289059	0.646124	0.0104651	0.0293319	CG7997,Nup62,wcd
2R:16398489-16399634	376.002	193.82	0.956023	182.182	0.986234	182.185	0.662665	4.28556	Sema2b
2R:16412330-16416441	197.262	141.6	0.478293	55.6621	0.885649	55.6642	0.331527	2.16848	Menl-2,Menl-1,Sema2b
2R:16418425-16419147	163.796	189.097	-0.207225	25.3008	0.606056	-25.3016	-0.143637	0.931546	Menl-2,Menl-1,Sema2b
2R:16421021-16425903	105.939	58.0305	0.86835	47.9085	0.911069	47.9163	0.601894	2.41989	Sema2b
2R:16562600-16564819	69.3718	34.6698	1.00067	34.702	0.848779	34.7164	0.693611	1.88901	DAT
2R:16569538-16570768	91.1377	108.201	-0.247589	17.063	0.572468	-17.0648	-0.171616	0.849727	CG4945,RpS15
2R:16582428-16583939	101.341	67.8491	0.578816	33.4919	0.827608	33.4969	0.401204	1.75799	Cdk4,asRNA:CR44375
2R:16629304-16630273	60.9512	164.563	-1.43292	103.612	0.984046	-103.622	-0.993223	4.13803	Alk
2R:16630969-16633800	98.7774	91.6724	0.107694	7.10505	0.282137	7.10586	0.0746479	0.331477	Alk
2R:16633886-16634173	48.8443	119.079	-1.28565	70.2344	0.961654	-70.2462	-0.891147	3.2611	Alk
2R:16634242-16636645	233.93	149.107	0.649727	84.8229	0.946336	84.8254	0.450357	2.92501	Alk
2R:16639388-16642260	122.143	88.768	0.460454	33.3746	0.80944	33.3777	0.319163	1.65779	gprs,Alk
2R:16644572-16646746	80.1888	69.3505	0.209495	10.8383	0.427303	10.8404	0.145211	0.557398	gprs
2R:16650528-16651278	88.4844	126.944	-0.520697	38.4596	0.847303	-38.4631	-0.36092	1.8793	Amyrel,gprs
2R:16672235-16672802	103.088	191.709	-0.89504	88.6209	0.967608	-88.6254	-0.620395	3.42985	Pgant9,CG34457,CG34458
2R:16700863-16703268	187.37	101.08	0.890393	86.29	0.965929	86.2946	0.617173	3.3793	Pgant9
2R:16703339-16705250	469.309	503.222	-0.100656	33.9125	0.371552	-33.9127	-0.0697691	0.464502	Pgant9
2R:16706636-16709148	247.721	117.253	1.07909	130.468	0.985598	130.472	0.747968	4.24039	Pgant9
2R:16716292-16717438	465.916	537.797	-0.206994	71.8818	0.652316	-71.8821	-0.143477	1.05646	Pgant9
2R:16719897-16722297	193.581	128.036	0.596391	65.5454	0.924631	65.5481	0.413386	2.58536	Pgant9
2R:16752158-16754589	187.214	179.312	0.0622185	7.90228	0.218295	7.90252	0.0431265	0.246278	CG5267,Acp53C14c,CG34189,unc-104
2R:16754619-16756351	304.423	197.572	0.6237	106.851	0.949771	106.853	0.432316	2.99116	CG5267,CG34189,unc-104
2R:16758294-16760115	86.4534	89.4636	-0.0493779	3.01019	0.126183	-3.01059	-0.0342261	0.134885	unc-104
2R:16760254-16761718	124.093	135.49	-0.126762	11.3968	0.382137	-11.3975	-0.0878651	0.481489	unc-104
2R:16773168-16776245	62.5219	86.5473	-0.469127	24.0254	0.726539	-24.03	-0.325174	1.2966	Sod2,Arp53D,unc-104
2R:16783707-16785283	514.245	710.765	-0.466916	196.52	0.916565	-196.52	-0.323641	2.48369	resilin,RalGPS
2R:16790885-16792896	127.545	144.159	-0.176654	16.6139	0.507506	-16.6148	-0.122447	0.708274	RalGPS,CG15615,CG15919
2R:16852687-16854537	197.801	156.883	0.334366	40.9186	0.784173	40.92	0.231765	1.53328	IntS8,Fen1
2R:16854602-16855100	174.234	387.082	-1.15162	212.848	0.992417	-212.851	-0.798239	4.88189	IntS8,Fen1
2R:16868511-16869738	112.545	250.84	-1.15627	138.295	0.988193	-138.3	-0.801466	4.4391	Psi,eEF1beta,CG6426
2R:16941673-16943372	46.6192	71.2632	-0.612234	24.644	0.743588	-24.6516	-0.424368	1.36097	Pkc53E
2R:16949100-16952847	97.8362	105.277	-0.105754	7.44113	0.28883	-7.44188	-0.0733034	0.340843	Ufm1,mute,Vha16-4
2R:16954627-16956059	52.6312	131.201	-1.31778	78.5694	0.969186	-78.5804	-0.913418	3.47978	mute,PIG-V
2R:16959012-16959881	66.7245	105.702	-0.663711	38.9772	0.865191	-38.9829	-0.460049	2.0039	CG6665,CG9010
2R:16996457-16998506	59.349	57.0881	0.056035	2.26095	0.10084	2.26165	0.0388405	0.106294	Cbp53E,ste24b,CG30461,ste24c
2R:17001446-17002616	34.4114	167.034	-2.27918	132.622	0.992366	-132.642	-1.57981	4.8752	NiPp1,ste24a,AsnRS-m
2R:17003048-17005786	236.515	166.969	0.50235	69.5457	0.906107	69.5475	0.348202	2.3656	NiPp1,AsnRS-m,CG6805
2R:17012163-17013394	111.511	135.732	-0.283567	24.2203	0.671018	-24.222	-0.196554	1.11175	Ehbp1
2R:17015136-17017810	81.1392	140.061	-0.787579	58.9213	0.932926	-58.9266	-0.545908	2.70196	Ehbp1,CG8963
2R:17020661-17021003	171.653	87.1966	0.977152	84.4564	0.968219	84.4621	0.67731	3.44888	Dark
2R:17023918-17025594	132.401	118.902	0.155145	13.4994	0.447277	13.5003	0.107539	0.592899	Dark,asRNA:CR44390
2R:17026815-17029447	152.623	113.307	0.429732	39.3158	0.829669	39.3181	0.297868	1.77001	RhoGEF2,Dark,asRNA:CR44390
2R:17037381-17040052	97.7958	89.3509	0.13029	8.44489	0.32771	8.44589	0.0903102	0.397065	RhoGEF2,asRNA:CR45144,asRNA:CR45145
2R:17041893-17043779	113.587	111.148	0.0313187	2.43923	0.0938422	2.43943	0.0217085	0.0985419	RhoGEF2,SmydA-7,asRNA:CR45145
2R:17046003-17048509	110.831	46.5936	1.25015	64.2371	0.954224	64.2492	0.86654	3.08399	SmydA-7,SmydA-6,CG9646
2R:17051806-17054141	96.8657	106.216	-0.132948	9.35067	0.348804	-9.35161	-0.0921527	0.428945	fat-spondin,CG9646,tef
2R:17056947-17059038	65.9786	70.0288	-0.0859499	4.05019	0.177303	-4.0511	-0.0595759	0.195167	fat-spondin,CG8950,tef
2R:17091327-17092718	180.405	138.286	0.383579	42.1185	0.819008	42.1203	0.265877	1.7093	GstS1,Sply,CG6984
2R:17261659-17262405	227.114	305.433	-0.427442	78.3195	0.884809	-78.3207	-0.29628	2.16117	mbl,lncRNA:CR45997
2R:17332896-17336774	100.723	69.5922	0.533397	31.1309	0.805573	31.1355	0.369723	1.6377	mbl
2R:17341560-17342852	234.721	250.392	-0.0932388	15.6705	0.327252	-15.6708	-0.0646282	0.396384	mbl
2R:17415520-17417996	100.864	108.289	-0.102485	7.42572	0.279059	-7.42643	-0.0710374	0.327197	cnk
2R:17418218-17419985	55.106	107.592	-0.965291	52.4862	0.926056	-52.495	-0.669089	2.60445	l(2)k01209,cnk
2R:17420894-17424231	143.972	191.368	-0.410566	47.3965	0.846132	-47.3983	-0.284583	1.87166	l(2)k01209,cnk
2R:17425549-17427237	242.179	281.617	-0.217665	39.4389	0.656336	-39.4395	-0.150874	1.06809	l(2)k01209,CG6550,Mtap
2R:17431235-17433731	185.1	129.914	0.510748	55.186	0.892697	55.1883	0.354024	2.2321	Bap55,EDTP,Lhr
2R:17433827-17435374	74.3345	212.269	-1.51379	137.935	0.991807	-137.943	-1.04928	4.80443	EDTP
2R:17444396-17445898	167.817	312.563	-0.89726	144.746	0.980992	-144.749	-0.621933	3.96291	EDTP,mthl4
2R:17453938-17456886	126.279	98.1826	0.363079	28.0967	0.74257	28.099	0.251667	1.35701	robl,CG14478,CG10764,robls54B
2R:17457840-17460627	187.01	175.421	0.0922973	11.5894	0.311959	11.5898	0.0639756	0.373907	robl,CG14478
2R:17462499-17464156	203.038	124.256	0.708434	78.782	0.948702	78.7851	0.491049	2.97011	CG14478
2R:17467364-17469120	60.0586	95.8776	-0.674823	35.819	0.849288	-35.8254	-0.467752	1.89238	qkr54B,Tes
2R:17470400-17474522	140.154	75.8667	0.885477	64.2876	0.946819	64.2937	0.613766	2.93406	qkr54B,insb
2R:17514445-17515600	33.1261	140.418	-2.08369	107.292	0.987252	-107.312	-1.4443	4.36237	CG4847,CG4853
2R:17516415-17517560	175.683	229.299	-0.384258	53.6162	0.840153	-53.6176	-0.266347	1.83354	CG4853,APC10,CG4866
2R:17518834-17519367	33.8914	116.703	-1.78385	82.8115	0.974529	-82.8307	-1.23647	3.67023	APC10,CG4866,Patronin
2R:17521103-17522262	198.537	215.834	-0.120511	17.2965	0.409873	-17.297	-0.083532	0.527417	Patronin
2R:17523758-17526381	185.546	159.214	0.220809	26.332	0.62458	26.3329	0.153053	0.97971	Patronin
2R:17526631-17527861	129.083	117.667	0.133578	11.415	0.382392	11.4158	0.0925891	0.481901	Patronin
2R:17530167-17532000	54.5074	71.1015	-0.383429	16.5942	0.598601	-16.5986	-0.265773	0.912798	Patronin
2R:17535834-17537590	89.1104	137.695	-0.627812	48.5848	0.899211	-48.5888	-0.435166	2.29473	eIF3b,Patronin
2R:17539760-17540532	27.7227	67.3693	-1.28102	39.6466	0.880738	-39.6673	-0.887938	2.12643	eIF3b,Cc2d2a
2R:17550333-17552203	221.318	151.521	0.546602	69.7969	0.918626	69.799	0.378876	2.5087	MESR4
2R:17553560-17554936	74.9702	67.7499	0.146099	7.22032	0.30341	7.2218	0.101268	0.361558	MESR4
2R:17566423-17567243	88.9179	121.15	-0.446249	32.2321	0.800585	-32.2352	-0.309316	1.61237	CG14480,Ns2,CG46428
[truncated: 4,552 more rows]
