# Supplementary material for: Notch signaling and Bsh homeodomain activity are integrated to diversify Drosophila lamina neuron types
Source: bioRxiv preprint, doi:10.1101/2023.06.15.545141, version 3 (2023-11-07)
Supplement: Supplemental Table 4 [file 545141_file05.xlsx]

## Sheet: Sheet 1 - bsh_noiseq_results
bsh_noiseq_results
	bsh_dam_l4_mean	bsh_dam_l5_mean	M	D	prob	ranking	log.rat	log.prob	genes
2L:55594-60342	41.315	93.236	-1.17422	51.921	0.888919	-51.9343	-0.813909	2.19749	Cda5,lncRNA:CR46254
2L:65608-67817	291.101	289.15	0.00970057	1.95077	0.0540432	1.9508	0.00672392	0.0555584	Cda5,dbr,lncRNA:CR45339,lncRNA:CR45340
2L:71492-73420	272.156	343.61	-0.336338	71.4539	0.759041	-71.4547	-0.233131	1.42313	galectin,dbr,asRNA:CR44987
2L:76694-78469	120.526	165.332	-0.456024	44.8061	0.794131	-44.8084	-0.316092	1.58051	galectin,CG11374
2L:84651-89087	82.4708	91.6898	-0.152878	9.21904	0.379934	-9.22031	-0.105967	0.477929	net
2L:92608-95514	83.1132	47.9535	0.793442	35.1597	0.803764	35.1687	0.549972	1.62844	Zir
2L:107857-111963	118.197	72.1732	0.711656	46.0236	0.85023	46.0291	0.493282	1.89866	Sam-S
2L:128081-131214	206.918	164.529	0.330713	42.3884	0.723258	42.3897	0.229232	1.28467	Gs1,CG3164,ND-15
2L:133114-137363	91.8309	79.7822	0.202912	12.0487	0.461691	12.0504	0.140648	0.619323	Gs1,ND-15,lncRNA:CR44185,lncRNA:CR44186
2L:154674-156305	134.306	102.898	0.384305	31.4077	0.719838	31.4101	0.26638	1.27239	CG3709,ND-15,CG3436
2L:163668-169192	136.637	161.682	-0.242806	25.0446	0.599437	-25.0457	-0.1683	0.914884	spen
2L:171381-173206	65.1748	78.2273	-0.263358	13.0525	0.510125	-13.0552	-0.182546	0.713604	spen
2L:177295-179845	408.559	364.268	0.165545	44.2912	0.529413	44.2915	0.114747	0.753775	spen
2L:219502-223445	261.086	243.962	0.0978719	17.1246	0.347906	17.1249	0.0678397	0.427566	lncRNA:CR44220,lncRNA:CR44222,kis
2L:234388-235763	35.0997	69.3115	-0.981636	34.2118	0.798735	-34.2259	-0.680418	1.60313	CG13693,kis
2L:242140-246650	106.694	103.091	0.0495582	3.60282	0.160789	3.60317	0.0343511	0.175293	mir-965,kis
2L:284480-287193	251.142	193.803	0.373911	57.3389	0.770037	57.3401	0.259175	1.46984	Amnionless,CG3625,asRNA:CR46262,asRNA:CR46263
2L:297059-299285	108.1	74.4612	0.537807	33.6389	0.775669	33.6432	0.372779	1.49463	Pi3K21B,Stip1
2L:305030-309288	97.3946	76.7977	0.342779	20.5969	0.635264	20.5998	0.237596	1.00858	Plc21C,Pi3K21B,lncRNA:CR43719
2L:310949-313372	215.779	158.233	0.447506	57.5463	0.811653	57.5481	0.310188	1.66947	Plc21C
2L:316864-320319	94.782	234.513	-1.30698	139.731	0.982231	-139.737	-0.905933	4.03033	Plc21C,CG11912,CG11911
2L:336050-337681	39.9444	120.606	-1.59424	80.6618	0.956685	-80.6775	-1.10504	3.13926	Plc21C
2L:369526-369894	51.9101	68.9398	-0.409322	17.0297	0.608578	-17.0346	-0.28372	0.937969
2L:431187-432614	40.027	108.075	-1.43299	68.0483	0.934782	-68.0634	-0.993275	2.73001	ex
2L:432688-434702	40.6614	76.8092	-0.917618	36.1477	0.811922	-36.1594	-0.636044	1.6709	ex
2L:435014-436469	40.5219	106.431	-1.39315	65.9095	0.929775	-65.9242	-0.965659	2.65605	ex
2L:452009-453575	99.7094	55.5019	0.845193	44.2075	0.853046	44.2156	0.585843	1.91764	crq,shv
2L:465149-467206	138.5	103.539	0.419712	34.9609	0.749788	34.9634	0.290922	1.38545	CG4297
2L:468632-471295	265.342	184.372	0.525235	80.9703	0.86297	80.972	0.364065	1.98755	CG4297
2L:477266-482726	114.982	121.711	-0.0820502	6.72891	0.256269	-6.72941	-0.0568728	0.296076	ush,cbt
2L:490965-492377	79.841	101.225	-0.34237	21.3844	0.642394	-21.3871	-0.237312	1.02832	ush,lncRNA:CR46258
2L:498535-501195	79.7845	56.3722	0.501125	23.4123	0.695387	23.4177	0.347353	1.18871	ush,lncRNA:CR46259
2L:508566-513592	387.645	307.635	0.333515	80.0095	0.755264	80.0102	0.231175	1.40757	ush
2L:518089-519888	589.152	656.879	-0.156988	67.7271	0.51303	-67.7273	-0.108816	0.719553	ush
2L:521248-528703	94.8055	69.0662	0.45699	25.7393	0.71054	25.7433	0.316762	1.23974	ush
2L:552449-552772	38.527	253.714	-2.71926	215.187	0.99857	-215.205	-1.88485	6.54978	Ets21C,rempA
2L:555381-556237	38.1471	58.7857	-0.62389	20.6385	0.669595	-20.648	-0.432448	1.10743	rempA
2L:608402-609058	44.3377	76.1003	-0.779369	31.7626	0.780184	-31.7722	-0.540217	1.51497	lncRNA:CR43649
2L:681926-685048	36.3164	130.689	-1.84744	94.3727	0.971883	-94.3908	-1.28055	3.57139	ds
2L:700767-703305	138.784	146.277	-0.0758613	7.49297	0.263533	-7.49335	-0.0525831	0.305891	ds
2L:708283-708855	39.8754	68.6057	-0.782829	28.7303	0.75609	-28.7409	-0.542616	1.41096	ds
2L:709090-711360	49.5744	61.1748	-0.303343	11.6004	0.492803	-11.6044	-0.210261	0.678856	lncRNA:CR44988,ds
2L:720414-721199	47.9104	87.8863	-0.875299	39.9759	0.834741	-39.9855	-0.606711	1.80024	lncRNA:CR46260
2L:730779-732205	85.9713	94.5832	-0.137729	8.61191	0.360422	-8.61301	-0.0954665	0.446947	Hsp60B
2L:735461-736768	44.4719	206.917	-2.21809	162.445	0.995888	-162.46	-1.53746	5.49373	Eaat2
2L:739649-740562	90.6585	81.2681	0.157753	9.3904	0.391064	9.39172	0.109346	0.496043	Eaat2
2L:761854-765320	113.683	65.5539	0.79426	48.1289	0.863931	48.1355	0.550539	1.99459	GABA-B-R3
2L:776872-777732	115.142	458.621	-1.99389	343.479	0.998592	-343.485	-1.38206	6.56553	CG13946
2L:789474-790812	118.945	121.002	-0.024744	2.05764	0.0805954	-2.05779	-0.0171512	0.084029	Pkg21D,CG3544
2L:815279-816449	84.9479	39.5291	1.10366	45.4188	0.862724	45.4322	0.765	1.98576	Saf6,Pex12,CG15880
2L:826462-828972	207.938	192.425	0.11186	15.5134	0.368155	15.5138	0.0775354	0.459111	dock,CG3862
2L:842125-842984	42.1805	70.8116	-0.747409	28.6311	0.755018	-28.6408	-0.518065	1.40657	drongo
2L:845261-849317	71.1277	78.1638	-0.136088	7.03605	0.328752	-7.03737	-0.0943291	0.398616	drongo
2L:865426-868451	348.491	302.883	0.202362	45.6084	0.582316	45.6088	0.140267	0.873031	dbe,aru,snoRNA:Me28S-U1230
2L:891897-897067	81.5708	67.2906	0.277647	14.2802	0.53737	14.2829	0.192451	0.770827	lncRNA:CR45348
2L:901624-905936	101.384	83.8683	0.273631	17.5156	0.574315	17.5177	0.189666	0.854056	Lsp1beta,snRNA:U1:21D,lncRNA:CR45261,scaRNA:MeU1:95C-A24
2L:923379-925910	101.866	55.5486	0.874853	46.3176	0.862948	46.3259	0.606402	1.98739	CG4341
2L:927942-932047	116.645	60.9429	0.936597	55.7022	0.896138	55.7101	0.649199	2.26469	CG4341
2L:938784-942480	224.812	295.027	-0.392128	70.2151	0.792902	-70.2162	-0.271803	1.57456	CG4341
2L:946616-951888	89.0563	62.4478	0.512069	26.6086	0.724264	26.6135	0.354939	1.28831	CG4341
2L:953351-956509	105.586	60.7775	0.79681	44.8085	0.852957	44.8156	0.552307	1.91703	CG4341
2L:956800-958031	95.4725	106.892	-0.162995	11.4194	0.420947	-11.4205	-0.11298	0.546361	CG4341
2L:961469-964038	265.866	202.564	0.392323	63.3022	0.787761	63.3034	0.271937	1.55004
2L:969127-971690	96.0842	61.3199	0.647945	34.7643	0.794332	34.7704	0.449121	1.58149
2L:1047027-1049317	288.481	305.269	-0.0816045	16.7879	0.295695	-16.7881	-0.0565639	0.350544	S,IA-2
2L:1052367-1052983	36.8167	61.0125	-0.728742	24.1957	0.711904	-24.2067	-0.505126	1.24446	S
2L:1055763-1057095	397.925	379.912	0.0668325	18.0133	0.268316	18.0134	0.0463247	0.312407	S
2L:1064637-1068795	80.5285	86.7876	-0.107991	6.25917	0.288029	-6.26011	-0.0748535	0.339718	S
2L:1072695-1077079	44.9097	79.5174	-0.824243	34.6077	0.800702	-34.6175	-0.571322	1.61295	S,ast
2L:1095027-1096710	183.735	101.163	0.860939	82.5716	0.931563	82.5761	0.596758	2.68184	CG4629
2L:1117623-1122672	59.2855	88.882	-0.584213	29.5966	0.755487	-29.6023	-0.404946	1.40849	Pino
2L:1123884-1126049	105.381	148.605	-0.495869	43.2241	0.803339	-43.2269	-0.34371	1.62627	Pino
2L:1127471-1129096	213.264	286.116	-0.423958	72.8516	0.810469	-72.8528	-0.293865	1.6632	Pino,TBC1D23
2L:1134204-1138197	88.05	87.4984	0.00906631	0.551596	0.0341737	0.551671	0.00628429	0.0347713	Iris,CG4577
2L:1141699-1144200	109.006	108.877	0.00171852	0.12977	0.0094095	0.129781	0.00119119	0.00945405	CG4577,MFS3,lncRNA:CR45717
2L:1155374-1158979	117.478	110.246	0.0916652	7.23208	0.278821	7.23266	0.0635375	0.326868	Tango14,capt,asRNA:CR43767
2L:1172106-1173302	108.44	64.1918	0.756435	44.2481	0.848129	44.2546	0.524321	1.88473	Charon,CG4887
2L:1254528-1257249	189.598	220.388	-0.217099	30.7895	0.593134	-30.7903	-0.150481	0.899271	robo3
2L:1311514-1315614	121.135	114.965	0.0754224	6.17012	0.249095	6.17058	0.0522788	0.286476
2L:1330056-1334678	91.2659	111.798	-0.292751	20.5324	0.611148	-20.5345	-0.20292	0.944557	a5,CG5440
2L:1335754-1340162	84.2909	97.1435	-0.204741	12.8526	0.473113	-12.8543	-0.141916	0.640768	CG5440
2L:1347504-1351425	92.0238	55.0286	0.741827	36.9953	0.813889	37.0027	0.514196	1.68141	CG5556
2L:1360361-1362822	78.2629	91.5991	-0.227005	13.3362	0.500067	-13.3381	-0.157348	0.693281	CG31659,NLaz
2L:1404808-1405826	285.608	270.913	0.0762099	14.6956	0.292432	14.6958	0.0528247	0.345922	robo2
2L:1419837-1422655	68.0053	76.2419	-0.164937	8.23662	0.368558	-8.23827	-0.114326	0.459748	robo2
2L:1431175-1432751	74.7458	187.612	-1.32769	112.866	0.976644	-112.874	-0.920282	3.7569	unknown
2L:1436050-1437129	73.5125	69.2265	0.086665	4.28599	0.219324	4.28687	0.0600716	0.247595
2L:1441013-1442967	45.0535	67.5762	-0.584877	22.5227	0.69161	-22.5303	-0.405406	1.17639	CG43402
2L:1453221-1458479	122.099	107.335	0.185929	14.7639	0.485897	14.765	0.128876	0.665331
2L:1459783-1462524	78.5427	124.367	-0.663059	45.8246	0.843324	-45.8294	-0.459597	1.85357
2L:1574753-1579560	62.0289	74.858	-0.271215	12.8291	0.509655	-12.8319	-0.187992	0.712647	haf
2L:1580501-1584741	50.1623	136.749	-1.44685	86.5864	0.963144	-86.5984	-1.00288	3.30074	nis,haf
2L:1602231-1605267	121.249	52.3432	1.2119	68.9057	0.934424	68.9164	0.840024	2.72455	Rab3GAP1,haf
2L:1644646-1648164	104.466	164.246	-0.652826	59.7802	0.872424	-59.7838	-0.452504	2.05904	lncRNA:CR45695
2L:1649740-1653409	161.338	116.461	0.470235	44.8765	0.797953	44.879	0.325942	1.59925	chinmo
2L:1657474-1660143	354.877	456.357	-0.362845	101.48	0.782106	-101.481	-0.251505	1.52375	chinmo
2L:1668292-1670342	105.768	101.875	0.0541048	3.89311	0.165661	3.89349	0.0375026	0.181115	chinmo
2L:1719814-1720891	103.923	101.95	0.0276549	1.97312	0.0967771	1.97331	0.0191689	0.101786	Rim2
2L:1722016-1722950	579.632	463.244	0.323364	116.388	0.750905	116.388	0.224139	1.38992	Rim2
2L:1723891-1724647	235.631	123.138	0.936255	112.493	0.952908	112.497	0.648962	3.05565	Eno,Rim2
2L:1727557-1728544	300.949	254.449	0.242146	46.5006	0.641433	46.5013	0.167843	1.02564	Eno,Rrp40
2L:1730786-1733295	87.7171	101.59	-0.211822	13.8725	0.493876	-13.8741	-0.146824	0.680974	CG31937,CG17652,CG17646
2L:1735513-1737474	56.747	121.386	-1.09699	64.6395	0.923428	-64.6488	-0.760377	2.56952	CG17646
2L:1738568-1740156	40.1269	150.325	-1.90544	110.198	0.982008	-110.215	-1.32075	4.01783	CG17646
2L:1742519-1745377	62.1809	82.5852	-0.40941	20.4042	0.652295	-20.4083	-0.283781	1.0564	CG17646
2L:1745473-1748370	62.4395	125.711	-1.00958	63.2718	0.917102	-63.2799	-0.69979	2.49015	CG17646
2L:1748399-1748920	164.792	257.63	-0.644656	92.8383	0.898865	-92.8405	-0.446841	2.2913	CG17646
2L:1751831-1754399	116.985	73.2434	0.675554	43.7417	0.838541	43.7469	0.468258	1.8235	CG17712,CG17648,Gr22f
2L:1755765-1758975	109.546	164.783	-0.589035	55.2374	0.85251	-55.2405	-0.408288	1.91399	CG17650,Gr22f
2L:1787375-1789404	139.205	119.533	0.219802	19.6719	0.553104	19.6731	0.152355	0.80543	Gr22d
2L:1880362-1880827	43.1422	89.1619	-1.04733	46.0198	0.865563	-46.0317	-0.725953	2.00666	CG31663
2L:1884120-1886507	120.406	65.4539	0.87935	54.9516	0.891087	54.9586	0.609519	2.2172	CG15358,Wdr62
2L:1888316-1891041	228.814	195.981	0.223458	32.8325	0.597537	32.8333	0.154889	0.910152	Wdr62
2L:1891308-1893622	155.537	110.773	0.48965	44.764	0.803876	44.7667	0.339399	1.62901	Wdr62
2L:1902250-1903807	230.955	207.693	0.153159	23.262	0.470833	23.2625	0.106162	0.636451	Wdr62
2L:1906584-1908147	564.568	603.448	-0.0960827	38.8803	0.36259	-38.8804	-0.0665995	0.450342	Wdr62
2L:1911471-1915896	190.179	163.912	0.214438	26.2672	0.569219	26.2681	0.148637	0.842156	Wdr62
2L:1916962-1920532	104.585	106.543	-0.0267695	1.95871	0.0965312	-1.95889	-0.0185552	0.101514	Wdr62
2L:1924580-1927446	119.197	123.353	-0.0494469	4.15616	0.169259	-4.15646	-0.034274	0.185438	Wdr62
2L:1930849-1934486	101.454	57.1222	0.828709	44.3323	0.852756	44.34	0.574417	1.91566	Wdr62
2L:1947499-1948857	421.915	433.842	-0.0402199	11.9278	0.165974	-11.9278	-0.0278783	0.18149	CG33673
2L:1986013-1988060	177.778	147.787	0.266555	29.9907	0.644942	29.9919	0.184762	1.03547	Got2,Npc2a
2L:1989081-1992160	40.6373	97.0061	-1.25527	56.3688	0.90519	-56.3828	-0.870088	2.35588	Npc2a,Obp22a,lncRNA:CR42874
2L:2005544-2007641	149.88	77.6254	0.949205	72.2544	0.928054	72.2606	0.657939	2.63184	Nplp4,CG15353,CG33543,asRNA:CR45712
2L:2011004-2013955	229.837	185.213	0.311425	44.6239	0.711367	44.6249	0.215863	1.2426	CG4238,tRNA:Gln-CTG-2-5,tRNA:Gln-CTG-2-4,tRNA:Gln-CTG-3-1,snoRNA:Or-CD14
2L:2038552-2040407	302.069	241.974	0.320027	60.0952	0.736243	60.096	0.221826	1.33273	Su(dx)
2L:2073691-2078246	81.4355	66.7576	0.286726	14.6779	0.546601	14.6807	0.198743	0.790982	dpr3
2L:2131139-2133889	126.468	61.5891	1.03802	64.8788	0.921438	64.8871	0.719503	2.54387	GlyP
2L:2152179-2153862	133.341	52.5256	1.34403	80.8158	0.955009	80.8269	0.931612	3.10129	Tbcd,AIF
2L:2161235-2161532	38.6358	137.85	-1.83508	99.2137	0.975213	-99.2307	-1.27198	3.69745	aop
2L:2162271-2163227	165.482	224.349	-0.439073	58.8673	0.808636	-58.869	-0.304342	1.65358	aop
2L:2163232-2164548	61.3081	111.284	-0.860096	49.9758	0.875061	-49.9832	-0.596173	2.07993	aop
2L:2165245-2166572	42.3741	99.6456	-1.23362	57.2715	0.907648	-57.2848	-0.855083	2.38215	aop
2L:2166785-2168618	77.2384	105.112	-0.444535	27.8735	0.721447	-27.877	-0.308128	1.27815	aop
2L:2168756-2176324	88.2005	118.738	-0.428926	30.5377	0.733584	-30.5407	-0.297309	1.32269	aop
2L:2177403-2179840	188.849	245.336	-0.377531	56.4878	0.775781	-56.4891	-0.261685	1.49513	aop
2L:2195270-2195802	305.096	330.092	-0.113604	24.9957	0.385365	-24.996	-0.078744	0.486727	COX7AL2
2L:2197045-2199445	353.209	305.408	0.209782	47.8005	0.599213	47.8009	0.14541	0.914326	COX7AL2
2L:2201349-2203063	518.671	522.616	-0.0109329	3.94548	0.0574628	-3.9455	-0.00757813	0.0591799	CG31668
2L:2242156-2242525	42.187	193.185	-2.19511	150.998	0.994524	-151.014	-1.52154	5.20741	CG4267
2L:2310257-2312320	91.0869	117.776	-0.370733	26.6894	0.691274	-26.6919	-0.256973	1.1753	CG9967,eys
2L:2319616-2324165	127.842	134.364	-0.0717866	6.52216	0.235059	-6.52256	-0.0497587	0.267956	CG9967,eys
2L:2328198-2336139	68.0119	87.4806	-0.363175	19.4687	0.63066	-19.4721	-0.251734	0.996038	CG9967,eys
2L:2340213-2344663	96.5998	71.8092	0.427852	24.7907	0.696706	24.7943	0.296565	1.19305	CG9967,eys
2L:2355058-2356802	51.8116	128.143	-1.3064	76.3311	0.948706	-76.3423	-0.905531	2.97018	CG9967,eys
2L:2362612-2366076	180.889	127.93	0.499749	52.9589	0.823678	52.9612	0.3464	1.73544	Rab5,Axud1
2L:2373984-2377175	79.4706	56.1725	0.500556	23.2981	0.694403	23.3034	0.346959	1.18549	CG3609,CG15390,Atxn7,asRNA:CR44982
2L:2427590-2429839	32.5867	119.029	-1.86895	86.4418	0.963971	-86.462	-1.29546	3.32344	dpp,lncRNA:CR44912
2L:2433478-2435098	42.2417	91.5949	-1.1166	49.3532	0.879219	-49.3658	-0.773967	2.11377	dpp
2L:2448710-2450080	39.7049	69.9915	-0.817864	30.2866	0.769143	-30.2977	-0.5669	1.46596	dpp
2L:2451023-2452281	39.6339	108.796	-1.45683	69.1626	0.93733	-69.1779	-1.00979	2.76987	dpp
2L:2459974-2460565	133.537	99.6525	0.422261	33.8845	0.74572	33.8871	0.292689	1.36932	dpp,tRNA:Tyr-GTA-1-2
2L:2480579-2482033	194.896	226.263	-0.2153	31.3676	0.594453	-31.3683	-0.149235	0.902518
2L:2493024-2495386	158.496	58.1574	1.44641	100.339	0.973649	100.349	1.00258	3.63625	oaf,Slh
2L:2497662-2501385	137.041	74.556	0.878211	62.485	0.907469	62.4912	0.608729	2.38022	oaf
2L:2503431-2512291	87.5612	92.042	-0.0720007	4.4808	0.205132	-4.48138	-0.0499071	0.229579	lncRNA:CR44607
2L:2527468-2535402	110.378	105.75	0.0618019	4.62851	0.194001	4.62892	0.0428378	0.215673	lncRNA:CR44112
2L:2548065-2551384	84.5797	63.6966	0.409095	20.8831	0.657369	20.8871	0.283563	1.0711	CG3515
2L:2557050-2562341	117.984	85.8288	0.459056	32.1551	0.750212	32.1584	0.318194	1.38714	Cyp309a1,lncRNA:CR44113
2L:2588580-2592664	83.7624	120.325	-0.522556	36.5621	0.785481	-36.5659	-0.362208	1.53936	CG15394
2L:2641556-2643285	271.33	413.781	-0.60882	142.451	0.901703	-142.452	-0.422002	2.31976
2L:2706425-2711319	105.32	83.4899	0.335106	21.8301	0.64606	21.8327	0.232278	1.03863	CG31690
2L:2724969-2726063	73.4947	100.918	-0.457471	27.4233	0.722498	-27.4271	-0.317095	1.28193	CG31689
2L:2727553-2734800	76.5249	93.3805	-0.287191	16.8555	0.576617	-16.858	-0.199066	0.859478	CG31689
2L:2737422-2738263	37.2407	61.6723	-0.727743	24.4316	0.714474	-24.4425	-0.504433	1.25342	CG31689,mir-4914
2L:2750204-2752626	309.082	395.262	-0.354821	86.1803	0.771557	-86.181	-0.245943	1.47647	Bacc,Pgk
2L:2753008-2755788	196.63	177.204	0.150075	19.4263	0.460306	19.4269	0.104024	0.616753	Bacc,Pgk
2L:2756859-2758802	204.557	135.313	0.596197	69.2434	0.873184	69.2459	0.413252	2.06502	Bacc,HemK2,Snapin,lncRNA:CR44772
2L:2764331-2767281	85.1447	76.8649	0.147593	8.27988	0.362948	8.28119	0.102304	0.450903	Taf10b,Taf10,Tnpo-SR,Snx21,aph-1
2L:2800644-2801218	152.762	217.89	-0.512308	65.1272	0.843369	-65.1293	-0.355105	1.85386	Syt1
2L:2806530-2806859	41.0159	90.4978	-1.1417	49.4818	0.879911	-49.495	-0.791365	2.11953	daw
2L:2807749-2808502	53.2359	146.774	-1.46313	93.5381	0.969514	-93.5495	-1.01416	3.49049	daw
2L:2820803-2822918	49.07	118.451	-1.27137	69.3807	0.93619	-69.3924	-0.88125	2.75184	CG3123,Duox
2L:2826133-2826592	38.6113	78.8402	-1.02991	40.2289	0.837222	-40.2421	-0.713879	1.81537	CG3123,Duox
2L:2826818-2827521	27.8241	156.179	-2.48879	128.354	0.989495	-128.379	-1.7251	4.55594	Duox
2L:2853294-2855342	183.352	168.703	0.120133	14.6493	0.384896	14.6498	0.08327	0.485963	RpS21,CG3104
2L:2858781-2862781	135.535	108.88	0.315924	26.6548	0.667427	26.6567	0.218982	1.10089	CG2991
2L:2864061-2865126	579.873	527.199	0.137389	52.674	0.46681	52.6742	0.095231	0.628877	CG2991
2L:2883979-2885123	190.822	131.818	0.533688	59.0048	0.842408	59.0072	0.369924	1.84774	NTPase,lilli
2L:2887736-2889370	426.659	257.31	0.729574	169.349	0.931116	169.35	0.505702	2.67533	lilli
2L:2896437-2900739	290.716	275.185	0.0792089	15.531	0.293706	15.5312	0.0549034	0.347724	lilli
2L:2928222-2934395	82.3411	56.6898	0.538523	25.6513	0.72024	25.657	0.373276	1.27382	lilli
2L:2938928-2946320	203.443	157.862	0.36596	45.5808	0.754392	45.5823	0.253664	1.40402	lilli
2L:2955198-2959670	149.654	99.2408	0.592625	50.4131	0.842899	50.4166	0.410776	1.85087	Rbp9,lilli
2L:2959942-2962007	85.1244	49.3945	0.785221	35.7298	0.807429	35.7385	0.544274	1.64729	Rbp9
2L:2989835-2990406	40.1954	62.6185	-0.639557	22.423	0.692057	-22.4322	-0.443307	1.17784	okr,Bem46
2L:2998517-2999301	66.3149	72.8059	-0.134722	6.49099	0.308748	-6.49239	-0.0933823	0.369251	CG3558,Ccdc85
2L:2999310-3002093	130.858	323.72	-1.30674	192.862	0.985919	-192.866	-0.905764	4.26295	CG3558,Ccdc85
2L:3002681-3005270	45.2626	117.545	-1.37683	72.2829	0.942425	-72.296	-0.954344	2.85467	Ccdc85
2L:3009233-3010391	41.029	106.117	-1.37094	65.0884	0.927987	-65.1028	-0.950266	2.63091	Ccdc85
2L:3011264-3012505	48.2038	459.044	-3.25141	410.84	0.999978	-410.853	-2.25371	10.7087	Ccdc85
2L:3015932-3016948	44.7305	82.9921	-0.891716	38.2616	0.824907	-38.272	-0.61809	1.74244	Ccdc85,CG17224
2L:3057884-3059529	291.539	221.294	0.397728	70.2457	0.798467	70.2468	0.275684	1.6018	FASN1
2L:3081511-3084542	48.7018	72.0738	-0.5655	23.372	0.700259	-23.3788	-0.391975	1.20484	toc
2L:3086574-3089560	446.745	331.002	0.432614	115.744	0.828573	115.744	0.299865	1.7636	toc
2L:3095532-3096687	61.2567	103.427	-0.755676	42.1705	0.840038	-42.1772	-0.523794	1.83282	toc
2L:3097355-3099671	67.8695	59.0372	0.20114	8.83233	0.400474	8.83462	0.139419	0.511616	toc
2L:3112699-3114969	120.799	111.073	0.121092	9.72532	0.352644	9.72608	0.0839346	0.434859	toc
2L:3163351-3166818	127.826	90.1775	0.503345	37.6488	0.785839	37.6521	0.348892	1.54103	Hydr2,CR31953,gkt
2L:3279186-3279900	33.6411	66.803	-0.98969	33.162	0.791337	-33.1767	-0.686001	1.56703	OtopLb
2L:3293797-3295098	38.0013	92.3049	-1.28036	54.3036	0.897367	-54.3187	-0.887476	2.2766	CG9664,CG9663
2L:3298609-3301087	96.5082	76.0218	0.344239	20.4865	0.634147	20.4894	0.238609	1.00552	CG9663
2L:3302550-3308462	123.867	86.1559	0.523769	37.711	0.790287	37.7146	0.363049	1.56201	CG9663,CG15406,CG3277
2L:3322408-3324760	75.9591	69.753	0.122969	6.20615	0.294287	6.20737	0.0852354	0.348547	CG8837,CG33281
2L:3342347-3344035	161.37	262.135	-0.699935	100.765	0.91518	-100.767	-0.485158	2.46723	E23
2L:3345596-3346825	52.0029	109.776	-1.0779	57.773	0.906955	-57.7831	-0.747142	2.37468	E23
2L:3348372-3349404	174.494	135.323	0.366771	39.1711	0.740982	39.1728	0.254226	1.35086	E23
2L:3349674-3352755	255.472	296.798	-0.216318	41.3264	0.609427	-41.3269	-0.14994	0.940141	E23
2L:3365647-3367893	108.662	73.4759	0.564506	35.1862	0.7868	35.1908	0.391286	1.54552	GramD1B
2L:3368578-3369824	252.381	148.73	0.762912	103.651	0.927138	103.654	0.52881	2.61919	GramD1B
2L:3417629-3419970	45.64	83.0933	-0.864433	37.4533	0.8197	-37.4633	-0.599179	1.71313	Pgant2,CG31952
2L:3424481-3429358	213.369	230.147	-0.109205	16.7779	0.371664	-16.7782	-0.0756948	0.464681	Pgant2
2L:3475005-3475194	42.2449	85.4702	-1.01664	43.2252	0.853069	-43.2372	-0.704683	1.91779	Pgant4,lncRNA:CR45372
2L:3477114-3477967	38.1657	69.6327	-0.867487	31.4669	0.778709	-31.4789	-0.601296	1.50828	Thor,lncRNA:CR43928
2L:3478667-3479572	33.2224	66.0391	-0.991164	32.8167	0.788767	-32.8316	-0.687023	1.55479	Thor
2L:3481957-3482474	41.9491	192.09	-2.19507	150.141	0.994256	-150.157	-1.52151	5.15959	CG15414
2L:3485441-3487494	45.0225	75.7674	-0.750932	30.7449	0.771736	-30.7541	-0.520506	1.47725	CG15414
2L:3505819-3508531	142.883	125.198	0.190624	17.6851	0.508471	17.6861	0.13213	0.710234	tim,CG31954,lncRNA:CR45299,asRNA:CR45300
2L:3538140-3540412	117.748	138.493	-0.234114	20.7453	0.568414	-20.7466	-0.162275	0.84029	drm,lncRNA:CR44308
2L:3558636-3559297	42.9415	80.8579	-0.913017	37.9164	0.823007	-37.9274	-0.632855	1.73165
2L:3582397-3582774	42.0158	61.3385	-0.545863	19.3227	0.650887	-19.3305	-0.378363	1.05236
2L:3613245-3614612	41.9281	88.2304	-1.07336	46.3023	0.866725	-46.3147	-0.743995	2.01534
2L:3624367-3625978	38.1764	67.2048	-0.815885	29.0284	0.758862	-29.0399	-0.565528	1.42239	for
2L:3628931-3630311	39.3114	142.73	-1.86027	103.418	0.977694	-103.435	-1.28944	3.80291	for
2L:3631145-3632220	35.2152	247.171	-2.81124	211.956	0.998458	-211.974	-1.9486	6.47456	for
2L:3632746-3634713	35.1615	74.5604	-1.08441	39.3989	0.832819	-39.4138	-0.751657	1.78868	for
2L:3640012-3641865	40.5588	88.0762	-1.11874	47.5173	0.871687	-47.5305	-0.775448	2.05328	for
2L:3641956-3642967	39.9997	86.8955	-1.11929	46.8958	0.86934	-46.9092	-0.775834	2.03515	for
2L:3645738-3647048	30.4497	81.0689	-1.41272	50.6192	0.884784	-50.6389	-0.979224	2.16095	for
2L:3654611-3656906	37.679	96.3078	-1.35389	58.6287	0.911716	-58.6444	-0.938445	2.4272	for
2L:3659778-3660123	46.0711	127.26	-1.46584	81.1884	0.957154	-81.2017	-1.01604	3.15015
2L:3712747-3714256	113.969	68.2054	0.740677	45.7631	0.852465	45.7691	0.513398	1.91369	cutlet,CG2818,CG31955
2L:3717519-3720736	111.07	95.6877	0.215064	15.3823	0.518596	15.3838	0.149071	0.731047	Shaw,CG2818,lectin-24A
2L:3720926-3721857	142.31	97.4874	0.545751	44.8228	0.820549	44.8261	0.378286	1.71785	Shaw
2L:3734253-3741787	116.967	106.953	0.129127	10.0142	0.369005	10.015	0.0895037	0.460457	CG10019
2L:3743782-3752127	78.8347	52.6816	0.581532	26.1531	0.72746	26.1596	0.403087	1.29997	CG10019
2L:3776539-3778503	54.496	122.745	-1.17144	68.2487	0.932502	-68.2587	-0.811979	2.69566	bowl
2L:3796541-3797643	41.2771	70.9815	-0.7821	29.7043	0.764003	-29.7146	-0.54211	1.44393	bark
2L:3803072-3807064	163.419	180.002	-0.139441	16.5834	0.430714	-16.584	-0.096653	0.563372	Reph,bark
2L:3814941-3818367	50.2526	86.1879	-0.778288	35.9354	0.808793	-35.9438	-0.539468	1.6544	lncRNA:CR44076,lncRNA:CR44077
2L:3821708-3822668	41.302	62.5773	-0.599428	21.2753	0.677261	-21.2838	-0.415492	1.13091
2L:3824399-3825716	91.0969	308.455	-1.75959	217.358	0.996156	-217.365	-1.21965	5.56117	slp1
2L:3831449-3832522	45.8071	102.344	-1.15978	56.5368	0.905212	-56.5487	-0.8039	2.35611
2L:3834494-3836209	64.6968	203.012	-1.6498	138.315	0.989696	-138.325	-1.14355	4.57527	slp2
2L:3843490-3844052	40.9736	94.942	-1.21235	53.9684	0.896294	-53.982	-0.840338	2.2662
2L:3860919-3861985	239.95	304.233	-0.342443	64.2831	0.754906	-64.284	-0.237363	1.40611	TTLL4B,lncRNA:CR44078
2L:3887273-3887606	41.9745	92.0525	-1.13294	50.078	0.882147	-50.0908	-0.785297	2.13831	capu
2L:3897688-3903331	73.6796	77.9777	-0.0817966	4.29812	0.211434	-4.29889	-0.0566971	0.23754	capu,fred
2L:4029579-4034437	86.4254	95.1114	-0.138163	8.68601	0.361741	-8.68711	-0.0957673	0.449011	ed
2L:4044518-4047290	79.7178	72.3917	0.139078	7.32612	0.334853	7.32744	0.0964014	0.407747	ed
2L:4107754-4113881	96.9503	75.7346	0.356293	21.2157	0.648049	21.2187	0.246963	1.04426	ed
2L:4132719-4133252	267.45	263.678	0.0204933	3.77224	0.090139	3.7723	0.0142049	0.0944635
2L:4143025-4150240	108.244	81.3934	0.411303	26.8506	0.706383	26.8537	0.285093	1.22548	CG2955
2L:4166464-4170138	92.7007	103.932	-0.164987	11.2312	0.418555	-11.2325	-0.11436	0.542239	Or24a
2L:4172234-4175384	94.1327	53.1909	0.823517	40.9418	0.837312	40.9501	0.570818	1.81592
2L:4196121-4199416	115.548	99.5253	0.215363	16.0232	0.525189	16.0247	0.149279	0.744838	ft,Naprt
2L:4220478-4223455	35.1741	94.3231	-1.4231	59.1489	0.913281	-59.1661	-0.986415	2.44508	ft
2L:4224654-4225475	122.841	101.488	0.275482	21.353	0.61164	21.3548	0.19095	0.945823	CG3702
2L:4233398-4247259	136.278	103.869	0.391788	32.409	0.728197	32.4114	0.271566	1.30268	lncRNA:CR44058,lncRNA:CR44059,lncRNA:CR45720
2L:4249902-4251993	248.808	246.835	0.0114857	1.97296	0.0541549	1.973	0.00796127	0.0556765	lncRNA:CR44059
2L:4255971-4257860	108.855	50.5636	1.10623	58.291	0.909101	58.3015	0.766781	2.39801	CG15425,lncRNA:CR45294,lncRNA:CR45295,lncRNA:CR45296
2L:4257882-4262938	81.7779	65.5011	0.320192	16.2768	0.580126	16.2799	0.22194	0.867801	lncRNA:CR44080,CG15425,lncRNA:CR45296
2L:4275446-4278405	77.1204	66.9226	0.204618	10.1978	0.430088	10.1998	0.141831	0.562273	Art2
2L:4285461-4286760	270.743	155.028	0.8044	115.716	0.937039	115.718	0.557568	2.76524	tutl
2L:4286784-4292527	91.7556	69.0749	0.409633	22.6806	0.675428	22.6843	0.283936	1.12525	tutl
2L:4305661-4306814	360.996	287.257	0.329639	73.7386	0.752738	73.7394	0.228488	1.39731	tutl
2L:4321546-4322685	60.9731	42.3262	0.526622	18.6469	0.640852	18.6543	0.365026	1.02402	tutl
2L:4323767-4324691	54.1916	168.953	-1.64048	114.761	0.983304	-114.773	-1.13709	4.0926	tutl,bdl
2L:4326091-4328010	219.529	241.112	-0.135292	21.583	0.446203	-21.5834	-0.0937773	0.590956	bdl
2L:4334020-4336936	220.061	170.822	0.365405	49.2384	0.760046	49.2398	0.25328	1.42731	Atet
2L:4346448-4348128	145.822	89.6693	0.70152	56.1525	0.875151	56.1568	0.486257	2.08065	Atet,lncRNA:CR44697,lncRNA:CR44698
2L:4354064-4355538	38.0181	82.2549	-1.11342	44.2368	0.857382	-44.2508	-0.771761	1.94759	CG15429
2L:4361851-4363017	38.7265	86.1084	-1.15283	47.3819	0.871262	-47.396	-0.799084	2.04998	Traf4,lncRNA:CR45363
2L:4364039-4365535	42.1099	88.0263	-1.06377	45.9164	0.865205	-45.9287	-0.737352	2.004	Traf4,lncRNA:CR45363
2L:4365860-4366952	47.9015	79.4223	-0.729473	31.5208	0.777524	-31.5292	-0.505632	1.50294	Traf4,lncRNA:CR45363
2L:4368900-4370297	48.92	93.2895	-0.93129	44.3695	0.856354	-44.3792	-0.645521	1.9404	Traf4,lncRNA:CR45363
2L:4371392-4372604	313.034	368.239	-0.23432	55.2042	0.63294	-55.2047	-0.162418	1.00223	Traf4,lncRNA:CR45363
2L:4374512-4376055	120.662	114.728	0.0727441	5.93321	0.229315	5.93365	0.0504224	0.260475	Traf4
2L:4376293-4378864	105.05	95.873	0.131878	9.17688	0.358925	9.17782	0.0914108	0.444608	Traf4
2L:4395033-4396863	40.3585	62.0777	-0.621201	21.7191	0.683094	-21.728	-0.430584	1.14915	l(2)k05819
2L:4413626-4418664	91.5915	165.378	-0.852477	73.786	0.921371	-73.7909	-0.590892	2.54302	CG15431,tRNA:Trp-CCA-2-1
2L:4422415-4424571	230.098	136.208	0.756434	93.8896	0.92383	93.8926	0.52432	2.57479	CG15431
2L:4427123-4428542	135.384	104.824	0.369087	30.5599	0.711278	30.5622	0.255832	1.24229	CG15431
2L:4430368-4434178	87.1087	59.5684	0.548269	27.5403	0.736601	27.5457	0.380031	1.33409	CG15431,CG34177,CG34178
2L:4440192-4443065	74.3568	54.7936	0.440456	19.5632	0.646618	19.5681	0.305301	1.04021	morgue,CG15431,CG15432,Sfp24F
2L:4472886-4473364	38.3409	100.387	-1.38862	62.0463	0.920477	-62.0618	-0.962518	2.53171	ine
2L:4566322-4568037	115.305	113.636	0.0210343	1.66893	0.0755219	1.66907	0.0145799	0.0785259	dpy
2L:4569639-4574353	40.9517	99.015	-1.27372	58.0633	0.910196	-58.0772	-0.882878	2.41013	dpy
2L:4586063-4587835	40.1603	102.348	-1.34964	62.188	0.920857	-62.2026	-0.935503	2.5365	dpy
2L:4588518-4592041	34.5509	107.762	-1.64105	73.2109	0.944638	-73.2292	-1.13749	2.89386	dpy
2L:4594913-4595939	40.189	128.618	-1.67822	88.4294	0.966072	-88.4453	-1.16326	3.38352	dpy
2L:4597873-4601866	38.4608	78.6475	-1.03201	40.1866	0.837088	-40.1999	-0.715335	1.81455	dpy
2L:4618987-4621850	30.6882	58.3372	-0.926734	27.649	0.74677	-27.6646	-0.642363	1.37346	lncRNA:CR44609
2L:4660058-4660361	47.5494	94.1788	-0.985977	46.6295	0.867172	-46.6399	-0.683427	2.0187
2L:4699639-4702348	78.9513	60.1217	0.393078	18.8296	0.630504	18.8337	0.272461	0.995615	Taf12L,dcma
2L:4707453-4708043	77.714	191.287	-1.2995	113.573	0.976085	-113.581	-0.900742	3.73325	dcma
2L:4719186-4724194	84.5476	59.412	0.50901	25.1356	0.712373	25.1408	0.352819	1.24609	dcma
2L:4746452-4749026	198.194	365.94	-0.884695	167.746	0.954584	-167.749	-0.613224	3.09189	fipi
2L:4756272-4763048	94.6761	77.5868	0.287188	17.0893	0.57912	17.0917	0.199064	0.865408	fipi,CG42523
2L:4764387-4766867	221.942	196.007	0.179274	25.9345	0.526955	25.9351	0.124263	0.748564	fipi,CG42523
2L:4770395-4772881	162.348	127.058	0.353602	35.2899	0.717693	35.2917	0.245098	1.26476	fipi
2L:4780192-4783467	148.885	141.834	0.0699956	7.05108	0.239663	7.05143	0.0485173	0.273993	fipi
2L:4798221-4800726	47.3554	88.5986	-0.903753	41.2431	0.840977	-41.253	-0.626434	1.83871	slf
2L:4805244-4807678	43.0121	139.649	-1.69899	96.6368	0.97347	-96.6518	-1.17765	3.62948
2L:4809248-4812546	129.822	111.989	0.213173	17.8326	0.530844	17.8339	0.14776	0.756819	CG15629,lncRNA:CR45297
2L:4823707-4826335	150.791	75.0069	1.00746	75.7843	0.937397	75.791	0.698316	2.77094	CG15628
2L:4837873-4839768	295.397	133.197	1.14909	162.2	0.977136	162.204	0.796491	3.77817	tank,CG12194
2L:4846245-4847300	196.133	92.8321	1.07913	103.3	0.960999	103.306	0.747998	3.24416	mxt,CG11927
2L:4859798-4861194	467.33	506.726	-0.116764	39.3959	0.416454	-39.396	-0.0809344	0.538633	smog
2L:4877154-4878077	51.8436	84.2646	-0.70076	32.421	0.782754	-32.4286	-0.48573	1.52673	Cf2,smog
2L:4885803-4887491	53.2283	78.4317	-0.559243	25.2034	0.717603	-25.2096	-0.387638	1.26444	CG3008
2L:4889004-4890143	46.2914	84.0631	-0.860729	37.7717	0.821666	-37.7815	-0.596612	1.7241	CG15625
2L:4949488-4950000	80.5478	94.1359	-0.224901	13.5882	0.497519	-13.59	-0.15589	0.688198	jet,Jon25Biii
2L:4976132-4978215	67.4645	44.3296	0.605856	23.1348	0.699052	23.1428	0.419948	1.20082	mRpL28,Gmd,CG3792,CG8891
2L:4984069-4985243	111.383	84.7598	0.394073	26.6229	0.698449	26.6258	0.273151	1.19882	CG34126
2L:4994931-5000716	108.004	79.5009	0.442036	28.5027	0.725314	28.5061	0.306396	1.29213	Rtnl1
2L:5001100-5005181	227.481	190.313	0.257375	37.1684	0.652832	37.1693	0.178399	1.05795	Rtnl1
2L:5036839-5039419	136.436	153.753	-0.172392	17.3172	0.481159	-17.3181	-0.119493	0.656157	Col4a1,CG14042,SP555
2L:5041764-5046989	110.606	75.7492	0.546127	34.8568	0.783403	34.8611	0.378547	1.52972	CG31650,CG9121,CG33995,CG14042,SP555,CG44000,CG44001
2L:5049815-5051713	128.305	78.7796	0.703678	49.525	0.859148	49.53	0.487753	1.96005	eIF3h,CG9121
2L:5062144-5066833	273.113	240.215	0.185174	32.8983	0.555071	32.8988	0.128353	0.809841	qtc,asRNA:CR43820
2L:5079443-5084349	98.2585	82.9702	0.243989	15.2883	0.531894	15.2903	0.16912	0.75906	Pgant5
2L:5095825-5097711	213.667	117.397	0.863975	96.2707	0.939185	96.2746	0.598862	2.79991	CG5828,CG4230
2L:5104925-5110013	79.862	106.256	-0.411961	26.3938	0.703724	-26.397	-0.285549	1.21646	Msp300
2L:5110148-5113439	89.7149	94.6686	-0.0775373	4.95363	0.227884	-4.95424	-0.0537448	0.258621	Msp300
2L:5128373-5129522	42.4323	57.8425	-0.446966	15.4102	0.584462	-15.4166	-0.309813	0.878181	Msp300
2L:5186140-5187608	60.0335	54.7538	0.132809	5.2797	0.274686	5.28137	0.0920561	0.321151	snoRNA:Psi28S-2263,Msp300
2L:5196015-5197768	129.385	105.618	0.292817	23.7671	0.633029	23.7689	0.202965	1.00247	sncRNA:128,Msp300
2L:5217408-5218421	99.331	77.6511	0.355237	21.6798	0.652117	21.6827	0.246231	1.05589	tkv,TpnC25D,CG14034
2L:5219735-5220802	108.282	83.7141	0.371257	24.5683	0.678088	24.5711	0.257336	1.13348	tkv,TpnC25D
2L:5221819-5223172	104.559	118.011	-0.1746	13.4517	0.453332	-13.4528	-0.121023	0.603914	tkv
2L:5224644-5227478	218.13	204.006	0.0965801	14.1245	0.340508	14.1249	0.0669442	0.416285	tkv
2L:5230703-5233089	75.3183	61.2162	0.299085	14.102	0.540275	14.1052	0.20731	0.777128	tkv
2L:5236886-5240642	123.934	152.119	-0.295626	28.1847	0.661615	-28.1862	-0.204912	1.08357	tkv,tRNA:Asp-GTC-1-1,tRNA:Asp-GTC-2-1
2L:5247639-5249156	44.1318	109.499	-1.31103	65.3672	0.928345	-65.3804	-0.908735	2.63589	tkv
2L:5258524-5260217	96.9078	116.552	-0.266284	19.6438	0.593089	-19.6456	-0.184574	0.899161	tkv,lncRNA:CR44744
2L:5260321-5262775	63.0393	74.7484	-0.245791	11.7091	0.482142	-11.7117	-0.17037	0.658054	tkv,lncRNA:CR44744
2L:5277402-5278047	101.882	83.4043	0.2887	18.4773	0.593983	18.4795	0.200111	0.901361	Nin,Bub1
2L:5283073-5289470	134.963	114.43	0.238107	20.5337	0.576304	20.5351	0.165043	0.858739	vri,Bub1,lncRNA:CR44742,lncRNA:CR44743
2L:5304682-5307057	329.528	285.151	0.208673	44.3767	0.596688	44.3772	0.144641	0.908044	vri
2L:5332351-5334369	113.132	98.7748	0.19579	14.357	0.490903	14.3583	0.135711	0.675117	fusl
2L:5358251-5359006	39.8042	67.8098	-0.768574	28.0056	0.749855	-28.0162	-0.532735	1.38571	nompC
2L:5372204-5372385	41.4675	79.1003	-0.9317	37.6328	0.821599	-37.6443	-0.645806	1.72372
2L:5427749-5428474	43.2389	65.7374	-0.604386	22.4985	0.691945	-22.5066	-0.418928	1.17748
2L:5436401-5437590	42.2659	61.5005	-0.541104	19.2346	0.649367	-19.2422	-0.375065	1.04802	lncRNA:CR31647,snoRNA:Me28S-A2486
2L:5437974-5438457	45.1105	95.8136	-1.08677	50.7031	0.884203	-50.7148	-0.75329	2.15591	lncRNA:CR31647,snoRNA:Me28S-A2486
2L:5478373-5480434	75.5606	78.1978	-0.0494955	2.63729	0.137544	-2.63775	-0.0343076	0.147971
2L:5482091-5483630	39.2284	71.573	-0.86752	32.3447	0.7849	-32.3563	-0.601319	1.53665
2L:5505181-5505984	31.1905	59.0726	-0.921381	27.8821	0.749296	-27.8973	-0.638653	1.38348
2L:5519598-5521255	76.7081	48.1341	0.67232	28.574	0.752827	28.5819	0.466017	1.39767	cl,CG14020,CG7382,Vps52
2L:5527056-5527425	54.5496	65.0312	-0.253562	10.4816	0.456372	-10.4846	-0.175756	0.60949	Cox11,CG31915,Cap-D3,asRNA:CR44793
2L:5545471-5548130	123.098	66.9486	0.878686	56.1497	0.894439	56.1566	0.609058	2.24847	Lam,Oscillin
2L:5593580-5595647	267.795	309.964	-0.210972	42.169	0.595123	-42.1695	-0.146234	0.904172
2L:5683045-5686569	123.553	98.64	0.324884	24.9128	0.658039	24.915	0.225192	1.07306
2L:5744046-5746014	43.8321	110.328	-1.33174	66.4962	0.930915	-66.5096	-0.923095	2.67242	CG11029,CG11030
2L:5764403-5766807	38.2211	83.6721	-1.13038	45.4511	0.862881	-45.4651	-0.783519	1.9869	obst-E,CG9171
2L:5771117-5774824	91.3042	51.111	0.837046	40.1931	0.834943	40.2019	0.580196	1.80146	CG9171,asRNA:CR31912
2L:5782144-5783593	358.025	354.379	0.0147672	3.64599	0.0573063	3.64602	0.0102358	0.0590139	CG9171,CG31913
2L:5793562-5796341	124.088	115.325	0.105662	8.76331	0.327612	8.76395	0.0732395	0.396919	CG9171
2L:5804362-5805452	78.1303	103.754	-0.409211	25.6235	0.698784	-25.6268	-0.283643	1.19993	CG7239,CG11034
2L:5813147-5816678	140.807	126.187	0.158156	14.62	0.451008	14.6209	0.109625	0.599671
2L:5871364-5872969	454.015	474.27	-0.0629693	20.2552	0.23754	-20.2553	-0.043647	0.271205	rau
2L:5878655-5882093	63.4117	82.4619	-0.378979	19.0502	0.631241	-19.054	-0.262688	0.997613	rau
2L:5893455-5895896	57.9598	75.3803	-0.379135	17.4205	0.60936	-17.4246	-0.262796	0.93997	Acp26Aa,Acp26Ab
2L:5896795-5899755	102.54	111.357	-0.119004	8.81691	0.341447	-8.81771	-0.0824876	0.41771	lncRNA:CR44579
2L:5901303-5903361	51.9772	108.543	-1.06231	56.5655	0.903335	-56.5755	-0.736338	2.3365	CG9021,lncRNA:CR44579
2L:5943055-5945573	148.794	152.26	-0.0332218	3.46611	0.118144	-3.46627	-0.0230276	0.125727	Gpdh1,Sfp26Ad,lncRNA:CR45289
2L:5946179-5946673	37.5456	60.7266	-0.693684	23.181	0.701064	-23.1914	-0.480825	1.20753	Gpdh1,lncRNA:CR44986
2L:5978138-5981056	144.06	99.392	0.535472	44.6684	0.817621	44.6717	0.371161	1.70167	chic,eIF4A
2L:5981210-5983290	82.8633	96.5837	-0.221047	13.7204	0.499486	-13.7222	-0.153218	0.69212	chic,eIF4A
2L:5986765-5989182	152.824	90.565	0.754846	62.2591	0.893054	62.2637	0.52322	2.23543	ifc,eIF4A,Kdm5
2L:5997096-5999495	255.471	191.122	0.418667	64.3491	0.804077	64.3505	0.290198	1.63003	Kdm5,Tsp26A
2L:6000103-6000700	147.513	58.4959	1.33444	89.0176	0.96339	89.0276	0.924964	3.30744	Kdm5,Tsp26A
2L:6019329-6019788	42.7918	69.1822	-0.693066	26.3904	0.73336	-26.3995	-0.480397	1.32186	H2.0
2L:6053555-6056933	212.972	162.364	0.391428	50.6075	0.773412	50.609	0.271317	1.48462	CG9135,CG13995
2L:6062210-6063624	126.116	50.895	1.30916	75.2214	0.946605	75.2328	0.907441	2.93004	ND-51,CG13994,Fbw5
2L:6098103-6100979	82.9885	78.2885	0.0841099	4.69993	0.221984	4.70069	0.0583005	0.251008	CG9175,stai
2L:6106439-6107325	750.932	813.335	-0.115168	62.4031	0.417818	-62.4032	-0.0798281	0.540972	stai
2L:6110301-6112973	162.211	141.439	0.197687	20.7716	0.536208	20.7725	0.137026	0.768318	stai
2L:6178335-6181359	250.075	136.736	0.870965	113.339	0.946381	113.342	0.603707	2.92586	smal
2L:6188211-6189420	491.918	432.047	0.187227	59.8702	0.570918	59.8705	0.129776	0.846107	smal
2L:6193023-6194478	172.342	125.882	0.45321	46.4608	0.794086	46.463	0.314141	1.5803	smal
2L:6198821-6200944	119.613	64.2471	0.896668	55.3657	0.893054	55.373	0.621523	2.23543	smal
2L:6204643-6206486	165.587	204.081	-0.301545	38.4931	0.691252	-38.4943	-0.209015	1.17523	smal
2L:6212852-6213799	115.817	79.982	0.534106	35.8355	0.784833	35.8395	0.370214	1.53634
2L:6235693-6240762	71.4249	50.5861	0.497687	20.8388	0.667628	20.8448	0.34497	1.1015
2L:6242965-6243879	434.783	618.887	-0.50938	184.104	0.870211	-184.104	-0.353075	2.04185
2L:6250842-6255885	177.307	118.682	0.579155	58.6257	0.855773	58.6286	0.40144	1.93637	AANATL2,Ddr
2L:6276578-6282314	99.7061	62.4812	0.674258	37.2248	0.810223	37.2309	0.46736	1.66191	Ddr
2L:6296534-6299796	112.154	87.0769	0.36512	25.0771	0.681776	25.0798	0.253082	1.145	Ddr
2L:6323631-6325962	210.144	175.161	0.262693	34.9825	0.648518	34.9835	0.182085	1.0456	Ddr,PDZ-GEF
2L:6419112-6419557	41.8995	64.0026	-0.611197	22.1031	0.687698	-22.1116	-0.42365	1.16379	Tig
2L:6419599-6419992	41.8991	74.5151	-0.830616	32.6161	0.787001	-32.6267	-0.575739	1.54647	Tig
2L:6460147-6462335	41.5253	68.5146	-0.722419	26.9892	0.739104	-26.9989	-0.500743	1.34363	Rchy1
2L:6464206-6465567	63.3218	66.7477	-0.0760157	3.42589	0.185352	-3.42674	-0.0526901	0.204999	Rchy1,HemK1
2L:6470249-6472342	52.1396	71.3565	-0.452665	19.2169	0.643556	-19.2222	-0.313763	1.03158	mmy
2L:6514590-6517977	89.1646	81.7753	0.124806	7.3893	0.319364	7.39035	0.0865089	0.384728	CG31637
2L:6525403-6526035	35.9905	58.0931	-0.690752	22.1026	0.68895	-22.1134	-0.478793	1.1678	CG31637
2L:6527793-6528800	44.8693	85.3505	-0.927672	40.4812	0.837826	-40.4919	-0.643013	1.81908	eya,CG31637
2L:6534245-6536090	49.8936	100.837	-1.01509	50.9429	0.883599	-50.9531	-0.703608	2.15072	eya
2L:6536893-6538198	42.5534	121.575	-1.51451	79.0221	0.954316	-79.0366	-1.04978	3.086	eya
2L:6539255-6541399	43.9232	64.6876	-0.558504	20.7643	0.669863	-20.7719	-0.387126	1.10825	eya
2L:6546133-6548434	63.2378	145.949	-1.2066	82.711	0.954271	-82.7198	-0.836353	3.08503	eya
2L:6549122-6551422	43.491	91.1444	-1.06744	47.6533	0.871999	-47.6653	-0.73989	2.05572	lncRNA:CR44776
2L:6581819-6584929	185.937	213.66	-0.200503	27.7231	0.560279	-27.7238	-0.138978	0.821615	Dpp10
2L:6612269-6613482	338.427	317.507	0.0920594	20.9207	0.328148	20.9209	0.0638107	0.397717	CG11050
2L:6614786-6615486	734.476	699.203	0.0710034	35.2727	0.271825	35.2728	0.0492158	0.317214	CG11050
2L:6629368-6630781	328.156	295.314	0.152129	32.8414	0.483818	32.8418	0.105448	0.661297	Oatp26F
2L:6644135-6648484	96.0234	82.8057	0.213655	13.2176	0.485629	13.2194	0.148094	0.66481	CG31635,Tango1
2L:6703825-6704694	98.4909	139.287	-0.500003	40.7965	0.796254	-40.7996	-0.346575	1.59088	Tsp
2L:6707025-6708550	92.9464	102.907	-0.146865	9.96021	0.391355	-9.96129	-0.101799	0.49652	Tsp
2L:6722254-6723749	167.966	117.973	0.509719	49.9937	0.82151	49.9963	0.353311	1.72322	homer,Liprin-alpha
2L:6743175-6744967	84.066	93.9087	-0.159736	9.8427	0.398619	-9.844	-0.110721	0.508526	meng,CG31910,snoRNA:Me28S-G2743
2L:6773442-6775786	162.043	85.3968	0.924126	76.6465	0.931653	76.6521	0.640555	2.68315	LUBEL,CG17378
2L:6786332-6789266	87.0706	128.744	-0.564246	41.6732	0.813263	-41.6771	-0.391105	1.67805	nrv1,nrv2
2L:6791753-6793241	38.5238	77.4151	-1.00687	38.8913	0.829489	-38.9043	-0.697906	1.76896	nrv2
2L:6795486-6796541	486.976	377.678	0.366692	109.298	0.791158	109.298	0.254172	1.56618	nrv2
2L:6868339-6869326	110.418	45.1519	1.29012	65.2663	0.927987	65.2791	0.894243	2.63091	Nha1
2L:6988787-6990779	46.595	166.986	-1.84148	120.391	0.986411	-120.405	-1.27642	4.29849	uif
2L:7000350-7004063	42.9388	89.9578	-1.06697	47.019	0.869586	-47.0311	-0.739565	2.03704	uif
2L:7005973-7007042	28.725	85.9739	-1.58159	57.2489	0.907939	-57.2707	-1.09628	2.3853	uif
2L:7008803-7011114	41.9011	110.889	-1.40406	68.9881	0.936726	-69.0024	-0.97322	2.76028	uif
2L:7019786-7020711	46.2215	88.045	-0.929677	41.8235	0.844598	-41.8339	-0.644403	1.86174	Gart,Pcp
2L:7021271-7022143	33.0143	96.0091	-1.54008	62.9948	0.923562	-63.0136	-1.0675	2.57127	Gart,Pcp
2L:7022418-7023544	36.7339	83.0579	-1.177	46.3239	0.867239	-46.3389	-0.815837	2.0192	Gart,Pcp
2L:7023860-7025385	61.8685	61.3081	0.0131267	0.560374	0.0346431	0.560528	0.00909877	0.0352574	Gart,CG31908
2L:7050508-7052011	87.1755	160.698	-0.882358	73.5226	0.924299	-73.5279	-0.611604	2.58097	milt
2L:7079594-7081813	51.1177	66.638	-0.382523	15.5203	0.580819	-15.525	-0.265144	0.869452	Pvf2,lncRNA:CR44611
2L:7092076-7093671	73.7773	59.9333	0.299819	13.844	0.535984	13.8472	0.207819	0.767836	lncRNA:CR46196
2L:7096398-7098148	138.901	111.175	0.321233	27.7267	0.673394	27.7286	0.222662	1.119	Pvf3
2L:7123402-7123843	313.733	291.151	0.107772	22.5826	0.382594	22.5828	0.0747021	0.482228	Pvf3
2L:7136633-7138515	185.65	179.803	0.0461694	5.84714	0.185687	5.84732	0.0320022	0.20541	Pvf3
2L:7139346-7142478	204.194	237.933	-0.220616	33.7391	0.598967	-33.7398	-0.152919	0.913713	Pvf3,lncRNA:CR44612
2L:7156673-7158383	89.8333	60.8411	0.562203	28.9922	0.749385	28.9976	0.38969	1.38384	Pvf3
2L:7159951-7163302	84.9134	185.39	-1.1265	100.476	0.96301	-100.483	-0.780828	3.29711
2L:7181116-7182867	138.101	52.4495	1.39672	85.6514	0.9612	85.6628	0.968133	3.24933	MICU1
2L:7187970-7190432	106.196	109.504	-0.0442578	3.30827	0.137656	-3.30856	-0.0306772	0.148101	CG4496,CG4497
2L:7208277-7212149	199.256	142.469	0.483974	56.7868	0.822739	56.7889	0.335465	1.73013	CG13784
2L:7218361-7220597	144.373	82.1794	0.812956	62.194	0.900072	62.1993	0.563498	2.3033	CG13784,mEFG1,asRNA:CR44989
2L:7244589-7249945	311.288	265.162	0.231377	46.1262	0.627509	46.1268	0.160378	0.987542	CG13786,Ndae1
2L:7264931-7266501	159.34	127.311	0.323752	32.029	0.689844	32.0306	0.224408	1.17068	Wnt4
2L:7290960-7291549	288.675	304.086	-0.0750338	15.4111	0.293617	-15.4113	-0.0520095	0.347597
2L:7316413-7317172	44.6831	70.6558	-0.661078	25.9727	0.729002	-25.9811	-0.458225	1.30564	wg
2L:7324679-7325571	42.5234	101.353	-1.25306	58.8294	0.912096	-58.8427	-0.868553	2.43151
2L:7333802-7334024	42.3706	61.5221	-0.538041	19.1515	0.648339	-19.159	-0.372941	1.04509	Wnt6
2L:7340195-7340835	55.0243	80.5933	-0.550592	25.569	0.720464	-25.575	-0.381641	1.27462	Wnt6
2L:7355364-7355665	45.1145	105.113	-1.22028	59.9988	0.914733	-60.0112	-0.845834	2.46197
2L:7368681-7370021	38.6038	80.3578	-1.05769	41.754	0.845112	-41.7674	-0.733138	1.86505	Wnt10,asRNA:CR44063
2L:7373044-7373605	42.1041	93.9899	-1.15854	51.8858	0.888829	-51.8987	-0.803042	2.19669	Wnt10
2L:7373799-7373849	42.2449	63.3458	-0.584471	21.1009	0.674735	-21.1089	-0.405124	1.12312	Wnt10
2L:7392166-7399364	93.4621	76.9986	0.27955	16.4635	0.567476	16.4659	0.193769	0.838117	CG5160,CR44079
2L:7418935-7423785	117.067	127.869	-0.127328	10.8017	0.377207	-10.8024	-0.0882572	0.473541	chm,lncRNA:CR43857
2L:7435942-7439761	89.9781	107.363	-0.254857	17.3853	0.560659	-17.3872	-0.176653	0.822479	CG5973
2L:7483553-7486272	106.431	64.0623	0.732371	42.3687	0.839033	42.375	0.507641	1.82655	Ziz
2L:7494524-7496967	173.064	111.165	0.638608	61.8994	0.873408	61.9027	0.442649	2.06678	Obp28a,Ziz,RapGAP1
2L:7501800-7508800	143.197	101.838	0.491731	41.3595	0.794868	41.3624	0.340842	1.5841	RapGAP1
2L:7509796-7518456	130.4	100.321	0.378331	30.0799	0.713848	30.0822	0.262239	1.25123	RapGAP1
2L:7520885-7523974	201.179	179.423	0.165114	21.7559	0.499933	21.7565	0.114448	0.693013	lncRNA:CR44082,RapGAP1
2L:7526349-7532782	158.577	113.77	0.479069	44.8075	0.800992	44.8101	0.332066	1.61441	RapGAP1
2L:7544249-7545026	32.3642	104.978	-1.69762	72.6142	0.943811	-72.634	-1.1767	2.87904	RapGAP1
2L:7551117-7557335	102.053	79.819	0.354515	22.234	0.652809	22.2368	0.245731	1.05788	RapGAP1
2L:7560996-7576760	81.3337	62.8828	0.371188	18.4509	0.621452	18.4546	0.257288	0.971412	RapGAP1,lncRNA:CR46063
2L:7585223-7589445	75.9225	112.481	-0.567077	36.5581	0.795517	-36.5625	-0.393068	1.58727
2L:7591241-7594199	195.852	111.745	0.809553	84.1072	0.926199	84.1111	0.56114	2.60638
2L:7607416-7609170	39.4821	128.695	-1.70468	89.2127	0.966966	-89.229	-1.1816	3.41022	Cyp4d21,CG6739
2L:7609338-7609871	42.5212	73.7824	-0.795093	31.2612	0.776608	-31.2713	-0.551116	1.49883	CG6739
2L:7610070-7613536	50.714	98.1926	-0.953231	47.4786	0.869474	-47.4882	-0.660729	2.03618	CG6739
2L:7618758-7619932	40.2011	167.945	-2.06268	127.743	0.989138	-127.76	-1.42974	4.52246
2L:7621144-7625406	95.8842	61.3578	0.644046	34.5264	0.792566	34.5324	0.446418	1.57294
2L:7627243-7629405	122.246	91.1755	0.423072	31.0708	0.732935	31.0737	0.293251	1.32027
2L:7641948-7642628	154.474	81.7774	0.91759	72.6966	0.926512	72.7024	0.636025	2.61063	Slob
2L:7648758-7651412	234.682	204.927	0.195595	29.7547	0.564369	29.7553	0.135576	0.83096	Slob
2L:7655185-7656331	124.056	72.0391	0.784136	52.0166	0.87457	52.0225	0.543521	2.07601	Slob
2L:7660599-7662368	85.1237	46.6338	0.868186	38.4899	0.826137	38.4997	0.601781	1.74948	Slob
2L:7666945-7673054	157.991	95.0474	0.733121	62.9434	0.891489	62.9476	0.508161	2.2209	Myo28B1,Slob
2L:7701981-7702841	61.5374	130.843	-1.0883	69.3056	0.931876	-69.3141	-0.754352	2.68643	Tep3,Tep2
2L:7724631-7726588	40.9288	69.2282	-0.758245	28.2994	0.75247	-28.3096	-0.525575	1.39622	CG13795,CG13796,asRNA:CR46074
2L:7741299-7742300	38.0706	108.797	-1.51489	70.7263	0.940414	-70.7425	-1.05004	2.82033	Acp1
2L:7743117-7744019	44.6682	72.2902	-0.694553	27.622	0.744893	-27.6308	-0.481427	1.36607	CG7214
2L:7745055-7747023	44.5246	69.5011	-0.642432	24.9765	0.718385	-24.9847	-0.4453	1.26722	CG7214,ATPsynGL
2L:7748201-7750604	45.4343	92.6063	-1.02733	47.1721	0.869742	-47.1833	-0.712091	2.03824	ATPsynGL
2L:7751608-7752316	42.4361	84.4251	-0.992378	41.9889	0.84585	-42.0007	-0.687864	1.86983	CG7203,lncRNA:CR45718
2L:7773466-7775705	146.109	111.924	0.384524	34.1849	0.730812	34.1871	0.266531	1.31235	CG7179,CG7191
2L:7789377-7790281	165.238	115.303	0.519107	49.9342	0.824147	49.9369	0.359817	1.73811	CG7149,LKRSDH
2L:7799369-7801087	165.771	174.342	-0.072731	8.57131	0.249452	-8.57162	-0.0504133	0.286952	Herp,r2d2,Cdc14
2L:7807021-7810605	300.461	244.077	0.299843	56.3842	0.714519	56.385	0.207835	1.25358	Cdc14,LanB1
2L:7811723-7814231	128.743	87.7807	0.552515	40.962	0.808681	40.9657	0.382974	1.65381	LanB1
2L:7827089-7830726	114.199	64.915	0.814924	49.2838	0.869429	49.2906	0.564862	2.03584	mts,Rack1
2L:7833596-7838858	116.226	74.0266	0.650821	42.1997	0.82978	42.2047	0.451115	1.77066	mts,CR43100
2L:7859909-7860676	43.7047	84.9643	-0.959069	41.2596	0.841804	-41.2707	-0.664776	1.84392	TwdlE,lectin-28C
2L:7876048-7877892	37.2904	94.4163	-1.34023	57.1258	0.907537	-57.1416	-0.928977	2.38094	spz3
2L:7878781-7879985	41.8497	82.5186	-0.979502	40.6689	0.838854	-40.6807	-0.678939	1.82544	spz3
2L:7880935-7882531	41.9753	133.461	-1.66881	91.4861	0.969268	-91.5013	-1.15673	3.48246	CG7102
2L:7911963-7915339	132.463	91.0905	0.540214	41.3723	0.807742	41.3758	0.374448	1.64892	Snoo
2L:7920718-7922148	53.8113	77.9097	-0.533893	24.0983	0.704953	-24.1043	-0.370066	1.22062	Snoo
2L:7922196-7924245	196.411	150.522	0.383898	45.8887	0.761008	45.8903	0.266098	1.43132	Snoo
2L:7924444-7927044	254.534	337.712	-0.407934	83.1779	0.810782	-83.1789	-0.282758	1.66485	Snoo
2L:7939487-7947466	94.9277	75.245	0.335233	19.6827	0.626838	19.6855	0.232366	0.985743	Snoo
2L:7954076-7955667	68.2409	50.6708	0.429483	17.5701	0.618256	17.5754	0.297695	0.963004	Snoo
2L:7968843-7970488	149.459	123.201	0.27874	26.2584	0.638528	26.2599	0.193208	1.01757	Snoo
2L:7972501-7975613	107.792	81.6588	0.400565	26.1329	0.698985	26.1359	0.277651	1.2006	Snoo
2L:7984740-7985981	86.7393	57.5132	0.592794	29.2262	0.753475	29.2322	0.410893	1.40029	CG7231,pes,Snoo
2L:7991556-7994001	69.0053	120.002	-0.798283	50.997	0.873408	-51.0033	-0.553328	2.06678	pes,CG7227,asRNA:CR44996
2L:8003122-8004641	59.6649	78.2053	-0.390385	18.5404	0.626816	-18.5445	-0.270594	0.985684	Wwox,Spn28Dc
2L:8005222-8006576	38.4192	70.2509	-0.870689	31.8317	0.781391	-31.8436	-0.603515	1.52047	Wwox,Spn28Dc
2L:8009136-8013429	51.4708	89.8451	-0.803687	38.3743	0.823566	-38.3828	-0.557073	1.73481	CG12560,Tg,Glyat
2L:8028468-8030446	67.4584	68.1132	-0.0139365	0.654808	0.0379286	-0.654956	-0.00966003	0.0386666	CG7367,baf,Cka
2L:8031654-8032649	81.2225	70.2401	0.209584	10.9824	0.450248	10.9844	0.145272	0.598288	CG7367,Cka
2L:8035957-8036837	215.431	249.553	-0.21212	34.122	0.585311	-34.1227	-0.147031	0.880227	CG7367,Cka
2L:8044265-8045163	343.785	267.881	0.359918	75.9048	0.775759	75.9056	0.249476	1.49503	Megf8
2L:8088925-8092759	170.806	116.174	0.556079	54.6327	0.84424	54.6355	0.385444	1.85944	Bsg
2L:8095479-8098971	73.5996	51.3796	0.518504	22.2201	0.685039	22.2261	0.3594	1.15531	Bsg
2L:8103688-8107046	151.233	122.723	0.301359	28.5092	0.662822	28.5108	0.208886	1.08715	Bsg
2L:8128437-8130434	258.41	190.657	0.438685	67.7534	0.816951	67.7549	0.304073	1.698	CG8668
2L:8131325-8132864	208.831	189.539	0.139843	19.2922	0.440459	19.2927	0.0969316	0.580638	CG8668
2L:8148112-8149870	39.1783	91.4699	-1.22324	52.2916	0.890394	-52.3059	-0.847887	2.21086	PAPLA1,CG31606,CG43394
2L:8151497-8153125	35.8753	90.3678	-1.33282	54.4926	0.898172	-54.5089	-0.92384	2.28447	PAPLA1,CG43394
2L:8154248-8155399	52.5698	81.1883	-0.627037	28.6185	0.751397	-28.6253	-0.434629	1.3919	PAPLA1,CG43394
2L:8158684-8159650	365.773	328.69	0.15422	37.0827	0.486478	37.083	0.106897	0.666462	PAPLA1,Rbsn-5,CG43394
2L:8161946-8165041	74.8407	71.5875	0.0641148	3.25317	0.16499	3.2538	0.044441	0.180312	Acbp1,Rbsn-5,Piezo
2L:8169973-8173905	111.7	99.0631	0.173213	12.6372	0.444683	12.6383	0.120062	0.588216	Piezo
2L:8184176-8185166	40.6373	93.5472	-1.20289	52.9099	0.892606	-52.9235	-0.833779	2.23126	Piezo
2L:8204508-8206665	86.984	129.525	-0.574411	42.5412	0.818426	-42.545	-0.398151	1.70609	SLC5A11,CG8419,asRNA:CR44119,lncRNA:CR44120,lncRNA:CR44121
2L:8210758-8212600	73.6746	66.843	0.140392	6.83165	0.323924	6.83309	0.0973122	0.39145	Su(var)205,Ssb-c31a,CG8372,CG8360
2L:8212947-8214172	127.053	106.317	0.257065	20.7365	0.59414	20.7381	0.178184	0.901746	CG8372,CG8360,CG8353
2L:8214672-8215269	49.5896	101.001	-1.02625	51.411	0.88541	-51.4212	-0.711345	2.16639	CG8360,CG8353,CG8349
2L:8232523-8236512	86.0721	73.3514	0.230721	12.7207	0.490479	12.7228	0.159924	0.674284	Pvr
2L:8254557-8258074	123.839	97.2973	0.347999	26.5422	0.68115	26.5444	0.241215	1.14303	Btk,CG8086,mir-2b-1
2L:8269292-8271714	86.6551	68.8835	0.331127	17.7716	0.602432	17.7747	0.22952	0.922389	Btk
2L:8274849-8276828	134.925	182.114	-0.43269	47.1896	0.786912	-47.1916	-0.299918	1.54605	Btk
2L:8278863-8283783	112.06	77.6022	0.530105	34.458	0.777994	34.4621	0.367441	1.50505	Btk
2L:8283919-8288332	95.9786	63.1905	0.603004	32.788	0.778128	32.7936	0.41797	1.50565	Btk
2L:8289328-8292761	89.1659	68.2503	0.385657	20.9156	0.653234	20.9191	0.267317	1.05911	Btk,tRNA:Lys-TTT-1-1
2L:8295658-8298224	124.578	110.237	0.176439	14.3408	0.472084	14.3419	0.122298	0.638819	Btk,lncRNA:CR43752
2L:8301894-8303959	87.0715	55.7733	0.642627	31.2982	0.772026	31.3048	0.445435	1.47852	Btk,Scgalpha,wol
2L:8310659-8311885	117.569	73.8942	0.669969	43.6744	0.837155	43.6795	0.464387	1.81496	Mettl14,CG7810,CG7806
2L:8322797-8325341	377.268	321.948	0.228761	55.3197	0.633007	55.3202	0.158565	1.00241	CG7781
2L:8336959-8339782	168.824	110.139	0.616194	58.6849	0.8644	58.6882	0.427113	1.99805	witty
2L:8343299-8344785	86.9201	48.9281	0.829027	37.992	0.822359	38.0011	0.574638	1.72799	CG14273,asRNA:CR45371
2L:8360804-8364002	131.175	95.3284	0.460519	35.847	0.76702	35.85	0.319208	1.4568	RpS13,CG7627,CSN8
2L:8415911-8417224	314.878	380.495	-0.273083	65.6166	0.689084	-65.6172	-0.189287	1.16823	Akap200,CG13398
2L:8418883-8420148	179.946	149.392	0.268462	30.554	0.646551	30.5552	0.186083	1.04002	Akap200
2L:8422764-8425246	471.472	496	-0.0731674	24.5278	0.270819	-24.5279	-0.0507158	0.315834	Akap200
2L:8436913-8438815	106.179	60.8073	0.804188	45.3721	0.85517	45.3792	0.557421	1.93219	mus201,D12,Chrac-14
2L:8451322-8463240	52.9676	50.3894	0.0719901	2.57821	0.148719	2.57921	0.0498998	0.161013	Agpat2
2L:8478226-8479195	39.9102	112.505	-1.49516	72.5947	0.943565	-72.6101	-1.03636	2.87467	CheA29a,dachs
2L:8490794-8492975	73.7974	45.7772	0.68894	28.0202	0.748938	28.0286	0.477537	1.38206	CG13088,Dh31,CG43400
2L:8525226-8526728	46.2433	64.2957	-0.475478	18.0524	0.629431	-18.0587	-0.329576	0.992716	Acer,lmgB,lmgA
2L:8528755-8529258	41.75	95.5527	-1.19452	53.8027	0.895579	-53.8159	-0.827978	2.25933	CG17834,lmgB,lmgA
2L:8531055-8532446	45.8914	158.058	-1.78416	112.166	0.982656	-112.181	-1.23668	4.05452	CG17834
2L:8532990-8537020	57.5907	70.5351	-0.292505	12.9444	0.51759	-12.9477	-0.202749	0.72896	CG17834
2L:8540999-8548587	95.4297	71.0744	0.425108	24.3553	0.693599	24.359	0.294662	1.18286	Sema1a,CG17834,tRNA:Asp-GTC-1-5,tRNA:Asp-GTC-1-4
2L:8556187-8557793	284.172	236.029	0.267797	48.1424	0.677663	48.1431	0.185623	1.13216	Sema1a
2L:8570044-8574487	101.985	60.4753	0.753939	41.5097	0.836641	41.5166	0.522591	1.81181	Sema1a,tRNA:Phe-GAA-1-3
2L:8575694-8578817	110.498	69.6539	0.665737	40.8436	0.826293	40.849	0.461454	1.75039	Sema1a
2L:8603567-8606415	165.151	113.249	0.544286	51.9019	0.833669	51.9047	0.37727	1.79377	Sema1a
2L:8610790-8613106	423.054	522.572	-0.304788	99.518	0.728331	-99.5185	-0.211263	1.30317	Sema1a
2L:8623761-8625333	424.723	478.235	-0.171195	53.5112	0.531849	-53.5115	-0.118663	0.758965	Sema1a
2L:8628474-8632312	88.7093	50.4352	0.814655	38.2741	0.82341	38.2828	0.564676	1.73392	Sema1a
2L:8660638-8662516	115.69	73.6793	0.650935	42.0108	0.829042	42.0159	0.451194	1.76634	Sema1a
2L:8693247-8695168	53.7238	73.8138	-0.458329	20.09	0.654665	-20.0952	-0.31769	1.06324	Hnf4
2L:8699826-8700645	44.3493	65.5404	-0.563473	21.1911	0.675115	-21.1986	-0.39057	1.12428	Hnf4
2L:8732050-8734135	85.7137	63.2902	0.437544	22.4235	0.678311	22.4278	0.303282	1.13417	raw
2L:8734651-8736713	57.304	82.9255	-0.533179	25.6214	0.718989	-25.627	-0.369571	1.26936	raw
2L:8747409-8752393	113.857	150.477	-0.402312	36.6193	0.748245	-36.6215	-0.278862	1.3793	CG12438,CG45307
2L:8782581-8785131	265.546	155.318	0.773731	110.227	0.930759	110.23	0.53631	2.67016	CG42710
2L:8790923-8791980	254.588	227.234	0.163981	27.3532	0.496647	27.3537	0.113663	0.686464
2L:8793942-8797327	129.251	96.2535	0.42526	32.9971	0.745429	32.9999	0.294768	1.36818
2L:8798257-8807398	79.8996	56.5521	0.498607	23.3475	0.694962	23.3528	0.345608	1.18732
2L:8812183-8815090	143.448	147.509	-0.0402788	4.06138	0.145993	-4.06158	-0.0279192	0.157815
2L:8816867-8817902	43.8515	91.378	-1.05922	47.5264	0.871396	-47.5382	-0.734195	2.05102
2L:8818253-8819052	310.611	290.606	0.0960431	20.0047	0.35289	20.005	0.066572	0.435239
2L:8821162-8823594	336.902	587.051	-0.801155	250.149	0.944281	-250.15	-0.555318	2.88743
2L:8826967-8828114	102.112	42.4992	1.26464	59.6126	0.913951	59.626	0.876584	2.45284	SoxN
2L:8829763-8832710	119.666	65.0637	0.879085	54.602	0.889835	54.6091	0.609335	2.20578	SoxN
2L:8834639-8836673	321.055	256.615	0.323218	64.4406	0.73935	64.4414	0.224038	1.34458
2L:8841342-8843472	186.419	205.449	-0.140229	19.0297	0.439676	-19.0302	-0.0971993	0.579241
2L:8848895-8851438	189.066	223.9	-0.243966	34.8342	0.625989	-34.8351	-0.169105	0.98347	lncRNA:CR45365
2L:8858386-8862148	148.924	113.669	0.389742	35.2554	0.738992	35.2576	0.270149	1.34321	CG32986,asRNA:CR45260
2L:8870653-8872038	73.8922	156.593	-1.08352	82.7007	0.948773	-82.7078	-0.751042	2.97149
2L:8882898-8883923	44.428	96.5646	-1.12002	52.1365	0.889321	-52.1486	-0.776341	2.20112
2L:8896634-8899303	41.1012	87.8116	-1.09523	46.7104	0.868625	-46.7233	-0.759157	2.0297	CG34398
2L:8907196-8909316	45.0806	100.257	-1.15313	55.1767	0.900362	-55.1888	-0.799288	2.30621	CG34398
2L:8922114-8923676	102.077	124.152	-0.282454	22.0753	0.616736	-22.0771	-0.195782	0.959031	CG34398
2L:8924311-8925113	43.345	85.8969	-0.986741	42.5519	0.849224	-42.5633	-0.683957	1.89196	CG34398
2L:8941492-8943957	73.7832	63.0328	0.22719	10.7504	0.454763	10.7528	0.157476	0.606534	Argl,CG9515,C1GalTA
2L:8947217-8951312	126.622	85.6831	0.563445	40.9389	0.810871	40.9428	0.390551	1.66533	C1GalTA,CG46397
2L:8955868-8956487	90.2077	138.309	-0.616575	48.1015	0.842944	-48.1055	-0.427377	1.85115	CG31886
2L:8983272-8986627	46.1124	81.6478	-0.824259	35.5354	0.807072	-35.545	-0.571333	1.64544	rost,CG13101
2L:8989500-8990861	39.8955	101.432	-1.34622	61.5365	0.919494	-61.5512	-0.933125	2.51942	rost,CG9555
2L:8997774-8998865	70.711	58.3665	0.276794	12.3445	0.503531	12.3476	0.191859	0.700235	alien,Try29F,CG18661
2L:9035784-9038118	69.4133	48.8278	0.50751	20.5855	0.665259	20.5918	0.351779	1.0944
2L:9104549-9116354	128.186	87.0185	0.558845	41.1675	0.811631	41.1713	0.387362	1.66935	Or30a
2L:9133852-9137102	81.4062	69.9669	0.218466	11.4393	0.463815	11.4414	0.151429	0.623276	CG32982
2L:9139091-9139927	135.229	132.31	0.0314824	2.919	0.113026	2.91917	0.0218219	0.119939	CG32982
2L:9140034-9141423	232	176.302	0.396074	55.6978	0.785369	55.6992	0.274537	1.53884	CG32982
2L:9146516-9147011	277.587	337.3	-0.281092	59.7129	0.696415	-59.7135	-0.194838	1.19209	CG32982
2L:9163401-9165111	119.836	84.0709	0.51138	35.7649	0.779871	35.7685	0.354462	1.51354	CG13108,CG9586,CG32982
2L:9165675-9169038	82.1889	65.082	0.336686	17.107	0.596688	17.1103	0.233373	0.908044	CG13108,CG9586,tai
2L:9169196-9174212	77.1387	71.6805	0.105873	5.45817	0.268607	5.45919	0.0733859	0.312804	tai
2L:9175822-9178302	207.499	136.112	0.608307	71.3866	0.878436	71.3892	0.421646	2.10732	tai
2L:9195014-9198699	107.826	83.8238	0.363274	24.0023	0.670153	24.005	0.251802	1.10913	tai
2L:9203948-9205729	166.188	151.912	0.129575	14.2754	0.40253	14.276	0.0898143	0.515051	tai
2L:9223197-9225282	167.542	203.87	-0.283128	36.3281	0.669818	-36.3293	-0.19625	1.10811	tai
2L:9228195-9230730	216.501	210.586	0.0399651	5.91513	0.157011	5.91527	0.0277017	0.170802	tai
2L:9236547-9238557	116.029	103.952	0.15857	12.0772	0.428032	12.0782	0.109913	0.558672	tai,tRNA:Thr-AGT-1-1
2L:9254742-9258248	80.6933	68.8396	0.229211	11.8537	0.476018	11.8559	0.158877	0.646298	lectin-30A,Ggamma30A
2L:9260020-9262137	203.098	236.711	-0.220945	33.6122	0.598789	-33.6129	-0.153148	0.913267	lncRNA:CR45262,Ggamma30A
2L:9271292-9273128	299.266	185.233	0.692091	114.034	0.916678	114.036	0.479721	2.48504	Ggamma30A
2L:9283907-9291091	111.334	86.986	0.356036	24.3477	0.672634	24.3503	0.246785	1.11668	Ggamma30A
2L:9305282-9306776	614.663	674.471	-0.13396	59.8076	0.443789	-59.8078	-0.0928539	0.586607	lncRNA:CR42844
2L:9333669-9335907	104.624	67.7209	0.62754	36.9031	0.804635	36.9084	0.434978	1.63289	Eaat1
2L:9336704-9338302	87.6698	62.9821	0.477139	24.6877	0.704685	24.6923	0.330727	1.21971	Eaat1
2L:9370045-9375810	95.1054	131.764	-0.47036	36.6589	0.773501	-36.6619	-0.326029	1.48502	Shawl,asRNA:CR43865
2L:9381317-9384681	110.042	96.8554	0.184144	13.1862	0.46073	13.1875	0.127639	0.61754	Shawl
2L:9393411-9397265	56.0395	48.7733	0.200353	7.26622	0.359751	7.26899	0.138874	0.445899	CG4438,Shawl
2L:9417099-9419003	80.0462	65.7891	0.282983	14.257	0.537146	14.2599	0.196149	0.770344	Mco1
2L:9449653-9450901	39.5185	78.6968	-0.993776	39.1783	0.831344	-39.1909	-0.688833	1.7799	numb
2L:9453746-9455461	64.8643	146.17	-1.17216	81.3062	0.951388	-81.3147	-0.812477	3.02388	numb
2L:9457034-9460385	79.2663	77.9682	0.023823	1.29816	0.0675428	1.29838	0.0165128	0.069932	numb
2L:9493170-9495141	130.065	107.693	0.272311	22.3722	0.611908	22.3739	0.188751	0.946514	Gdi,CG33298
2L:9497057-9500427	131.033	109.363	0.260806	21.6701	0.600532	21.6717	0.180777	0.917621	CG33298
2L:9504522-9507013	110.832	124.187	-0.16414	13.3551	0.441263	-13.3561	-0.113773	0.582077	CG33298
2L:9511563-9513857	163.384	215.254	-0.397773	51.87	0.780184	-51.8715	-0.275715	1.51497	CG33298
2L:9526909-9528018	45.9908	130.767	-1.50757	84.7757	0.961379	-84.7891	-1.04497	3.25395	CG31883,Oatp30B
2L:9531132-9531871	210.603	128.751	0.709941	81.8521	0.9089	81.8551	0.492094	2.3958	Oatp30B
2L:9535368-9535570	40.8312	90.2102	-1.14362	49.379	0.879442	-49.3922	-0.792695	2.11563	Oatp30B
2L:9560757-9562437	291.795	303.996	-0.059095	12.2005	0.231639	-12.2007	-0.0409615	0.263496	jp
2L:9567835-9568689	356.401	290.191	0.296498	66.2098	0.720509	66.2105	0.205517	1.27478	brwl,lncRNA:CR44149
2L:9587204-9589102	111.197	85.346	0.381727	25.8514	0.690515	25.8542	0.264593	1.17284	CG3841
2L:9593106-9596535	70.4836	68.4305	0.0426483	2.05311	0.108355	2.05355	0.0295615	0.114687
2L:9613559-9615306	273.746	190.772	0.520986	82.9738	0.860467	82.9754	0.36112	1.96945	gcm2,Trx-2
2L:9617489-9618816	154.487	182.15	-0.237644	27.6634	0.609182	-27.6644	-0.164723	0.939512	GlcAT-S
2L:9619918-9621370	462.675	507.05	-0.132128	44.3745	0.442694	-44.3747	-0.0915838	0.58464	GlcAT-S
2L:9622872-9624919	64.4371	70.0579	-0.120657	5.62084	0.279022	-5.62213	-0.083633	0.327147	GlcAT-S,CG31882
2L:9626693-9629696	120.4	84.5449	0.510042	35.8548	0.780497	35.8584	0.353534	1.51639
2L:9661634-9664884	88.3312	52.0451	0.763162	36.2861	0.810514	36.2942	0.528984	1.66344	lncRNA:CR46208
2L:9681969-9687904	54.9319	88.8862	-0.694314	33.9542	0.792633	-33.9613	-0.481262	1.57327	Pka-C1
2L:9692418-9694484	232.182	251.539	-0.115527	19.3571	0.399803	-19.3574	-0.0800769	0.510498	Pka-C1
2L:9698208-9700057	209.447	102.026	1.03764	107.421	0.959993	107.426	0.71924	3.2187	Pka-C1,pelo,hoip
2L:9704417-9706445	90.1842	103.671	-0.201068	13.487	0.481114	-13.4885	-0.13937	0.656071	pelo,CG31710
2L:9712080-9713629	64.021	41.8498	0.613326	22.1712	0.688503	22.1797	0.425125	1.16637	Nckx30C,CG4364
2L:9716432-9719037	112.106	61.9301	0.856146	50.1755	0.875643	50.1828	0.593435	2.0846	Nckx30C
2L:9720305-9723449	108.018	98.144	0.138301	9.87412	0.379397	9.87508	0.0958631	0.477064	Nckx30C
2L:9729024-9729987	44.8424	105.752	-1.23775	60.9098	0.917393	-60.9224	-0.857945	2.49366	Nckx30C,CG13116
2L:9732931-9734485	92.8893	63.9629	0.538278	28.9265	0.746547	28.9315	0.373106	1.37258	Nckx30C
2L:9738084-9739440	454.512	416.82	0.124894	37.692	0.416007	37.6922	0.0865699	0.537867	Nckx30C,CG13117
2L:9750692-9757032	88.9418	92.8963	-0.0627607	3.95457	0.182066	-3.95507	-0.0435024	0.200974	Cyp4e3
2L:9777768-9780427	37.3663	98.9122	-1.40441	61.5459	0.91965	-61.5619	-0.973463	2.52137
2L:9781580-9782441	42.2344	112.641	-1.41524	70.4061	0.939632	-70.4204	-0.980967	2.80729	IP3K1
2L:9782469-9783848	41.1991	135.741	-1.72018	94.5421	0.971816	-94.5578	-1.19233	3.56901	IP3K1
2L:9784506-9786309	47.1377	144.151	-1.61263	97.0138	0.973314	-97.0272	-1.11779	3.6236	IP3K1,hpRNA:CR18854
2L:9815394-9818630	132.582	152.34	-0.200419	19.7589	0.531536	-19.7599	-0.13892	0.758297	nAChRalpha6
2L:9860585-9861767	357.292	524.595	-0.554101	167.303	0.884493	-167.304	-0.384073	2.15843	nAChRalpha6
2L:9894532-9896162	90.7943	35.9252	1.3376	54.8691	0.899937	54.8854	0.927157	2.30196	RpS2,Bka,snoRNA:Me18S-A1576,snoRNA:Me18S-G1620,snoRNA:U14:30Eb,snoRNA:U14:30Ea,Uhg2
2L:9904636-9909038	125.464	106.959	0.23022	18.5054	0.554624	18.5068	0.159576	0.808837	CG13124,Etl1
2L:9937523-9939130	78.334	50.4577	0.634565	27.8763	0.745496	27.8836	0.439847	1.36844	CG4619,CG31712,Datp,asRNA:CR45007
2L:9947516-9948809	46.2736	135.257	-1.54745	88.9836	0.96596	-88.9971	-1.07261	3.38023	CG5853,lncRNA:CR45949
2L:9970603-9973736	94.3979	62.2225	0.601318	32.1754	0.774217	32.181	0.416802	1.48818
2L:9980806-9986789	176.042	136.645	0.36549	39.3973	0.741652	39.399	0.253339	1.35345	bib,lncRNA:CR13130
2L:10002082-10004851	120.237	77.6934	0.630019	42.5437	0.828327	42.5484	0.436696	1.76216	Ndf,SoYb,CG31875,asRNA:CR44873
2L:10008541-10010677	110.626	81.0941	0.448022	29.5319	0.733807	29.5353	0.310545	1.32353	Trp1,Ndf
2L:10021906-10024412	96.1671	67.3241	0.514421	28.843	0.741406	28.8476	0.356569	1.3525
2L:10029052-10030972	284.36	254.461	0.160275	29.8992	0.500268	29.8996	0.111094	0.693684	CG13127
2L:10045651-10047492	150.953	133.758	0.174472	17.1947	0.480332	17.1956	0.120935	0.654565
2L:10059805-10061148	64.2642	48.3856	0.409438	15.8786	0.590027	15.8839	0.283801	0.891665	Spn31A,Pen
2L:10077934-10081240	117.661	96.2468	0.289825	21.4142	0.618099	21.4161	0.200892	0.962595	CG44153
2L:10081872-10089325	100.62	60.2982	0.738725	40.3215	0.831009	40.3282	0.512045	1.77791	CG44153
2L:10092717-10096414	72.9552	35.5209	1.03834	37.4343	0.820504	37.4487	0.719725	1.7176	CG13133,CG34109,CG44153
2L:10103540-10105862	391.523	372.016	0.073731	19.5066	0.269188	19.5068	0.0511065	0.313599	CG34109,CG44153
2L:10109174-10112700	124.089	100.741	0.300729	23.3484	0.636538	23.3503	0.20845	1.01208	CG34109,CG44153
2L:10122399-10124975	72.741	54.4994	0.416529	18.2416	0.627665	18.2464	0.288716	0.987962	CG13135,CG34109,CG44153
2L:10131055-10133003	60.6727	91.2358	-0.588553	30.5631	0.762796	-30.5688	-0.407954	1.43883	CG44153
2L:10146129-10149706	158.497	113.422	0.482762	45.0756	0.801819	45.0782	0.334625	1.61858	CG4839,CG44153
2L:10180061-10183121	239.745	236.399	0.0202803	3.34659	0.0886862	3.34665	0.0140573	0.092868	Sur,CG44153
2L:10203365-10205375	86.877	62.6607	0.471413	24.2163	0.699522	24.2209	0.326758	1.20238	Snx17,CG34159
2L:10248603-10251433	165.106	64.8271	1.34872	100.279	0.971481	100.288	0.934865	3.55718	bsk,Ror,CG31717
2L:10267956-10270382	74.9121	63.9075	0.229214	11.0046	0.460015	11.007	0.158879	0.616214	CG4953,CG4957,Mulk
2L:10309892-10312723	85.5562	62.2581	0.45861	23.2981	0.689531	23.3026	0.317884	1.16967	Cdk5alpha,Usp14,l(2)SH0834
2L:10314130-10315581	228.77	104.253	1.13381	124.517	0.971324	124.523	0.785898	3.55171	Usp14,CG4972
2L:10321098-10322668	52.852	131.326	-1.31312	78.474	0.951768	-78.485	-0.910187	3.03173	CG5381,CG4995
2L:10332425-10336827	88.6404	76.2197	0.217802	12.4208	0.48022	12.4227	0.150969	0.654349	Cox10,GATAd
2L:10337142-10341221	70.3912	68.5457	0.0383271	1.84541	0.102521	1.84581	0.0265663	0.108166	SamDC,GATAd,CG31715
2L:10383125-10383686	48.5176	58.8431	-0.278366	10.3255	0.460261	-10.3293	-0.192949	0.61667	gny,CG5096
2L:10387419-10390049	160.739	112.603	0.513473	48.1359	0.817643	48.1386	0.355912	1.70179	mRpS7,da
2L:10393155-10394076	114.714	53.6385	1.0967	61.0758	0.915583	61.0856	0.760177	2.47198	Mdh1,asRNA:CR45789,da
2L:10394648-10398498	116.611	116.481	0.00161204	0.130226	0.0094095	0.130236	0.00111738	0.00945405	Cnot4,Mdh1
2L:10412843-10415073	76.6477	51.2035	0.582001	25.4442	0.721023	25.4509	0.403412	1.27663	CG5355,Klp31E
2L:10422681-10424406	112.581	55.4571	1.02152	57.124	0.903402	57.1332	0.708065	2.33719	pie,Wdfy2
2L:10461000-10461518	40.4219	65.9565	-0.706377	25.5346	0.725694	-25.5444	-0.489623	1.29351	LManII
2L:10467099-10468552	41.5804	110.838	-1.41448	69.258	0.937307	-69.2724	-0.980444	2.76951	RluA-1
2L:10470140-10472759	55.8515	116.086	-1.05552	60.234	0.91223	-60.2433	-0.73163	2.43304	RluA-1
2L:10479532-10481857	121.717	100.914	0.270403	20.8029	0.601046	20.8047	0.187429	0.918909	RluA-2
2L:10615163-10617487	117.483	104.629	0.167167	12.8539	0.447007	12.8549	0.115871	0.59241	Trim9
2L:10641348-10641666	42.259	65.5575	-0.633503	23.2985	0.70122	-23.3072	-0.439111	1.20805	CG31872
2L:10660764-10661979	42.9812	225.333	-2.39028	182.352	0.997273	-182.368	-1.65682	5.90465	CG31871
2L:10746945-10748693	74.9301	93.4662	-0.318899	18.5361	0.608019	-18.5388	-0.221044	0.936543	CG17124
2L:10771207-10772187	35.1134	77.2758	-1.13799	42.1623	0.847325	-42.1777	-0.788796	1.87944	CG17127,CG31869
2L:10809148-10813686	63.7972	45.3049	0.493825	18.4923	0.636762	18.4989	0.342294	1.0127	Nos
2L:10849570-10852484	81.7899	79.5585	0.0399053	2.23133	0.114412	2.23168	0.0276602	0.121503	porin,SmydA-3
2L:10871241-10876893	84.9691	90.8857	-0.0971152	5.91661	0.271155	-5.91741	-0.0673151	0.316294	CG12517,lncRNA:CR45453,lncRNA:CR45454
2L:10884657-10887841	91.905	57.5821	0.674521	34.3228	0.793505	34.3294	0.467543	1.57748	CG14071,lncRNA:CR44490
2L:10916722-10920624	164.135	107.634	0.608752	56.5013	0.859595	56.5046	0.421954	1.96322	dpr2
2L:10925026-10928068	181.76	99.1765	0.873965	82.5835	0.932792	82.5881	0.605786	2.69997	dpr2
2L:10967549-10968805	237.066	256.903	-0.115933	19.8367	0.400407	-19.8371	-0.080359	0.511504	CG33129
2L:10975278-10977979	101.192	82.6214	0.292503	18.5703	0.594833	18.5726	0.202748	0.903455	abo,ATPsynG,SCAR
2L:11003516-11005948	65.3478	47.359	0.464501	17.9888	0.62695	17.9948	0.321967	0.986043	RpL9,Nup154,lectin-33A
2L:11014351-11015150	33.618	110.197	-1.71278	76.5788	0.95103	-76.5979	-1.18721	3.01655	Acp32CD,Samuel
2L:11022435-11026334	38.2773	70.5451	-0.882057	32.2678	0.784386	-32.2799	-0.611395	1.53427	Samuel
2L:11028846-11033166	62.0818	92.0867	-0.568823	30.0049	0.757431	-30.0103	-0.394278	1.41647	Samuel
2L:11036823-11038896	94.9387	63.1785	0.587563	31.7602	0.770953	31.7657	0.407268	1.47383	Samuel
2L:11045001-11046833	74.8655	145.104	-0.95471	70.238	0.925484	-70.2445	-0.661754	2.59674	Samuel
2L:11057348-11058114	43.5123	104.638	-1.26592	61.126	0.918086	-61.1391	-0.877466	2.50208	Samuel
2L:11061450-11063210	40.7209	88.6966	-1.12311	47.9757	0.873743	-47.9889	-0.778481	2.06943	Samuel
2L:11063914-11064334	42.2449	126.437	-1.58157	84.192	0.961043	-84.2068	-1.09626	3.2453	Samuel
2L:11066871-11067573	329.148	393.924	-0.259182	64.7762	0.677082	-64.7768	-0.179651	1.13036	Samuel
2L:11074970-11075663	35.1882	78.9289	-1.16546	43.7407	0.855259	-43.7562	-0.807836	1.93281	AstC,CG43725,lncRNA:CR45725
2L:11076962-11081760	112.25	89.0092	0.334686	23.2406	0.652832	23.243	0.231987	1.05795	AstC,CG43725
2L:11087213-11088710	306.582	254.026	0.2713	52.5567	0.681194	52.5574	0.188051	1.14317	CG16854
2L:11106010-11107690	69.6635	48.367	0.526381	21.2966	0.675093	21.3031	0.36486	1.12422	Reps,l(2)gd1
2L:11179152-11180647	72.2317	74.5598	-0.0457655	2.32808	0.127062	-2.32853	-0.0317223	0.135891	Boh2,Ca-beta
2L:11183120-11183427	33.0064	60.9055	-0.883824	27.899	0.74943	-27.913	-0.61262	1.38402	Ca-beta
2L:11187461-11189220	73.6799	47.711	0.626951	25.969	0.728041	25.9765	0.434569	1.3021	Ca-beta
2L:11189632-11190509	75.1141	69.7595	0.106695	5.35464	0.265656	5.3557	0.0739552	0.308778	Ca-beta
2L:11190684-11192385	193.659	221.258	-0.192208	27.5986	0.546198	-27.5993	-0.133228	0.790095	Ca-beta
2L:11195778-11197032	110.641	68.1207	0.699714	42.5198	0.836798	42.5256	0.485005	1.81276	Ca-beta
2L:11203347-11205504	341.914	421.37	-0.301454	79.4559	0.725538	-79.4565	-0.208952	1.29294	Ca-beta,lncRNA:CR43859
2L:11206586-11207679	106.177	74.6004	0.509223	31.5771	0.75846	31.5812	0.352966	1.42072	lncRNA:CR43859
2L:11227660-11228991	68.0024	57.4783	0.24257	10.5242	0.454025	10.527	0.168137	0.605183	ab
2L:11245149-11247106	162.988	115.272	0.499723	47.7158	0.813799	47.7185	0.346382	1.68093	ab
2L:11252059-11254671	80.0646	104.799	-0.388384	24.7341	0.68591	-24.7371	-0.269207	1.15808	ab
2L:11369554-11369969	34.3171	94.99	-1.46885	60.6729	0.917415	-60.6907	-1.01813	2.49393	salr
2L:11386422-11387643	41.2637	87.3414	-1.08179	46.0777	0.86592	-46.0904	-0.749842	2.00932	lncRNA:CR43681
2L:11515375-11518027	101.798	92.8726	0.132379	8.92501	0.355371	8.92599	0.091758	0.43908	Dlg5,CG4970
2L:11547780-11551706	156.051	141.587	0.140331	14.4643	0.419896	14.4649	0.0972703	0.544548	lncRNA:CR44494
2L:11569285-11574632	87.1109	59.095	0.559818	28.0159	0.742189	28.0215	0.388036	1.35553
2L:11585791-11593270	113.095	66.5953	0.764041	46.4995	0.856377	46.5058	0.529593	1.94056	kek2,Mst33A,lncRNA:CR44496,Acp33A
2L:11596806-11598437	136.707	80.0301	0.772469	56.6766	0.885499	56.6818	0.535435	2.16717	kek2
2L:11601650-11605464	207.162	267.427	-0.368383	60.2645	0.772741	-60.2657	-0.255344	1.48167	kek2
2L:11606644-11609008	115.124	62.734	0.875865	52.3897	0.883331	52.397	0.607104	2.14842	kek2
2L:11620599-11622045	236.246	348.606	-0.561304	112.359	0.882795	-112.361	-0.389066	2.14383	kek2
2L:11623750-11626882	98.2614	117.243	-0.254802	18.9814	0.574918	-18.9831	-0.176616	0.855474	kek2
2L:11629209-11631730	100.043	75.784	0.400659	24.2593	0.685575	24.2626	0.277716	1.15701
2L:11638488-11640881	222.987	570.899	-1.35628	347.912	0.989004	-347.915	-0.9401	4.51019
2L:11646440-11647617	101.455	102.096	-0.00907559	0.64024	0.037638	-0.640304	-0.00629072	0.0383646	CG6614
2L:11650152-11652935	185.551	172.92	0.10171	12.6309	0.335166	12.6313	0.0705003	0.408218	CG12307,CG4983
2L:11655102-11657792	309.725	254.795	0.281653	54.9303	0.693487	54.931	0.195227	1.1825	CG4983,CG43167
2L:11686300-11689322	158.104	146.368	0.11127	11.7356	0.35213	11.7361	0.0771264	0.434065
2L:11720674-11723290	90.8202	52.2696	0.797039	38.5505	0.824751	38.5588	0.552466	1.74155	lncRNA:CR44143
2L:11733083-11739559	87.0614	52.7308	0.723387	34.3306	0.796478	34.3382	0.501414	1.59198	Vha100-5,lncRNA:CR44145
2L:11803852-11807573	347.429	301.502	0.204553	45.9275	0.582674	45.9279	0.141785	0.873888	crol
2L:11812141-11813940	156.436	118.309	0.403015	38.1271	0.752716	38.1292	0.279349	1.39722	CycY,Pde1c
2L:11842622-11844285	86.7534	48.9346	0.826064	37.8188	0.82151	37.8278	0.572584	1.72322	CG14933,CG42486,CG44008,Pde1c,CG46426
2L:11850481-11852647	186.87	103.23	0.856171	83.64	0.932278	83.6444	0.593452	2.69235	Mal-B2,CG42751,Pde1c
2L:11868995-11870859	294.325	254.72	0.208501	39.6056	0.592888	39.6061	0.144522	0.898667	Pde1c
2L:11879889-11882347	100.216	53.5413	0.90439	46.6748	0.865026	46.6836	0.626875	2.00267	Pde1c
2L:11886143-11888295	128.133	73.1715	0.808286	54.9613	0.885588	54.9672	0.560261	2.16795	Pde1c
2L:11893299-11897288	73.4574	46.91	0.647012	26.5474	0.733494	26.5553	0.448474	1.32236	Pde1c
2L:11900648-11907524	84.678	58.4094	0.535786	26.2686	0.725113	26.2741	0.371379	1.29139	Pde1c
2L:11911653-11917881	113.202	88.9494	0.347846	24.2529	0.66736	24.2554	0.241109	1.10069	Pde1c
2L:11924751-11928746	178.037	95.342	0.900994	82.6951	0.935542	82.7	0.624522	2.74173	Pde1c
2L:11941619-11943753	237.886	284	-0.255623	46.1144	0.665057	-46.1151	-0.177184	1.0938	Crys
2L:11945839-11946183	40.9593	61.3466	-0.582791	20.3872	0.665415	-20.3956	-0.40396	1.09486	Crys
2L:11950120-11950924	40.639	104.362	-1.36065	63.7225	0.924702	-63.737	-0.943132	2.5863
2L:11955023-11956476	34.5822	68.2011	-0.979764	33.6189	0.795025	-33.6331	-0.67912	1.58487	lncRNA:CR43314
2L:11958081-11960400	39.24	79.6776	-1.02185	40.4376	0.838161	-40.4505	-0.708291	1.82115	lncRNA:CR43314
2L:11962760-11964799	44.3458	85.1962	-0.94199	40.8503	0.83939	-40.8612	-0.652938	1.82878	lncRNA:CR43314
2L:11965871-11966992	42.2914	74.0805	-0.808729	31.7891	0.780765	-31.7994	-0.560568	1.51761	lncRNA:CR43314
2L:11969586-11971344	36.9831	154.136	-2.05926	117.153	0.985405	-117.171	-1.42737	4.22709	lncRNA:CR43314
2L:11975687-11976941	48.4628	87.9584	-0.859944	39.4956	0.831769	-39.505	-0.596067	1.78242
2L:11980332-11981621	60.2447	86.1433	-0.515903	25.8986	0.719995	-25.9037	-0.357597	1.27295	CG16965
2L:11989379-11991231	114.396	56.956	1.00612	57.4403	0.903938	57.4491	0.697389	2.34276	dgt2,escl,CG34163,zuc
2L:12008051-12009068	237.907	167.024	0.510347	70.8836	0.848777	70.8855	0.353746	1.889	Rh5
2L:12009539-12011879	447.018	507.955	-0.184368	60.9369	0.552635	-60.9371	-0.127794	0.804381	Rh5
2L:12024688-12026668	53.7611	173.308	-1.6887	119.547	0.985428	-119.559	-1.17052	4.22862	dmGlut,lncRNA:CR44587
2L:12044710-12047242	358.003	242.187	0.563852	115.816	0.883555	115.818	0.390833	2.15033	CG6785,CG6770,Plzf,lncRNA:CR44589
2L:12051691-12054241	98.264	72.6561	0.43558	25.608	0.705445	25.6117	0.301921	1.22229	JhI-21,PLCXD
2L:12114504-12119274	40.0657	67.8154	-0.759245	27.7497	0.747173	-27.7601	-0.526269	1.37505	CG17211
2L:12120978-12121349	41.4915	76.616	-0.884831	35.1245	0.804613	-35.1357	-0.613318	1.63277	CG17211
2L:12133433-12135340	140.348	133.231	0.0750791	7.11704	0.260605	7.11744	0.0520409	0.301923	rho-6
2L:12152504-12157144	78.7959	128.46	-0.705122	49.6637	0.860847	-49.6687	-0.488753	1.97218	CG31760
2L:12176681-12178212	43.357	107.612	-1.3115	64.2547	0.925841	-64.268	-0.909061	2.60155	bru1,atilla
2L:12179445-12184659	89.5255	67.1203	0.41555	22.4052	0.674847	22.4091	0.288037	1.12346	bru1
2L:12286154-12289241	81.8768	53.6888	0.608833	28.188	0.747083	28.1946	0.422011	1.3747	bru1
2L:12305358-12310411	90.0462	66.049	0.447128	23.9972	0.694225	24.0013	0.309925	1.1849	bru1
2L:12314124-12317252	125.842	147.144	-0.225612	21.3017	0.571812	-21.3029	-0.156382	0.848192	bru1,lncRNA:CR45282,lncRNA:CR45283
2L:12359972-12360766	518.967	528.304	-0.025726	9.33718	0.131219	-9.33721	-0.0178319	0.140664	bru2
2L:12365164-12366371	77.7243	151.152	-0.95956	73.4275	0.930155	-73.4337	-0.665116	2.66148	bru2
2L:12368804-12370564	72.5077	93.9727	-0.374108	21.465	0.653413	-21.4683	-0.259312	1.05962	bru2
2L:12380175-12384801	134.732	107.257	0.32902	27.4749	0.677819	27.4769	0.228059	1.13264	bru2
2L:12389096-12397963	78.1684	63.7389	0.294411	14.4295	0.542801	14.4325	0.20407	0.782636	Pkd2,bru2
2L:12399756-12400312	37.4145	59.6583	-0.673127	22.2439	0.690291	-22.254	-0.466576	1.17212	Pkd2
2L:12422794-12424019	32.5085	67.6247	-1.05673	35.1162	0.805015	-35.1321	-0.732473	1.63483	Fam92,vir-1
2L:12432743-12436070	63.2324	55.9908	0.175475	7.24162	0.352622	7.24375	0.12163	0.434824	eRF3,snoRNA:SC35-a,snoRNA:SC35-b,SC35
2L:12454531-12456808	76.0761	52.4616	0.536183	23.6145	0.700595	23.6206	0.371653	1.20596	CR17024,bun
2L:12458309-12462604	169.562	135.706	0.321328	33.856	0.695923	33.8575	0.222728	1.19048	bun,mir-967
2L:12462816-12465358	234.957	170.652	0.461343	64.3055	0.823432	64.3071	0.319779	1.73405	bun
2L:12469435-12469892	82.1637	113.971	-0.4721	31.8078	0.75162	-31.8113	-0.327235	1.3928	bun
2L:12471816-12474021	642.871	529.503	0.279891	113.368	0.706875	113.369	0.194006	1.22716	bun
2L:12481340-12484711	239.778	196.768	0.285201	43.0096	0.69114	43.0105	0.197686	1.17487	bun
2L:12500878-12502941	297.686	306.359	-0.0414345	8.67356	0.163135	-8.67366	-0.0287202	0.178093	bun
2L:12507114-12508093	417.513	395.831	0.0769396	21.6829	0.29983	21.683	0.0533305	0.356432	bun,CG43051,snoRNA:CG43051-a
2L:12528007-12537950	84.1269	72.2481	0.219608	11.8788	0.471593	11.8809	0.152221	0.637888	bun
2L:12540013-12541062	126.609	106.056	0.255556	20.5532	0.592575	20.5548	0.177138	0.897899	bun
2L:12544525-12547147	86.7809	78.9332	0.136745	7.84768	0.345872	7.84887	0.0947844	0.424452	bun,lncRNA:CR42746
2L:12610379-12611055	45.3435	89.1595	-0.975495	43.8161	0.854812	-43.8269	-0.676162	1.92973	Ref2,nub
2L:12718895-12722327	80.0348	75.2938	0.0880967	4.74102	0.23307	4.74184	0.061064	0.265359	Pih1D1,MRP
2L:12768189-12771322	154.201	81.7218	0.91602	72.4793	0.926221	72.4851	0.634937	2.60669	lncRNA:CR46206
2L:12799448-12804073	125.789	89.3334	0.493736	36.4558	0.778083	36.4591	0.342232	1.50545
2L:12821608-12825532	80.3552	83.8476	-0.0613779	3.49239	0.171763	-3.49293	-0.0425439	0.188455	kek1
2L:12825629-12829023	139.058	92.812	0.583309	46.2465	0.83121	46.2502	0.404319	1.7791
2L:12961613-12964254	96.4775	126.539	-0.39132	30.0617	0.717737	-30.0642	-0.271242	1.26492
2L:12969074-12971434	93.3397	130.848	-0.487328	37.5082	0.782352	-37.5114	-0.33779	1.52488
2L:12990183-12995234	146.213	141.793	0.0442852	4.41998	0.14863	4.42021	0.0306961	0.160908	Yip1d1
2L:13032230-13034833	206.834	118.496	0.803641	88.3386	0.926959	88.3423	0.557042	2.61673	CG9932
2L:13045985-13048890	184.139	111.882	0.71882	72.2573	0.901792	72.2609	0.498248	2.32067	CG9932
2L:13052741-13057604	331.06	612.193	-0.886893	281.133	0.957244	-281.134	-0.614747	3.15224	CG9932
2L:13062889-13066810	68.7391	56.5213	0.282338	12.2179	0.50105	12.2211	0.195702	0.69525
2L:13067551-13074638	88.114	81.9038	0.105441	6.21022	0.286621	6.21111	0.0730862	0.337743
2L:13092987-13095069	78.5575	120.232	-0.613999	41.6744	0.821801	-41.6789	-0.425592	1.72485
2L:13096562-13097377	60.5101	117.081	-0.952257	56.5708	0.899267	-56.5788	-0.660055	2.29528	lncRNA:CR45447
2L:13098266-13101551	98.5896	90.175	0.128707	8.41457	0.347369	8.41555	0.0892132	0.426744	lncRNA:CR45447
2L:13104782-13107871	87.3042	64.3465	0.440189	22.9577	0.683519	22.9619	0.305116	1.15049	Ttc30,lncRNA:CR45461
2L:13135795-13137881	82.9913	100.06	-0.269837	17.0689	0.569487	-17.0711	-0.187037	0.842778	CG5122
2L:13139271-13142423	74.9997	77.8755	-0.0542833	2.87572	0.143847	-2.87624	-0.0376263	0.155306	CG9928,CG16978
2L:13204669-13207422	685.942	491.241	0.481654	194.7	0.857338	194.701	0.333857	1.94727	Pect
2L:13218984-13220480	79.6647	40.2941	0.983373	39.3706	0.832171	39.3829	0.681622	1.78481	CG9426,mRF1,Ski6
2L:13238595-13239544	39.5797	126.67	-1.67825	87.0906	0.964821	-87.1068	-1.16327	3.34729	Jhbp14,Jhbp13
2L:13246753-13249742	40.8843	106.907	-1.38673	66.0223	0.929999	-66.0368	-0.961209	2.65924	CG16820
2L:13317663-13322816	224.735	177.225	0.342639	47.5095	0.738233	47.5107	0.237499	1.3403	hbt
2L:13384833-13387935	83.4071	59.8072	0.479851	23.5999	0.694918	23.6048	0.332607	1.18717	loqs,Ing5,CG7099,asRNA:CR44599
2L:13425912-13427045	309.565	474.468	-0.616067	164.903	0.905056	-164.904	-0.427025	2.35446	CG42784
2L:13463977-13467688	343.563	534.062	-0.636431	190.499	0.910889	-190.5	-0.44114	2.41787	CG42784,CG46308
2L:13486252-13489613	77.785	36.7488	1.08179	41.0362	0.841134	41.0504	0.749843	1.83969	CG42784,CG46308
2L:13501335-13503382	163.084	108.507	0.587826	54.577	0.851191	54.5801	0.40745	1.90509	B4,CG42784,CG46308
2L:13511386-13515382	327.582	298.505	0.1341	29.0768	0.437151	29.0771	0.0929511	0.574743	B4
2L:13539231-13541039	286.504	284.078	0.0122661	2.42559	0.0556301	2.42562	0.00850222	0.0572373	B4,CG16852,CG9263
2L:13543761-13553344	94.3702	106.352	-0.17244	11.9815	0.437061	-11.9827	-0.119526	0.574585	B4,CG16853,kuz
2L:13575712-13579712	116.521	87.7829	0.408578	28.7381	0.718475	28.741	0.283205	1.26753	kuz
2L:13585382-13587618	308.772	236.598	0.384106	72.1743	0.788096	72.1753	0.266242	1.55162	kuz
2L:13611543-13619035	69.7669	57.0805	0.289545	12.6864	0.512807	12.6897	0.200697	0.719094	kuz
2L:13734115-13736747	69.6469	68.4436	0.0251431	1.20328	0.0729292	1.20354	0.0174279	0.0757254	nur
2L:13776537-13778870	186.862	275.937	-0.562363	89.0747	0.876335	-89.0764	-0.3898	2.09018	CG9008,asRNA:CR31845
2L:13778927-13779298	44.0312	97.4138	-1.1456	53.3826	0.894104	-53.3949	-0.79407	2.2453	CG9008,asRNA:CR31845
2L:13800674-13802672	136.497	142.637	-0.063483	6.14038	0.210987	-6.14071	-0.0440031	0.236973	CAH1,Sec71
2L:13804191-13805498	34.5383	109.628	-1.66634	75.0894	0.948348	-75.1079	-1.15502	2.96323	CAH1
2L:13819424-13821634	100.908	61.8856	0.705369	39.0227	0.822739	39.0291	0.488925	1.73013	b,Sos
2L:13835836-13837415	324.271	277.561	0.224396	46.7101	0.613897	46.7106	0.155539	0.951652	CenG1A,mRpS23
2L:13845545-13846991	94.4708	62.1455	0.604219	32.3253	0.775178	32.3309	0.418813	1.49244	CenG1A,CG7953,CG7916,CG8997
2L:13850081-13853388	181.725	158.997	0.192755	22.7277	0.532542	22.7286	0.133608	0.760446	CenG1A,CG7968,CG7953
2L:13865189-13865776	52.6146	64.3157	-0.289709	11.7011	0.493273	-11.7047	-0.200811	0.679782	CenG1A,lncRNA:CR44848
2L:13867151-13867878	221.026	295.953	-0.421151	74.9268	0.811899	-74.928	-0.29192	1.67078	CenG1A,lncRNA:CR44848
2L:13868872-13871336	156.964	96.2996	0.70483	60.6642	0.882772	60.6683	0.488551	2.14364	CenG1A
2L:13871728-13872656	40.7341	82.6076	-1.02004	41.8735	0.84547	-41.8859	-0.707036	1.86736	CenG1A
2L:13875900-13879009	148.421	125.769	0.238924	22.6524	0.589111	22.6537	0.165609	0.889432	CenG1A
2L:13880985-13883146	231.243	309.798	-0.421919	78.5551	0.813911	-78.5563	-0.292452	1.68153	CenG1A
2L:13883955-13885578	40.8058	110.985	-1.44352	70.1791	0.939319	-70.194	-1.00057	2.80212	CenG1A
2L:13891348-13895318	122.564	124.085	-0.0177883	1.52056	0.0725269	-1.52066	-0.0123299	0.0752915	CenG1A
2L:13914991-13915622	39.5482	149.651	-1.91992	110.103	0.981963	-110.119	-1.33078	4.01534	Ance-3
2L:13922210-13923449	44.3511	129.062	-1.54103	84.7112	0.961423	-84.7252	-1.06816	3.25511	Vajk1,Ance-3
2L:13926453-13927891	39.3894	98.2376	-1.31847	58.8483	0.912364	-58.863	-0.913893	2.43457	Ance-3
2L:13935770-13937125	36.3988	177.789	-2.28821	141.39	0.992468	-141.409	-1.58606	4.88859	Ance-3
2L:13940588-13942497	42.2474	78.603	-0.89572	36.3555	0.813352	-36.3666	-0.620866	1.67853	Ance-3
2L:13942661-13943555	48.8708	215.214	-2.13872	166.343	0.996133	-166.356	-1.48245	5.55538	Ance-3
2L:13943612-13944136	44.7838	231.326	-2.36888	186.542	0.997407	-186.557	-1.64198	5.95508	Vajk3,Ance-3
2L:13945521-13947813	50.5649	81.5537	-0.689616	30.9889	0.772138	-30.9965	-0.478005	1.47902	Vajk3,Ance-3
2L:13948499-13949555	46.6708	112.871	-1.27408	66.2002	0.929619	-66.2125	-0.883127	2.65383	Ance-3
2L:13951368-13953850	34.8048	120.404	-1.79052	85.5988	0.962809	-85.6175	-1.24109	3.29169	Ance-3
2L:13955539-13957541	69.0979	76.016	-0.137661	6.9181	0.325868	-6.91947	-0.0954195	0.39433	Ance-3,NimA
2L:13958282-13960639	45.4348	91.4945	-1.00989	46.0597	0.865317	-46.0708	-0.700001	2.00483	NimA
2L:14023034-14024589	495.713	551.896	-0.154891	56.183	0.491082	-56.1832	-0.107363	0.675469	lncRNA:CR31840,lncRNA:CR45352
2L:14046302-14047276	192.37	186.268	0.0465014	6.10167	0.187005	6.10184	0.0322323	0.207031	nAChRalpha5,NimC4
2L:14065096-14070342	72.7022	71.8652	0.0167075	0.83709	0.0528139	0.837257	0.0115807	0.0542597	nAChRalpha5
2L:14115800-14117194	360.094	529.707	-0.556821	169.613	0.888092	-169.614	-0.385959	2.19008	CG46301
2L:14123716-14126284	62.3681	131.539	-1.07661	69.1708	0.931071	-69.1792	-0.746248	2.67469	CG46301
2L:14132263-14135354	88.0667	154.458	-0.810545	66.3912	0.907067	-66.3961	-0.561827	2.37588	CG46301
2L:14137070-14144845	80.9131	96.3048	-0.251235	15.3917	0.539203	-15.3938	-0.174143	0.774797	CG46301
2L:14167265-14169709	38.7606	72.1873	-0.897156	33.4268	0.793214	-33.4388	-0.621861	1.57607	CG43333
2L:14170358-14172747	47.7072	64.4528	-0.434035	16.7455	0.606209	-16.7512	-0.30085	0.931935	CG43333
2L:14179915-14181150	47.2155	149.881	-1.66649	102.666	0.976957	-102.679	-1.15512	3.77038	CG43333
2L:14187671-14190167	216.796	132.026	0.71551	84.7693	0.912387	84.7723	0.495954	2.43482	Dyrk2
2L:14192914-14195806	117.592	68.4368	0.78094	49.1547	0.8663	49.1609	0.541306	2.01216	Dyrk2
2L:14202371-14204853	109.247	92.312	0.243002	16.9349	0.54935	16.9366	0.168436	0.797063	Dyrk2
2L:14205365-14206880	187.013	297.166	-0.668126	110.152	0.911001	-110.154	-0.46311	2.41913	Dyrk2
2L:14210103-14211503	230.351	254.578	-0.144276	24.2274	0.451723	-24.2278	-0.100005	0.600975	Dyrk2
2L:14218838-14219143	44.2296	96.5775	-1.12668	52.3479	0.89017	-52.3601	-0.780952	2.20882	Dyrk2
2L:14223411-14227065	79.1141	90.9635	-0.201354	11.8494	0.459099	-11.8512	-0.139568	0.614519	Dyrk2
2L:14228834-14234552	120.924	84.112	0.52372	36.8123	0.786375	36.816	0.363015	1.54353	Dyrk2,lncRNA:CR44727,lncRNA:CR44728
2L:14236688-14239037	57.04	79.6394	-0.48151	22.5995	0.68562	-22.6046	-0.333757	1.15715	lncRNA:CR44728
2L:14248748-14251184	117.529	77.7921	0.595321	39.7369	0.813397	39.7413	0.412645	1.67877
2L:14260339-14261390	528.999	492.242	0.103896	36.7566	0.362411	36.7567	0.0720152	0.450062
2L:14262998-14263988	44.6825	80.7287	-0.853373	36.0462	0.810871	-36.0563	-0.591513	1.66533	wb
2L:14264581-14264976	42.5574	309.85	-2.86409	267.293	0.999531	-267.308	-1.98524	7.66415	wb
2L:14288926-14291661	44.7561	80.3993	-0.845098	35.6432	0.807876	-35.6532	-0.585777	1.64962	wb,lncRNA:CR43639
2L:14294262-14296850	36.2342	83.7106	-1.20806	47.4765	0.871843	-47.4918	-0.837363	2.0545	wb,lncRNA:CR43640
2L:14298988-14300360	32.1747	100.334	-1.64081	68.1594	0.935273	-68.1791	-1.13733	2.73758	wb
2L:14300587-14301932	41.0011	132.635	-1.69373	91.6341	0.96938	-91.6498	-1.174	3.4861	wb
2L:14302926-14306268	38.798	99.4474	-1.35795	60.6494	0.917214	-60.6646	-0.94126	2.4915	wb
2L:14306939-14307661	39.1215	97.925	-1.32371	58.8034	0.91223	-58.8183	-0.917528	2.43304	wb
2L:14328536-14329207	33.2071	82.3992	-1.31114	49.1921	0.878995	-49.2096	-0.908813	2.11192	ms(2)34Fe,wb
2L:14334288-14336546	213.261	172.761	0.303841	40.4998	0.695297	40.5009	0.210606	1.18842	CG33090,ms(2)34Fe
2L:14354862-14357603	126.435	104.216	0.27882	22.219	0.617675	22.2207	0.193263	0.961483	Rab14,l(2)34Fd,lncRNA:CR44851
2L:14396035-14398200	60.9795	101.123	-0.729713	40.1434	0.829757	-40.15	-0.505799	1.77053	elB
2L:14400398-14405221	109.091	80.7418	0.434138	28.3487	0.722118	28.352	0.300921	1.28056	elB
2L:14405269-14406521	62.3489	137.205	-1.13789	74.8557	0.942157	-74.8644	-0.788728	2.85003	elB
2L:14429406-14430108	111.097	258.737	-1.21967	147.64	0.979661	-147.645	-0.845408	3.89522	lncRNA:CR44732
2L:14448825-14449151	42.5317	65.5475	-0.624002	23.0158	0.698158	-23.0242	-0.432525	1.19785	lncRNA:CR45726
2L:14450851-14451878	41.7655	122.192	-1.54876	80.4262	0.956171	-80.4411	-1.07352	3.12746	CG15283
2L:14459335-14460265	96.7547	82.3615	0.232362	14.3932	0.514014	14.3951	0.161061	0.721575
2L:14461206-14464864	101.148	142.37	-0.493185	41.2225	0.794444	-41.2255	-0.34185	1.58204
2L:14512418-14513564	42.829	123.809	-1.53145	80.9796	0.956998	-80.9941	-1.06152	3.14651	lncRNA:CR45693
2L:14515233-14516534	65.5091	154.025	-1.2334	88.5161	0.960172	-88.5247	-0.854927	3.22318
2L:14531055-14531763	102.735	114.791	-0.160084	12.0562	0.427786	-12.0572	-0.110962	0.558242	tRNA:Gly-GCC-1-7,tRNA:Gly-GCC-2-1,lncRNA:CR44852
2L:14545836-14547596	90.9001	78.2064	0.216994	12.6936	0.484556	12.6955	0.150409	0.662726	CG4218
2L:14557102-14558125	86.9104	86.6536	0.00426915	0.256801	0.0143713	0.256836	0.00295915	0.0144756	lncRNA:CR44854
2L:14570791-14572220	323.217	236.613	0.449978	86.6047	0.832506	86.6059	0.311901	1.78681
2L:14578136-14578888	53.9513	97.6201	-0.855521	43.6688	0.851571	-43.6772	-0.593002	1.90765
2L:14582193-14583005	57.1558	256.322	-2.16498	199.166	0.99772	-199.178	-1.50065	6.0837
2L:14612324-14616430	109.173	73.3276	0.574181	35.8449	0.791829	35.8495	0.397992	1.56939	Adh,Adhr,osp,lncRNA:CR43411
2L:14619431-14621763	367.509	306.742	0.260755	60.7672	0.675205	60.7678	0.180741	1.12456	Adh,Adhr,osp
2L:14621956-14623109	260.463	305.221	-0.228778	44.7584	0.625967	-44.759	-0.158577	0.98341	osp
2L:14628604-14631954	82.4929	98.9723	-0.262754	16.4794	0.557552	-16.4815	-0.182127	0.815433	osp
2L:14632895-14637296	75.3242	58.1222	0.374024	17.202	0.60422	17.2061	0.259254	0.926896	osp
2L:14639237-14641870	59.7822	69.3322	-0.213811	9.55007	0.421662	-9.55246	-0.148203	0.547597	osp
2L:14661095-14661345	47.8977	398.825	-3.05773	350.927	0.999866	-350.94	-2.11946	8.91691	osp
2L:14681903-14686050	229.388	321.337	-0.486297	91.9489	0.852286	-91.9502	-0.337076	1.91248	osp
2L:14701928-14709577	139.13	107.715	0.369222	31.4157	0.715145	31.4178	0.255925	1.25577
2L:14754611-14757742	131.607	342.457	-1.37968	210.85	0.989138	-210.855	-0.956324	4.52246
2L:14813502-14818476	110.851	135.961	-0.294574	25.1103	0.640539	-25.112	-0.204183	1.02315	CG33309
2L:14826376-14830064	45.5491	106.903	-1.23081	61.354	0.918421	-61.3663	-0.853131	2.50619
2L:14834971-14838061	79.2447	165.926	-1.06615	86.6811	0.951299	-86.6877	-0.739001	3.02205
2L:14871380-14875004	96.3234	91.6028	0.0724944	4.72059	0.210585	4.72115	0.0502493	0.236463	CG4480,CG15278
2L:14950552-14954052	203.635	292.039	-0.520179	88.4046	0.862411	-88.4061	-0.360561	1.98349	side-II
2L:15013069-15017727	136.661	169.986	-0.314811	33.3246	0.68714	-33.3261	-0.21821	1.162	GABA-B-R1,lncRNA:CR43856
2L:15020545-15024350	97.6278	65.1558	0.583399	32.472	0.77444	32.4772	0.404381	1.48917	GABA-B-R1
2L:15052534-15054871	40.0335	92.4321	-1.20719	52.3986	0.890774	-52.4125	-0.836757	2.21433	ck
2L:15063212-15067568	72.9117	60.743	0.263432	12.1687	0.49372	12.1716	0.182597	0.680665	vig,solo,vas
2L:15073939-15077573	233.921	206.449	0.180236	27.4721	0.530508	27.4727	0.12493	0.756105	CG15270,vas
2L:15094898-15098547	186.449	146.155	0.351282	40.2939	0.731259	40.2954	0.24349	1.31401	CG15270
2L:15143783-15147420	60.9253	274.665	-2.17256	213.74	0.998279	-213.751	-1.5059	6.36486
2L:15152912-15156398	131.527	87.1363	0.594014	44.3908	0.827388	44.3947	0.411739	1.75671
2L:15191203-15196394	88.2904	90.0432	-0.0283602	1.75277	0.0912789	-1.753	-0.0196578	0.095717	CG4168
2L:15198143-15200545	90.1025	157.719	-0.80772	67.6168	0.908855	-67.6216	-0.559869	2.39531	CG4168
2L:15211446-15214098	76.3023	179.974	-1.23799	103.672	0.969604	-103.679	-0.858109	3.49343
2L:15223977-15227795	78.2387	107.583	-0.459498	29.3445	0.735215	-29.3481	-0.3185	1.32884	ZnT35C
2L:15234284-15236725	93.5982	113.978	-0.284209	20.3803	0.604421	-20.3823	-0.196999	0.927405	ZnT35C
2L:15245796-15248354	85.4176	60.3914	0.500191	25.0262	0.710205	25.0312	0.346706	1.23858	ZnT35C,dao
2L:15316329-15317393	43.8245	130.501	-1.57425	86.6764	0.963815	-86.6907	-1.09119	3.3191	nht
2L:15331915-15334271	86.3356	95.4862	-0.145336	9.15054	0.378749	-9.1517	-0.100739	0.476021	esg
2L:15334314-15335458	42.6512	67.6622	-0.665764	25.011	0.719257	-25.0199	-0.461472	1.27032	esg
2L:15336749-15337171	42.1781	61.4183	-0.542174	19.2402	0.649546	-19.2478	-0.375807	1.04853	esg
2L:15337207-15337543	41.4982	71.817	-0.791276	30.3188	0.769098	-30.3291	-0.54847	1.46576
2L:15389357-15390346	35.5018	74.2678	-1.06485	38.766	0.828886	-38.7806	-0.738095	1.76542
2L:15415459-15416786	52.142	155.431	-1.57575	103.289	0.976443	-103.301	-1.09223	3.74832
2L:15420052-15421653	40.8003	86.5493	-1.08494	45.749	0.864333	-45.7619	-0.752025	1.99755
2L:15425739-15427119	42.8825	69.6276	-0.699271	26.7451	0.73678	-26.7543	-0.484698	1.33476	wor
2L:15428044-15428948	41.6348	103.493	-1.31368	61.8586	0.92003	-61.8726	-0.910571	2.52611
2L:15457048-15459754	71.5052	60.4895	0.241365	11.0158	0.464731	11.0184	0.167301	0.624986
2L:15464704-15466111	40.5789	86.6009	-1.09365	46.022	0.865808	-46.035	-0.758063	2.00849
2L:15477084-15477991	52.0473	63.0328	-0.27628	10.9855	0.475884	-10.989	-0.191503	0.646042	sna
2L:15488343-15494812	122.419	88.4127	0.469501	34.0062	0.762483	34.0094	0.325433	1.43751
2L:15498405-15501943	113.38	115.745	-0.0297793	2.36466	0.105471	-2.36485	-0.0206414	0.111458	lace
2L:15506259-15507109	318.622	350.088	-0.135872	31.466	0.46035	-31.4663	-0.0941794	0.616835
2L:15508576-15510047	423.862	513.309	-0.276234	89.4473	0.705467	-89.4477	-0.191471	1.22236
2L:15551618-15559588	161.801	116.204	0.47756	45.5971	0.802914	45.5996	0.33102	1.62412	kek3,CG15256
2L:15569327-15571483	133.481	254.275	-0.929753	120.794	0.954584	-120.797	-0.644456	3.09189	kek3
2L:15582981-15586760	126.516	86.7397	0.544552	39.7759	0.802736	39.7797	0.377454	1.62321	kek3
2L:15638249-15646209	101.557	77.9408	0.381838	23.6161	0.674847	23.6192	0.26467	1.12346	stol
2L:15759840-15760413	50.9331	91.959	-0.852388	41.0259	0.838653	-41.0348	-0.59083	1.8242	Gli
2L:15760573-15763994	143.142	80.7002	0.826802	62.4417	0.902754	62.4472	0.573095	2.33051	Gli,CG3793
2L:15785702-15786794	39.131	67.4029	-0.784499	28.2719	0.75238	-28.2828	-0.543773	1.39586	t-Grip91
2L:15836427-15837449	117.748	114.576	0.039396	3.17185	0.135331	3.1721	0.0273072	0.145409	CG18518,CR31822
2L:15845889-15847853	79.1377	156.152	-0.98051	77.0139	0.936659	-77.0201	-0.679638	2.75922	lncRNA:CR43763
2L:15870987-15875253	73.5219	50.674	0.536928	22.8479	0.693375	22.8542	0.37217	1.18213
2L:15880352-15882571	100.322	67.0479	0.581371	33.2739	0.779402	33.279	0.402975	1.51141	CG7653,CG44475
2L:15910256-15912873	120.653	238.208	-0.981363	117.556	0.95816	-117.56	-0.680229	3.17391	beat-Ib,lncRNA:CR44867,lncRNA:CR44868
2L:15915462-15917879	55.7408	79.0114	-0.503326	23.2706	0.694113	-23.276	-0.348879	1.18454	beat-Ib,CG13244
2L:15945998-15950982	93.9203	82.5995	0.185303	11.3208	0.444057	11.3223	0.128442	0.58709	beat-Ib
2L:15988804-15991618	140.955	110.631	0.349474	30.3236	0.699991	30.3256	0.242237	1.20394	lncRNA:CR43412
2L:16014989-16016485	69.647	619.258	-3.15241	549.611	1	-549.62	-2.18508	Inf	beat-Ic
2L:16032039-16037620	153.375	113.092	0.439572	40.2834	0.775289	40.2858	0.304688	1.49294	beat-Ic
2L:16049251-16053614	76.6079	68.472	0.161979	8.13589	0.366211	8.1375	0.112275	0.456039	BicC,beat-Ia,CG45084
2L:16059282-16060657	206.345	157.729	0.387607	48.6156	0.770439	48.6172	0.268669	1.47159	beat-Ia
2L:16167244-16170262	197.345	113.078	0.803403	84.2671	0.924635	84.2709	0.556876	2.58541	Ca-alpha1D
2L:16223212-16230963	103.803	74.4374	0.479748	29.3655	0.739842	29.3694	0.332536	1.34647	Ca-Ma2d
2L:16247842-16249540	163.495	99.2678	0.719846	64.2269	0.891869	64.2309	0.498959	2.22441	PRL-1,CG46309
2L:16250735-16258274	95.9819	80.0874	0.261187	15.8945	0.550601	15.8966	0.181041	0.799845	PRL-1,EndoGI,CG46309
2L:16268982-16274654	299.204	353.006	-0.238567	53.8028	0.646171	-53.8033	-0.165362	1.03894	crp
2L:16282303-16284767	311.55	307.548	0.0186546	4.00253	0.090586	4.00257	0.0129304	0.0949549	crp
2L:16305969-16307761	78.2625	59.0093	0.40738	19.2533	0.639444	19.2576	0.282374	1.02011	Syx5,CG5861,c(2)M
2L:16309883-16311013	107.512	65.9651	0.704722	41.5468	0.83273	41.5528	0.488476	1.78815	cni,fzy,Syx5
2L:16314466-16315795	85.8846	119.283	-0.473919	33.3985	0.759644	-33.4019	-0.328495	1.42563	cact
2L:16318643-16319467	54.6511	101.926	-0.899203	47.2751	0.867216	-47.2837	-0.62328	2.01904	cact
2L:16388593-16391931	59.8612	161.177	-1.42895	101.316	0.973917	-101.326	-0.990474	3.64648
2L:16418770-16422531	100.887	89.7469	0.168812	11.1405	0.426378	11.1418	0.117012	0.555784	CG5888,snoRNA:Me28S-A2958
2L:16424661-16431800	132.15	89.0495	0.569502	43.101	0.820258	43.1047	0.394749	1.71623	CG5888
2L:16434382-16437849	89.8071	57.6277	0.640066	32.1794	0.777681	32.1857	0.44366	1.50364	CG5888
2L:16443635-16444829	419.901	433.465	-0.0458647	13.5635	0.202785	-13.5636	-0.031791	0.226631	Idgf1,CG5888
2L:16447235-16448403	54.1205	97.1852	-0.84456	43.0647	0.848487	-43.0729	-0.585405	1.88708	Idgf2,Idgf1,CG5888
2L:16449210-16449567	40.9245	59.183	-0.532216	18.2584	0.635309	-18.2662	-0.368904	1.00871	Idgf2,CG5888
2L:16453650-16455023	355.488	321.127	0.146656	34.3608	0.484757	34.3611	0.101654	0.663117	Idgf3
2L:16459229-16461526	200.737	164.348	0.288552	36.3888	0.678714	36.39	0.200009	1.13542
2L:16463469-16463919	217.602	123.167	0.821076	94.435	0.933262	94.4385	0.569126	2.70698
2L:16463972-16465503	98.4813	71.6482	0.458919	26.8331	0.718028	26.837	0.318098	1.26595
2L:16465899-16468539	102.059	59.1038	0.788081	42.9552	0.845335	42.9624	0.546256	1.8665	dac
2L:16468647-16469610	106.101	47.7409	1.15215	58.3604	0.90995	58.3718	0.798606	2.40739	dac
2L:16469764-16473258	179.277	126.189	0.506603	53.0879	0.827008	53.0903	0.351151	1.75451	dac
2L:16474584-16477275	142.866	86.3049	0.72715	56.5613	0.880761	56.566	0.504022	2.12662	dac
2L:16479370-16482691	204.516	120.845	0.75905	83.6703	0.918689	83.6737	0.526133	2.50948	dac
2L:16483716-16488390	128.539	93.9649	0.452009	34.5738	0.758415	34.5767	0.313309	1.42053	dac,Nepl8
2L:16492683-16496748	81.4152	74.6751	0.124672	6.74016	0.307094	6.74132	0.0864161	0.366861	Tpr2
2L:16528485-16530498	50.9509	86.462	-0.76296	35.5112	0.805529	-35.5194	-0.528844	1.63747	CG5953,snoRNA:Me28S-C1237,mir-4943
2L:16544417-16548749	154.615	131.348	0.235283	23.2667	0.591994	23.2679	0.163086	0.896474	CG5968,mtgo
2L:16569942-16570935	394.868	384.693	0.0376634	10.1751	0.16499	10.1752	0.0261063	0.180312	mtgo
2L:16586732-16589584	336.883	438.47	-0.380229	101.587	0.797349	-101.587	-0.263555	1.59627	mtgo
2L:16597154-16597948	112.171	208.2	-0.892265	96.0285	0.942291	-96.0326	-0.618471	2.85235	mtgo
2L:16611310-16614432	87.3884	89.3697	-0.0323449	1.98135	0.0969782	-1.98162	-0.0224198	0.102009	mtgo
2L:16633623-16640525	74.5792	62.9353	0.244904	11.6439	0.476778	11.6465	0.169754	0.647749	mtgo
2L:16670514-16673125	309.991	260.176	0.252735	49.8144	0.656564	49.815	0.175183	1.06876	Trpgamma
2L:16686145-16692542	107.156	89.3092	0.262832	17.8468	0.572058	17.8487	0.182181	0.848767	grp
2L:16701119-16702064	288.169	366.024	-0.345021	77.8546	0.769232	-77.8553	-0.239151	1.46634	CR43669,CR43670
2L:16705503-16707052	155.854	311.828	-1.00056	155.975	0.965647	-155.978	-0.693535	3.37108	CG31808
2L:16709829-16719014	106.061	72.7709	0.543461	33.2901	0.773613	33.2946	0.376698	1.48551	CG31808,Cyt-c-d,Cyt-c-p
2L:16754483-16756754	35.8646	99.4922	-1.47202	63.6276	0.924813	-63.6446	-1.02033	2.58778	BuGZ,yellow-b
2L:16766047-16766248	42.2094	70.9555	-0.749349	28.7461	0.755979	-28.7558	-0.519409	1.4105	Mhc
2L:16776402-16777070	39.3749	69.5828	-0.821452	30.2078	0.76854	-30.219	-0.569387	1.46335	Mhc
2L:16807420-16809391	43.0905	72.8117	-0.756802	29.7212	0.764025	-29.7309	-0.524575	1.44403	CG13280,CG13272
2L:16818233-16819961	40.2742	128.278	-1.67134	88.0035	0.965603	-88.0194	-1.15849	3.36978	mdy,CG13280
2L:16881757-16884205	63.168	135.633	-1.10245	72.4654	0.93724	-72.4738	-0.764158	2.76844	CG31743,CG34313
2L:16885347-16887568	93.4897	94.6787	-0.0182325	1.189	0.0645926	-1.18914	-0.0126378	0.0667731	CG31743,osi,CG34313,tweek,lncRNA:CR44392
2L:16887616-16889551	74.9017	94.3157	-0.332499	19.414	0.621027	-19.4168	-0.230471	0.970291	osi,CG42556,tweek,lncRNA:CR44392
2L:16915881-16918447	99.1035	48.5039	1.03083	50.5996	0.882839	50.6101	0.71452	2.14421	tweek
2L:16937193-16944222	85.0041	60.5822	0.488638	24.4219	0.70388	24.4268	0.338698	1.21699	lncRNA:CR43053
2L:16948199-16951902	92.3868	60.1961	0.618018	32.1908	0.775915	32.1967	0.428378	1.49573	lncRNA:CR44393
2L:16961343-16966649	111.417	99.702	0.160272	11.7147	0.424433	11.7158	0.111092	0.5524	lncRNA:CR45285
2L:16969656-16974712	87.1892	112.266	-0.364694	25.0764	0.677529	-25.0791	-0.252787	1.13174	beat-IIIb
2L:16979124-16980825	467.478	484.228	-0.0507881	16.75	0.204238	-16.7501	-0.0352036	0.228455	beat-IIIb
2L:17036046-17037932	384.844	380.364	0.0168912	4.4795	0.0914353	4.47954	0.0117081	0.0958892
2L:17039046-17041832	107.857	73.0163	0.562829	34.8406	0.785012	34.8452	0.390123	1.53717	lncRNA:CR43802
2L:17054689-17055876	321.116	287.197	0.161053	33.9188	0.503889	33.9192	0.111634	0.700956
2L:17075437-17078849	94.8222	55.6723	0.768265	39.1499	0.827098	39.1575	0.532521	1.75503
2L:17083164-17085827	162.534	125.941	0.367998	36.5935	0.733695	36.5954	0.255077	1.32311	lncRNA:CR43819
2L:17105136-17105894	128.666	201.87	-0.649799	73.2042	0.888852	-73.2071	-0.450406	2.19689	lncRNA:CR45448
2L:17136950-17139620	206.062	271.922	-0.400114	65.86	0.795338	-65.8612	-0.277338	1.58639	CG34106,beat-IIIa
2L:17155764-17160319	129.551	89.2281	0.537954	40.3233	0.804524	40.3269	0.372882	1.63232	CG34106,beat-IIIa
2L:17172801-17174203	75.8227	35.9931	1.07491	39.8295	0.835099	39.844	0.745069	1.80241	CG34106,CG34169,beat-IIIa
2L:17178363-17179179	127.757	82.0343	0.639099	45.7224	0.840173	45.7268	0.44299	1.83366	Gr36b,Gr36a
2L:17238302-17243530	92.6765	77.2467	0.262731	15.4299	0.545081	15.4321	0.182111	0.787635	beat-IIIc
2L:17260109-17263689	74.3537	75.5592	-0.0232043	1.20557	0.0651066	-1.20579	-0.016084	0.0673228	beat-IIIc
2L:17340089-17342928	157.063	197.197	-0.328294	40.134	0.719056	-40.1353	-0.227556	1.2696
2L:17377629-17380578	215.878	161.035	0.422841	54.8428	0.793885	54.8445	0.293091	1.57932	Lrch
2L:17380669-17383665	259.692	171.605	0.597708	88.0868	0.886415	88.0888	0.414299	2.17521	Lrch
2L:17385819-17387292	117.602	151.495	-0.365358	33.893	0.724755	-33.8949	-0.253247	1.29009	CLIP-190
2L:17387529-17388070	82.5156	133.206	-0.69092	50.6903	0.860735	-50.695	-0.478909	1.97138	CLIP-190
2L:17389022-17390575	72.1554	126.766	-0.812989	54.6107	0.884382	-54.6167	-0.563521	2.15746	CLIP-190
2L:17393846-17397186	71.655	54.4833	0.395253	17.1717	0.60898	17.1762	0.273968	0.938998	CLIP-190
2L:17420557-17425489	142.636	95.7073	0.57564	46.9289	0.832752	46.9324	0.399003	1.78828	Dif
2L:17447643-17450555	134.674	147.094	-0.127264	12.4197	0.39093	-12.4204	-0.0882126	0.495822	dl,lncRNA:CR46204
2L:17470793-17472001	230.456	180.205	0.354851	50.2508	0.747866	50.252	0.245964	1.37779	BicD,Sgt
2L:17556031-17557245	264.821	249.802	0.0842349	15.0194	0.292991	15.0197	0.0583872	0.346712	CG7094
2L:17560028-17561790	273.711	172.003	0.670219	101.708	0.90852	101.71	0.46456	2.39163	lncRNA:CR45919
2L:17563605-17565089	443.004	573.071	-0.371393	130.067	0.792857	-130.067	-0.25743	1.57435	lncRNA:CR45919
2L:17588493-17591473	177.459	103.877	0.77261	73.5819	0.9108	73.5859	0.535533	2.41687	Oli,CG6870,Sytalpha,lncRNA:CR44410,lncRNA:CR44411
2L:17595020-17600594	107.377	81.7692	0.393056	25.6078	0.692437	25.6109	0.272446	1.17907	Sytalpha
2L:17606194-17607374	66.3937	317.324	-2.25684	250.93	0.998927	-250.94	-1.56432	6.83747	lncRNA:CR44412
2L:17615837-17622542	115.242	186.316	-0.693084	71.074	0.894976	-71.0774	-0.480409	2.25356
2L:17624593-17628256	87.669	73.3576	0.25712	14.3114	0.529659	14.3137	0.178222	0.754297	CG15147,CG43054,lncRNA:CR44413
2L:17692879-17698255	80.4236	50.3501	0.675625	30.0735	0.765098	30.0811	0.468307	1.44859	CadN
2L:17715824-17718073	101.044	45.7115	1.14435	55.3321	0.900787	55.3439	0.793202	2.31048	CadN
2L:17718172-17720318	157.454	76.4493	1.04235	81.0046	0.944839	81.0113	0.722505	2.8975	CadN
2L:17733801-17738515	94.751	99.6513	-0.0727481	4.90034	0.214184	-4.90088	-0.0504252	0.241032	CadN
2L:17746663-17748379	273.319	264.89	0.0451896	8.4285	0.195767	8.42862	0.0313231	0.217866	CadN
2L:17764019-17767275	173.474	114.129	0.604049	59.3445	0.86069	59.3475	0.418695	1.97105	CadN
2L:17770830-17771642	46.4882	113.184	-1.28373	66.6957	0.930848	-66.708	-0.889815	2.67145	CadN
2L:17834152-17837334	112.038	78.3052	0.516804	33.7325	0.771982	33.7365	0.358222	1.47833	CadN2
2L:17857969-17860863	269.605	327.378	-0.28011	57.7729	0.695633	-57.7736	-0.194157	1.18952	CadN2
2L:17869008-17870592	338.999	251.231	0.43227	87.7687	0.822739	87.7697	0.299627	1.73013	CadN2
2L:17899402-17904139	133.381	101.937	0.387881	31.4445	0.724129	31.4469	0.268859	1.28782	lncRNA:CR45332,lncRNA:CR45333
2L:17953855-17955624	160.783	109.96	0.548137	50.823	0.834361	50.826	0.37994	1.79795
2L:17992170-17994907	59.0238	232.941	-1.98059	173.917	0.995999	-173.928	-1.37284	5.52128	Prosbeta5R2,lncRNA:CR44767
2L:18012067-18013049	116.845	62.3053	0.90717	54.5398	0.89102	54.5473	0.628802	2.21659	elfless,rdo
2L:18025800-18026778	179.215	158.431	0.17783	20.7832	0.510818	20.784	0.123262	0.71502	rdo
2L:18061201-18062585	65.1569	88.5882	-0.443196	23.4313	0.687341	-23.4355	-0.3072	1.16264	rdo
2L:18093373-18096145	78.0074	178.553	-1.19467	100.545	0.966094	-100.553	-0.828081	3.38418	Slc25A46b
2L:18110466-18112000	96.6291	106.884	-0.14552	10.2552	0.395691	-10.2562	-0.100867	0.503669	CG44476
2L:18144906-18145882	200.275	354.108	-0.82221	153.834	0.945577	-153.836	-0.569913	2.91097	Socs36E,lncRNA:CR44478
2L:18148414-18152240	141.458	203.426	-0.524129	61.9678	0.842676	-61.97	-0.363299	1.84945	CG17681,Socs36E
2L:18232329-18234123	118.317	537.074	-2.18247	418.758	0.999441	-418.764	-1.51277	7.48979	CG42750
2L:18318555-18321258	92.7454	234.126	-1.33594	141.38	0.98355	-141.387	-0.926	4.10744	Fas3
2L:18340501-18346190	75.4033	117.877	-0.644588	42.4741	0.829757	-42.479	-0.446794	1.77053	Fas3
2L:18350692-18354525	68.1545	132.379	-0.957793	64.2244	0.915829	-64.2316	-0.663892	2.4749	Fas3
2L:18357320-18360903	58.2137	67.0068	-0.202948	8.79307	0.399647	-8.79541	-0.140673	0.510237	Fas3,Acp36DE
2L:18382613-18384130	219.031	174.524	0.32771	44.5071	0.726789	44.5083	0.227151	1.29751	Fas3
2L:18387578-18388791	36.0562	59.748	-0.728646	23.6919	0.706651	-23.7031	-0.505059	1.22639	Fas3
2L:18454726-18456528	124.426	70.4884	0.819833	53.9379	0.883465	53.9441	0.568265	2.14957	Ntf-2r,lncRNA:let7C,bsf
2L:18462768-18465040	114.572	221.452	-0.950738	106.88	0.951835	-106.884	-0.659001	3.03312	lncRNA:let7C
2L:18477186-18485266	81.0376	95.5017	-0.236935	14.4641	0.521546	-14.466	-0.164231	0.737195	CG10283,grnd
2L:18496499-18500552	71.7263	68.6275	0.0637145	3.09876	0.160319	3.09941	0.0441635	0.174733	kon
2L:18500864-18500918	40.4328	65.5568	-0.697217	25.1239	0.721179	-25.1336	-0.483274	1.27719	kon
2L:18518706-18520867	36.9033	84.8351	-1.20091	47.9319	0.873899	-47.9469	-0.83241	2.07067	CG10211
2L:18522310-18523202	49.2294	288.815	-2.55256	239.586	0.998994	-239.599	-1.7693	6.90201	CG10211,lncRNA:CR44903
2L:18531462-18533717	38.5676	64.9902	-0.752836	26.4227	0.734232	-26.4334	-0.521826	1.32513	CG10211,Pde11
2L:18537485-18538993	128.099	165.076	-0.365862	36.9761	0.73488	-36.9779	-0.253597	1.32757	Pde11
2L:18557564-18563074	83.8601	81.9764	0.0327756	1.88368	0.0945644	1.88397	0.0227183	0.0993391	Pde11
2L:18567030-18568344	111.852	151.716	-0.439777	39.8636	0.774194	-39.866	-0.30483	1.48808	Pde11
2L:18569904-18571191	268.677	247.009	0.121311	21.6683	0.404005	21.6687	0.0840864	0.517523	Pde11
2L:18574973-18577470	126.954	86.1125	0.560013	40.8416	0.810514	40.8455	0.388171	1.66344	Pde11
2L:18598139-18598716	34.3136	58.5965	-0.772035	24.2829	0.712843	-24.2952	-0.535134	1.24772
2L:18617531-18620316	244.284	164.268	0.572514	80.0169	0.875017	80.019	0.396837	2.07958	MESR3
2L:18622917-18627377	150.055	80.8957	0.891355	69.1592	0.919293	69.1649	0.61784	2.51693	MESR3
2L:18638798-18639697	520.21	408.831	0.347591	111.379	0.77558	111.38	0.240932	1.49424	MESR3
2L:18642917-18651322	133.08	115.488	0.204559	17.5927	0.518618	17.5939	0.141789	0.731094	Cyp310a1,MESR3
2L:18655811-18656427	487.971	332.034	0.555464	155.937	0.887689	155.938	0.385018	2.18649	MESR3
2L:18677950-18680360	195.649	186.115	0.0720793	9.53478	0.253878	9.53505	0.0499615	0.292866	tos,Mst36Fa,CG31751
2L:18708182-18709518	73.3448	92.4052	-0.333279	19.0604	0.617362	-19.0633	-0.231011	0.960665	Faf2,Grip71
2L:18724054-18724675	29.5291	243.119	-3.04145	213.59	0.998547	-213.611	-2.10817	6.53428	CG10348
2L:18732331-18732968	41.8531	160.398	-1.93825	118.545	0.985808	-118.561	-1.34349	4.25504	CG10348,lncRNA:CR44768
2L:18748668-18749677	47.327	105.655	-1.15863	58.3282	0.910129	-58.3397	-0.8031	2.40938
2L:18819305-18821047	39.1543	70.5894	-0.850282	31.4351	0.778396	-31.4466	-0.589371	1.50686	Ugt36F1
2L:18821089-18821746	42.9992	145.661	-1.76024	102.662	0.977136	-102.677	-1.2201	3.77817	Ugt36F1
2L:18841007-18841532	41.844	74.9924	-0.841724	33.1484	0.79089	-33.1591	-0.583439	1.56489	CG31752,CG33120
2L:18844212-18848975	119.4	111.814	0.0947072	7.58641	0.282956	7.587	0.065646	0.332618	CG17321,CG33120
2L:18849472-18853149	208.837	184.155	0.181459	24.6822	0.523781	24.6829	0.125777	0.741877	CG17321
2L:18946559-18949306	72.5632	53.6972	0.434391	18.866	0.637231	18.871	0.301097	1.01399	CG10428,lncRNA:CR44740,CG46304
2L:18973611-18974925	150.356	116.194	0.371851	34.1623	0.72556	34.1643	0.257747	1.29302	L2HGDH,CG10431
2L:18979685-18984412	87.305	91.4258	-0.066537	4.1208	0.197354	-4.12133	-0.0461199	0.219841	Swip-1
2L:18984470-18986792	137.762	126.608	0.121807	11.1537	0.364758	11.1544	0.0844299	0.453749	Swip-1,EMC5
2L:19013805-19017401	174.996	173.52	0.0122269	1.47684	0.051607	1.47689	0.00847506	0.0529863
2L:19019301-19022095	159.038	208.127	-0.388096	49.0895	0.771065	-49.091	-0.269008	1.47432	CG15172,lncRNA:CR44184
2L:19023513-19027228	219.491	239.03	-0.123026	19.5384	0.400049	-19.5388	-0.0852754	0.510908	CG15172,Sidpn,lncRNA:CR43700
2L:19034811-19036268	221.048	288.972	-0.386569	67.9237	0.791337	-67.9248	-0.267949	1.56703	CG31800,mib2
2L:19053929-19054908	98.3804	73.6743	0.417209	24.7061	0.693778	24.7096	0.289188	1.18344	CG10492,Rpn3
2L:19117258-19119331	70.3358	50.1637	0.487617	20.1722	0.658397	20.1781	0.337991	1.07411	Ddc,CG10561
2L:19120723-19122947	83.3837	65.1976	0.354945	18.186	0.613115	18.1895	0.246029	0.949628	Ddc,Phb1
2L:19134770-19138073	156.219	151.443	0.0447914	4.77561	0.151625	4.77582	0.031047	0.164432	brat,Polr1D
2L:19144404-19147371	169.803	144.986	0.227942	24.8162	0.587904	24.8173	0.157997	0.886499	brat
2L:19160628-19162562	300.3	586.902	-0.966715	286.602	0.965133	-286.604	-0.670076	3.35623	brat
2L:19189563-19193967	97.7235	82.6036	0.242502	15.12	0.530039	15.1219	0.16809	0.755105	pigeon,drl
2L:19196021-19200273	90.3636	123.094	-0.445945	32.7303	0.750279	-32.7333	-0.309106	1.38741	drl
2L:19216588-19219794	254.34	206.884	0.297933	47.4555	0.705355	47.4565	0.206512	1.22198	lncRNA:CR44189,lncRNA:CR46209
2L:19225974-19226158	45.3303	58.2671	-0.362207	12.9368	0.529748	-12.9419	-0.251063	0.754487
2L:19231371-19231543	81.6157	329.774	-2.01456	248.159	0.998167	-248.167	-1.39639	6.30195
2L:19235083-19235546	835.283	555.834	0.587612	279.45	0.898082	279.45	0.407302	2.28359
2L:19249720-19251685	127.371	114.676	0.151473	12.6949	0.422712	12.6958	0.104993	0.549415
2L:19270518-19272273	71.1043	61.4326	0.210933	9.67171	0.424277	9.67401	0.146207	0.552129	lncRNA:CR44190
2L:19272741-19274415	51.5718	290.282	-2.4928	238.711	0.99895	-238.724	-1.72788	6.85852	lncRNA:CR44190
2L:19292812-19294354	473.188	546.196	-0.207005	73.008	0.607014	-73.0083	-0.143485	0.93398
2L:19311264-19312479	54.5595	226.305	-2.05237	171.746	0.996267	-171.758	-1.42259	5.59067
2L:19322921-19324597	283.644	279.075	0.0234272	4.56876	0.0917259	4.56882	0.0162385	0.0962091	lncRNA:CR45700
2L:19359432-19359738	44.2955	135.979	-1.61816	91.6838	0.969179	-91.6981	-1.12162	3.47955	dnt
2L:19367846-19369736	261.279	260.965	0.00173233	0.313545	0.0155782	0.31355	0.00120076	0.0157008	CG17349
2L:19389199-19390101	39.4198	117.553	-1.57632	78.133	0.953467	-78.1489	-1.09262	3.06758	CG17549,CG17544
2L:19399463-19400894	97.9343	43.3177	1.17686	54.6166	0.898574	54.6292	0.815735	2.28843	CG17544,Pax
2L:19415853-19416302	41.6019	85.9974	-1.04764	44.3955	0.857785	-44.4078	-0.726171	1.95041	Pax
2L:19420457-19421167	49.8403	80.9727	-0.700123	31.1324	0.773613	-31.1403	-0.485288	1.48551	Pax,lectin-37Db
2L:19422876-19424462	242.653	207.706	0.224354	34.9474	0.600979	34.9481	0.15551	0.918741	Alp12,CG13085,Pax
2L:19424632-19425849	62.9744	67.9611	-0.109945	4.98675	0.255174	-4.98797	-0.076208	0.294605	Alp12,CG13085,Pax
2L:19438381-19439930	37.0576	178.53	-2.26833	141.473	0.992468	-141.491	-1.57228	4.88859	CG10237
2L:19453638-19456939	111.533	87.8611	0.344169	23.6715	0.659827	23.674	0.23856	1.0783	CG10026,Top2
2L:19459669-19461263	503.003	519.147	-0.0455774	16.1445	0.203992	-16.1445	-0.0315919	0.228146
2L:19463716-19464751	87.761	175.814	-1.00239	88.0526	0.947655	-88.0583	-0.694807	2.94991	tj
2L:19464805-19465877	154.212	41.6866	1.88726	112.525	0.983148	112.541	1.30815	4.08328	tj
2L:19466466-19467946	246.887	177.757	0.473943	69.1298	0.83197	69.1314	0.328512	1.78361	tj
2L:19469255-19470849	492.465	500.816	-0.0242604	8.35132	0.0943856	-8.35136	-0.016816	0.0991417	lncRNA:CR43839,lncRNA:CR45722,lncRNA:CR45723
2L:19472739-19475092	104.975	72.472	0.534549	32.503	0.767333	32.5074	0.370521	1.45815
2L:19476920-19483303	85.1899	60.7482	0.487839	24.4416	0.704059	24.4465	0.338145	1.21759	CG10195
2L:19517857-19520976	190.086	164.578	0.207882	25.5082	0.566939	25.509	0.144093	0.836877	Hasp,CG10132,lncRNA:CR43363
2L:19526083-19529017	156.578	148.283	0.078521	8.29423	0.270104	8.2946	0.0544266	0.314853	CG10132,Dpm1,CG10137,CG10165
2L:19535951-19538613	51.952	73.4627	-0.499832	21.5107	0.67516	-21.5165	-0.346457	1.12442	CG13082,CG31697,CG33116,lncRNA:CR45455
2L:19550923-19551312	40.0942	87.6905	-1.12903	47.5963	0.872067	-47.6097	-0.782583	2.05624	Tep4
2L:19566238-19567123	90.9142	41.3705	1.1359	49.5437	0.88009	49.5567	0.787348	2.12102	spi,CG13077
2L:19568948-19575937	131.149	135.212	-0.0440181	4.06315	0.145993	-4.06339	-0.030511	0.157815	spi,mir-2a-1,mir-2b-2,mir-2a-2
2L:19586129-19590452	153.79	112.271	0.453981	41.5194	0.782263	41.5219	0.314675	1.52447	Lar,CG10366
2L:19681541-19687573	102.087	81.5522	0.323998	20.5344	0.626548	20.537	0.224578	0.984965	Lar,CG46244
2L:19701396-19702960	117.861	44.9865	1.38952	72.874	0.943588	72.8873	0.96314	2.87507	Lar,scw,CG46244
2L:19735900-19736647	121.844	47.3038	1.365	74.5399	0.946404	74.5524	0.946148	2.92628	CG10462,Nf-YB
2L:19763506-19764293	263.239	261.581	0.00911714	1.6583	0.0528363	1.65832	0.00631952	0.0542833	fbp
2L:19766441-19767825	139.169	53.9143	1.3681	85.2552	0.960306	85.2662	0.948297	3.22655	bsh
2L:19770202-19774232	391.609	367.769	0.0906142	23.8401	0.330495	23.8402	0.062809	0.401216	CdGAPr
2L:19774723-19777588	101.391	74.7488	0.439801	26.6417	0.712351	26.6454	0.304847	1.24601	CdGAPr
2L:19783394-19786032	277.388	233.727	0.247079	43.6608	0.650932	43.6615	0.171262	1.05249	CdGAPr
2L:19787576-19792582	108.751	70.9926	0.615288	37.7584	0.807697	37.7634	0.426485	1.64869	fs(2)ltoPP43,CdGAPr,CG10466
2L:19795247-19798366	100.708	55.7738	0.852523	44.9345	0.856242	44.9426	0.590924	1.93963	fs(2)ltoPP43,sick
2L:19866763-19868281	262.033	208.054	0.332796	53.9798	0.739015	53.9808	0.230676	1.34329	sick
2L:19882811-19885616	60.7959	144.882	-1.25283	84.086	0.956774	-84.0953	-0.868397	3.14132	sick
2L:19896727-19898622	141.706	114.079	0.312866	27.6268	0.666287	27.6286	0.216862	1.09747	sick
2L:19920138-19924686	184.517	158.105	0.222876	26.4126	0.582227	26.4136	0.154486	0.872817	sick,lncRNA:CR43827,lncRNA:CR43828
2L:19929317-19932380	103.504	83.4044	0.31149	20.0995	0.618189	20.1019	0.215908	0.962829	sick
2L:19939426-19945469	73.3892	84.7498	-0.207642	11.3606	0.457221	-11.3625	-0.143926	0.611054	sick
2L:19946692-19950025	68.6972	98.319	-0.517219	29.6218	0.747933	-29.6263	-0.358509	1.37806	sick
2L:20027557-20029360	221.607	116.275	0.930462	105.332	0.949712	105.336	0.644947	2.98998	sNPF
2L:20036755-20043524	112.597	96.5424	0.221939	16.055	0.525524	16.0565	0.153836	0.745544	sNPF
2L:20045346-20049239	70.8177	46.2877	0.61348	24.53	0.712954	24.5376	0.425232	1.24811	sNPF
2L:20051705-20052631	264.208	257.283	0.0383186	6.92509	0.160274	6.9252	0.0265604	0.17468	sNPF
2L:20065419-20070397	138.018	101.789	0.439267	36.2284	0.76179	36.2311	0.304477	1.4346	vls,CG10730,bwa,asRNA:CR44907
2L:20080426-20083521	98.7289	58.7853	0.748017	39.9436	0.830093	39.9506	0.518486	1.7725	neb,fok
2L:20086115-20087908	118.727	85.4136	0.475104	33.3129	0.761477	33.3163	0.329317	1.43329	neb
2L:20121170-20124229	234.031	207.848	0.17117	26.1829	0.511421	26.1834	0.118646	0.716254
2L:20124812-20126397	427.207	465.867	-0.124983	38.6599	0.416276	-38.6601	-0.0866313	0.538326
2L:20128719-20130694	75.2673	259.361	-1.78486	184.093	0.995239	-184.102	-1.23717	5.34738
2L:20136174-20140206	162.773	152.256	0.0963585	10.5166	0.324438	10.517	0.0667907	0.39221
2L:20264163-20270600	73.4349	59.0576	0.314342	14.3772	0.548076	14.3807	0.217885	0.79424	CG17570
2L:20291870-20293759	185.2	384.656	-1.05448	199.455	0.971704	-199.458	-0.730911	3.56505	CG12617
2L:20297588-20298581	38.2658	97.9214	-1.35557	59.6555	0.914488	-59.6709	-0.939607	2.45909	lncRNA:CR43414
2L:20299275-20303071	45.7308	111.759	-1.28915	66.0281	0.929418	-66.0407	-0.893572	2.65097
2L:20312716-20315314	204.38	166.773	0.293369	37.6071	0.681574	37.6082	0.203348	1.14437	spir,lncRNA:CR43606
2L:20322174-20325273	43.2332	114.535	-1.40558	71.3018	0.941084	-71.3156	-0.974272	2.83165	spir
2L:20326725-20327238	26.1663	68.685	-1.39229	42.5187	0.849627	-42.5415	-0.96506	1.89463	spir
2L:20329852-20331626	245.675	278.576	-0.181319	32.9008	0.538912	-32.9013	-0.125681	0.774166	spir
2L:20334605-20335792	42.8065	98.521	-1.2026	55.7145	0.902597	-55.7275	-0.833579	2.3289	spir
2L:20338442-20339987	177.94	149.713	0.24919	28.2269	0.621787	28.228	0.172726	0.972298	spir
2L:20342118-20343181	342.496	342.193	0.00127345	0.302183	0.0153323	0.302186	0.000882688	0.0154511	spir
2L:20343750-20345168	72.505	48.8063	0.571011	23.6986	0.703455	23.7055	0.395795	1.21556	spir
2L:20347586-20349065	64.3745	38.5847	0.738458	25.7897	0.728488	25.8003	0.51186	1.30375	spir,La
2L:20350858-20353491	353.121	185.525	0.928548	167.596	0.959658	167.598	0.643621	3.21035	La,RtGEF,snoRNA:Me28S-A3365
2L:20364173-20364417	47.7932	85.9493	-0.846679	38.156	0.823678	-38.1654	-0.586873	1.73544	RtGEF
2L:20364775-20368384	122.938	142.576	-0.213804	19.6383	0.542242	-19.6394	-0.148198	0.781415	RtGEF
2L:20378154-20378822	30.2503	104.135	-1.78344	73.8849	0.945845	-73.9064	-1.23618	2.91591	CG16798
2L:20382336-20384849	317.031	296.722	0.0955116	20.3089	0.353315	20.3091	0.0662036	0.435895	CG16798,CG10947
2L:20396181-20398889	165.24	141.504	0.223714	23.7353	0.572773	23.7364	0.155067	0.850439	CG10947
2L:20425917-20430883	168.722	110.681	0.608244	58.0412	0.861718	58.0443	0.421602	1.97846	CG31688
2L:20435285-20438280	99.5645	84.7101	0.233097	14.8544	0.520071	14.8562	0.16157	0.734116	CG31688,lncRNA:CR43607
2L:20540361-20543576	141.176	64.211	1.1366	76.9645	0.945219	76.9729	0.787829	2.90442	lncRNA:CR45707
2L:20543589-20546245	75.1537	46.3078	0.698588	28.8458	0.756135	28.8543	0.484224	1.41114
2L:20584889-20593665	110.329	83.2529	0.406242	27.0763	0.70806	27.0794	0.281586	1.23121	lncRNA:CR44909
2L:20626442-20627674	184.418	124.28	0.569387	60.1382	0.855237	60.1409	0.394669	1.93266	lncRNA:CR44909
2L:20647298-20648347	95.04	98.9532	-0.0582122	3.91324	0.181396	-3.91367	-0.0403496	0.200154	CG2608,CG18810,snoRNA:Me28S-C2645c,snoRNA:Me28S-C2645b,snoRNA:Me28S-C2645a,Uhg3
2L:20667017-20667949	46.2137	78.918	-0.772033	32.7043	0.786778	-32.7134	-0.535133	1.54542	CG31678,lncRNA:CR45004
2L:20673325-20674978	236.81	150.802	0.65108	86.0087	0.897926	86.0112	0.451294	2.28206	CG31678
2L:20699915-20701284	43.0839	151.912	-1.81801	108.828	0.981047	-108.843	-1.26015	3.96579	Hr38
2L:20701435-20702000	45.7004	178.558	-1.96611	132.857	0.990278	-132.872	-1.3628	4.63332	Hr38
2L:20715937-20716750	35.5791	93.6253	-1.39587	58.0462	0.910375	-58.063	-0.967542	2.41212
2L:20724418-20724931	38.5555	88.6074	-1.20049	50.0519	0.882348	-50.0663	-0.832118	2.14002	CG9316
2L:20732731-20736333	91.1979	63.1413	0.530417	28.0566	0.739104	28.0616	0.367657	1.34363	TM9SF2,Fs(2)Ket
2L:20738736-20739721	207.479	164.294	0.336686	43.185	0.731483	43.1863	0.233373	1.31484	Fs(2)Ket
2L:20781650-20783984	55.7184	96.1467	-0.787083	40.4283	0.833937	-40.4359	-0.545564	1.79539	cad
2L:20793068-20794480	350.21	357.969	-0.0316141	7.75893	0.130034	-7.759	-0.0219132	0.139302	vari,lncRNA:CR44146
2L:20794626-20796092	346.602	352.765	-0.0254262	6.1627	0.127933	-6.16275	-0.0176241	0.13689	vari,lncRNA:CR44146
2L:20800756-20802319	333.652	328.415	0.0228225	5.23662	0.092754	5.23667	0.0158193	0.0973417	CG9328
2L:20822661-20825475	97.6362	121.45	-0.314879	23.8142	0.64559	-23.8163	-0.218258	1.0373	CG9331
2L:20829093-20831832	83.0018	70.7573	0.230263	12.2444	0.482008	12.2466	0.159606	0.657795	CG31673,CG31674
2L:20839457-20844528	86.3461	84.6162	0.0291965	1.72986	0.0905637	1.73011	0.0202375	0.0949303	CG31676
2L:20851223-20856432	121.552	83.4988	0.541742	38.0529	0.796031	38.0567	0.375507	1.58979	CG14402,twit,CG14400
2L:20857818-20859315	477.111	394.163	0.27553	82.9474	0.704685	82.9478	0.190983	1.21971	twit,CG14400,CG9336
2L:20860933-20861759	57.3843	68.1782	-0.248656	10.794	0.463032	-10.7969	-0.172356	0.621818	CG9336,CR9337
2L:20869259-20872482	101.72	48.5305	1.06764	53.1897	0.892405	53.2004	0.740034	2.22938	CG14401,sky,CG31675,CG43739
2L:20877221-20882157	82.3645	58.5359	0.492701	23.8286	0.69827	23.8337	0.341514	1.19822	sky,CG43739
2L:20883925-20884747	284.455	261.265	0.122689	23.1904	0.406665	23.1908	0.0850415	0.521996	sky,CG43739
2L:20889778-20891653	115.159	144.403	-0.326475	29.2441	0.686111	-29.2459	-0.226295	1.15872	sky,CG43739
2L:20896560-20897767	214.449	183.224	0.227022	31.2245	0.606455	31.2253	0.15736	0.932559	sky,CG43739
2L:20897931-20900818	88.3126	54.3955	0.699131	33.9171	0.793125	33.9243	0.484601	1.57564	sky,CR33317,CG43739
2L:20903240-20909804	229.106	184.498	0.312408	44.6077	0.711345	44.6088	0.216545	1.24252	sky,CG43739
2L:20913113-20916729	171.771	113.521	0.597529	58.2501	0.859126	58.2531	0.414176	1.95989	sky,CG43739
2L:20921764-20923174	127.507	150.137	-0.23571	22.6306	0.58891	-22.6319	-0.163382	0.888943	CR33318,Mtp
2L:20935783-20939766	91.7099	71.9835	0.349411	19.7264	0.629967	19.7295	0.242193	0.994164
2L:20941246-20943628	52.4206	86.5843	-0.723972	34.1637	0.79536	-34.1714	-0.501819	1.5865
2L:20957993-20961607	114.455	169.371	-0.565402	54.9157	0.847459	-54.9186	-0.391907	1.88032
2L:20976255-20982439	59.0656	58.2452	0.020179	0.820401	0.0519869	0.820649	0.013987	0.053387	CG42238
2L:21002358-21005517	167.116	138.31	0.272947	28.8062	0.641344	28.8075	0.189192	1.02539	CG42238
2L:21012032-21015835	87.6245	65.9932	0.409016	21.6313	0.665169	21.6351	0.283509	1.09413	CG42238
2L:21026485-21037114	93.2598	122.834	-0.397387	29.5746	0.719235	-29.5772	-0.275448	1.27024	CG42238,snoRNA:Me28S-C2789
2L:21059794-21060372	32.3162	90.2599	-1.48183	57.9437	0.910062	-57.9627	-1.02713	2.40864	CG9265
2L:21064086-21064850	40.0548	95.294	-1.25041	55.2392	0.901122	-55.2534	-0.866718	2.31387	CG9265
2L:21066893-21069606	53.7173	109.081	-1.02193	55.3632	0.898306	-55.3727	-0.708351	2.28579	CG9265
2L:21091177-21092630	54.0428	94.0758	-0.79972	40.033	0.832685	-40.0409	-0.554324	1.78788	CG9259,CG14397
2L:21092958-21094476	41.779	89.1278	-1.0931	47.3488	0.870949	-47.3614	-0.757677	2.04755	CG14397,l(2)05287
2L:21103858-21108590	69.4486	59.8895	0.213644	9.55915	0.421796	9.56154	0.148087	0.547829	CG9257,Nhe2,asRNA:CR43809,lncRNA:CR44056,CG46307
2L:21116303-21120815	102.988	72.2564	0.511276	30.7314	0.753364	30.7357	0.35439	1.39984	Nhe2,CG46307
2L:21141640-21143074	226.574	80.1499	1.49921	146.424	0.988423	146.432	1.03917	4.45869	Dap160,pths,snoRNA:Me18S-A469
2L:21145321-21146116	236.102	274.4	-0.216872	38.2982	0.605918	-38.2988	-0.150324	0.931197	pths,del
2L:21155185-21156416	87.7443	47.7593	0.877525	39.985	0.834786	39.9947	0.608254	1.80051	E2f2,Mpp6
2L:21197115-21199720	105.634	103.466	0.0299145	2.16778	0.101381	2.16799	0.0207351	0.106896	Ret,CG31624
2L:21218743-21220426	398.343	317.275	0.328277	81.0678	0.755465	81.0685	0.227544	1.4084	CG8677,CG8679,Atg18b
2L:21235547-21239313	74.9047	96.2311	-0.361447	21.3264	0.648809	-21.3295	-0.250536	1.04642	CG31626,Hr39,mir-9374
2L:21245022-21245977	47.3664	108.115	-1.19063	60.7485	0.916477	-60.7602	-0.825281	2.48263	Hr39
2L:21284227-21285802	89.5439	53.2297	0.750363	36.3142	0.810335	36.3219	0.520112	1.66249	Mondo,Cyp6t2Psi
2L:21309417-21310844	269.559	229.525	0.231952	40.0343	0.621608	40.035	0.160777	0.971825	crc,Mondo
2L:21312504-21313277	41.8331	175.976	-2.07267	134.143	0.990836	-134.159	-1.43666	4.69251	crc
2L:21313489-21315886	56.4781	94.2093	-0.738178	37.7312	0.817979	-37.7384	-0.511666	1.70363	crc,CG46314
2L:21344000-21346337	161.44	138.129	0.22499	23.3118	0.571387	23.3129	0.155951	0.847201	Tsp39D
2L:21378298-21378893	172.349	206.644	-0.261816	34.2952	0.646931	-34.2962	-0.181477	1.04109	CG8665
2L:21379149-21382487	246.884	283.957	-0.201838	37.0727	0.57503	-37.0733	-0.139903	0.855737	nrv3
2L:21619712-21620670	145.359	117.3	0.309424	28.0596	0.668656	28.0613	0.214476	1.1046	CG2201
2L:21622662-21625614	73.2462	85.9131	-0.230124	12.6669	0.489674	-12.669	-0.15951	0.672706	Df31,CG2201,lncRNA:CR43148
2L:21631752-21634313	200.959	114.996	0.805321	85.9633	0.927183	85.9671	0.558206	2.6198	Ac3
2L:21681224-21682183	125.748	82.5663	0.606911	43.1817	0.827388	43.186	0.420678	1.75671	eEF2,sncRNA:254
2L:21683021-21686802	79.0981	57.1128	0.469828	21.9853	0.678088	21.9903	0.32566	1.13348	eEF2,nolo
2L:21746212-21747364	38.3265	81.8589	-1.0948	43.5324	0.854521	-43.5462	-0.758857	1.92773	step
2L:21752710-21755856	75.6746	78.2124	-0.0475882	2.5378	0.134236	-2.53824	-0.0329856	0.144143	step
2L:21756026-21758591	124.313	72.1079	0.785751	52.2054	0.875978	52.2113	0.544641	2.08729	CG1416,step
2L:21827722-21829688	135.778	264.076	-0.959706	128.298	0.958473	-128.302	-0.665218	3.18141	tsh
2L:21863431-21863696	35.9688	152.031	-2.07955	116.062	0.984981	-116.081	-1.44143	4.19841	lncRNA:CR44917
2L:21866468-21866956	44.009	167.948	-1.93215	123.939	0.987752	-123.954	-1.33926	4.40239	lncRNA:CR44917,lncRNA:CR44918,lncRNA:CR44919
2L:21898462-21900651	117.574	127.91	-0.121553	10.3354	0.357874	-10.3361	-0.0842541	0.442971	CG11629
2L:21921103-21922746	49.5268	416.762	-3.07294	367.235	0.999933	-367.248	-2.13	9.61006	CG11634
2L:21969240-21971904	92.9515	106.564	-0.197175	13.6129	0.482701	-13.6143	-0.136671	0.659134
2L:21978089-21979469	43.022	80.9084	-0.911216	37.8865	0.822806	-37.8974	-0.631607	1.73051	CG2528
2L:22108200-22108982	35.9225	100.43	-1.48323	64.5072	0.926847	-64.5242	-1.02809	2.61521	CG10834,CG6675
2L:22131117-22132280	82.6348	72.8958	0.180915	9.73906	0.410889	9.74074	0.125401	0.529141	CycK,CG42748,CR43240,lncRNA:CR43241
2L:22145792-22150257	193.442	122.265	0.66189	71.1769	0.888986	71.18	0.458787	2.1981	CG42748
2L:22536191-22537780	131.569	58.9452	1.15838	72.6243	0.939699	72.6335	0.802927	2.8084	CG17490,RpL5,snoRNA:Psi28S-2996,lncRNA:CR46268
2L:22735090-22736161	41.9995	74.0072	-0.817295	32.0078	0.782464	-32.0182	-0.566506	1.52539	CG40006
2L:23020744-23021187	54.5383	106.728	-0.968593	52.1894	0.886572	-52.1984	-0.671377	2.17659	Cht10
2L:23171785-23175272	85.6671	69.6359	0.29891	16.0312	0.569219	16.034	0.207189	0.842156	CG12567,lncRNA:CR44268
2R:545324-545677	39.7246	75.0954	-0.91869	35.3707	0.806513	-35.3827	-0.636788	1.64254	DIP-lambda
2R:1071847-1072970	145.459	88.1916	0.721895	57.2669	0.880358	57.2715	0.500379	2.12326	rl,lncRNA:CR41257
2R:2642156-2643347	43.757	62.3144	-0.510052	18.5574	0.638773	-18.5644	-0.353541	1.01825
2R:4012916-4014776	137.912	95.8218	0.525318	42.0898	0.807876	42.0931	0.364123	1.64962	Haspin
2R:4545928-4548411	113.841	63.6876	0.837931	50.1531	0.874212	50.1601	0.58081	2.07316	Stlk
2R:4619019-4620571	106.773	109.771	-0.0399516	2.9981	0.132448	-2.99837	-0.0276923	0.14208	CG17486,lncRNA:dntRL
2R:4752865-4754356	113.962	54.4153	1.06647	59.5468	0.910978	59.5563	0.739221	2.41888	conu
2R:4799330-4800091	37.1065	69.5412	-0.906195	32.4347	0.785794	-32.4473	-0.628127	1.54082
2R:5089400-5091440	104.03	117.597	-0.176848	13.5668	0.464776	-13.5679	-0.122582	0.62507	CG3107
2R:5096008-5097474	36.3314	62.8544	-0.790796	26.523	0.735148	-26.5348	-0.548138	1.32858	CG3107
2R:5413057-5414259	32.9353	72.7313	-1.14294	39.7961	0.834943	-39.8125	-0.792229	1.80146	stw
2R:5494440-5496798	38.2309	66.1046	-0.790013	27.8737	0.748782	-27.8849	-0.547595	1.38143	Ugt50B3,CG30440
2R:5603582-5605090	97.9362	35.5083	1.46369	62.428	0.921841	62.4451	1.01455	2.54901	Fis1
2R:5651468-5653215	110.151	66.6611	0.72457	43.4902	0.842475	43.4963	0.502234	1.84817	CG1344,hrm
2R:5667968-5672230	88.2174	56.9144	0.632268	31.3029	0.77111	31.3093	0.438255	1.47451	CG8245,kune
2R:5686002-5686733	40.4791	103.292	-1.35148	62.8131	0.922623	-62.8276	-0.936776	2.55907	scaf
2R:5702160-5702882	230.432	108.81	1.08252	121.621	0.967413	121.626	0.750348	3.42385	vlc
2R:5708580-5710585	94.5434	48.2417	0.970694	46.3016	0.865585	46.3118	0.672834	2.00682	ap
2R:5711665-5714941	176.756	113.413	0.640174	63.3429	0.875665	63.3462	0.443735	2.08478	ap
2R:5716207-5716786	312.56	239.965	0.38131	72.595	0.788499	72.596	0.264304	1.55352	ap
2R:5716951-5721712	158.191	123.042	0.362513	35.1486	0.723079	35.1505	0.251275	1.28402	ap
2R:5725702-5726778	363.368	332.72	0.127123	30.648	0.438179	30.6483	0.088115	0.576572	ap
2R:5730140-5732580	154.754	141.746	0.126667	13.0078	0.395244	13.0084	0.0877988	0.50293
2R:5735057-5738119	96.7546	58.5972	0.723499	38.1574	0.819051	38.1643	0.501492	1.70954
2R:5740247-5744016	225.723	180.764	0.320446	44.959	0.720218	44.9602	0.222116	1.27375
2R:5744344-5746256	347.009	316.458	0.132959	30.5511	0.438112	30.5514	0.0921604	0.576452
2R:5746952-5751412	121.544	80.7282	0.590333	40.8157	0.815721	40.82	0.409188	1.69131
2R:5751855-5754499	99.6094	68.7448	0.535031	30.8646	0.758907	30.8692	0.370855	1.42257	l(2)09851
2R:5781558-5783100	74.3157	118.559	-0.673862	44.2429	0.838966	-44.248	-0.467085	1.82614	ZnT41F
2R:5805342-5807928	156.576	80.2286	0.964677	76.3477	0.934357	76.3538	0.668663	2.72352	dpr12
2R:5810339-5815090	279.25	211.102	0.403614	68.1476	0.796992	68.1488	0.279764	1.59451	dpr12
2R:5820892-5824780	181.571	106.481	0.769942	75.0904	0.91261	75.0944	0.533683	2.43738	dpr12
2R:5827496-5831958	128.165	80.6802	0.667714	47.4846	0.8488	47.4893	0.462824	1.88915	dpr12
2R:5835075-5836307	168.725	111.579	0.596605	57.1458	0.857561	57.1489	0.413535	1.94884	dpr12
2R:5836397-5839126	187.868	170.493	0.140006	17.375	0.433664	17.3756	0.0970451	0.568568	dpr12
2R:5843274-5849272	133.497	92.2594	0.533035	41.2372	0.805239	41.2407	0.369472	1.63598	dpr12
2R:5851739-5855530	100.544	88.6057	0.182356	11.9383	0.44551	11.9397	0.126399	0.589706	dpr12
2R:5865382-5868833	95.017	81.8507	0.215191	13.1663	0.491864	13.1681	0.149159	0.677007
2R:5898912-5901688	94.681	201.517	-1.08975	106.836	0.963301	-106.842	-0.75536	3.305	CG43366
2R:5936295-5939383	225.489	194.922	0.210158	30.5668	0.579545	30.5675	0.145671	0.866418	lncRNA:CR44126
2R:5939618-5941816	58.7256	56.6087	0.0529645	2.11685	0.119507	2.11751	0.0367122	0.127274	lncRNA:CR44126
2R:5982254-5983679	146.972	90.5508	0.698744	56.4214	0.875911	56.4257	0.484332	2.08675	Src42A
2R:5990318-5993424	83.3424	109.06	-0.388001	25.7177	0.693264	-25.7207	-0.268942	1.18177	Src42A
2R:5999019-6000195	28.1873	114.472	-2.02188	86.285	0.96377	-86.3087	-1.40146	3.31787	Src42A
2R:6007130-6008173	32.8786	89.1296	-1.43876	56.2511	0.904966	-56.2695	-0.997271	2.35352	Src42A
2R:6014861-6015421	342.077	441.837	-0.369194	99.7602	0.789817	-99.7609	-0.255906	1.55978	Act42A
2R:6016386-6017866	145.938	102.762	0.506047	43.1759	0.805865	43.1789	0.350765	1.6392	Act42A,Pngl
2R:6034439-6036916	179.595	112.077	0.680258	67.5181	0.88865	67.5215	0.471519	2.19508	SCAP,CG14591
2R:6039346-6042468	229.231	170.606	0.426127	58.6241	0.803607	58.6256	0.295369	1.62764	CG14591,Tbce
2R:6095130-6096386	284.341	232.897	0.287932	51.4443	0.700416	51.4451	0.199579	1.20536	EcR
2R:6096439-6108805	55.9726	58.5625	-0.0652558	2.58988	0.149211	-2.5907	-0.0452319	0.161591	EcR
2R:6111066-6111810	452.493	441.847	0.0343499	10.6464	0.131577	10.6465	0.0238096	0.141076	EcR
2R:6115395-6117313	159.241	162.247	-0.0269805	3.00606	0.114076	-3.00618	-0.0187015	0.121124	EcR
2R:6119651-6122684	127.701	118.15	0.112147	9.55072	0.336149	9.55138	0.0777345	0.409698	EcR
2R:6132814-6134791	393.672	404.492	-0.0391176	10.8201	0.165415	-10.8202	-0.0271142	0.180821	EcR
2R:6139354-6143939	110.448	81.0523	0.446436	29.3952	0.733092	29.3986	0.309446	1.32085	EcR,tRNA:Lys-CTT-1-1,tRNA:Arg-ACG-1-1,CG14589
2R:6154805-6155712	76.8887	103.678	-0.431272	26.7897	0.710987	-26.7932	-0.298935	1.24129	EcR
2R:6157679-6159523	158.929	162.698	-0.0338107	3.76862	0.119977	-3.76877	-0.0234358	0.127807	EcR,lncRNA:CR43904
2R:6183987-6184695	36.7784	67.2966	-0.871677	30.5182	0.771132	-30.5307	-0.6042	1.47461	Ptr
2R:6184839-6186129	45.0447	82.4658	-0.872439	37.4211	0.819588	-37.4313	-0.604728	1.71251	Ptr
2R:6219571-6224121	221.081	224.546	-0.0224355	3.46493	0.0890662	-3.465	-0.0155511	0.0932851	bin3,lncRNA:CR44161
2R:6241901-6242278	50.4234	112.48	-1.1575	62.0562	0.918913	-62.067	-0.802316	2.51223	Pld
2R:6244797-6247103	44.023	104.212	-1.2432	60.1893	0.915449	-60.2021	-0.861718	2.4704	Pld
2R:6500901-6504966	78.8743	100.416	-0.348367	21.5421	0.646775	-21.5449	-0.24147	1.04065	jing,lncRNA:CR46075
2R:6512962-6513776	252.843	361.314	-0.515012	108.471	0.867976	-108.472	-0.356979	2.02477	jing
2R:6515219-6516159	39.219	84.0105	-1.09901	44.7914	0.859841	-44.8049	-0.761779	1.96498	jing
2R:6543555-6544605	342.712	410.391	-0.260004	67.6794	0.678177	-67.6799	-0.180221	1.13375	jing
2R:6551727-6554982	171.083	108.891	0.651808	62.1918	0.875955	62.1952	0.451799	2.08711	jing
2R:6574322-6577295	76.177	57.2353	0.412451	18.9417	0.635756	18.9462	0.285889	1.00993	jing
2R:6586359-6590639	99.2879	78.3009	0.342587	20.9869	0.638975	20.9897	0.237464	1.01881	jing
2R:6608589-6612543	175.1	144.055	0.281559	31.045	0.655849	31.0462	0.195162	1.06668	jing
2R:6630601-6631159	955.006	687.348	0.474469	267.658	0.852823	267.659	0.328877	1.91612	Vha16-1
2R:6648672-6649133	35.1079	91.4799	-1.38166	56.372	0.905369	-56.3889	-0.957694	2.35777	Debcl
2R:6662497-6664598	156.686	155.713	0.008992	0.973553	0.0461535	0.973595	0.00623278	0.0472525	Dpit47,lncRNA:CR45128,Adf1
2R:6667043-6669854	91.8992	66.6131	0.464245	25.286	0.706786	25.2903	0.32179	1.22685	CG15908,CG9410,Hsepi,Adf1
2R:6696521-6698353	104.036	66.4638	0.646437	37.5718	0.810402	37.5773	0.448076	1.66285	Rab2,Mob4
2R:6707190-6711399	168.001	90.3685	0.894574	77.632	0.930289	77.6372	0.620071	2.6634	chk,mir-4975,lncRNA:CR43611,CG45092
2R:6713119-6716465	158.706	109.328	0.537694	49.378	0.828863	49.3809	0.372701	1.76529	chk,Zip42C.1,CG45092
2R:6764180-6767592	92.5114	174.525	-0.915733	82.0139	0.936771	-82.019	-0.634738	2.76099	Epac
2R:6781489-6785122	111.071	138.319	-0.31652	27.2483	0.670645	-27.2501	-0.219395	1.11062	Cyp6a2,Epac
2R:6787505-6789220	161.232	189.89	-0.236024	28.6578	0.612311	-28.6587	-0.163599	0.947551	Epac
2R:6789234-6794469	156.945	146.589	0.0984843	10.3562	0.32341	10.3567	0.0682641	0.390689	Epac
2R:6795624-6801049	144.151	159.732	-0.148073	15.5811	0.443297	-15.5818	-0.102636	0.585724	Epac
2R:6803110-6807779	101.867	113.29	-0.153328	11.4226	0.410442	-11.4236	-0.106279	0.528382	SdhB
2R:6810414-6811994	174.888	92.1019	0.925132	82.7865	0.938447	82.7916	0.641252	2.78786	ubl,CG15237,koi
2R:6819443-6821363	91.0491	84.3533	0.110199	6.69574	0.297081	6.69665	0.0763844	0.352514	lncRNA:CR44442
2R:6823270-6828818	88.2539	51.1515	0.786885	37.1024	0.816168	37.1108	0.545427	1.69373	CG15236,lncRNA:CR44442
2R:6838837-6843595	100.664	105.943	-0.073734	5.27854	0.220822	-5.27905	-0.0511085	0.249515	CG15236,CG9445,lncRNA:CR44166
2R:6854048-6858120	186.368	138.581	0.427422	47.7869	0.788074	47.7888	0.296267	1.55152
2R:6863240-6864299	150.401	103.917	0.533388	46.4846	0.819722	46.4876	0.369717	1.71325	coro
2R:6868471-6872829	126.478	94.0509	0.427376	32.4274	0.742703	32.4302	0.296234	1.35752	CG9447,asRNA:CR44169,coro
2R:6875452-6877022	47.3347	71.3181	-0.591371	23.9834	0.707098	-23.9907	-0.409907	1.22792	CG9447,asRNA:CR44169,Spn42Da
2R:6883050-6884067	32.6642	68.9264	-1.07735	36.2622	0.812905	-36.2782	-0.74676	1.67614	Spn42Dd,Spn42Dc
2R:6897818-6901399	174.952	148.537	0.236137	26.4151	0.604533	26.4161	0.163678	0.927687	CG30158
2R:6910327-6910767	68.9264	369.742	-2.42339	300.816	0.99962	-300.825	-1.67977	7.87545	CG30158
2R:6936454-6938229	210.238	194.273	0.113939	15.9652	0.369697	15.9656	0.0789765	0.461555	mim
2R:6942119-6943198	66.1433	399.951	-2.59616	333.808	0.999732	-333.818	-1.79952	8.22376	mim,CheB42b
2R:6945261-6946964	59.426	91.4715	-0.622229	32.0455	0.775133	-32.0516	-0.431296	1.49225	tRNA:Lys-CTT-1-6,tRNA:Lys-CTT-1-7,mim,CheB42c
2R:6962946-6964371	223.928	214.049	0.0650932	9.8789	0.254817	9.87912	0.0451192	0.294125	mim,CheB42c
2R:6991125-6993350	77.6576	169.94	-1.12983	92.2827	0.958786	-92.2896	-0.783138	3.18898	Tsp42Ea,CG30159
2R:6993853-6994808	35.5562	89.7753	-1.33622	54.2191	0.897144	-54.2355	-0.926195	2.27442	Tsp42Ea,CG30159
2R:7013859-7017238	129.821	65.7526	0.981408	64.0688	0.916633	64.0763	0.68026	2.4845	Tsp42Ee
2R:7028542-7031408	95.2358	70.4453	0.435002	24.7906	0.698672	24.7944	0.30152	1.19956	Tsp42Ef,Tsp42Eg
2R:7033213-7033439	45.334	85.4577	-0.914618	40.1237	0.835971	-40.1341	-0.633965	1.80771	Tsp42Eg,Tsp42Eh
2R:7056013-7057298	44.5329	97.2146	-1.1263	52.6817	0.891333	-52.6937	-0.780693	2.21946	Pgant3,Tsp42Eo,Tsp42Ep
2R:7063244-7065644	114.505	82.1158	0.479672	32.3887	0.756537	32.3922	0.332483	1.41279	Tsp42Eq,Tsp42Er
2R:7088195-7092223	44.469	69.4864	-0.643931	25.0174	0.718743	-25.0257	-0.446339	1.26849	esn
2R:7100081-7103346	160.541	112.196	0.516923	48.3451	0.820772	48.3479	0.358304	1.7191	esn
2R:7105879-7107570	41.1181	90.6392	-1.14036	49.5211	0.880023	-49.5342	-0.790439	2.12046	esn
2R:7110777-7111895	53.1969	137.034	-1.36512	83.8374	0.959009	-83.8486	-0.946231	3.19441	esn
2R:7112851-7116198	70.9168	96.7137	-0.447593	25.7969	0.708887	-25.8008	-0.310248	1.23404	esn
2R:7134209-7137218	204.491	206.232	-0.0122267	1.7404	0.0531045	-1.74045	-0.00847488	0.0545665	lncRNA:CR44443
2R:7141549-7143104	156.102	131.181	0.250931	24.9211	0.608779	24.9224	0.173932	0.938483
2R:7145344-7146180	42.0015	103.203	-1.29697	61.2015	0.918421	-61.2152	-0.898992	2.50619
2R:7155401-7156850	36.2031	61.0369	-0.753568	24.8338	0.718318	-24.8452	-0.522334	1.26698	nec,pk,Spn43Ad
2R:7159233-7162076	64.7731	58.6562	0.143112	6.11693	0.304188	6.1186	0.0991975	0.362676	nec,pk
2R:7168961-7172207	118.661	76.7286	0.629013	41.9327	0.825913	41.9374	0.435999	1.7482	pk
2R:7188217-7189748	171.496	159.705	0.102763	11.7907	0.331836	11.7911	0.0712298	0.403221	pk
2R:7193876-7196006	39.7481	97.2456	-1.29074	57.4974	0.908609	-57.5119	-0.894676	2.39261	pk
2R:7240855-7243874	167.733	154.426	0.119258	13.3077	0.379017	13.3083	0.0826631	0.476452	Adk3
2R:7245083-7252206	92.4176	90.4267	0.0314193	1.99093	0.0973805	1.99118	0.0217782	0.102454	Adk3,Gadd45
2R:7253774-7255701	405.278	322.51	0.32957	82.7686	0.756023	82.7693	0.228441	1.41068	lncRNA:CR45280
2R:7281411-7284539	35.8467	65.5527	-0.870815	29.706	0.764651	-29.7187	-0.603603	1.44668	pwn,Incenp
2R:7291106-7292431	33.2677	94.7818	-1.51049	61.5141	0.91965	-61.5327	-1.04699	2.52137	pwn
2R:7294580-7295332	76.1226	192.781	-1.34056	116.658	0.978477	-116.666	-0.929207	3.83861	pwn
2R:7304699-7306329	38.6023	103.965	-1.42935	65.3632	0.928792	-65.3788	-0.990748	2.64215
2R:7308772-7309310	34.7646	81.8626	-1.23559	47.098	0.870547	-47.1142	-0.856443	2.04444
2R:7311488-7312577	39.045	91.3954	-1.22698	52.3504	0.890617	-52.3648	-0.85048	2.2129	CG12164
2R:7372906-7375968	121.527	98.8752	0.297594	22.6516	0.632135	22.6536	0.206277	1.00004	Dscam1
2R:7379427-7381872	386.317	401.905	-0.0570707	15.5884	0.235394	-15.5885	-0.0395584	0.268395	cos,Dscam1
2R:7394593-7396429	114.405	153.501	-0.424103	39.0964	0.763913	-39.0987	-0.293966	1.44356	Eaf,asRNA:CR44201,Glo1
2R:7403687-7407942	66.3757	78.4855	-0.24177	12.1098	0.485226	-12.1122	-0.167582	0.664028	Eaf,CG1701,CG43123,CG43267,mir-4977
2R:7422732-7424438	40.3588	93.7591	-1.21608	53.4004	0.894529	-53.4142	-0.84292	2.24932	so,lncRNA:CR44202
2R:7429748-7430839	42.6267	84.1349	-0.980947	41.5082	0.843324	-41.5198	-0.67994	1.85357	so,lncRNA:CR44203,lncRNA:CR44204
2R:7430942-7432421	36.9396	90.1448	-1.28708	53.2052	0.893836	-53.2207	-0.892133	2.24277	so,lncRNA:CR44203,lncRNA:CR44204
2R:7471851-7475840	108.662	113.631	-0.0645182	4.96971	0.199276	-4.97013	-0.0447206	0.222239	Aldh-III
2R:7476151-7478615	92.2135	93.449	-0.0192006	1.23546	0.0661794	-1.23561	-0.0133088	0.068471	Aldh-III,wech
2R:7487381-7491196	137.703	108.43	0.344797	29.273	0.691341	29.275	0.238995	1.17552	wech,Coop
2R:7493276-7493912	48.6885	174.264	-1.83962	125.576	0.988043	-125.589	-1.27513	4.4264	CG1620,Coop,asRNA:CR43723
2R:7500212-7501284	141.346	131.09	0.108672	10.2558	0.341849	10.2564	0.0753254	0.418321	dpa,didum
2R:7531758-7533011	138.702	84.1956	0.720172	54.5064	0.873899	54.5111	0.499185	2.07067	Drat,Cyt-b5,lncRNA:CR44209
2R:7533274-7534646	187.137	185.719	0.0109673	1.41721	0.05116	1.41725	0.00760197	0.0525151	Drat,Cyt-b5,lncRNA:CR44209
2R:7539174-7540485	48.5638	68.4011	-0.494137	19.8373	0.654508	-19.8434	-0.34251	1.06279	Gpo2,CG1598,Corin
2R:7547721-7550734	249.867	274.156	-0.133838	24.2893	0.431228	-24.2897	-0.0927698	0.564276	Corin
2R:7551938-7554611	301.337	333.794	-0.147577	32.4564	0.48364	-32.4567	-0.102293	0.66095	Corin
2R:7562176-7562766	35.7321	93.4423	-1.38686	57.7102	0.90928	-57.7269	-0.961296	2.39998	Corin
2R:7564163-7565303	29.9413	70.6655	-1.23887	40.7242	0.839658	-40.7431	-0.85872	1.83045	boca,Corin,Rpe
2R:7585395-7588132	159.075	117.688	0.434739	41.387	0.774083	41.3893	0.301338	1.48759	blow,CG1360
2R:7603171-7604384	185.134	405.042	-1.1295	219.908	0.977717	-219.911	-0.782912	3.80392	HisT
2R:7614518-7621481	93.9092	75.5325	0.314169	18.3767	0.602365	18.3794	0.217766	0.92222	HisT,lncRNA:CR44444
2R:7633012-7634296	36.3299	63.619	-0.808302	27.2892	0.742948	-27.3011	-0.560273	1.35848	CG43341,M7BP,asRNA:CR45131
2R:7655061-7655653	72.0184	137.848	-0.936643	65.8299	0.917371	-65.8365	-0.649232	2.49339	CG17985,CG30491
2R:7673934-7674986	113.012	96.8888	0.22208	16.1237	0.526195	16.1252	0.153934	0.746959	mRpL52,CG12107,U2A
2R:7676394-7678236	154.046	104.42	0.560959	49.6256	0.834831	49.6288	0.388827	1.80078	U2A,LRR
2R:7689587-7694799	150.932	179.536	-0.250373	28.6039	0.622815	-28.605	-0.173545	0.97502	LRR
2R:7696139-7699814	80.5316	71.1816	0.178052	9.35008	0.403066	9.35177	0.123416	0.51595	LRR,Coq9,CG30496
2R:7718558-7721614	302.422	204.325	0.565699	98.0971	0.882459	98.0988	0.392113	2.14097	Gdap2
2R:7730189-7734058	332.437	256.017	0.376844	76.4205	0.790644	76.4214	0.261208	1.56372	Gdap2
2R:7741758-7748034	79.8678	94.6429	-0.24488	14.7751	0.525815	-14.7771	-0.169738	0.746157	CG46385
2R:7750069-7750628	89.6039	157.446	-0.813222	67.8419	0.909258	-67.8468	-0.563682	2.39973	CG46385
2R:7754526-7756858	143.666	130.769	0.135703	12.8974	0.410084	12.8981	0.0940618	0.527776	CG46385
2R:7757594-7760212	142.739	159.612	-0.161187	16.8728	0.464843	-16.8735	-0.111726	0.625195	CG46385
2R:7764163-7767600	79.2047	98.9525	-0.32115	19.7478	0.61991	-19.7504	-0.222604	0.967346	CG46385
2R:7767936-7768871	41.6179	130.498	-1.64875	88.8801	0.966452	-88.8954	-1.14283	3.39478	CG46385
2R:7781604-7782563	55.8399	96.3442	-0.786901	40.5043	0.83416	-40.5119	-0.545438	1.79673	cn,asRNA:CR45108,CG46385
2R:7806039-7807084	322.333	340.428	-0.0787956	18.0945	0.297372	-18.0947	-0.054617	0.352927	sax,Nop17l
2R:7892935-7893849	41.6232	101.43	-1.28503	59.8068	0.914711	-59.8206	-0.890712	2.46171	CG30377
2R:7898125-7901327	41.579	89.0533	-1.09881	47.4743	0.871485	-47.487	-0.76164	2.05171	CG30377
2R:7901740-7904112	44.4682	160.128	-1.84838	115.66	0.984668	-115.675	-1.2812	4.17779	CG30377
2R:7908116-7909205	318.762	233.152	0.451205	85.6092	0.832193	85.6104	0.312751	1.78494	CG30377
2R:7911602-7913258	49.4749	129.294	-1.38589	79.8195	0.954539	-79.8315	-0.960627	3.09091	CG30377
2R:7914838-7918411	79.3747	66.1395	0.263168	13.2352	0.513522	13.2379	0.182414	0.720564	Cul1,CG12159,CG30377
2R:7949290-7949922	101.433	157.941	-0.638857	56.5078	0.865518	-56.5114	-0.442822	2.00632	CG14764,azot,CG30378
2R:7953993-7955110	193.396	187.386	0.045541	6.0095	0.186581	6.00967	0.0315666	0.206509	CG14764
2R:7959378-7961090	54.5483	79.9796	-0.5521	25.4314	0.719011	-25.4374	-0.382686	1.26944	Septin5,CG2915
2R:7964945-7966200	399.367	405.93	-0.023516	6.56303	0.0938492	-6.56307	-0.0163	0.0985495	nito,CG14763
2R:7981107-7982844	144.832	106.785	0.439667	38.0467	0.768361	38.0492	0.304754	1.46257	ACC
2R:7983218-7987042	115.61	150.812	-0.38349	35.2025	0.734209	-35.2046	-0.265815	1.32505	ACC
2R:7989381-7989698	445.214	371.946	0.259406	73.2681	0.679675	73.2686	0.179807	1.13842	ACC,Nup44A
2R:8001164-8004102	150.585	87.5258	0.782801	63.0595	0.898172	63.0644	0.542596	2.28447	Odc1,CG11191
2R:8030259-8031721	42.6354	74.7579	-0.810175	32.1225	0.782978	-32.1327	-0.56157	1.52776	Optix,lncRNA:CR43724
2R:8032299-8034056	42.1001	64.1319	-0.607221	22.0319	0.686715	-22.0402	-0.420893	1.16064	Optix
2R:8034900-8035654	41.8721	78.2871	-0.902784	36.4149	0.81362	-36.4261	-0.625762	1.67997	Optix
2R:8062021-8065135	367.521	405.718	-0.142652	38.1975	0.463837	-38.1977	-0.0988791	0.623317	CG12769
2R:8067961-8069718	363.118	293.444	0.307354	69.6743	0.732891	69.675	0.213042	1.3201	lig,CG17977
2R:8098102-8099693	184.96	127.494	0.536783	57.4658	0.843011	57.4683	0.37207	1.85158	uno,Tmem63
2R:8101165-8102701	270.304	207.744	0.379778	62.5602	0.78148	62.5613	0.263242	1.52088	Tmem63,Cul4
2R:8126787-8127682	211.527	87.909	1.26676	123.618	0.977806	123.624	0.87805	3.80794	coil,Socs44A
2R:8139829-8140878	131.235	149.796	-0.190851	18.5614	0.51388	-18.5624	-0.132288	0.721299	Lpin
2R:8145688-8146532	119.436	237.892	-0.994067	118.456	0.959345	-118.46	-0.689035	3.20263	kermit,Lpin
2R:8148382-8149955	57.3526	125.717	-1.13224	68.364	0.931407	-68.3733	-0.784812	2.67956	kermit,Lpin
2R:8152285-8156443	170.756	161.327	0.081955	9.42976	0.277234	9.43012	0.0568069	0.32467	kermit,CR30374,Lpin,lncRNA:CR44068
2R:8173763-8176502	203.314	160.701	0.339328	42.6128	0.730298	42.6142	0.235205	1.31044	CG14757,LRP1
2R:8181784-8183566	123.67	78.3882	0.657789	45.282	0.841558	45.2868	0.455945	1.84237	LRP1
2R:8191605-8194203	438.883	383.612	0.194186	55.2702	0.569867	55.2705	0.134599	0.843661	LRP1
2R:8195952-8198253	218.47	180.614	0.274528	37.8564	0.663918	37.8574	0.190289	1.0904	LRP1
2R:8201621-8208165	95.2948	77.8406	0.291874	17.4542	0.583143	17.4566	0.202312	0.875013	CG14756,LRP1
2R:8225773-8228207	101.661	52.2295	0.960836	49.432	0.876984	49.4413	0.666001	2.09544	dpn,LRP1,CG34217
2R:8235869-8238334	103.37	90.2986	0.195036	13.071	0.476309	13.0724	0.135189	0.646853	pnut
2R:8240123-8241564	531.945	623.566	-0.229263	91.6203	0.640092	-91.6206	-0.158913	1.02191	pnut,lncRNA:CR44276,lncRNA:CR44445
2R:8241977-8242691	126.041	196.232	-0.63867	70.1914	0.883711	-70.1943	-0.442693	2.15168	lncRNA:CR44276,lncRNA:CR44445
2R:8242706-8245125	297.733	226.993	0.391372	70.74	0.793214	70.7411	0.271278	1.57607	lncRNA:CR44276,lncRNA:CR44445,lncRNA:CR44446
2R:8245257-8247268	105.694	61.1955	0.788394	44.4984	0.850901	44.5054	0.546473	1.90314	lncRNA:CR44446
2R:8247659-8250780	68.6223	77.9069	-0.183073	9.28459	0.401502	-9.2864	-0.126897	0.513332	CG44439
2R:8261075-8263348	149.07	180.18	-0.273452	31.1104	0.647982	-31.1116	-0.189542	1.04407	CG14759,CG2291,CG12126,CG30376
2R:8282958-8286812	40.6548	174.872	-2.1048	134.217	0.990926	-134.234	-1.45894	4.70231
2R:8455187-8456214	46.3597	104.155	-1.16779	57.7953	0.908766	-57.8071	-0.80945	2.39433	Mal-A2,Mal-A3
2R:8461984-8463371	42.3281	70.46	-0.73519	28.132	0.75086	-28.1416	-0.509595	1.38974	Mal-A5
2R:8472106-8472587	51.9275	89.79	-0.790056	37.8625	0.820482	-37.8708	-0.547625	1.71748	Mal-A7,Mal-A8
2R:8481253-8482494	48.5307	192	-1.98414	143.47	0.992311	-143.483	-1.3753	4.86803	mtt
2R:8482783-8483723	198.473	211.388	-0.0909501	12.9149	0.313978	-12.9152	-0.0630418	0.376845	mtt
2R:8507177-8512788	79.4133	57.7094	0.460574	21.7039	0.673372	21.7088	0.319245	1.11893	mtt
2R:8527777-8532261	99.1288	77.6647	0.352046	21.4641	0.646171	21.467	0.24402	1.03894	mtt
2R:8552122-8553268	55.716	86.0782	-0.627557	30.3622	0.764382	-30.3687	-0.434989	1.44555	CG12780
2R:8579275-8579876	40.1724	123.667	-1.62218	83.4944	0.960485	-83.5101	-1.12441	3.23106	CG42326
2R:8590764-8591557	41.1108	75.2377	-0.871937	34.1269	0.797908	-34.138	-0.604381	1.59903	CG14752,CG43183
2R:8593449-8593781	42.0027	110.994	-1.40193	68.9915	0.936726	-69.0057	-0.971744	2.76028	CG8736,CG43183
2R:8594732-8595755	32.388	127.014	-1.97146	94.6261	0.972129	-94.6466	-1.36651	3.58017	CG8736
2R:8602314-8604633	70.4237	103.313	-0.552888	32.8893	0.772987	-32.8939	-0.383233	1.48275	rgr
2R:8605735-8609183	73.3468	86.1324	-0.231821	12.7856	0.491529	-12.7877	-0.160686	0.676348	rgr
2R:8624709-8625678	174.326	159.902	0.124602	14.4242	0.384024	14.4248	0.0863676	0.484547	Vps25,Cirl,beta3GalTII
2R:8632253-8632922	45.2676	62.5839	-0.467313	17.3163	0.617362	-17.3226	-0.323917	0.960665	CG8635
2R:8636936-8638362	45.5972	90.6495	-0.991354	45.0523	0.860489	-45.0632	-0.687154	1.96961
2R:8641428-8643769	43.4951	124.349	-1.51547	80.8537	0.956774	-80.8679	-1.05044	3.14132
2R:8646964-8653201	91.5334	90.4667	0.0169118	1.06672	0.0612176	1.06686	0.0117224	0.0631716	ptc,lncRNA:CR44281
2R:8657082-8659015	173.185	170.371	0.0236375	2.8144	0.0866971	2.8145	0.0163843	0.0906876	ptc
2R:8665530-8674821	113.588	90.3164	0.330752	23.2717	0.653033	23.2741	0.22926	1.05853	ptc,Acsl
2R:8721670-8723420	219.117	179.16	0.290448	39.9564	0.686268	39.9574	0.201323	1.15922	gcl,CG14767,CG30357
2R:8725793-8727017	386.673	232.317	0.735017	154.356	0.932278	154.358	0.509475	2.69235	gcl,snoRNA:gcl-a
2R:8734923-8736572	45.5422	87.3315	-0.939299	41.7893	0.844576	-41.7999	-0.651072	1.8616	CG8740,stmA,CG42615
2R:8739256-8740265	37.3366	93.7096	-1.32761	56.373	0.905324	-56.3886	-0.920226	2.35729	CG8740
2R:8741223-8741481	41.5776	59.2886	-0.511948	17.711	0.625475	-17.7184	-0.354855	0.982097	CG8740
2R:8744935-8748436	66.6981	169.882	-1.34882	103.184	0.972956	-103.193	-0.934928	3.61029	CG8740,lncRNA:CR44277
2R:8750726-8752481	42.6005	84.6788	-0.991129	42.0783	0.846386	-42.0899	-0.686998	1.87331	CG8740
2R:8823669-8826008	157.81	117.956	0.419936	39.8537	0.766081	39.856	0.291078	1.45278	sns,CG30350
2R:8845593-8847218	183.708	181.422	0.0180652	2.28602	0.0830763	2.28609	0.0125218	0.086731	sns
2R:8860859-8862052	160.357	145.811	0.137186	14.5458	0.420366	14.5465	0.0950901	0.545358	RyR
2R:8865058-8865974	44.3499	62.3288	-0.490968	17.9789	0.62876	-17.9856	-0.340313	0.990908	RyR
2R:8891064-8892359	121.156	56.9681	1.08864	64.1879	0.922221	64.1971	0.754587	2.55388	DCTN2-p50,CG8272
2R:8893314-8894595	72.3577	73.0853	-0.0144351	0.727622	0.0400966	-0.727765	-0.0100057	0.0409226	DCTN2-p50,Sec31
2R:8912980-8914011	167.509	79.485	1.07548	88.024	0.952796	88.0306	0.745469	3.05328	lin,Pgi
2R:8919736-8921624	132.204	90.8962	0.540476	41.308	0.807608	41.3115	0.37463	1.64822	CG8248,Spt,CG34219
2R:8928004-8928936	258.603	86.247	1.58419	172.356	0.99211	172.363	1.09808	4.8422	AIMP1,PAN2
2R:8940704-8942185	40.6113	76.3033	-0.909863	35.692	0.808681	-35.7036	-0.630669	1.65381	FANCI,CG13748,lncRNA:CR44273
2R:8947331-8951121	75.6396	48.5913	0.638443	27.0483	0.737897	27.0558	0.442535	1.33902	CG8230,CG8229,Tom7,CG33199
2R:8952081-8959266	98.1387	89.9957	0.124967	8.14305	0.332037	8.14401	0.0866204	0.403523	babo,CG8229,Tom7,CG33199
2R:8967336-8968743	114.569	106.908	0.0998484	7.66114	0.29954	7.66179	0.0692097	0.356017	spab,flz
2R:8976280-8979006	110.29	122.503	-0.151516	12.2131	0.418041	-12.214	-0.105023	0.541356	flz
2R:8979033-8980108	39.2416	94.1225	-1.26216	54.8809	0.899893	-54.8954	-0.87486	2.30151	flz
2R:8981529-8984882	39.479	88.8066	-1.16958	49.3276	0.87942	-49.3415	-0.810692	2.11544	flz
2R:8990081-8991003	45.5795	72.998	-0.679474	27.4186	0.74268	-27.427	-0.470975	1.35744
2R:9030519-9033211	39.2159	67.1707	-0.776393	27.9548	0.749341	-27.9656	-0.538154	1.38366	CG8170
2R:9069532-9070826	80.2306	118.788	-0.56616	38.557	0.804256	-38.5612	-0.392432	1.63095	ana
2R:9092072-9092764	228.837	207.377	0.142062	21.4596	0.445912	21.4601	0.0984699	0.590432	Nadk2,Boot
2R:9109315-9110610	42.856	59.058	-0.462637	16.2021	0.598744	-16.2087	-0.320676	0.913155	Pgm2a,tsu,Mys45A
2R:9125941-9126754	200.002	169.381	0.239743	30.6211	0.617071	30.622	0.166177	0.959906	CG18659
2R:9131493-9134325	159.364	79.5217	1.0029	79.842	0.941241	79.8483	0.695159	2.83431	CG18659,Hydr1
2R:9136961-9137751	393.463	332.336	0.243584	61.1266	0.649882	61.1271	0.168839	1.04948	CG8788,alc,CG44286
2R:9140548-9141498	43.1186	76.8619	-0.833959	33.7433	0.795449	-33.7536	-0.578056	1.58694	CG8788,shrb,CG44286
2R:9164697-9165831	252.856	249.743	0.017872	3.11303	0.0880157	3.11309	0.0123879	0.0921325	CG8046,Rad51D,CG42382
2R:9185553-9186570	79.2417	89.92	-0.182384	10.6784	0.426847	-10.6799	-0.126419	0.556603	Rab32,CG8026,CG45085
2R:9189098-9191419	106.496	119.01	-0.160285	12.5141	0.43277	-12.5151	-0.111101	0.566991	CG8026,CG45085
2R:9206694-9209786	81.4132	44.7776	0.862485	36.6356	0.814581	36.6458	0.597829	1.68514	Gnptab,VhaAC45
2R:9231459-9232973	67.11	93.9262	-0.484999	26.8161	0.721514	-26.8205	-0.336176	1.27839	hig
2R:9265662-9266022	40.1625	74.2303	-0.886159	34.0678	0.797617	-34.0793	-0.614239	1.5976	Pkn
2R:9269059-9273017	168.19	228.405	-0.441496	60.2142	0.810089	-60.2158	-0.306022	1.6612	Pkn
2R:9275176-9280136	130.962	115.482	0.181474	15.4795	0.481583	15.4806	0.125788	0.656976	Pkn
2R:9292937-9295858	336.103	299.853	0.164646	36.2496	0.505722	36.25	0.114124	0.704657	Drep2
2R:9337028-9341017	487.981	480.023	0.023722	7.95817	0.0943185	7.95821	0.0164428	0.0990676	CG13739,CG13954
2R:9366555-9370090	123.01	126.859	-0.0444428	3.84835	0.144294	-3.84861	-0.0308054	0.155828	CG13954
2R:9374096-9376985	329.719	480.014	-0.541842	150.296	0.88056	-150.297	-0.375576	2.12494	CG13954
2R:9381592-9390875	81.4451	67.989	0.260527	13.4561	0.516539	13.4586	0.180583	0.726785	l(2)03659,CG13954
2R:9412872-9415331	84.0089	102.225	-0.283131	18.2159	0.586831	-18.2181	-0.196251	0.883899	wun,wun2
2R:9422378-9422833	120.577	91.2158	0.402595	29.3608	0.718385	29.3636	0.279057	1.26722	CG13955
2R:9429475-9431293	433.601	323.419	0.422962	110.182	0.822002	110.182	0.293175	1.72598	Pdk
2R:9438745-9443024	145.736	166.127	-0.188932	20.3913	0.522842	-20.3921	-0.130958	0.739908	ced-6
2R:9443062-9444679	161.717	122.946	0.395444	38.7708	0.754593	38.7728	0.274101	1.40484	ced-6,lncRNA:CR45321
2R:9493916-9494939	38.1444	66.9039	-0.810621	28.7596	0.756537	-28.771	-0.56188	1.41279	Wnt2
2R:9501081-9501275	40.7767	60.5964	-0.571488	19.8197	0.657928	-19.828	-0.396125	1.07273	Wnt2
2R:9504035-9508452	238.658	255.059	-0.0958828	16.4004	0.346721	-16.4007	-0.0664609	0.425751	Wnt2,brp
2R:9510976-9516692	269.232	192.477	0.484166	76.7552	0.84205	76.7567	0.335598	1.84548	brp
2R:9519066-9522670	131.959	126.717	0.0584739	5.24148	0.202941	5.24181	0.040531	0.226827	brp
2R:9528571-9532067	140.977	91.1881	0.628542	49.7889	0.849224	49.7929	0.435672	1.89196	brp
2R:9541032-9545355	141.509	252.612	-0.836034	111.104	0.941755	-111.107	-0.579495	2.8431	CG1888,brp
2R:9546263-9547610	177.64	107.925	0.718925	69.7148	0.899088	69.7185	0.498321	2.29351	CG1888
2R:9548678-9550671	332.332	313.177	0.0856476	19.1551	0.326472	19.1553	0.0593664	0.395225	CG1888
2R:9556236-9558253	569.239	648.49	-0.18805	79.251	0.573063	-79.2513	-0.130346	0.85112
2R:9564534-9567248	102.048	80.9112	0.334832	21.1365	0.636449	21.1392	0.232088	1.01184	Alp6,Not1,asRNA:CR45281
2R:9577246-9579770	186.605	148.127	0.333159	38.4787	0.715189	38.4801	0.230928	1.25593	Nt5c,Not1,lncRNA:CR46257
2R:9579888-9582039	392.994	430.24	-0.130634	37.2458	0.441062	-37.2461	-0.0905484	0.581717	Nt5c,Smyd4-1,Not1,lncRNA:CR46257
2R:9605185-9608375	106.324	65.7289	0.693865	40.5949	0.82779	40.6008	0.48095	1.75904	CG1902,CG12926,GstT1,GstT2,lncRNA:CR44285
2R:9609285-9610624	261.051	177.31	0.558055	83.7407	0.87419	83.7426	0.386814	2.07298	CG12926,Mmp2,GstT2,asRNA:CR44069
2R:9613693-9618362	116.096	54.2618	1.09731	61.8344	0.917281	61.8442	0.760599	2.49231	Mmp2,asRNA:CR44069
2R:9618648-9625420	104.808	65.9219	0.668913	38.8857	0.818448	38.8914	0.463655	1.70621	Mmp2,mir-307b,mir-307a
2R:9626986-9636795	133.805	81.6397	0.712786	52.165	0.867105	52.1698	0.494065	2.01819	Mmp2,lncRNA:CR44070
2R:9638893-9644706	170.145	135.297	0.330631	34.8477	0.705355	34.8492	0.229176	1.22198	Mmp2
2R:9648378-9652369	292	258.607	0.175206	33.3928	0.539448	33.3933	0.121443	0.77533	Mmp2
2R:9657376-9663995	112.332	86.2128	0.381792	26.1189	0.692213	26.1217	0.264638	1.17835	tRNA:iMet-CAT-2-1,Mmp2
2R:9664216-9668520	190.238	119.667	0.668786	70.5716	0.89026	70.5747	0.463567	2.20964	Mmp2
2R:9671702-9677485	91.7189	77.7284	0.238776	13.9904	0.515556	13.9925	0.165507	0.724753	Mmp2
2R:9677648-9679048	162.836	116.781	0.479612	46.0547	0.804032	46.0572	0.332442	1.6298	Mmp2
2R:9681089-9683953	210.435	206.029	0.0305211	4.40511	0.122748	4.40522	0.0211556	0.130961	Mmp2
2R:9709867-9710605	285.008	209.019	0.447373	75.9898	0.827925	75.9911	0.310095	1.75982	lncRNA:CR44292
2R:9710745-9712973	93.5942	79.1672	0.241516	14.427	0.521121	14.429	0.167406	0.736308	dap,lncRNA:CR44292
2R:9718383-9721038	124.154	52.1194	1.25224	72.0348	0.940459	72.0457	0.867987	2.82108	sqa
2R:9739441-9741122	261.104	215.446	0.277297	45.6579	0.684994	45.6588	0.192208	1.15516	sqa
2R:9755781-9757641	66.0328	62.7877	0.0727002	3.24507	0.17259	3.24588	0.0503919	0.189454	trpl,CG1690
2R:9759778-9761518	270.775	325.827	-0.267012	55.052	0.683251	-55.0527	-0.185078	1.14964	trpl
2R:9761716-9763099	158.345	119.211	0.409547	39.1333	0.760181	39.1355	0.283876	1.42787	trpl
2R:9768839-9770751	78.7904	41.0111	0.942005	37.7793	0.822382	37.791	0.652948	1.72812	CG1688
2R:9775368-9779323	154.656	87.3879	0.823554	67.2678	0.909481	67.2728	0.570844	2.4022	CG1688,asRNA:CR44207
2R:9783303-9788018	261.642	169.96	0.622401	91.6824	0.89359	91.6846	0.431416	2.24045	CG1688,lncRNA:CR44208
2R:9788974-9792566	171.679	131.193	0.388028	40.4866	0.754459	40.4884	0.26896	1.40429	CG1688,CG1698,lncRNA:CR44208
2R:9797472-9800095	93.9552	64.7891	0.536222	29.1661	0.748022	29.171	0.371681	1.37841	CG1688,CG1698
2R:9805423-9808190	187.109	150.403	0.315047	36.7062	0.703813	36.7075	0.218374	1.21676	CG1688
2R:9835763-9836553	26.2406	152.732	-2.54113	126.491	0.988981	-126.517	-1.76138	4.50816	hebe,CG1663
2R:9841944-9842811	135.926	53.9663	1.33269	81.9594	0.956283	81.9702	0.923748	3.13001	Marc,Sting,Vamp7
2R:9856573-9858695	156.895	159.636	-0.0249867	2.74101	0.0863395	-2.74112	-0.0173195	0.0902962	PCB
2R:9859609-9860927	230.173	256.695	-0.157333	26.5214	0.494926	-26.5219	-0.109055	0.683051	PCB,asRNA:CR44293
2R:9885712-9887771	287.298	187.489	0.615741	99.809	0.89616	99.8109	0.426799	2.26491	CG12923,CG1513
2R:9901364-9904175	37.3533	135.797	-1.86214	98.4432	0.975035	-98.4609	-1.29074	3.69027	CG1441
2R:9908624-9909305	591.12	628.636	-0.0887743	37.5162	0.333937	-37.5163	-0.0615336	0.406371	FMRFa
2R:9924725-9926053	43.6557	63.8216	-0.547874	20.1659	0.661861	-20.1733	-0.379757	1.0843	Mef2
2R:9929505-9930928	384.529	341.181	0.172553	43.3476	0.5291	43.3479	0.119605	0.75311	Mef2
2R:9938772-9943231	180.837	149.413	0.275381	31.4236	0.657212	31.4248	0.190879	1.07064	Mef2
2R:9952806-9953609	48.2254	130.882	-1.44041	82.657	0.958741	-82.6696	-0.998414	3.18789	Mef2
2R:9957957-9958781	232.415	157.48	0.561534	74.935	0.868446	74.9371	0.389226	2.02834	Mef2,Pdrg1,Pal1
2R:9959506-9961181	130.989	121.16	0.112527	9.82858	0.338429	9.82923	0.077998	0.413138	Mef2,Pdrg1,Pal1
2R:9970181-9971552	99.704	52.3145	0.930441	47.3895	0.868781	47.3986	0.644932	2.03089	eIF3j,CG12134
2R:9999857-10002259	134.995	100.477	0.426047	34.5185	0.751777	34.5211	0.295313	1.39343	Pka-R2
2R:10004056-10005203	376.286	487.355	-0.373145	111.069	0.791471	-111.07	-0.258645	1.56768	Pka-R2
2R:10010115-10015345	140.417	90.8519	0.628132	49.5654	0.848733	49.5694	0.435388	1.88871	Pka-R2,mir-4967
2R:10024266-10025861	317.534	257.396	0.302922	60.138	0.716888	60.1388	0.20997	1.26191	Pka-R2,CG12128,lncRNA:CR44294
2R:10032515-10033830	100.919	76.0335	0.408492	24.8856	0.693129	24.8889	0.283145	1.18133	CG1407,CG12129,oys
2R:10039643-10040495	53.0522	119.663	-1.17349	66.6109	0.929082	-66.6212	-0.813404	2.64624	oys,CG34220
2R:10055474-10056858	297.754	282.615	0.0752841	15.1392	0.293237	15.1394	0.0521829	0.34706	Def,magu
2R:10076301-10077369	39.0119	81.8888	-1.06975	42.8768	0.851258	-42.8902	-0.741494	1.90554	CG1371,egr
2R:10077449-10078992	45.7188	127.942	-1.48463	82.2235	0.958473	-82.2369	-1.02907	3.18141	egr
2R:10087286-10090273	152.398	114.206	0.416212	38.1926	0.760941	38.1949	0.288496	1.43104	sut4,CG2269
2R:10123780-10126017	126.772	117.754	0.106462	9.01812	0.330338	9.01875	0.0737937	0.400983	gem,CG46319
2R:10132336-10134707	42.6273	92.1118	-1.11161	49.4845	0.879755	-49.497	-0.770509	2.11822	gem,CG46319
2R:10158096-10160942	288.321	262.261	0.136673	26.0601	0.454472	26.0605	0.0947346	0.606002	KCNQ,mlt
2R:10164314-10167513	325.836	333.263	-0.0325146	7.42688	0.129677	-7.42695	-0.0225374	0.138891	KCNQ
2R:10173876-10175343	286.893	481.275	-0.74635	194.382	0.93534	-194.384	-0.517331	2.73862	KCNQ
2R:10189881-10192288	131.019	90.2615	0.537594	40.7576	0.805708	40.7611	0.372632	1.63839	KCNQ
2R:10195588-10198990	108.953	108.221	0.00972164	0.731715	0.0400966	0.731779	0.00673852	0.0409226	CG34221
2R:10200994-10205111	126.432	80.4909	0.651462	45.9409	0.842385	45.9455	0.451559	1.8476	Hr3,CG12912,CG46321
2R:10209668-10219259	89.2474	72.6674	0.296503	16.5801	0.576908	16.5827	0.20552	0.860165	Hr3,CG12912,CG46321,lncRNA:CR46322
2R:10221627-10224084	166.688	137.411	0.278651	29.2769	0.650843	29.2782	0.193146	1.05223	Hr3,CG12912,CG46321
2R:10226420-10234170	192.312	121.998	0.656591	70.3138	0.888092	70.3169	0.455114	2.19008	Hr3,CG12912,CG46321
2R:10237284-10238455	41.1067	84.2077	-1.03458	43.101	0.852376	-43.1134	-0.717115	1.91309	Hr3,Hdc,lncRNA:CR45265
2R:10246581-10246847	42.0284	61.3964	-0.546788	19.368	0.651491	-19.3757	-0.379005	1.05409	Hdc,CG12209,CG12914
2R:10269904-10272404	100.852	122.844	-0.284591	21.9923	0.615931	-21.9941	-0.197263	0.956934	CG12910,CAP
2R:10275702-10278081	187.44	166.925	0.16723	20.5151	0.495262	20.5158	0.115915	0.683715	CAP
2R:10300490-10304442	99.7628	72.2572	0.465361	27.5056	0.725269	27.5095	0.322563	1.29196	CAP
2R:10323199-10323861	207.027	207.87	-0.00586279	0.843023	0.0430692	-0.843043	-0.00406378	0.0440241	SLO2
2R:10337965-10343234	93.9428	136.726	-0.541436	42.7835	0.812302	-42.7869	-0.375295	1.67292	SLO2
2R:10383316-10389000	128.323	131.273	-0.0327948	2.9504	0.113316	-2.95058	-0.0227316	0.120267	SLO2
2R:10395462-10398323	253.795	143.515	0.822459	110.28	0.938738	110.283	0.570085	2.79259	SLO2
2R:10402793-10410522	110.04	76.551	0.52353	33.4886	0.770574	33.4927	0.362883	1.47217	CG12898,CG33475,CG33476,CG33477,SLO2,CR43177
2R:10411286-10416661	132.662	78.1553	0.763341	54.5068	0.878928	54.5121	0.529107	2.11137	CG33475,CG33476,SLO2
2R:10421082-10422088	41.1211	154.282	-1.90762	113.161	0.983505	-113.177	-1.32226	4.10472	CG11825,CG33474
2R:10423257-10424397	41.4448	115.203	-1.47492	73.7586	0.94542	-73.7734	-1.02234	2.9081	CG11825,Prx6b,CG33474
2R:10428709-10430851	92.6317	99.3375	-0.100832	6.70575	0.285772	-6.70651	-0.0698912	0.336553	CG12896,RanBPM
2R:10437150-10441020	86.5985	65.9812	0.392287	20.6173	0.650306	20.6211	0.271913	1.0507	Galphao,CG12895,RanBPM
2R:10442014-10449799	87.946	84.1222	0.0641308	3.82377	0.179719	3.82431	0.0444521	0.198109	Galphao,Cyp49a1
2R:10453620-10456550	76.848	56.8053	0.435981	20.0427	0.652027	20.0474	0.302199	1.05563	Galphao,Cyp49a1
2R:10474831-10479185	77.0479	78.6834	-0.0303035	1.63549	0.0875911	-1.63577	-0.0210048	0.091667	trsn,CG17765,whd,asRNA:CR45134
2R:10484130-10486750	91.1827	52.8294	0.787418	38.3533	0.823052	38.3614	0.545797	1.7319	pre-lola-G,lola
2R:10519088-10520867	73.1305	34.3102	1.09183	38.8203	0.829154	38.8356	0.756802	1.76699	lola
2R:10524494-10525707	81.4748	56.0257	0.540266	25.4491	0.718229	25.4549	0.374484	1.26666	lola
2R:10526228-10531136	138.342	59.747	1.2113	78.5952	0.949712	78.6045	0.839611	2.98998	lola
2R:10534973-10536768	590.57	476.959	0.308242	113.611	0.740602	113.611	0.213657	1.34939	snoRNA:lola-a,snoRNA:lola-b,snoRNA:lola-c,snoRNA:lola-d,lola
2R:10537066-10538217	205.894	169.729	0.278668	36.1649	0.669349	36.166	0.193158	1.10669	snoRNA:lola-a,snoRNA:lola-b,snoRNA:lola-c,snoRNA:lola-d,lola
2R:10538983-10539618	72.7889	144.363	-0.987911	71.5741	0.929798	-71.5809	-0.684768	2.65637	lola
2R:10541326-10543663	535.476	581.727	-0.119519	46.2503	0.417415	-46.2505	-0.082844	0.540281	asRNA:CR45135,lola
2R:10544783-10548115	171.263	98.8572	0.792798	72.4062	0.912208	72.4105	0.549526	2.43278	lncRNA:acal
2R:10548299-10548959	139.41	189.434	-0.442365	50.0243	0.796388	-50.0262	-0.306624	1.59154
2R:10551027-10553485	428.681	518.018	-0.273098	89.3371	0.694515	-89.3375	-0.189297	1.18586
2R:10554647-10556589	434.34	384.442	0.176059	49.8981	0.550221	49.8984	0.122035	0.799
2R:10561896-10564054	237.259	170.12	0.479914	67.1396	0.834049	67.1413	0.332651	1.79606	psq
2R:10569044-10570565	320.443	311.168	0.0423741	9.27501	0.164052	9.2751	0.0293715	0.179188	psq
2R:10570650-10572833	225.061	191.282	0.234619	33.7796	0.611774	33.7804	0.162626	0.946168	psq
2R:10581136-10584833	78.2605	74.1539	0.0777621	4.10662	0.206562	4.10736	0.0539006	0.23138	psq
2R:10598834-10604575	151.043	112.327	0.427264	38.7169	0.766752	38.7192	0.296157	1.45565	psq
2R:10611313-10611846	67.2181	75.6415	-0.170329	8.42344	0.378459	-8.42516	-0.118063	0.475553	psq
2R:10611972-10613295	151.992	104.362	0.542396	47.6297	0.824684	47.6328	0.37596	1.74116	psq
2R:10617524-10622307	102.739	67.1509	0.613506	35.5881	0.795382	35.5934	0.42525	1.58661	CG11883,psq
2R:10655627-10657418	412.137	442.864	-0.103739	30.7269	0.361495	-30.7271	-0.0719067	0.448625	lncRNA:CR44452
2R:10666501-10675652	82.1616	68.7496	0.257112	13.412	0.515802	13.4144	0.178217	0.725261	stan,lncRNA:CR46229
2R:10675757-10688712	72.2407	60.0381	0.266935	12.2027	0.497609	12.2056	0.185025	0.688376	stan
2R:10700184-10701961	163.39	113.708	0.522987	49.6819	0.823633	49.6847	0.362507	1.73519	stan
2R:10713761-10714744	38.682	54.6307	-0.498049	15.9487	0.595861	-15.9565	-0.345221	0.905996	stan
2R:10722525-10724141	135.163	108.578	0.315975	26.5855	0.667136	26.5874	0.219017	1.10002	Rab3
2R:10724174-10725183	444.933	431.369	0.0446668	13.5644	0.166756	13.5644	0.0309607	0.182429	Rab3,CAH13
2R:10726430-10730867	110.013	94.5909	0.217903	15.4223	0.519065	15.4238	0.151039	0.732023	Rab3,CAH13,Daao1,CG7220
2R:10733120-10735359	248.824	278.521	-0.162658	29.6965	0.500045	-29.697	-0.112746	0.693237	CG7220
2R:10739416-10742024	79.4588	36.1542	1.13604	43.3045	0.853918	43.3194	0.787444	1.92359	Mat1,CG33144
2R:10749558-10753939	71.6963	46.9486	0.610818	24.7478	0.714854	24.7553	0.423387	1.25475	CG33144
2R:10760276-10767218	106.121	76.4149	0.473789	29.7065	0.740021	29.7102	0.328406	1.34715	CG33144,lncRNA:CR43605
2R:10771047-10778173	95.9472	108.35	-0.175381	12.4023	0.45103	-12.4036	-0.121565	0.599712	CG33144
2R:10780436-10781268	76.7929	109.28	-0.508982	32.4869	0.763354	-32.4909	-0.352799	1.44119	CG33144
2R:10784922-10791083	119.977	84.959	0.497914	35.0176	0.774351	35.0211	0.345128	1.48877	mthl13,CG33144,lncRNA:CR44299,lncRNA:CR44300,lncRNA:CR44301
2R:10793665-10801519	110.084	85.7116	0.361041	24.3723	0.672835	24.375	0.250255	1.11729	wde,mthl13,CG33144
2R:10805470-10809481	127.717	82.5304	0.629949	45.1862	0.836865	45.1906	0.436647	1.81318	wde,CG12935
2R:10817834-10818435	38.3279	58.4375	-0.608501	20.1096	0.662241	-20.1188	-0.421781	1.08542	dgo
2R:10859669-10862909	186.514	148.101	0.3327	38.4127	0.715011	38.4141	0.23061	1.2553	CG30015,lncRNA:CR44302
2R:10863147-10864803	454.021	411.354	0.142379	42.6672	0.465402	42.6675	0.0986899	0.62624	CG30015
2R:10865934-10866562	57.6537	150.82	-1.38734	93.166	0.968173	-93.1763	-0.96163	3.44744	CG30015
2R:10866693-10868148	80.2409	138.869	-0.791316	58.6282	0.891355	-58.6335	-0.548498	2.21967	CG30015
2R:10873874-10875208	131.334	71.6819	0.873561	59.6523	0.901323	59.6587	0.605507	2.3159	CG30015,CG30016,nclb
2R:10895780-10896189	38.3462	52.7185	-0.459225	14.3723	0.565107	-14.3796	-0.318311	0.832654	CG12942,ND-B14
2R:10996391-10999215	95.207	69.7813	0.448228	25.4257	0.706003	25.4297	0.310688	1.22419	luna
2R:11032071-11043933	114.535	75.9518	0.592633	38.5832	0.807429	38.5877	0.410782	1.64729	luna
2R:11065654-11069107	49.0124	113.709	-1.21413	64.6968	0.925797	-64.7082	-0.841571	2.60095	luna
2R:11150855-11153375	149.069	156.758	-0.0725563	7.68871	0.244357	-7.68906	-0.0502922	0.280186	CG13229,CG12391
2R:11170822-11176815	82.4518	62.6534	0.396159	19.7985	0.64369	19.8024	0.274597	1.03196	shn,CG13229
2R:11181655-11188330	99.7059	112.947	-0.17989	13.2407	0.461557	-13.2419	-0.124691	0.619074	shn
2R:11190529-11195746	105.019	98.6378	0.0904339	6.38091	0.26693	6.38155	0.062684	0.310515	shn
2R:11197822-11199533	155.08	189.572	-0.28973	34.4916	0.673998	-34.4928	-0.200825	1.12085	shn
2R:11202341-11203397	450.068	523.791	-0.218849	73.7234	0.623687	-73.7237	-0.151695	0.977334	shn
2R:11219121-11221099	141.956	343.26	-1.27386	201.304	0.984623	-201.308	-0.882974	4.17488	CG9084,Syx6
2R:11228324-11229728	297.864	291.727	0.030036	6.13724	0.127911	6.13731	0.0208194	0.136864	metro
2R:11245812-11246872	62.493	90.2723	-0.530589	27.7793	0.736623	-27.7844	-0.367776	1.33417	CG13226,CR30029,CG34225
2R:11270280-11272326	76.1357	64.518	0.238873	11.6178	0.476532	11.6202	0.165574	0.64728	Cpr47Ef
2R:11283368-11284963	89.3191	48.9497	0.867669	40.3694	0.836529	40.3788	0.601422	1.81112	CG9062,CG13220,Fbl6
2R:11296157-11297361	140.224	137.283	0.0305902	2.94195	0.113205	2.94211	0.0212035	0.120141	CG42336
2R:11325252-11325541	44.9521	155.172	-1.78741	110.22	0.981807	-110.235	-1.23894	4.00671	sha
2R:11333519-11334164	38.0534	70.3793	-0.887127	32.3259	0.784945	-32.3381	-0.61491	1.53686	sha
2R:11358141-11362099	69.6041	45.0419	0.627905	24.5622	0.713759	24.5702	0.435231	1.25092	ix,tRNA:SeC-TCA-1-1,iotaTry,san,CG12384,Gr47b
2R:11363199-11366990	187.936	145.931	0.364956	42.0051	0.740937	42.0067	0.252968	1.35068	CG13204,Gr47b
2R:11383048-11384254	39.3292	120.799	-1.61893	81.4693	0.957758	-81.4854	-1.12216	3.16434	Sod3,sprt
2R:11388070-11390001	87.2689	92.3403	-0.0814923	5.07137	0.23079	-5.07203	-0.0564862	0.262391	CG30022,sprt
2R:11392705-11393702	34.5015	129.295	-1.90594	94.7937	0.97233	-94.8128	-1.3211	3.58742	tRNA:Thr-TGT-2-1,sprt
2R:11396364-11398619	41.9491	155.03	-1.88584	113.081	0.983438	-113.097	-1.30716	4.10067	sprt
2R:11400493-11402422	110.193	81.62	0.433043	28.5734	0.723168	28.5767	0.300163	1.28435	tRNA:Thr-TGT-2-2
2R:11413440-11414297	38.17	162.54	-2.09029	124.37	0.988177	-124.388	-1.44888	4.43768	Drip,CG7763
2R:11418697-11419793	37.3956	129.719	-1.79445	92.3232	0.969939	-92.3406	-1.24382	3.50452	Drip
2R:11419862-11421500	38.4145	84.0301	-1.12926	45.6156	0.86364	-45.6296	-0.782741	1.99246	Drip
2R:11423431-11427348	99.0681	75.7147	0.387847	23.3534	0.675897	23.3566	0.268835	1.1267	Drip
2R:11443227-11444850	87.3505	81.8059	0.0946105	5.54457	0.252403	5.54538	0.065579	0.290891	qvr
2R:11482440-11483569	44.7161	86.4638	-0.951302	41.7477	0.844419	-41.7585	-0.659393	1.86059	inv
2R:11485855-11487562	43.3017	105.255	-1.2814	61.9538	0.919941	-61.9671	-0.888199	2.52499	inv
2R:11501102-11502866	40.722	104.717	-1.36261	63.995	0.925417	-64.0095	-0.944493	2.59584	inv
2R:11502985-11503094	42.2449	89.7699	-1.08746	47.525	0.871664	-47.5375	-0.753767	2.05311	inv
2R:11527656-11530267	101.332	138.475	-0.450542	37.1435	0.768808	-37.1462	-0.312292	1.46451	en
2R:11540428-11542710	40.11	66.3139	-0.725348	26.2039	0.732243	-26.2139	-0.502773	1.31767
2R:11565532-11567248	85.6321	128.375	-0.584145	42.7433	0.82113	-42.7473	-0.404899	1.7211
2R:11594645-11596060	72.6959	88.2519	-0.279753	15.556	0.556055	-15.5585	-0.19391	0.812054	tou
2R:11598699-11604392	133.151	119.244	0.159142	13.9067	0.446024	13.9076	0.110309	0.590634	tou
2R:11630053-11632906	490.42	515.654	-0.0723842	25.2335	0.270998	-25.2336	-0.0501729	0.316079	atos
2R:11634562-11636847	299.327	218.065	0.456967	81.2624	0.835457	81.2637	0.316745	1.80458	atos
2R:11650874-11653162	92.3709	123.216	-0.415681	30.8452	0.731617	-30.848	-0.288128	1.31534	tRNA:Met-CAT-1-1,CG9003,Roc2,tRNA:Arg-TCT-1-1,CG34228
2R:11655658-11656608	43.7859	140.312	-1.6801	96.5262	0.973269	-96.5408	-1.16456	3.62193	CG13198,Roc2
2R:11658692-11659439	38.1761	157.261	-2.04242	119.085	0.986187	-119.102	-1.4157	4.28218	Roc2
2R:11661081-11662574	46.5222	109.657	-1.237	63.1346	0.922958	-63.1468	-0.857426	2.56341	tRNA:Met-CAT-1-2,Roc2
2R:11690492-11691844	143.042	71.7165	0.996063	71.3257	0.930513	71.3326	0.690419	2.66661	wal,CG13197
2R:11695898-11696500	56.0975	58.1866	-0.0527502	2.08909	0.118032	-2.08975	-0.0365636	0.1256	CG13197
2R:11703086-11704500	394.79	501.491	-0.345137	106.701	0.775044	-106.701	-0.239231	1.49185	Ir48b,lncRNA:CR45377
2R:11709070-11711152	79.9506	80.4405	-0.00881324	0.489903	0.0319834	-0.489982	-0.00610887	0.032506
2R:11711541-11714421	91.1051	53.3329	0.772506	37.7722	0.819409	37.7801	0.53546	1.71152	pyr
2R:11715460-11718817	132.211	118.249	0.161015	13.9621	0.446292	13.963	0.111607	0.591118	pyr
2R:11719851-11722113	108.512	97.5258	0.153996	10.986	0.405167	10.9871	0.106742	0.519475	pyr
2R:11728690-11730115	37.1163	57.6435	-0.635104	20.5272	0.668231	-20.537	-0.44022	1.10332
2R:11740022-11740989	178.753	160.825	0.152479	17.9284	0.454495	17.9291	0.105691	0.606043
2R:11757151-11757653	474.217	714.247	-0.590875	240.03	0.897993	-240.03	-0.409563	2.28271	ths
2R:11765277-11765694	44.2661	170.181	-1.9428	125.915	0.988467	-125.93	-1.34664	4.46256	ths
2R:11776887-11777929	48.5753	54.7973	-0.173882	6.222	0.320035	-6.22443	-0.120526	0.385714	ths,CG42493
2R:11785197-11789202	79.1004	44.5446	0.828434	34.5558	0.800568	34.5657	0.574227	1.61228	Ir48c,ths
2R:11806074-11809383	130.348	125.746	0.0518456	4.60108	0.17469	4.60137	0.0359366	0.191997	ths
2R:11822403-11822617	74.904	150.234	-1.0041	75.3304	0.935899	-75.3371	-0.695989	2.7473
2R:11830371-11833392	78.3507	70.3957	0.154458	7.95494	0.355795	7.95644	0.107062	0.439739	Sobp
2R:11833438-11837927	98.0627	79.9098	0.295332	18.1529	0.594989	18.1553	0.204709	0.903841	Sobp
2R:11838150-11840306	224.252	139.982	0.679875	84.2696	0.903849	84.2723	0.471253	2.34183	Sobp
2R:11842081-11845490	122.786	85.9124	0.51521	36.8738	0.786666	36.8774	0.357116	1.5449	S2P,Sln,CG34229,CG43190,asRNA:CR44304
2R:11909799-11912327	43.3948	75.0563	-0.790449	31.6614	0.77967	-31.6713	-0.547898	1.51263	reb
2R:11914844-11917124	48.8402	87.5798	-0.84253	38.7396	0.826986	-38.7488	-0.583997	1.75438	lncRNA:CR44305
2R:11917459-11918064	39.8321	113.666	-1.51279	73.8334	0.945555	-73.8489	-1.04859	2.91056	lncRNA:CR44305
2R:11918635-11920940	41.7465	92.3646	-1.14569	50.6182	0.884449	-50.6312	-0.79413	2.15804	lncRNA:CR44305
2R:11929123-11929799	47.6658	62.8835	-0.399728	15.2177	0.577511	-15.223	-0.277071	0.861592	lncRNA:CR44312
2R:11930151-11932475	40.219	117.257	-1.54373	77.0384	0.9515	-77.0539	-1.07003	3.02619	lncRNA:CR44312
2R:11947820-11949964	38.1073	98.1349	-1.3647	60.0276	0.915493	-60.0431	-0.945936	2.47092	exp
2R:11952802-11955196	36.5651	79.2265	-1.11551	42.6614	0.850342	-42.676	-0.773216	1.8994	exp
2R:11957922-11959645	40.9688	76.0749	-0.892894	35.1061	0.804635	-35.1174	-0.618907	1.63289	exp
2R:12006460-12009983	75.8473	60.4167	0.328149	15.4305	0.569912	15.434	0.227456	0.843765	otk
2R:12015540-12019227	129.669	111.663	0.215678	18.0056	0.542197	18.0069	0.149497	0.781317	otk,lncRNA:CR44306
2R:12034258-12034617	513.68	375.961	0.450285	137.718	0.841134	137.719	0.312114	1.83969	CG8321,pds5
2R:12051888-12056151	105.828	59.3376	0.834708	46.4908	0.861472	46.4983	0.578576	1.97669	Drep3,CG30039,CG44314
2R:12057080-12058058	332.77	204.327	0.703648	128.443	0.921662	128.445	0.487731	2.54672	Drep3,CG44314
2R:12077497-12079010	185.091	108.181	0.774786	76.9099	0.914756	76.9138	0.53704	2.46223	CG8888
2R:12096851-12098938	291.789	278.269	0.0684461	13.5202	0.263511	13.5203	0.0474432	0.305861	jeb
2R:12109630-12112083	232.766	244.038	-0.068231	11.2729	0.258862	-11.2731	-0.0472942	0.299568	jeb
2R:12120094-12122454	272.387	251.638	0.114306	20.7487	0.379822	20.749	0.079231	0.477749	jeb
2R:12134287-12136913	125.472	167.341	-0.415416	41.8681	0.770976	-41.8702	-0.287945	1.47393
2R:12140000-12140897	128.643	42.5093	1.59752	86.1337	0.963055	86.1485	1.10732	3.29832	SkpB,Smyd4-4,CG18343
2R:12170251-12172575	357.055	397.335	-0.154209	40.2799	0.487908	-40.2802	-0.10689	0.669252	Oda,SmD3,asRNA:CR46194,mir-281-1,mir-281-2
2R:12172592-12174828	273.037	270.728	0.0122501	2.30857	0.0552948	2.3086	0.00849109	0.0568824	CCT5,Oda,asRNA:CR46194
2R:12230918-12235497	180.501	163.72	0.140776	16.781	0.431474	16.7816	0.0975786	0.564708	lncRNA:CR44313
2R:12250709-12254338	121.353	90.116	0.429356	31.2371	0.737249	31.2401	0.297607	1.33655	CG13168
2R:12260887-12263746	222.419	192.884	0.205547	29.5351	0.577735	29.5358	0.142474	0.862121	Cam,lncRNA:CR43900
2R:12264747-12267029	169.133	122.469	0.465737	46.6636	0.801931	46.6659	0.322824	1.61914	Cam
2R:12269270-12269841	469.724	469.951	-0.000697134	0.227033	0.0135443	-0.227034	-0.000483216	0.0136369	Cam
2R:12272619-12273906	379.255	355.796	0.0921196	23.4594	0.330271	23.4596	0.0638524	0.400883	Cam
2R:12280409-12284503	207.88	157.72	0.398382	50.1596	0.777748	50.1612	0.276137	1.50394	CG42700
2R:12289117-12295465	113.889	67.9806	0.744437	45.9087	0.853113	45.9147	0.516005	1.91809	CG42700
2R:12312684-12313339	38.4821	57.0967	-0.56922	18.6146	0.641143	-18.6233	-0.394553	1.02483	CG30046,CG30203
2R:12335665-12337152	161.622	43.0523	1.90847	118.57	0.985785	118.585	1.32285	4.25347	tRNA:His-GTG-2-1Psi,tRNA:His-GTG-1-4,CG8490,Den1,tRNA:His-GTG-1-3,CG34021
2R:12377554-12378730	47.0491	72.313	-0.620089	25.264	0.720755	-25.2716	-0.429813	1.27566	CG13155,Cpr49Ab,Cpr49Aa
2R:12380330-12380540	41.961	58.3157	-0.474834	16.3547	0.602164	-16.3616	-0.32913	0.921714	CG13155,Cpr49Ab
2R:12398750-12399881	41.3627	97.6307	-1.239	56.268	0.90472	-56.2816	-0.858812	2.35094	CG30048
2R:12406616-12408164	30.9878	89.1233	-1.5241	58.1355	0.910643	-58.1555	-1.05643	2.41512	Cpr49Af,Cpr49Ag,CG30050
2R:12408203-12409360	27.9575	138.66	-2.31024	110.702	0.982433	-110.726	-1.60134	4.04171	Cpr49Ag,CG30050,CG33626
2R:12411647-12414660	40.6029	91.8567	-1.1778	51.2538	0.88646	-51.2673	-0.81639	2.1756	Cpr49Ah,CG33626,CG33627
2R:12439163-12446775	156.739	160.776	-0.0366899	4.03722	0.145836	-4.03739	-0.0254315	0.157632	Dyb,CG30334
2R:12456095-12457302	172.833	112.595	0.61824	60.2383	0.866702	60.2414	0.428532	2.01517	Lac
2R:12479256-12480143	442.412	472.781	-0.0957832	30.3695	0.36145	-30.3697	-0.0663919	0.448555	Dh44-R2
2R:12495151-12499804	96.3593	71.9899	0.42063	24.3694	0.691498	24.3731	0.291559	1.17603	fdl,s-cup
2R:12503901-12505431	430.647	370.88	0.215555	59.7676	0.620312	59.7679	0.149412	0.968405	fdl
2R:12533441-12534844	57.7195	84.3328	-0.547035	26.6133	0.728734	-26.6189	-0.379175	1.30465	fra
2R:12534919-12538101	94.9934	129.484	-0.446879	34.491	0.758169	-34.4939	-0.309753	1.41952	fra
2R:12538738-12542371	76.0433	85.3521	-0.166605	9.30879	0.396563	-9.31028	-0.115482	0.505113	fra
2R:12548120-12548969	251.28	556.42	-1.14688	305.14	0.979505	-305.143	-0.794956	3.88756	fra
2R:12586611-12589603	391.222	557.089	-0.509921	165.867	0.869988	-165.868	-0.35345	2.04013	Sin3A,lncRNA:CR30055
2R:12594922-12599215	82.4666	97.0257	-0.234558	14.5591	0.51607	-14.561	-0.162583	0.725815	Amph,lncRNA:CR43909
2R:12599357-12607794	88.7954	72.4096	0.294305	16.3858	0.570605	16.3885	0.203997	0.845378	Amph
2R:12608781-12611142	66.767	89.662	-0.42536	22.8949	0.681329	-22.8989	-0.294837	1.14359	Amph
2R:12616902-12617896	138.988	69.2312	1.00546	69.7566	0.928747	69.7638	0.696934	2.64152	Galphaq,CG45086
2R:12647106-12648797	115.73	84.4597	0.454429	31.2704	0.743284	31.2737	0.314986	1.35978	CG8785
2R:12661622-12662437	36.3792	117.961	-1.69712	81.5816	0.958093	-81.5993	-1.17636	3.1723	nemy
2R:12664576-12665137	41.2735	187.881	-2.18653	146.608	0.993541	-146.624	-1.51559	5.04224	nemy
2R:12677447-12682404	113.857	124.608	-0.13017	10.7507	0.376693	-10.7515	-0.0902273	0.472716	Nup188,GLS
2R:12685762-12688369	160.792	110.872	0.5363	49.9199	0.830003	49.9228	0.371735	1.77198	Nup188,CG13148,CG30053
2R:12692451-12694688	139.174	97.1314	0.518884	42.043	0.804747	42.0462	0.359663	1.63346	CG8768
2R:12703317-12705809	100.135	78.3763	0.353452	21.7583	0.648853	21.7612	0.244994	1.04655	CG42663
2R:12718508-12719618	132.853	113.178	0.231243	19.6755	0.562402	19.6768	0.160285	0.826455	CG42663
2R:12719685-12721363	162.218	228.846	-0.49644	66.6275	0.841268	-66.6294	-0.344106	1.84054	CG42663
2R:12725972-12727441	116.093	107.339	0.113103	8.75376	0.3275	8.75449	0.0783974	0.396753	CG42663
2R:12729567-12730993	466.078	470.366	-0.0132127	4.2881	0.0576192	-4.28812	-0.00915834	0.0593459	CG42663
2R:12735101-12737777	34.9432	75.2634	-1.10693	40.3201	0.837803	-40.3353	-0.767268	1.81895	CG42663
2R:12741312-12743865	119.597	67.157	0.832566	52.4395	0.880224	52.4461	0.577091	2.12214	CG42663
2R:12755086-12755976	496.738	399.922	0.312767	96.8163	0.73935	96.8168	0.216794	1.34458	Taz,mRpL18
2R:12804805-12807411	101.497	113.471	-0.160879	11.9734	0.427048	-11.9745	-0.111513	0.556954	CG17580
2R:12867453-12871097	71.9539	59.6927	0.269519	12.2612	0.498704	12.2642	0.186816	0.690558	bic,CG17574,asRNA:CR45140
2R:12879000-12881020	199.632	211.574	-0.0838185	11.9419	0.286107	-11.9421	-0.0580985	0.337022	AspRS,Nmda1,asRNA:CR45141
2R:12915735-12918291	193.107	112.236	0.782867	80.8711	0.919226	80.8749	0.542642	2.5161	NAT1
2R:12922442-12924545	143.201	48.7126	1.55568	94.4886	0.9709	94.5014	1.07831	3.53701	NAT1,CG13319,sug
2R:12937570-12938400	78.0718	94.2111	-0.271096	16.1393	0.558692	-16.1416	-0.18791	0.818012	Sans,CG30487
2R:12971192-12972329	128.878	130.517	-0.0182351	1.63931	0.0750749	-1.63941	-0.0126396	0.0780425	Psc
2R:12983306-12986399	60.1493	59.4299	0.0173582	0.719368	0.0477627	0.719577	0.0120318	0.048941	lncRNA:CR44339
2R:12995679-12999462	131.078	120.215	0.124809	10.863	0.362232	10.8637	0.0865108	0.449781	Su(z)2
2R:13010095-13011616	111.906	85.3312	0.391136	26.5743	0.698114	26.5772	0.271115	1.1977
2R:13030300-13033339	50.9728	76.5381	-0.586451	25.5653	0.722766	-25.572	-0.406497	1.28289
2R:13059080-13064762	86.9289	51.5082	0.755034	35.4207	0.804926	35.4287	0.52335	1.63438	Drl-2
2R:13073681-13081217	115.129	103.981	0.146927	11.1477	0.407022	11.1486	0.101842	0.522599	Drl-2
2R:13116514-13119787	77.7362	43.4099	0.840563	34.3263	0.799137	34.3366	0.582634	1.60513	CG13325
2R:13128552-13129592	75.9963	36.6169	1.05342	39.3795	0.832529	39.3935	0.730176	1.78694	CG3955,CG13326
2R:13162956-13163304	41.4436	79.4832	-0.939501	38.0396	0.823901	-38.0512	-0.651213	1.73671	Nrk,CG15870,GLaz
2R:13164566-13166356	103.162	148.077	-0.521435	44.915	0.812793	-44.918	-0.361431	1.67554	CG15870,GLaz
2R:13170062-13172750	96.2874	68.4695	0.491884	27.8178	0.731282	27.8222	0.340948	1.31409	AGBE,Spt-I,asRNA:CR45142
2R:13188820-13190692	122.257	117.799	0.0535839	4.45751	0.172813	4.45783	0.0371415	0.189725	seq,CG17724,Kdm4B
2R:13191534-13194042	334.763	339.165	-0.0188448	4.40144	0.0912789	-4.40148	-0.0130622	0.095717	Kdm4B
2R:13196682-13198215	125.063	82.8147	0.594693	42.248	0.82075	42.2522	0.41221	1.71897	ValRS,Kdm4B
2R:13216136-13216954	256.32	276.897	-0.111406	20.5775	0.379442	-20.5778	-0.077221	0.477136	CG4627,CG4630
2R:13218287-13221240	141.249	90.4196	0.643529	50.829	0.853337	50.833	0.44606	1.91962	CG4630,CG4646,CG17059,Fsn
2R:13259905-13263794	176.045	166.057	0.0842657	9.98802	0.279536	9.98838	0.0584085	0.32786	CG42319
2R:13266148-13272411	96.9955	62.3026	0.638626	34.6929	0.793438	34.6988	0.442662	1.57715	Dh31-R,CG42319
2R:13277451-13280534	156.53	157.305	-0.00712117	0.774546	0.0411694	-0.774579	-0.00493602	0.0420408	Dh31-R
2R:13285483-13287031	383.083	352.945	0.118213	30.1379	0.413392	30.1382	0.0819393	0.533399	Dh31-R
2R:13290182-13292325	250.593	226.774	0.144091	23.819	0.450874	23.8195	0.0998765	0.599427	Dh31-R
2R:13294342-13297621	274.207	162.329	0.756342	111.878	0.929596	111.88	0.524256	2.65351	CG4734,Dh31-R
2R:13298578-13299947	80.7413	84.9148	-0.0727105	4.17358	0.198516	-4.17421	-0.0503991	0.22129	CG4734,CG17047
2R:13322888-13326029	201.251	265.15	-0.397814	63.8992	0.793684	-63.9005	-0.275743	1.57835
2R:13336248-13337483	431.628	275.72	0.646583	155.908	0.912275	155.909	0.448177	2.43355	lncRNA:CR44206
2R:13338446-13340133	157.89	404.027	-1.35553	246.137	0.988557	-246.141	-0.939585	4.47034	lncRNA:CR44206
2R:13350973-13353902	135.777	100.463	0.434565	35.3132	0.754884	35.3159	0.301218	1.40602	CG17048
2R:13355855-13360946	79.9677	174.733	-1.12766	94.7653	0.96044	-94.772	-0.781636	3.22993	lncRNA:CR45312
2R:13385917-13387479	244.781	277.604	-0.181538	32.8233	0.538823	-32.8238	-0.125833	0.773972
2R:13427630-13432890	78.2667	96.2272	-0.298046	17.9605	0.592799	-17.9629	-0.206589	0.898448	tRNA:Ile-AAT-1-3,tRNA:Ile-AAT-1-4,tRNA:Ile-AAT-1-5,tRNA:Ile-AAT-1-6,tRNA:Ile-AAT-1-7,tRNA:Leu-CAA-2-1,tRNA:Leu-CAA-1-1,CG30065,ATP8A
2R:13437560-13439222	136.917	81.8948	0.741461	55.0225	0.878235	55.0275	0.513941	2.10566	cnn,tRNA:Ile-AAT-1-8,ATP8A
2R:13446994-13450849	120.684	98.3001	0.295967	22.3836	0.630258	22.3856	0.205148	0.99495	cnn,CG30062,Golgin97
2R:13457781-13458175	38.482	63.8784	-0.731146	25.3965	0.724576	-25.407	-0.506792	1.28945	arr
2R:13465178-13469486	153.214	152.329	0.00835074	0.884283	0.0440079	0.884323	0.00578829	0.0450056	arr
2R:13475633-13477811	159.371	124.391	0.357514	34.9807	0.722565	34.9825	0.24781	1.28217	arr,CG43192
2R:13480748-13482573	132.326	101.72	0.379499	30.6065	0.71624	30.6088	0.263048	1.25963	arr,cbc
2R:13488701-13490870	67.0036	69.8694	-0.0604208	2.86574	0.152541	-2.86637	-0.0418805	0.165513	bbc
2R:13491448-13495099	168.492	136.72	0.301452	31.7717	0.673484	31.7731	0.208951	1.11927	drk,bbc
2R:13543865-13546373	48.9806	99.0132	-1.01541	50.0326	0.880582	-50.0429	-0.703829	2.12513	Nadk1a
2R:13561856-13563683	40.9894	72.6321	-0.825356	31.6427	0.779871	-31.6535	-0.572093	1.51354
2R:13575903-13581568	152.557	135.234	0.173888	17.3227	0.481159	17.3236	0.12053	0.656157	CG6191,lncRNA:CR44365,lncRNA:CR44366,CG45088
2R:13583622-13586681	82.0181	89.3003	-0.122723	7.2822	0.317576	-7.28324	-0.0850649	0.382105	CG6191,CG45088
2R:13588514-13590419	147.6	123.233	0.260312	24.3677	0.61497	24.3691	0.180435	0.954435	CG6191,CG45088
2R:13591395-13593199	382.106	284.879	0.423621	97.2265	0.819633	97.2274	0.293632	1.71276	CG6191,fand,CG45088
2R:13598479-13599729	74.6168	44.5455	0.744221	30.0713	0.766752	30.0805	0.515855	1.45565	S-Lap5,CG43058
2R:13642112-13647084	137.345	86.645	0.664615	50.6999	0.85622	50.7043	0.460676	1.93947	tei
2R:13649046-13653362	107.502	133.713	-0.314773	26.2107	0.659045	-26.2126	-0.218184	1.07601	tei
2R:13656252-13657986	190.201	179.354	0.0847169	10.8472	0.282732	10.8476	0.0587212	0.332306	tei
2R:13686817-13689686	107.499	77.4131	0.47368	30.0864	0.742233	30.0901	0.32833	1.3557	tei
2R:13692239-13693270	174.574	107.374	0.70119	67.1996	0.892472	67.2033	0.486028	2.23001	tei,CG6220
2R:13695085-13698859	166.931	145.659	0.196656	21.2719	0.538957	21.2728	0.136311	0.774263	tei
2R:13703782-13705829	264.786	338.737	-0.355337	73.9506	0.774708	-73.9515	-0.246301	1.49036	tei
2R:13714804-13719076	74.5207	44.7175	0.736801	29.8032	0.764382	29.8123	0.510712	1.44555	tei
2R:13723209-13725839	162.096	122.803	0.400496	39.2924	0.75618	39.2944	0.277603	1.41132	tei
2R:13737267-13744270	88.9779	62.1233	0.518311	26.8545	0.727102	26.8595	0.359266	1.29866	tei
2R:13751394-13752771	85.5885	44.792	0.934175	40.7965	0.839077	40.8072	0.647521	1.82683
2R:13799269-13800681	41.9072	82.5224	-0.977586	40.6152	0.838675	-40.6269	-0.677611	1.82433	Cpr50Cb
2R:13803235-13804512	55.6093	75.3547	-0.438372	19.7454	0.648943	-19.7503	-0.303856	1.04681	Cpr50Cb
2R:13804890-13808346	91.1439	58.0236	0.651506	33.1203	0.784587	33.1267	0.45159	1.5352	Cpr50Cb,stj
2R:13818181-13819843	98.4142	35.2043	1.48312	63.2099	0.924053	63.2273	1.02802	2.57773	fl(2)d,stj
2R:13821482-13825244	153.859	114.357	0.428066	39.5021	0.769434	39.5044	0.296713	1.46722	fl(2)d,CG13339
2R:13825654-13830593	132.412	93.8271	0.496953	38.5846	0.789236	38.5878	0.344462	1.55702	CG13339,CG6329
2R:13865019-13866382	109.983	63.4985	0.792485	46.4844	0.858545	46.4912	0.549309	1.95577	shot,CG13344
2R:13881489-13882269	39.6868	63.5867	-0.680066	23.8999	0.708372	-23.9096	-0.471386	1.23228	shot
2R:13895205-13898218	187.823	120.281	0.64296	67.5415	0.88056	67.5445	0.445666	2.12494	shot
2R:13898254-13900906	35.7708	81.0392	-1.17984	45.2684	0.862165	-45.2838	-0.817802	1.9817	shot
2R:13909364-13911601	41.9543	177.128	-2.07791	135.174	0.991082	-135.19	-1.44029	4.71971	shot
2R:13913374-13916879	57.1326	141.241	-1.30578	84.1088	0.958182	-84.1189	-0.905095	3.17444	shot
2R:13920742-13923120	64.8325	80.0761	-0.304655	15.2436	0.558156	-15.2467	-0.211171	0.816798	shot
2R:13926034-13927560	44.5333	116.501	-1.38739	71.9678	0.941911	-71.9812	-0.961664	2.84579	shot
2R:13933906-13936484	135.471	125.894	0.105779	9.57735	0.336418	9.57793	0.0733201	0.410102	shot
2R:13938131-13940568	205.194	206.243	-0.00735633	1.04896	0.0475392	-1.04899	-0.00509902	0.0487064	shot
2R:13951139-13955235	109.44	141.899	-0.374727	32.4591	0.719257	-32.4613	-0.259741	1.27032	mRpL53,CG33155,AGO1
2R:13956049-13958013	392.675	422.237	-0.104717	29.5619	0.361316	-29.5621	-0.0725842	0.448345	Rpn13,mRpL53,CG33155,AGO1
2R:13962363-13966980	86.8943	68.0391	0.352897	18.8552	0.621005	18.8585	0.24461	0.970232	Cp1,CG42806
2R:13978132-13979150	38.517	114.667	-1.57389	76.1502	0.950114	-76.1665	-1.09093	2.99801	CG6701
2R:13979438-13980310	45.9805	145.794	-1.66484	99.8135	0.975236	-99.8274	-1.15398	3.69836	CG6701,Ctf4
2R:13983020-13983829	142.087	44.4821	1.67548	97.6047	0.974118	97.619	1.16135	3.65422	RN-tre,Ctf4,CG8067
2R:13990260-13992676	146.474	134.976	0.117935	11.4974	0.367842	11.498	0.0817465	0.458616	mam,RN-tre
2R:13998638-14001263	305.357	329.758	-0.110911	24.4012	0.384762	-24.4014	-0.076878	0.485745	mam
2R:14005452-14007300	528.662	495.224	0.0942639	33.4378	0.333669	33.4379	0.0653388	0.405968	mam,mir-4978
2R:14009494-14010001	305.36	212.87	0.520536	92.4896	0.863953	92.4911	0.360808	1.99476	mam
2R:14022573-14025749	218.536	230.887	-0.0793194	12.3515	0.287381	-12.3518	-0.05498	0.338808	mam
2R:14031094-14038068	174.573	152.219	0.197683	22.3541	0.543494	22.355	0.137023	0.784153	mam
2R:14040259-14044577	130.504	101.221	0.366596	29.2839	0.70569	29.2862	0.254105	1.22312	mam
2R:14047578-14049745	96.9465	62.7153	0.628371	34.2312	0.789638	34.237	0.435554	1.55893	mam
2R:14049756-14052090	214.419	200.441	0.0972532	13.9777	0.340217	13.9781	0.0674108	0.415845	mam
2R:14074823-14078750	82.6619	100.142	-0.276754	17.4802	0.578807	-17.4824	-0.191831	0.864665	Prosap
2R:14078924-14080151	48.6224	62.8797	-0.370973	14.2573	0.556904	-14.2621	-0.257139	0.813969	Prosap
2R:14085404-14090544	64.6826	48.5057	0.415224	16.1769	0.595704	16.1822	0.287811	0.905609	Prosap,CG42287,CG42288
2R:14119647-14121358	417.787	332.948	0.327473	84.8396	0.756359	84.8402	0.226987	1.41206	Prosap
2R:14137807-14140850	215.473	187.807	0.198255	27.6659	0.560145	27.6666	0.13742	0.82131	Prosap
2R:14159356-14160047	30.9879	62.2546	-1.00648	31.2667	0.77739	-31.2829	-0.697635	1.50234	CG13016,CysRS-m
2R:14185239-14186290	25.9344	95.3239	-1.87797	69.3894	0.937821	-69.4148	-1.30171	2.77774	Sdb
2R:14207402-14208990	433.412	395.724	0.131248	37.6889	0.441151	37.6891	0.0909738	0.581877	Sox15
2R:14211143-14213481	60.519	94.0626	-0.636234	33.5436	0.786889	-33.5497	-0.441004	1.54594	Sox15
2R:14220425-14223014	38.1286	91.9103	-1.26935	53.7818	0.895691	-53.7967	-0.87985	2.2604	CG8468
2R:14225350-14227357	51.8111	81.4285	-0.652272	29.6174	0.760203	-29.6245	-0.45212	1.42796	CG8468
2R:14267925-14269048	45.3735	112.833	-1.31427	67.4598	0.93277	-67.4726	-0.910983	2.69964	CG8547,Sps1
2R:14271869-14272879	38.612	63.9642	-0.728217	25.3523	0.723951	-25.3627	-0.504762	1.28718	conv
2R:14273642-14275745	113.598	96.2126	0.239638	17.3853	0.553395	17.3869	0.166105	0.806081	conv,Ih
2R:14278197-14281473	123.146	200.084	-0.700239	76.9382	0.903424	-76.9414	-0.485369	2.33743	Ih
2R:14282028-14283167	192.124	110.997	0.791518	81.127	0.921014	81.1309	0.548638	2.53848	Ih
2R:14295395-14297053	114.216	83.9271	0.444558	30.289	0.735327	30.2923	0.308144	1.32926	Ih
2R:14302764-14304061	50.6811	123.433	-1.2842	72.7516	0.942135	-72.7629	-0.890142	2.84964	tej
2R:14307707-14310397	43.24	84.5841	-0.968021	41.3441	0.842296	-41.3555	-0.670981	1.84703	Shrm
2R:14316936-14317575	43.691	76.9583	-0.816741	33.2673	0.791628	-33.2773	-0.566121	1.56843	Shrm
2R:14324040-14325960	35.1977	117.978	-1.74497	82.7806	0.959747	-82.799	-1.20952	3.21257	Shrm
2R:14329758-14333781	85.1046	126.808	-0.57534	41.7037	0.817375	-41.7077	-0.398795	1.70032	Shrm
2R:14335031-14336374	42.3156	147.4	-1.80047	105.084	0.978834	-105.1	-1.24799	3.85537	Shrm
2R:14339355-14340478	37.7447	92.7045	-1.29636	54.9598	0.90025	-54.9751	-0.898571	2.30509	Shrm
2R:14342185-14343539	41.8307	146.479	-1.80806	104.648	0.978633	-104.664	-1.25325	3.84591	Shrm
2R:14344177-14345297	32.9567	81.5204	-1.30659	48.5637	0.876604	-48.5813	-0.905659	2.09235	Shrm
2R:14382252-14384195	185.174	163.532	0.179307	21.6419	0.514394	21.6426	0.124286	0.722357	Dh44-R1
2R:14416571-14417959	53.9577	76.4644	-0.50296	22.5067	0.686693	-22.5123	-0.348625	1.16057
2R:14430736-14432440	93.9929	57.5516	0.707695	36.4413	0.808949	36.4481	0.490537	1.65522	phyl,lncRNA:CR45277
2R:14483200-14485440	130.479	112.726	0.210996	17.7528	0.530151	17.7541	0.146251	0.755343	PRAS40
2R:14488273-14488873	283.349	272.325	0.0572545	11.0247	0.229873	11.0249	0.0396858	0.2612	PRAS40
2R:14490106-14492206	268.562	207.531	0.371929	61.031	0.773457	61.0321	0.257801	1.48482	PRAS40
2R:14492339-14494049	153.077	117.187	0.385445	35.8899	0.741227	35.892	0.26717	1.35181	PRAS40
2R:14503889-14505320	448.931	203.542	1.14116	245.388	0.978521	245.391	0.790995	3.84069	Cpsf160,Asx
2R:14526755-14529638	113.281	151.131	-0.415899	37.8504	0.760024	-37.8527	-0.288279	1.42722	ttv
2R:14546135-14551270	77.1807	92.7123	-0.264521	15.5316	0.546556	-15.5339	-0.183352	0.790883	CG30076,ttv
2R:14554414-14561032	80.8363	69.0345	0.227685	11.8018	0.475236	11.804	0.157819	0.644806	CG43919,ttv
2R:14580217-14582349	284.049	285.726	-0.00849209	1.67692	0.0529033	-1.67694	-0.00588626	0.0543541	ttv
2R:14604036-14605720	206.608	138.505	0.576954	68.1026	0.86744	68.105	0.399914	2.02072	tra2,CG12868,CG33468,CG33469,scaRNA:PsiU5-44
2R:14617893-14620356	115.016	53.9283	1.09272	61.0878	0.915247	61.0976	0.757417	2.46802	Sec61beta,Su(var)2-HP2,CG12863
2R:14625778-14629510	306.406	208.999	0.551951	97.4074	0.875844	97.409	0.382583	2.08621	Had2
2R:14636219-14637045	358.908	370.639	-0.0463975	11.7302	0.201019	-11.7303	-0.0321603	0.224418
2R:14644787-14648618	141.584	123.89	0.192598	17.694	0.508471	17.6951	0.133499	0.710234	CG10139
2R:14677534-14678920	156.323	236.073	-0.594699	79.7497	0.880314	-79.7519	-0.412214	2.12288	mspo,CG30479,CG30480
2R:14686466-14699776	138.275	99.3464	0.477	38.9285	0.784699	38.9314	0.330631	1.53572	mspo
2R:14705176-14707509	139.633	59.5116	1.23039	80.1211	0.951857	80.1305	0.852843	3.03359	mspo
2R:14732219-14735821	223.334	343.584	-0.621461	120.25	0.901144	-120.252	-0.430764	2.31409
2R:14743779-14748023	85.0546	58.4736	0.540604	26.581	0.72746	26.5865	0.374718	1.29997	Dro,AttA,jef
2R:14764066-14768268	86.0642	93.1627	-0.114339	7.09848	0.304613	-7.0994	-0.0792536	0.363287	Spred
2R:14770752-14771983	94.7494	69.0248	0.457002	25.7246	0.710473	25.7286	0.316769	1.23951	kn,BEAF-32,asRNA:CR42254
2R:14845069-14845531	42.5578	116.001	-1.44665	73.4435	0.944795	-73.4577	-1.00274	2.89669	NaPi-T,CG10209
2R:14854574-14855587	80.3795	118.113	-0.555272	37.7338	0.799026	-37.7379	-0.384885	1.60458	Ercc1,Ciao1,HPS1
2R:14861389-14862311	99.2287	67.7243	0.551084	31.5044	0.764606	31.5092	0.381982	1.44649	U3-55K,Pcf11
2R:14881377-14882729	38.9105	91.7418	-1.23742	52.8313	0.892472	-52.8458	-0.857714	2.23001	Cyp6a9,Cyp6a20
2R:14897942-14899823	41.0056	83.343	-1.02324	42.3374	0.848107	-42.3497	-0.709256	1.88458	Cyp317a1
2R:14920915-14921768	65.7794	141.209	-1.10213	75.4299	0.941666	-75.438	-0.763936	2.84156	Kank
2R:14942268-14945419	105.398	54.7035	0.946146	50.6947	0.881074	50.7036	0.655819	2.12925	CG10257,aPKC
2R:14953480-14957217	167.477	204.487	-0.288049	37.0103	0.680099	-37.0115	-0.19966	1.13974	aPKC
2R:14971308-14972623	111.236	79.945	0.476551	31.2915	0.751062	31.2951	0.33032	1.39055	ckn
[truncated: 5,459 more rows]
